# Supplementary material for: Dosage sensitive maternal siRNAs determine hybridization success in Capsella
Source: Research Square preprint supplement (doi:10.21203/rs.3.rs-3705839/v1), 2023-12-06
Supplement: Supplementary file 1 [file 7b50530331b1ab252a6f91c4.xlsx]

## Sheet: Sheet1
Supplementary Table 2. Summary of sRNA-Seq data.
sample_name	n of raw reads	n of reads after trimming i.e 18-25 nt	structural RNAs == num_r_outfiltered bowtie -v 1	n of reads mapped (total n of small RNA)
Cr × Cr rep1	17882194	3242066	455733	1514917
Cr × Cr rep2	17293819	3706363	359682	1864814
Cg × Cg rep1	13022276	5095890	232993	2269771
Cg × Cg rep2	22012779	7026730	536098	2969020
Cr × Cg rep1	11570623	1502551	207822	615620
Cr × Cg rep2	13907822	1730318	292190	747007
nrpd1 × Cr rep1	30548500	3830948	855769	1359792
nrpd1 × Cr rep2	22019642	2065888	664476	568481
nrpd1 × nrpd1 rep1	19746933	2101384	735405	528711
nrpd1 × nrpd1 rep2	16966209	1699865	479297	424553
