# Supplementary material for: Dosage sensitive maternal siRNAs determine hybridization success in Capsella
Source: Research Square preprint supplement (doi:10.21203/rs.3.rs-3705839/v1), 2023-12-06
Supplement: Supplementary file 2 [file a8aebff8041dde94777df400.xlsx]

## Sheet: Sheet1
Supplementary Table 3. List of siren loci and overlapping genomic features
				sRNA expression in different genotypes (RPM)
siren cluster	Scaffold	Start	Stop	Cr x Cr	Cg x Cg	Cr x Cg	nrpd1 x nrpd1	nrpd1 x Cr	Cr leaves	Ovelapped genes	Ath orthologs	Ath orthologs names	Ath orthologs names	Overlapped TEs
Cluster_35	scaffold_1	130025	133211	306.466	0.0758924	435.599	0	1.97985	13.1606	NA	NA	NA	NA	te55543,te55544,te55545
Cluster_55	scaffold_1	251354	254440	111.653	3766.17	4.43688	5.65161	1.43079	0	Carubv10010156m.g, Carubv10011679m.g	AT1G01530, AT1G01520	AGL28, 0	AGAMOUS-like 28, Homeodomain-like superfamily protein	NA
Cluster_121	scaffold_1	559495	560788	28.1546	158.131	0.756053	0	0	0	Carubv10012183m.g	AT1G02580	EMB173,FIS1,MEA,SDG5	SET domain-containing protein	te55785
Cluster_540	scaffold_1	2835973	2837503	17.3793	3.15962	7.66819	0	4.94562	26.1242	NA	NA	NA	NA	te78535,te78536,te78537
Cluster_720	scaffold_1	3994223	3995461	55.8354	182.134	12.6338	0	14.7687	6.85614	NA	NA	NA	NA	te88261,te88262
Cluster_874	scaffold_1	4607912	4609238	527.805	207.238	754.208	1.01133	0	0.400092	NA	NA	NA	NA	te88064
Cluster_876	scaffold_1	4609727	4610017	779.311	73.1425	1422.11	4.61182	0	1.82448	NA	NA	NA	NA	NA
Cluster_903	scaffold_1	4715209	4716150	1817.74	1122.82	1706.37	5.69869	0	1.12722	NA	NA	NA	NA	te88125,te88126
Cluster_904	scaffold_1	4716251	4717911	479.34	526.549	188.481	0	0.379878	1.5982	Carubv10009445m.g	AT1G13470	0	Protein of unknown function (DUF1262)	NA
Cluster_950	scaffold_1	5084207	5084648	54.6417	18.6053	64.1893	27.3266	51.3919	189.386	NA	NA	NA	NA	NA
Cluster_1014	scaffold_1	5426612	5427023	96.3759	4.10943	135.352	0	4.5945	334.619	NA	NA	NA	NA	NA
Cluster_1110	scaffold_1	5924090	5924371	107.418	40.3115	104.078	0	0	0	NA	NA	NA	NA	te74659
Cluster_1111	scaffold_1	5924621	5924986	1717.93	176.445	2365.64	0	0	1.45061	NA	NA	NA	NA	NA
Cluster_1198	scaffold_1	6475840	6476793	117.999	2.28178	21.5356	0	5.95262	23.745	NA	NA	NA	NA	te5010
Cluster_1334	scaffold_1	7094417	7096853	4039.74	5104.26	3539.18	6.05763	3.10699	0.0726197	NA	NA	NA	NA	te77122,te77123,te77124,te77125,te77126,te77127
Cluster_1335	scaffold_1	7097037	7098471	891.726	6673.4	209.984	8.41698	2.19853	0.246654	Carubv10008428m.g	AT1G20380	0	Prolyl oligopeptidase family protein	te77128,te77129
Cluster_1372	scaffold_1	7297235	7299289	35.2578	1776.53	0.476074	3.26531	0.921136	1.63626	Carubv10008559m.g	AT1G20950	0	Phosphofructokinase family protein	NA
Cluster_1403	scaffold_1	7384546	7386623	1319.65	7427.99	1012.7	6.45833	0.910941	0	Carubv10011795m.g	AT1G21100	0	O-methyltransferase family protein	te77255
Cluster_1404	scaffold_1	7386807	7387618	3344.36	0.893605	3649.47	1.65276	0.777067	0.435897	NA	NA	NA	NA	te77256
Cluster_1450	scaffold_1	7609142	7609901	236.453	142.575	199.528	1.76584	2.4907	174.18	Carubv10012527m.g	AT1G21700	ATSWI3C,CHB4,SWI3C	SWITCH/sucrose nonfermenting 3C	NA
Cluster_1491	scaffold_1	7796147	7799497	1474.32	3113.33	544.783	4.0049	2.44784	0.0528123	Carubv10011921m.g	AT1G22120	0	0	te77445,te77446,te77447,te77448,te77449
Cluster_1507	scaffold_1	7907435	7908020	291.295	26.003	20.0341	16.0312	23.6886	83.051	Carubv10009981m.g	AT1G22430	0	GroES-like zinc-binding dehydrogenase family protein	NA
Cluster_1542	scaffold_1	8096798	8097479	63.023	8.51152	41.6007	1.9678	42.5586	39.4429	NA	NA	NA	NA	te74736
Cluster_1594	scaffold_1	8418092	8418814	41.8974	24.7556	4.05947	0	0.872722	0	NA	NA	NA	NA	te74874,te74875,te74876
Cluster_1595	scaffold_1	8418976	8420641	303.204	895.322	168.536	1.61109	0.378738	0.106227	Carubv10010538m.g	AT1G24020	MLP423	MLP-like protein 423	te74878,te74879
Cluster_1639	scaffold_1	8614752	8617110	19.782	0.307591	19.492	0	10.6991	0.750208	NA	NA	NA	NA	te74991
Cluster_1730	scaffold_1	9048922	9049463	46.8259	0.892506	37.9059	17.3326	50.0592	147.914	NA	NA	NA	NA	NA
Cluster_1731	scaffold_1	9050847	9051052	1850.02	1080.19	745.623	6833.98	1929.69	0.859098	NA	NA	NA	NA	te13412
Cluster_1751	scaffold_1	9241827	9242502	39.9661	1.43118	15.9196	21.8379	11.2008	25.1324	Carubv10012416m.g	AT1G24480	0	S-adenosyl-L-methionine-dependent methyltransferases superfamily protein	te13512
Cluster_1805	scaffold_1	9577485	9578032	55.2771	0.441367	53.5584	0	24.1798	316.809	NA	NA	NA	NA	te13643
Cluster_1853	scaffold_1	9835139	9836142	26.5017	9.39531	1.94887	1.33669	0	1.76269	NA	NA	NA	NA	te13807
Cluster_1857	scaffold_1	9840960	9841458	50.0407	0	0	0	0	0	NA	NA	NA	NA	te13813
Cluster_1859	scaffold_1	9843910	9845551	418.823	1131.28	41.7072	0.817321	0.768548	0	Carubv10012581m.g	AT1G28630	0	0	te13816,te13817
Cluster_1860	scaffold_1	9845642	9846747	356.423	2550.78	75.1883	0	0.570505	0.160013	NA	NA	NA	NA	te13818
Cluster_1861	scaffold_1	9846921	9848189	333.544	1287.87	90.9719	2.11512	1.49167	2.09189	NA	NA	NA	NA	NA
Cluster_1935	scaffold_1	10125078	10125318	107.008	6.02164	48.7137	0	36.6543	151.272	NA	NA	NA	NA	NA
Cluster_1947	scaffold_1	10164264	10164599	92.5909	0.719848	145.585	0	28.1687	723.698	NA	NA	NA	NA	te58667
Cluster_2065	scaffold_1	10750281	10751639	19.5789	2.13571	10.7984	0	6.03585	79.0458	NA	NA	NA	NA	te58983
Cluster_2095	scaffold_1	10916279	10917779	26.7263	1080.92	12.384	9.83507	6.72595	0	NA	NA	NA	NA	te59116
Cluster_2124	scaffold_1	11022084	11022547	108.513	1358.95	0	2.89233	1.35987	0.38141	NA	NA	NA	NA	te83423,te83424,te83425
Cluster_2129	scaffold_1	11026049	11027912	268.8	515.788	50.9111	0	1.01552	0	NA	NA	NA	NA	te83430
Cluster_2152	scaffold_1	11114893	11118007	11.0386	1139.62	0.942215	0.430832	4.65891	4.99959	NA	NA	NA	NA	te83494
Cluster_2210	scaffold_1	11332583	11333668	2122.89	226.947	2986.35	2.47153	3.48607	0.977758	Carubv10011445m.g	AT1G32280	0	Bifunctional inhibitor/lipid-transfer protein/seed storage 2S albumin superfamily protein	NA
Cluster_2211	scaffold_1	11333760	11335197	1236.87	153.229	2453.32	0	1.31637	0.492278	Carubv10011305m.g	AT1G32300	0	D-arabinono-1,4-lactone oxidase family protein	NA
Cluster_2236	scaffold_1	11418825	11419043	444.864	278.315	1143.62	1372.68	1068.92	20086.2	NA	NA	NA	NA	NA
Cluster_2261	scaffold_1	11518743	11519065	534.816	256.097	354.381	0	3.90699	1.09581	NA	NA	NA	NA	NA
Cluster_2275	scaffold_1	11569108	11571250	1066.26	3161	419.09	5.63619	1.47218	1.81681	Carubv10011117m.g	AT1G32850	UBP11	ubiquitin-specific protease 11	te83845
Cluster_2276	scaffold_1	11571381	11573562	986.04	3084.33	377.075	5.53546	1.44587	0.0811064	Carubv10011117m.g	AT1G32850	UBP11	ubiquitin-specific protease 11	NA
Cluster_2296	scaffold_1	11649618	11649804	140.098	19.4013	52.3173	14.3534	57.3616	34.0699	NA	NA	NA	NA	te83903
Cluster_2332	scaffold_1	11772032	11773182	30.5856	3.36221	16.9997	1.16598	7.6748	147.299	NA	NA	NA	NA	te83991,te83992
Cluster_2402	scaffold_1	12017729	12019137	276.58	1831.27	104.152	0.952477	0	0.251205	NA	NA	NA	NA	te69993
Cluster_2444	scaffold_1	12143133	12143507	58.9463	4.51489	7.82666	3.57877	20.1913	3.77545	Carubv10012424m.g	AT1G35540	ARF14	auxin response factor 14	te70121
Cluster_2491	scaffold_1	12244208	12244423	608.339	552.044	715.632	279.592	1177.24	1497.73	NA	NA	NA	NA	NA
Cluster_2522	scaffold_1	12288631	12291501	46.6239	1088.79	10.2229	1.86979	8.79106	0.30821	NA	NA	NA	NA	te70302,te70303,te70304
Cluster_2529	scaffold_1	12298822	12300638	13.9679	29.1521	9.15336	1.4772	4.51443	50.9397	NA	NA	NA	NA	te70313,te70314,te70315,te70316,te70317
Cluster_2687	scaffold_1	12511005	12512363	36.1456	7.11903	10.0785	0.987521	7.89303	50.3966	Carubv10012570m.g	AT4G10220	0	Protein of Unknown Function (DUF239)	te70600,te70601,te70602,te70603,te70604
Cluster_2688	scaffold_1	12517309	12518625	22.6898	844.797	1.4857	5.09507	7.66564	21.2315	Carubv10011089m.g	AT5G45320	0	0	te70610,te70611,te70612
Cluster_2689	scaffold_1	12518704	12519964	20.4512	1224.11	3.10336	12.7712	1.50114	0.280689	Carubv10011089m.g	AT5G45320	0	0	te70613,te70614,te70615
Cluster_2740	scaffold_1	12590394	12591651	106.405	0.576794	136.873	215.495	572.796	0.703395	NA	NA	NA	NA	NA
Cluster_2817	scaffold_1	12778799	12780286	135.9	460.169	40.1064	11.7248	13.5694	1.66508	Carubv10009644m.g	AT3G32960	0	Domain of unknown function (DUF1985)	te70875,te70876
Cluster_2886	scaffold_1	12882526	12883635	101.047	12.8561	14.1021	0	6.25294	27.423	NA	NA	NA	NA	te71012,te71013,te71014
Cluster_2921	scaffold_1	12944196	12944810	1058.32	725.607	1547.83	2.18218	1.02598	0.863288	NA	NA	NA	NA	NA
Cluster_2922	scaffold_1	12944998	12945535	3156.86	1394.12	4504.33	0	2.34564	7.56581	NA	NA	NA	NA	te71074
Cluster_2962	scaffold_1	13041585	13042221	38.5572	0.3797	3.07169	0	29.7164	0.833473	NA	NA	NA	NA	te38537
Cluster_2972	scaffold_1	13048712	13049615	31.6974	0.802663	8.65781	0	11.8657	1.76191	Carubv10012663m.g	AT1G80220	0	Protein of unknown function (DUF1644)	NA
Cluster_3038	scaffold_1	13118875	13120455	30.8112	58.1343	25.9899	0.848855	3.99101	35.9321	NA	NA	NA	NA	te38622,te38623,te38624,te38625,te38626,te38627
Cluster_3065	scaffold_1	13141497	13143533	25.3206	13.2986	22.5732	23.7179	26.6392	297.998	NA	NA	NA	NA	te38655,te38656,te38657
Cluster_3142	scaffold_1	13222284	13223138	1192.14	344.274	332.976	2197.49	1587.41	10.5564	NA	NA	NA	NA	NA
Cluster_3148	scaffold_1	13226822	13227881	72.6016	42.6694	24.9198	119.011	174.412	2.50435	Carubv10011066m.g	AT1G67270	0	Zinc-finger domain of monoamine-oxidase A repressor R1 protein	NA
Cluster_3224	scaffold_1	13298745	13301842	107.028	5.1528	26.5268	0	48.4741	2.51351	NA	NA	NA	NA	te38875,te38876,te38877
Cluster_3225	scaffold_1	13302089	13303041	61.8534	2.03038	24.638	0	38.4016	1.11421	NA	NA	NA	NA	te38879
Cluster_3247	scaffold_1	13326075	13326683	42.3465	3.17726	1.60646	0	4.14436	2.32478	NA	NA	NA	NA	te38901,te38902,te38903
Cluster_3248	scaffold_1	13326823	13328591	36.5614	0.683632	5.53043	0	7.8471	8.80369	NA	NA	NA	NA	te38905,te38906,te38907,te38908
Cluster_3258	scaffold_1	13363568	13364216	1045.76	361.872	783.872	190.243	1037.37	614.91	NA	NA	NA	NA	te38917
Cluster_3265	scaffold_1	13385471	13386727	51.7793	7.11946	24.1275	2.13531	20.0789	17.4581	NA	NA	NA	NA	te38929,te38930
Cluster_3286	scaffold_1	13410290	13411033	74.2771	3.25093	6.57482	0	5.08853	17.3644	NA	NA	NA	NA	te38959,te38960,te38961,te38962
Cluster_3287	scaffold_1	13411127	13411553	62.3131	0.566438	6.87353	0	13.2993	6.21689	NA	NA	NA	NA	te38962,te38963
Cluster_3310	scaffold_1	13438825	13439891	41.4337	0.680044	1.8338	0	2.36543	1.65861	NA	NA	NA	NA	NA
Cluster_3353	scaffold_1	13479981	13480639	50.3146	6.97346	11.8766	0	10.5323	1.87985	NA	NA	NA	NA	NA
Cluster_3438	scaffold_1	13577939	13578745	80.1452	3.29685	19.3969	4.989	10.9463	52.6317	NA	NA	NA	NA	te39126,te39127
Cluster_3449	scaffold_1	13595353	13596356	22.0168	3.61358	9.74435	0	20.1109	0.881345	NA	NA	NA	NA	te39137
Cluster_3550	scaffold_1	13685674	13686391	530.786	1.0106	5.45032	0	13.182	0	NA	NA	NA	NA	te39237
Cluster_3551	scaffold_1	13687727	13688634	337.217	0.266376	7.54221	0	11.1186	1.94905	NA	NA	NA	NA	te39238
Cluster_3564	scaffold_1	13701016	13701349	107.853	86.1749	8.78742	4.01809	15.1132	1.05973	NA	NA	NA	NA	NA
Cluster_3568	scaffold_1	13703534	13704264	92.9576	74.4467	8.03009	0	5.17903	0.968395	NA	NA	NA	NA	te39258,te39259,te39260,te39261,te39262
Cluster_3570	scaffold_1	13704576	13705246	156.175	189.242	13.1222	0	1.88071	0.263747	NA	NA	NA	NA	NA
Cluster_3572	scaffold_1	13706259	13707162	249.957	278.524	59.5225	11.8765	20.2416	0.391536	Carubv10011402m.g	AT3G32960	0	Domain of unknown function (DUF1985)	NA
Cluster_3574	scaffold_1	13707692	13708274	42.8307	1.24461	13.4248	4.60391	15.1521	2.42846	Carubv10011402m.g	AT3G32960	0	Domain of unknown function (DUF1985)	te39269
Cluster_3577	scaffold_1	13711145	13711588	59.9273	5.4475	4.4069	0	18.4746	5.18167	NA	NA	NA	NA	te39272,te39273
Cluster_3579	scaffold_1	13715354	13715739	176.041	265.053	48.1563	0	6.53863	0	Carubv10009721m.g	AT3G32960	0	Domain of unknown function (DUF1985)	te39279
Cluster_3580	scaffold_1	13716004	13716776	601.05	3332.04	154.407	53.8205	65.3017	1.83156	Carubv10009721m.g	AT3G32960	0	Domain of unknown function (DUF1985)	te39281
Cluster_3582	scaffold_1	13717807	13718279	74.4272	8.18162	12.4101	0	6.66996	3.74152	NA	NA	NA	NA	te39284
Cluster_3586	scaffold_1	13722273	13722919	175.887	220.561	28.73	0	6.82666	6.2912	NA	NA	NA	NA	te39288,te39289
Cluster_3587	scaffold_1	13723107	13723750	150.646	316.608	62.2852	2.08391	4.8989	1.37402	NA	NA	NA	NA	NA
Cluster_3590	scaffold_1	13724861	13725537	57.4419	15.0052	2.8902	0	10.2522	7.31946	NA	NA	NA	NA	te39293,te39294
Cluster_3591	scaffold_1	13725657	13726936	145.831	1.32272	18.3437	2.09694	20.704	1.93565	NA	NA	NA	NA	te39295,te39296,te39297,te39298
Cluster_3592	scaffold_1	13727096	13727502	87.5022	1.78282	9.61506	0	17.0535	0	NA	NA	NA	NA	te39299
Cluster_3596	scaffold_1	13728744	13729528	44.8459	1.54057	3.73885	0	28.1328	1.12722	NA	NA	NA	NA	te39305
Cluster_3597	scaffold_1	13729607	13730618	48.9439	2.62901	10.6341	0	36.1628	1.04925	NA	NA	NA	NA	te39307
Cluster_3660	scaffold_1	13795388	13796241	29.7186	0.283219	8.01912	0	21.4267	2.69399	NA	NA	NA	NA	NA
Cluster_3792	scaffold_1	13929605	13930116	47.9706	293.833	43.9485	0	3.69714	0.691305	NA	NA	NA	NA	NA
Cluster_3810	scaffold_1	13944295	13947036	80.6159	1.14672	3.21116	0.978877	3.68186	3.16256	NA	NA	NA	NA	te39520,te39521,te39522,te39523,te39524,te39525,te39526,te39527,te39528
Cluster_3829	scaffold_1	13960629	13961346	38.7685	3.70552	2.72516	1.86914	9.6668	18.4862	Carubv10011833m.g	AT3G26800	0	0	te39545
Cluster_3835	scaffold_1	13973512	13973767	337.393	15.1168	84.0755	62.9081	157.745	33.874	NA	NA	NA	NA	te30890,te30891
Cluster_3840	scaffold_1	13978828	13979059	160.564	10.4254	54.8204	34.7079	95.1907	26.6987	NA	NA	NA	NA	te30900,te30901
Cluster_3841	scaffold_1	13979294	13980732	261.426	21.0102	63.2279	36.3722	121.46	49.4396	NA	NA	NA	NA	te30902,te30903,te30904
Cluster_3842	scaffold_1	13981004	13981392	197.835	13.679	47.7849	31.0498	97.3231	35.0309	NA	NA	NA	NA	te30903,te30904,te30905
Cluster_3851	scaffold_1	13993213	13993603	1388.23	100.212	290.247	185.346	740.713	229.025	NA	NA	NA	NA	te30922
Cluster_3852	scaffold_1	13993883	13994414	91.565	14.0939	25.7456	32.7942	68.7908	53.8906	NA	NA	NA	NA	te30922
Cluster_3853	scaffold_1	13995670	13996510	421.518	31.0605	82.5941	60.6392	216.828	68.1803	NA	NA	NA	NA	te30922,te30923
Cluster_3871	scaffold_1	14022737	14022992	92.7432	4.72401	26.7513	20.9694	34.5066	25.5783	NA	NA	NA	NA	te30931,te30932
Cluster_3874	scaffold_1	14024416	14024566	162.655	4.80535	51.8322	0	29.2506	33.9884	NA	NA	NA	NA	te30932
Cluster_3878	scaffold_1	14029769	14030473	50.5155	3.77384	13.8771	1.9036	12.5301	13.8065	NA	NA	NA	NA	te30934
Cluster_3884	scaffold_1	14041936	14042526	89.3504	11.0499	34.7631	9.08318	38.4352	46.4145	NA	NA	NA	NA	te30936,te30937
Cluster_3886	scaffold_1	14042806	14043546	52.4807	3.5905	15.8434	7.24448	22.9911	9.55326	NA	NA	NA	NA	te30936,te30937
Cluster_3887	scaffold_1	14043713	14044419	68.9004	11.2895	37.3621	17.084	39.2688	23.2795	NA	NA	NA	NA	te30936,te30937,te30938
Cluster_3889	scaffold_1	14047032	14047348	69.7314	7.62994	27.776	0	17.9142	11.1656	NA	NA	NA	NA	te30938,te30939
Cluster_3904	scaffold_1	14055064	14055713	118.396	16.7448	46.659	30.9702	41.7416	37.573	NA	NA	NA	NA	te30941
Cluster_3909	scaffold_1	14058795	14060261	72.829	8.07879	16.6723	18.2964	53.3342	36.7942	NA	NA	NA	NA	te30942,te30941
Cluster_3910	scaffold_1	14060463	14061566	44.8653	4.81985	19.4958	9.72493	21.7184	21.4806	NA	NA	NA	NA	te30942
Cluster_3944	scaffold_1	14106043	14107003	58.7827	0.50337	2.03607	0	4.59609	14.7325	NA	NA	NA	NA	te30984,te30983
Cluster_3945	scaffold_1	14107405	14108004	77.7764	2.01558	11.4139	2.23673	8.41304	22.4167	NA	NA	NA	NA	te30984
Cluster_3969	scaffold_1	14137620	14138760	30.8537	0.84792	6.00204	0	4.42404	0.465313	NA	NA	NA	NA	te31008,te31009
Cluster_3988	scaffold_1	14154011	14154681	33.5532	14.058	30.6185	0	40.4353	8.70364	NA	NA	NA	NA	te31028
Cluster_4042	scaffold_1	14201675	14202057	157.113	9.47268	30.6527	38.5442	113.675	22.6416	NA	NA	NA	NA	te31075,te31076
Cluster_4055	scaffold_1	14217164	14218361	63.8968	1.41326	4.89983	0	11.0606	9.74983	NA	NA	NA	NA	te31097,te31098,te31099,te31100,te31101
Cluster_4059	scaffold_1	14224139	14224757	44.3076	1.95371	11.0635	6.50424	11.2129	33.7366	NA	NA	NA	NA	te31110
Cluster_4067	scaffold_1	14235798	14236872	27.4169	4.49989	7.28062	0	5.28261	24.2002	NA	NA	NA	NA	te31135,te31136
Cluster_4090	scaffold_1	14254190	14254816	71.1628	1.54302	14.0431	0	10.0634	9.59668	NA	NA	NA	NA	te31158,te31159,te31160
Cluster_4091	scaffold_1	14254928	14256071	20.3959	1.26854	14.5382	0	10.4795	0	NA	NA	NA	NA	te31162
Cluster_4109	scaffold_1	14276645	14277268	194.835	1124.85	40.7639	36.562	38.4249	1.70167	NA	NA	NA	NA	te31191,te31192
Cluster_4112	scaffold_1	14278797	14279173	179.158	351.576	12.9752	0	1.67368	0.469427	NA	NA	NA	NA	te31195,te31196
Cluster_4115	scaffold_1	14279987	14281237	101.765	81.7831	15.6408	1.07277	6.05255	0.707331	NA	NA	NA	NA	te31198,te31199,te31200,te31201,te31202
Cluster_4116	scaffold_1	14281317	14281847	74.0067	60.1256	9.21217	7.58215	13.0711	0.333285	NA	NA	NA	NA	te31203
Cluster_4117	scaffold_1	14282025	14282625	355.541	1559.07	102.554	73.6894	76.6413	4.12253	NA	NA	NA	NA	te31204,te31205
Cluster_4119	scaffold_1	14283476	14284563	28.9705	98.037	9.89123	1.23349	4.0596	11.7115	NA	NA	NA	NA	te31206,te31207,te31208,te31209
Cluster_4127	scaffold_1	14289798	14290164	66.9236	0.659044	10.663	0	22.3507	3.37553	NA	NA	NA	NA	NA
Cluster_4128	scaffold_1	14290275	14291698	55.7681	3.05733	3.43516	0	10.6345	7.20822	NA	NA	NA	NA	te31226,te31227,te31228
Cluster_4131	scaffold_1	14293398	14294111	32.6792	2.37127	13.7021	1.87961	15.907	23.547	NA	NA	NA	NA	te31234,te31235
Cluster_4132	scaffold_1	14294222	14296058	55.9318	11.4549	24.4983	0.730561	22.3264	3.08284	NA	NA	NA	NA	te31236,te31237,te31238,te31239
Cluster_4133	scaffold_1	14296296	14297229	31.9941	1.03584	1.04747	1.43687	9.45792	0.757919	NA	NA	NA	NA	te31241
Cluster_4134	scaffold_1	14297304	14297965	34.6277	5.11506	11.8228	0	25.7348	1.60399	NA	NA	NA	NA	NA
Cluster_4197	scaffold_1	14369822	14373132	133.771	7.15892	23.3429	0	27.2515	3.63462	NA	NA	NA	NA	te31301,te31302,te31303,te31304
Cluster_4203	scaffold_1	14376875	14377898	51.5684	4.48781	1.91081	6.55293	27.1123	6.39457	NA	NA	NA	NA	te31310,te31311
Cluster_4209	scaffold_1	14382904	14383964	51.6992	4.3313	2.76626	3.79465	20.2198	1.33439	NA	NA	NA	NA	te31311
Cluster_4335	scaffold_1	14526093	14526672	52.9331	2.08508	25.3017	0	19.5821	2.13589	NA	NA	NA	NA	NA
Cluster_4368	scaffold_1	14552387	14554550	44.2642	1.34123	9.49399	0	13.1211	5.80645	Carubv10010556m.g	AT3G24515	UBC37	ubiquitin-conjugating enzyme 37	te31481
Cluster_4369	scaffold_1	14554625	14556126	43.6058	2.41547	9.7703	1.787	8.82193	6.83389	Carubv10010556m.g	AT3G24515	UBC37	ubiquitin-conjugating enzyme 37	te31482,te31483
Cluster_4371	scaffold_1	14556508	14557951	33.1675	2.84749	8.13019	0.929391	13.109	15.81	NA	NA	NA	NA	te31485,te31486
Cluster_4396	scaffold_1	14590600	14591564	29.2695	1.75449	6.0829	0	4.57704	13.5711	NA	NA	NA	NA	te31517,te31518
Cluster_4439	scaffold_1	14638491	14638808	127.439	3.04238	15.3826	0	19.8421	0	NA	NA	NA	NA	te31597
Cluster_4451	scaffold_1	14664504	14665018	56.4346	3.75719	7.5987	0	6.126	11.3401	NA	NA	NA	NA	te31650,te31651
Cluster_4518	scaffold_1	14745705	14746180	50.7387	0	0	0	15.907	3.71794	NA	NA	NA	NA	te31801,te31800
Cluster_4612	scaffold_1	14882121	14883517	106.073	146.645	114.851	1026.94	1138.65	8.99439	NA	NA	NA	NA	te32022,te32023,te32024,te32025
Cluster_4634	scaffold_1	14908206	14908877	261.326	475.46	119.38	0	0	1.05342	NA	NA	NA	NA	NA
Cluster_4656	scaffold_1	14944677	14945129	197.897	112.659	58.3112	0	2.78578	1.95336	Carubv10010810m.g	0	0	0	te32116
Cluster_4658	scaffold_1	14945787	14946619	146.933	313.878	364.085	1151.93	948.361	11.8974	NA	NA	NA	NA	te32121
Cluster_4668	scaffold_1	14966575	14967366	425.372	635.823	345.875	3.38899	4.78014	1.34071	NA	NA	NA	NA	te32154
Cluster_4669	scaffold_1	14967461	14968106	502.499	727.479	424.045	0	0.976746	1.91768	NA	NA	NA	NA	NA
Cluster_4755	scaffold_1	15062313	15063369	21.6874	2.05943	9.25575	0	8.35733	18.7522	Carubv10011285m.g	AT3G32960	0	Domain of unknown function (DUF1985)	te92148,te92149
Cluster_4767	scaffold_1	15080833	15082775	104.707	3.36102	16.1125	0	25.9795	8.56179	NA	NA	NA	NA	te92187,te92188,te92189
Cluster_4769	scaffold_1	15083250	15084365	39.2477	1.73383	7.01314	1.20255	16.9618	1.74437	NA	NA	NA	NA	te92191,te92192
Cluster_4785	scaffold_1	15099004	15100894	56.4993	1.53486	4.65626	0	8.00818	5.05373	NA	NA	NA	NA	te92226,te92227
Cluster_4811	scaffold_1	15130429	15130904	79.1179	18.8007	92.4895	2.81941	35.7908	597.102	NA	NA	NA	NA	NA
Cluster_4819	scaffold_1	15143064	15143194	740.579	134.782	940.992	0	77.066	202.642	NA	NA	NA	NA	te92299
Cluster_4892	scaffold_1	15224510	15225275	33.6671	2.21029	1.2772	0	2.47119	4.15866	NA	NA	NA	NA	te92406,te92407,te92408
Cluster_4935	scaffold_1	15300679	15301292	46.6685	64.6035	46.2079	0	1.02765	6.62932	NA	NA	NA	NA	te92507
Cluster_4937	scaffold_1	15301945	15302382	778.511	790.216	674.558	6.12804	0	3.63645	NA	NA	NA	NA	te92510
Cluster_5045	scaffold_1	15420789	15422396	25.7116	9.47621	17.6441	15.8574	26.2908	65.7049	Carubv10012509m.g	AT4G35725	0	0	te92665,te92666,te92667
Cluster_5060	scaffold_1	15449416	15449880	204.235	440.046	307.175	0	1.35694	12.1789	NA	NA	NA	NA	te92690
Cluster_5061	scaffold_1	15449967	15450528	926.499	1080.66	1028.82	0	1.12274	8.18741	NA	NA	NA	NA	te92691
Cluster_5065	scaffold_1	15456213	15456639	55.6025	112.721	247.447	625.447	599.946	125.581	NA	NA	NA	NA	NA
Cluster_5155	scaffold_1	15618401	15619147	132.614	7.12332	14.4065	3.59315	7.60215	38.6168	NA	NA	NA	NA	te92894
Cluster_5162	scaffold_1	15646101	15646283	145.397	22.4687	261.958	0	6.89594	386.829	NA	NA	NA	NA	NA
Cluster_5179	scaffold_1	15698833	15699266	598.933	2804.9	723.606	0	1.45387	0.407774	NA	NA	NA	NA	NA
Cluster_5180	scaffold_1	15699472	15699807	219.294	1320.2	238.76	0	0	0	NA	NA	NA	NA	te92996
Cluster_5181	scaffold_1	15699891	15700998	997.881	3920.11	1054.27	6.05614	2.2779	1.43752	NA	NA	NA	NA	te92998,te92999
Cluster_5190	scaffold_1	15721360	15721611	89.3421	28.7939	3.88227	0	0	0	NA	NA	NA	NA	NA
Cluster_5227	scaffold_1	15828741	15828954	177.895	16.9534	182.866	0	35.382	253.056	NA	NA	NA	NA	te93158
Cluster_5250	scaffold_1	15920509	15921597	33.8305	2.44312	3.59351	0	4.05587	15.1135	NA	NA	NA	NA	te93261
Cluster_5370	scaffold_1	16224357	16225444	36.4953	15.7837	18.8833	0	58.5743	0.16266	NA	NA	NA	NA	te45081,te45082,te45083
Cluster_5374	scaffold_1	16226130	16227222	23.9692	4.86836	8.05581	0	23.6689	1.29533	NA	NA	NA	NA	te45083
Cluster_5396	scaffold_1	16266977	16267094	416.288	45.0942	1119.28	1262.43	1026.68	26.9961	NA	NA	NA	NA	NA
Cluster_5404	scaffold_1	16302641	16303553	24.6596	1451.74	1.07156	1.46992	2.07331	33.7278	NA	NA	NA	NA	te45159,te45160
Cluster_5427	scaffold_1	16360050	16362048	3703.8	1606.21	3988.21	5.37085	2.84082	8.85313	Carubv10011462m.g	AT5G04970	0	Plant invertase/pectin methylesterase inhibitor superfamily	te45227
Cluster_5428	scaffold_1	16362189	16362944	780.255	398.956	1090.92	1.77519	1.66925	0.234093	Carubv10011462m.g	AT5G04970	0	Plant invertase/pectin methylesterase inhibitor superfamily	te45228
Cluster_5469	scaffold_1	16555670	16556106	208.89	38.1899	772.368	1185.42	2379.52	0	NA	NA	NA	NA	NA
Cluster_5472	scaffold_1	16560610	16561003	86.2335	6.75269	24.8308	0	150.538	259.622	NA	NA	NA	NA	NA
Cluster_5526	scaffold_1	16771280	16773424	33.206	171.056	6.84149	0.62566	0.294162	0.0825054	Carubv10008947m.g	AT1G48900	0	Signal recognition particle, SRP54 subunit protein	te45468,te45469
Cluster_5527	scaffold_1	16773588	16775578	4377.43	10239.5	2771.86	10.1108	5.70447	0.088887	Carubv10011966m.g	AT1G48910	YUC10	Flavin-containing monooxygenase family protein	te45470
Cluster_5528	scaffold_1	16775785	16778764	865.403	2741.56	366.382	3.15244	1.27043	0.0593873	Carubv10011966m.g, Carubv10012646m.g	AT1G48910, AT1G32660	YUC10, 0	Flavin-containing monooxygenase family protein, F-box and associated interaction domains-containing protein	te45471
Cluster_5603	scaffold_1	17069360	17070840	100.61	2.44972	21.1389	0	6.81678	45.5281	NA	NA	NA	NA	te23053,te23054,te23055
Cluster_5702	scaffold_1	17432686	17432946	100.377	0	123.697	0	16.9228	37.9715	NA	NA	NA	NA	te23235
Cluster_5763	scaffold_1	17648033	17649143	751.272	0	635.784	1.20796	2.27175	0.159293	NA	NA	NA	NA	te23369,te23370
Cluster_5872	scaffold_1	17985435	17985967	52.9927	1.36136	47.7236	0	37.8824	375.198	NA	NA	NA	NA	te2739
Cluster_5943	scaffold_1	18232920	18233377	135.854	0	134.574	0	4.13304	0	NA	NA	NA	NA	NA
Cluster_5983	scaffold_1	18383860	18385824	52.705	4.18501	40.8261	131.814	210.647	4.77335	NA	NA	NA	NA	te3014
Cluster_6049	scaffold_1	18549519	18550223	39.4833	2.40154	20.8156	1.9036	17.0051	220.904	NA	NA	NA	NA	te3169
Cluster_6061	scaffold_1	18626664	18628203	34.5555	12.5646	17.7879	0.871455	9.01397	124.571	NA	NA	NA	NA	te3203,te3204,te3205,te3206,te3207,te3208
Cluster_6070	scaffold_1	18665262	18665669	519.713	7.1138	477.177	651.284	1348.56	308.403	Carubv10008627m.g	AT1G53200	0	0	te3233,te3234
Cluster_6120	scaffold_1	18809790	18810365	868.446	1838.79	373.669	2.32993	1.09545	0	Carubv10010481m.g	AT1G53530	0	Peptidase S24/S26A/S26B/S26C family protein	te3320
Cluster_6121	scaffold_1	18810454	18811721	1169.29	1613.54	763.069	1.05839	1.99047	0.139569	NA	NA	NA	NA	te3321
Cluster_6200	scaffold_1	19148341	19149788	20.0717	2.33851	15.5398	0.926824	9.58668	89.3426	NA	NA	NA	NA	te52176
Cluster_6327	scaffold_2	29500	29912	56.4962	2.9282	2.36884	9.74848	21.3891	20.5684	NA	NA	NA	NA	te77563
Cluster_6414	scaffold_2	374878	375615	700.553	1817.3	87.4932	7.27393	0.854984	1.43881	NA	NA	NA	NA	te77767
Cluster_6415	scaffold_2	375890	377035	210.39	430.341	27.3182	0	1.10118	168.172	Carubv10020775m.g	AT1G63900	0	E3 Ubiquitin ligase family protein	te77768,te77769
Cluster_6493	scaffold_2	682774	682950	890.393	4.09948	436.657	0	3.56485	0	NA	NA	NA	NA	NA
Cluster_6497	scaffold_2	699671	700323	154.838	209.645	182.782	0	0	0	NA	NA	NA	NA	te77962
Cluster_6498	scaffold_2	700843	701334	1441.87	766.41	1724.01	0	0	2.51792	NA	NA	NA	NA	NA
Cluster_6500	scaffold_2	702291	702866	653.822	718.049	980.031	2.32993	0	0	NA	NA	NA	NA	NA
Cluster_6566	scaffold_2	986788	987117	81.8699	0	56.3283	0	0	0	NA	NA	NA	NA	NA
Cluster_6614	scaffold_2	1140686	1141223	61.6307	1.34871	12.7292	0	3.51847	28.2895	NA	NA	NA	NA	te57481
Cluster_6628	scaffold_2	1154006	1154711	35.3687	3.7685	41.5722	3.80181	8.04363	224.1	NA	NA	NA	NA	te57485
Cluster_6700	scaffold_2	1501026	1501457	116.551	351.046	108.704	0	1.4606	6.14493	NA	NA	NA	NA	te57788
Cluster_6748	scaffold_2	1738671	1739147	102.123	61.8617	55.3773	64.7105	325.41	285.31	NA	NA	NA	NA	NA
Cluster_6825	scaffold_2	1988134	1988629	174.964	176.038	78.8978	0	2.54427	12.1313	NA	NA	NA	NA	te58105,te58106,te58107
Cluster_6827	scaffold_2	1989274	1991440	3079.66	3288.28	2234.32	1.23862	0.582352	0	Carubv10021687m.g	AT1G60410	0	F-box family protein	NA
Cluster_6835	scaffold_2	2035668	2037980	1581.47	6089.18	790.111	9.28346	1.63678	0.0765128	Carubv10020348m.g	AT1G60410	0	F-box family protein	te17673
Cluster_6857	scaffold_2	2115351	2115722	414.851	26.0074	405.009	3679.79	3042.94	3.80589	NA	NA	NA	NA	te17731,te17732
Cluster_6899	scaffold_2	2217723	2218604	4958.6	1376.62	8501.07	10651.1	7995.25	363.178	NA	NA	NA	NA	NA
Cluster_6953	scaffold_2	2400305	2401268	36.5187	11.0397	18.2676	0	14.3999	49.5674	NA	NA	NA	NA	te17995,te17996
Cluster_6985	scaffold_2	2520524	2520945	75.6617	63.6196	88.0963	12.7208	29.9042	87.6483	Carubv10019746m.g	AT1G59610	ADL3,CF1,DL3,DRP2B	dynamin-like 3	NA
Cluster_7012	scaffold_2	2652643	2653045	470.295	30.0086	121.381	73.2628	247.381	54.0144	NA	NA	NA	NA	te18198,te18199
Cluster_7017	scaffold_2	2659054	2660210	21.5819	2.71763	4.22789	1.15993	15.27	1.07072	NA	NA	NA	NA	te18209,te18210
Cluster_7038	scaffold_2	2714355	2715020	3634.36	1497.34	549.394	4.03015	0.947415	0.531454	NA	NA	NA	NA	te18253
Cluster_7055	scaffold_2	2748634	2749872	26.7613	504.431	7.10653	2.16633	6.62043	8.42734	Carubv10020211m.g	AT1G58340	ZF14	MATE efflux family protein	te18287,te18288,te18289
Cluster_7058	scaffold_2	2750656	2751640	55.2726	9.82209	32.7766	0	14.0929	179.13	NA	NA	NA	NA	te18293,te18294,te18295,te18296
Cluster_7101	scaffold_2	2895211	2895496	97.3278	21.1424	75.2564	0	17.6497	581.663	NA	NA	NA	NA	te18410
Cluster_7112	scaffold_2	2959387	2960599	665.825	1396.38	194.376	2.21276	1.04036	5.98181	NA	NA	NA	NA	te18445,te18446
Cluster_7169	scaffold_2	3034829	3035845	44.2757	92.7522	51.9469	112.167	221.494	30.6268	NA	NA	NA	NA	te71161
Cluster_7197	scaffold_2	3083368	3083774	4009.01	492.652	3641.71	0	6.20126	6.08756	NA	NA	NA	NA	te71228
Cluster_7259	scaffold_2	3215390	3215523	259.662	5.41498	584.079	20.0305	178.934	3843.24	NA	NA	NA	NA	te71346
Cluster_7322	scaffold_2	3375027	3375511	45.577	3.49089	175.495	8.30128	188.643	25.5427	NA	NA	NA	NA	te71539,te71538
Cluster_7330	scaffold_2	3403459	3404113	513.093	434.626	685.58	0	0	0.540379	NA	NA	NA	NA	te71581
Cluster_7378	scaffold_2	3472986	3473256	105.736	25.8827	72.2017	84.187	102.447	187.423	NA	NA	NA	NA	te71652
Cluster_7409	scaffold_2	3596181	3597866	61.6695	366.247	160.734	1619.05	1252.6	17.9493	NA	NA	NA	NA	te71794,te71795,te71796,te71797,te71798
Cluster_7419	scaffold_2	3618500	3618586	352.887	2.7801	629.731	0	7.25262	16.2735	NA	NA	NA	NA	NA
Cluster_7440	scaffold_2	3645732	3646247	3116.93	0.468739	3206.13	0	3126.77	1.02892	NA	NA	NA	NA	te71856
Cluster_7460	scaffold_2	3676878	3678170	2594.13	1710.67	3549.39	9160.75	29148.5	65.5612	NA	NA	NA	NA	te71895,te71896
Cluster_7503	scaffold_2	3760726	3761100	63.3127	120.612	13.0444	21.4726	26.9217	0	NA	NA	NA	NA	te72030,te72031,te72032
Cluster_7504	scaffold_2	3761195	3762066	66.1907	21.6351	20.1949	113.889	71.6363	4.6679	NA	NA	NA	NA	te72033,te72034,te72035
Cluster_7505	scaffold_2	3762222	3765566	58.0065	58.6415	21.0583	98.6971	82.81	1.11105	NA	NA	NA	NA	te72036,te72037,te72038,te72039,te72040,te72041
Cluster_7506	scaffold_2	3765648	3766106	81.1564	168.623	34.1031	125.725	93.4782	0.385565	NA	NA	NA	NA	NA
Cluster_7507	scaffold_2	3766192	3767862	41.1554	19.1064	10.5386	36.1411	36.2501	1.48273	NA	NA	NA	NA	te72042,te72043
Cluster_7508	scaffold_2	3767940	3768229	177.855	442.871	20.2414	64.7882	47.8673	1.83077	NA	NA	NA	NA	te72044
Cluster_7509	scaffold_2	3768526	3768695	941.504	1577.84	97.8333	110.521	129.907	3.12307	NA	NA	NA	NA	NA
Cluster_7528	scaffold_2	3801247	3802728	17.9539	960.948	2.64057	0.90556	0.425761	0.716494	Carubv10021382m.g	AT1G55010	PDF1.5	plant defensin 1.5	te72109,te72110
Cluster_7567	scaffold_2	3840566	3844151	63.9252	2.96772	4.63794	0	9.32567	2.61562	NA	NA	NA	NA	te72149,te72150,te72151,te72152,te72153
Cluster_7580	scaffold_2	3857381	3857648	311.594	867.299	259.185	0	0	1.3207	NA	NA	NA	NA	NA
Cluster_7616	scaffold_2	3901484	3902016	67.5849	65.7993	416.663	214.021	234.397	1.32814	NA	NA	NA	NA	te72235
Cluster_7623	scaffold_2	3908411	3908837	51.7678	2.26575	4.58236	0	7.3885	10.3615	NA	NA	NA	NA	te72243,te72244
Cluster_7624	scaffold_2	3909655	3909807	211.363	4.74253	6.39433	0	37.1164	54.3646	NA	NA	NA	NA	te72246,te72247
Cluster_7629	scaffold_2	3914587	3915345	196.854	68.8323	97.9622	564.046	495.472	4.43018	NA	NA	NA	NA	te72254
Cluster_7638	scaffold_2	3925186	3925641	54.7595	18.5645	38.6184	55.9184	55.349	0	NA	NA	NA	NA	te72261
Cluster_7639	scaffold_2	3925969	3926228	1158.77	194.426	417.673	2100.81	1805.57	4.08402	NA	NA	NA	NA	te72261
Cluster_7654	scaffold_2	3952832	3954218	20.6593	1.22068	2.11608	0	5.00415	31.3883	NA	NA	NA	NA	te72287,te72288,te72289
Cluster_7679	scaffold_2	3984261	3985062	35.2183	0.904747	1.21987	1.67337	3.93378	0.661998	NA	NA	NA	NA	te72333,te72334,te72335
Cluster_7708	scaffold_2	4023551	4023968	59.7376	2.89317	14.0431	3.21062	12.0761	9.31443	NA	NA	NA	NA	te54887,te54888,te54889,te54890
Cluster_7709	scaffold_2	4024052	4024464	65.4166	1.75692	0	3.24949	7.63896	3.85658	NA	NA	NA	NA	te54891,te54892
Cluster_7778	scaffold_2	4124618	4124972	88.7885	3.40661	2.75587	0	7.10961	6.97926	NA	NA	NA	NA	te54963
Cluster_7779	scaffold_2	4125069	4125466	57.5969	3.64627	4.91625	0	4.75612	4.44659	NA	NA	NA	NA	NA
Cluster_7792	scaffold_2	4148206	4149302	30.5986	2.42531	6.24278	7.34024	13.8044	23.2309	NA	NA	NA	NA	te54990,te54991,te54992
Cluster_7796	scaffold_2	4151939	4153951	847.168	1695.85	555.992	3.33343	6.26903	41.5841	NA	NA	NA	NA	te54994,te54995,te54996,te54997
Cluster_7797	scaffold_2	4154076	4157097	1714.2	1956.8	1420.56	3.10863	2.92313	8.84285	NA	NA	NA	NA	te54998,te54999,te55000
Cluster_7801	scaffold_2	4161363	4162971	18.3177	1.20258	1.82411	0	6.27449	5.71949	NA	NA	NA	NA	te55007
Cluster_7821	scaffold_2	4180606	4181715	227.17	40.0936	111.935	2231.9	1184.08	10.0445	NA	NA	NA	NA	te55036,te55037,te55038,te55039
Cluster_7823	scaffold_2	4194024	4194568	210.308	7.10074	10.7706	2.46246	8.10431	28.2509	NA	NA	NA	NA	te55049,te55050,te55051
Cluster_7979	scaffold_2	4373001	4373699	1008.44	275.433	1403.82	0	0.902687	7.34227	NA	NA	NA	NA	te55282,te55283
Cluster_8006	scaffold_2	4395669	4396765	105.976	9.03977	65.1033	117.444	266.886	31.7811	NA	NA	NA	NA	te55307,te55308,te55309
Cluster_8008	scaffold_2	4397135	4397331	145.454	2.45552	84.4247	238.434	528.484	36.8322	NA	NA	NA	NA	te55309
Cluster_8009	scaffold_2	4397458	4398239	379.512	92.7887	412.851	859.798	1801.76	186.026	NA	NA	NA	NA	NA
Cluster_8012	scaffold_2	4398830	4400818	696.038	196.997	487.937	927.755	1779.68	136.579	NA	NA	NA	NA	te55310
Cluster_8020	scaffold_2	4415088	4415763	59.3435	48.6601	121.568	0	0	0.785388	NA	NA	NA	NA	te55332
Cluster_8021	scaffold_2	4415840	4416624	664.867	601.746	803.853	0	0	1.12722	NA	NA	NA	NA	te55333
Cluster_8035	scaffold_2	4435757	4436612	29.6491	12.4325	115.434	87.797	146.688	4.5484	NA	NA	NA	NA	te55359
Cluster_8050	scaffold_2	4451932	4452658	34.3471	40.5888	158.794	378.43	629.242	2.19088	NA	NA	NA	NA	te55399,te55400,te55401,te55402,te55403
Cluster_8072	scaffold_2	4493883	4494912	24.6404	0.939297	4.74919	0	7.9638	2.23365	NA	NA	NA	NA	te54281
Cluster_8079	scaffold_2	4500735	4501361	56.1468	0	4.68102	0	7.04441	5.0806	Carubv10021848m.g	AT1G05080	0	F-box/RNI-like/FBD-like domains-containing protein	te54288
Cluster_8101	scaffold_2	4519904	4520915	38.0226	11.2331	76.3718	26.5225	72.9491	1.399	NA	NA	NA	NA	te54313,te54314
Cluster_8111	scaffold_2	4533900	4534494	38.527	21.9511	128.252	85.7101	226.94	0.297435	NA	NA	NA	NA	te54327
Cluster_8114	scaffold_2	4537162	4538481	29.4608	0.183234	2.22348	0	8.60425	5.22878	NA	NA	NA	NA	te54330,te54331
Cluster_8121	scaffold_2	4541732	4542615	88.4454	8.20823	97.3906	10.627	63.5261	98.8973	NA	NA	NA	NA	te54332,te54333,te54334
Cluster_8131	scaffold_2	4559848	4561127	18.5486	1.32272	0	0	4.92952	9.12523	NA	NA	NA	NA	te54343,te54344
Cluster_8211	scaffold_2	4670002	4675623	11.7227	11.0136	9.39701	118.879	67.6769	99.6306	NA	NA	NA	NA	te54487,te54488,te54489
Cluster_8443	scaffold_2	5085128	5085679	47.4608	0.438169	5.31703	0	11.4308	2.24424	NA	NA	NA	NA	te19118,te19119
Cluster_8546	scaffold_2	5254463	5254974	43.9731	1.4172	5.73242	0	6.1619	12.0978	NA	NA	NA	NA	te19328
Cluster_8560	scaffold_2	5279349	5280163	28.1271	2.0774	9.60327	1.64668	10.8389	19.9774	NA	NA	NA	NA	te19344
Cluster_8575	scaffold_2	5294601	5295865	31.0652	0.764803	3.09354	0	5.98556	0.419701	NA	NA	NA	NA	te19368
Cluster_8630	scaffold_2	5393286	5394895	16.5265	0.751146	2.43064	0.833566	4.70294	1.31906	NA	NA	NA	NA	te19436,te19437
Cluster_8638	scaffold_2	5404093	5406242	19.4203	1.01248	4.09535	1.24841	6.45652	3.78642	NA	NA	NA	NA	te19444,te19445
Cluster_8641	scaffold_2	5408822	5410082	61.3537	1.72627	8.53423	4.25707	6.50493	7.85928	NA	NA	NA	NA	te19449
Cluster_8678	scaffold_2	5456391	5456723	136.45	5.08434	5.87587	4.03015	15.1586	4.25163	NA	NA	NA	NA	te19500
Cluster_8790	scaffold_2	5570175	5572344	24.146	0.668762	3.15591	3.09226	9.88629	5.54573	NA	NA	NA	NA	te19626,te19627,te19628,te19625
Cluster_8980	scaffold_2	5788738	5789399	36.4828	0.365361	0	2.02725	1.90628	4.81198	NA	NA	NA	NA	te19925
Cluster_8983	scaffold_2	5790919	5791873	9337.88	1292.16	6362.75	14494	11146.2	1.48251	NA	NA	NA	NA	te19926,te19927,te19928,te19929
Cluster_9026	scaffold_2	5833955	5835420	1937.01	278.166	1636.34	2571.48	2533.38	1.08647	NA	NA	NA	NA	te19983
Cluster_9040	scaffold_2	5846091	5847618	2052.64	58.8844	865.645	1337.65	1333.4	0.347462	NA	NA	NA	NA	te20006
Cluster_9094	scaffold_2	5909767	5910661	25.6129	4.32392	12.0242	0	30.3152	12.0619	NA	NA	NA	NA	te20080,te20081,te20082,te20083,te20084,te20085
Cluster_9103	scaffold_2	5920129	5920671	2030.92	235.633	1497.23	2172.47	2248.51	0.977758	NA	NA	NA	NA	te20096
Cluster_9104	scaffold_2	5920903	5921501	4871.19	291.939	2392.75	7321.85	6538.37	0.886348	NA	NA	NA	NA	te20096
Cluster_9115	scaffold_2	5939785	5940070	1455.62	117.552	632.838	1379.58	1577.45	6.8067	NA	NA	NA	NA	te20116
Cluster_9116	scaffold_2	5940297	5941370	2153.85	205.386	1290.78	3637.5	2566.21	1.6478	NA	NA	NA	NA	te20116,te20117
Cluster_9151	scaffold_2	5972602	5973877	2245.33	164.153	1231.35	3058.51	2723.19	0.138694	NA	NA	NA	NA	te20170
Cluster_9163	scaffold_2	5984250	5985825	3427.26	124.004	1552.54	4769.52	4936.52	0.786053	NA	NA	NA	NA	te20185,te20186
Cluster_9195	scaffold_2	6018804	6019563	84.0243	0	15.4474	0	24.907	23.2861	NA	NA	NA	NA	te63319,te63320,te63321,te63322
Cluster_9207	scaffold_2	6039085	6040438	27.814	2.1436	11.5608	0	11.6503	7.18876	NA	NA	NA	NA	te63357,te63358,te63359,te63360,te63361
Cluster_9235	scaffold_2	6082543	6083729	33.4515	0.203765	0	0	11.1631	0	NA	NA	NA	NA	NA
Cluster_9299	scaffold_2	6174393	6176527	13.4213	1.58603	4.58236	0	10.935	1.82362	NA	NA	NA	NA	te63526
Cluster_9421	scaffold_2	6454083	6454637	73.0191	0.8716	17.6276	2.41809	9.09518	11.7983	NA	NA	NA	NA	te63839,te63840
Cluster_9496	scaffold_2	6631617	6632786	19.2429	0.206726	5.85327	1.14704	6.47157	11.042	NA	NA	NA	NA	te64032,te64033,te64034
Cluster_9497	scaffold_2	6632965	6633812	37.6524	0.285223	9.22956	0	19.346	5.63479	NA	NA	NA	NA	te64035
Cluster_9515	scaffold_2	6646733	6647902	22.3918	0.206726	10.8704	0	5.39298	39.6301	NA	NA	NA	NA	te64048,te64049
Cluster_9527	scaffold_2	6677973	6678157	163.74	3.9222	10.5766	0	17.0535	0.956617	NA	NA	NA	NA	NA
Cluster_9552	scaffold_2	6779843	6780022	177.385	4.03115	0	0	7.01087	5.89914	NA	NA	NA	NA	te64233
Cluster_9563	scaffold_2	6805236	6805829	344.57	42.7546	100.469	668.761	578.928	0	NA	NA	NA	NA	NA
Cluster_9570	scaffold_2	6821366	6821947	131.526	24.5194	50.4295	119.907	142.024	0	NA	NA	NA	NA	NA
Cluster_9573	scaffold_2	6830886	6832354	82.7616	128.591	837.144	440.343	733.206	20.9622	NA	NA	NA	NA	te64293,te64294
Cluster_9641	scaffold_2	6992406	6993674	27.7416	0	3.08379	0	8.45282	3.90487	NA	NA	NA	NA	te20198,te20199,te20200,te20201
Cluster_9674	scaffold_2	7083341	7084586	23.9827	816.454	3.14072	4.30832	4.55763	1.42034	Carubv10022433m.g	AT1G61320	0	FBD / Leucine Rich Repeat domains containing protein	te20283
Cluster_9686	scaffold_2	7098279	7099657	318.812	26.3092	97.9042	275.415	218.257	0.898346	NA	NA	NA	NA	NA
Cluster_9692	scaffold_2	7106400	7107306	437.783	38.6671	327.909	432.057	409.753	0.19512	NA	NA	NA	NA	NA
Cluster_9769	scaffold_2	7218637	7218990	82.1011	51.2435	392.439	432.183	511.556	1.99971	NA	NA	NA	NA	NA
Cluster_9776	scaffold_2	7224513	7224628	395.234	223.103	2479.57	4431.05	3720.6	0	NA	NA	NA	NA	NA
Cluster_9779	scaffold_2	7227905	7228573	241.694	197.038	1746.08	3019.09	2837.04	1.32268	NA	NA	NA	NA	NA
Cluster_9827	scaffold_2	7349576	7349888	95.4713	60.2741	112.524	4.28767	2.0159	0	NA	NA	NA	NA	te20612
Cluster_9828	scaffold_2	7350045	7350231	1212.72	527.714	1224.22	0	10.1226	37.8554	NA	NA	NA	NA	te20613
Cluster_9829	scaffold_2	7350639	7351323	53.7831	85.4486	47.1314	0	10.1325	3.10028	NA	NA	NA	NA	te20613
Cluster_9840	scaffold_2	7378475	7380539	157.198	0	188.086	0.649899	3.05558	27.0818	NA	NA	NA	NA	te20656,te20657
Cluster_9856	scaffold_2	7421397	7421770	123.68	137.102	91.5552	0	3.37421	2.83916	Carubv10021574m.g	AT1G04645	0	Plant self-incompatibility protein S1 family	NA
Cluster_9857	scaffold_2	7422272	7422930	309.963	145.342	230.109	0	0	0	NA	NA	NA	NA	te20697
Cluster_9871	scaffold_2	7447084	7447480	56.7109	59.0965	352.397	141.979	759.717	0	NA	NA	NA	NA	te20732,te20733,te20734,te20735
Cluster_9883	scaffold_2	7478583	7479073	146.732	42.364	135.492	0	0	1.08131	NA	NA	NA	NA	NA
Cluster_10084	scaffold_2	7836552	7838009	160.876	1186.95	65.088	0.920467	1.29831	3.03454	NA	NA	NA	NA	te21229,te21230,te21231
Cluster_10085	scaffold_2	7838389	7839502	1775.93	10303.1	1081.08	10.8423	6.23048	15.092	NA	NA	NA	NA	te21234
Cluster_10086	scaffold_2	7839582	7840774	413.81	2150.47	136.95	1.12493	1.0578	0	Carubv10021959m.g	AT1G66310	0	F-box/RNI-like/FBD-like domains-containing protein	NA
Cluster_10087	scaffold_2	7840877	7841255	196.574	1518.22	43.883	3.541	0	0.46695	Carubv10021959m.g	AT1G66310	0	F-box/RNI-like/FBD-like domains-containing protein	NA
Cluster_10088	scaffold_2	7841400	7842210	1345.15	4756.56	550.086	4.96439	2.33407	0.436434	Carubv10021959m.g	AT1G66310	0	F-box/RNI-like/FBD-like domains-containing protein	te21235
Cluster_10091	scaffold_2	7843212	7844055	3933.44	11289.9	2208.2	11.1307	4.48563	14.0489	NA	NA	NA	NA	te21239
Cluster_10093	scaffold_2	7844877	7847674	1124.47	3434.66	498.957	4.79643	1.57857	0.1265	Carubv10021354m.g	AT1G66300	0	F-box/RNI-like/FBD-like domains-containing protein	te21245
Cluster_10095	scaffold_2	7848657	7849394	47.702	34.0845	31.8157	0	1.70997	0	Carubv10022314m.g	AT1G66300	0	F-box/RNI-like/FBD-like domains-containing protein	NA
Cluster_10096	scaffold_2	7849621	7849956	465.391	1340.36	122.292	3.99417	1.87791	0	Carubv10022314m.g	AT1G66300	0	F-box/RNI-like/FBD-like domains-containing protein	NA
Cluster_10097	scaffold_2	7850034	7850559	106.618	32.1879	9.29974	0	0	0	Carubv10022314m.g	AT1G66300	0	F-box/RNI-like/FBD-like domains-containing protein	NA
Cluster_10100	scaffold_2	7853497	7854489	356.996	625.255	122.168	0	1.27085	0.178222	NA	NA	NA	NA	te21254,te21255
Cluster_10101	scaffold_2	7855155	7857278	406.073	1514.07	145.552	1.89554	0.891212	0.0833211	Carubv10021747m.g	AT1G66310	0	F-box/RNI-like/FBD-like domains-containing protein	NA
Cluster_10104	scaffold_2	7859982	7860653	158.379	8.99811	43.6756	0	0	0	Carubv10020851m.g	AT3G16720	ATL2,TL2	TOXICOS EN LEVADURA 2	te21258
Cluster_10105	scaffold_2	7860916	7861632	843.248	587.3	991.978	0	0.880025	0	NA	NA	NA	NA	te21259
Cluster_10106	scaffold_2	7861774	7864179	290.424	240.763	141.098	0.557789	1.04901	0	Carubv10022031m.g	AT1G66300	0	F-box/RNI-like/FBD-like domains-containing protein	te21260,te21261
Cluster_10109	scaffold_2	7865594	7866563	516.54	601.182	180.538	1.38355	0.650493	0	NA	NA	NA	NA	NA
Cluster_10111	scaffold_2	7867724	7869476	677.189	3108.29	255.606	3.06227	2.15965	0	Carubv10021385m.g	AT1G66300	0	F-box/RNI-like/FBD-like domains-containing protein	NA
Cluster_10194	scaffold_2	8086453	8087471	1578.35	246.616	2020.99	525.49	2463.85	4.16818	NA	NA	NA	NA	te86111,te86112
Cluster_10241	scaffold_2	8214688	8215357	50.0995	161.727	2.9204	0	2.82528	11.6222	Carubv10021306m.g	AT1G66855	0	Carbohydrate-binding X8 domain superfamily protein	te86233
Cluster_10242	scaffold_2	8216803	8217745	690.641	1449.16	251.067	7.1158	3.34559	1.68904	Carubv10022451m.g	AT4G16165	0	Carbohydrate-binding X8 domain superfamily protein	te86238,te86239
Cluster_10244	scaffold_2	8218692	8220358	604.57	1460.07	210.104	24.957	12.1124	5.41432	Carubv10021806m.g	AT1G66855	0	Carbohydrate-binding X8 domain superfamily protein	te86246,te86247,te86248,te86249
Cluster_10262	scaffold_2	8282322	8283000	36.7751	2.4935	18.731	1.9765	21.3733	30.2342	NA	NA	NA	NA	te86284
Cluster_10264	scaffold_2	8283576	8284216	68.9699	3.77331	35.104	4.18733	16.7342	56.0464	NA	NA	NA	NA	te86284
Cluster_10266	scaffold_2	8285150	8285740	65.8007	4.09254	38.0739	22.708	37.3676	44.6178	NA	NA	NA	NA	te86284
Cluster_10270	scaffold_2	8289796	8290065	795.957	150.496	260.889	84.4988	359.891	238.587	Carubv10019878m.g	AT1G66970	SVL2	SHV3-like 2	NA
Cluster_10284	scaffold_2	8329598	8331278	1068.79	1682.87	803.734	3.99179	1.12608	22.4244	NA	NA	NA	NA	te86321,te86322
Cluster_10285	scaffold_2	8331392	8332323	3401.29	1735.64	2427.99	1.43996	0.677015	1.70898	NA	NA	NA	NA	te86324
Cluster_10294	scaffold_2	8374086	8374999	28.6634	11.379	13.915	0	8.28418	141.153	NA	NA	NA	NA	te86351
Cluster_10310	scaffold_2	8474069	8475338	330.058	109.317	281.945	564.291	681.655	25.501	Carubv10021595m.g	AT5G38690	0	Zinc-finger domain of monoamine-oxidase A repressor R1 protein	te86396,te86397,te86398
Cluster_10321	scaffold_2	8543568	8544958	19.4228	108.676	5.62664	0	10.4331	0	Carubv10021778m.g	AT1G67390	0	F-box family protein	te86435
Cluster_10325	scaffold_2	8559804	8562062	976.35	4223.66	444.775	6.53495	23.1833	0.0783418	Carubv10021989m.g	AT1G67390	0	F-box family protein	NA
Cluster_10326	scaffold_2	8562367	8562865	108.285	491.493	47.0541	2.68946	0	0	NA	NA	NA	NA	te86446
Cluster_10350	scaffold_2	8666474	8666530	481.165	0	875.35	0	11.0698	3.10481	NA	NA	NA	NA	NA
Cluster_10431	scaffold_2	8890159	8891895	21.9168	1.25321	9.57493	0.77262	5.0856	52.8783	NA	NA	NA	NA	te86639,te86640,te86641,te86642
Cluster_10467	scaffold_2	9076102	9077590	70.9282	139.046	20.3682	0	0.847519	6.41813	NA	NA	NA	NA	te75272,te75273,te75274,te75275
Cluster_10537	scaffold_2	9420115	9420742	335.041	293.863	235.236	0	1.00474	7.32695	NA	NA	NA	NA	te75510,te75511
Cluster_10613	scaffold_2	9781224	9782590	140.742	685.974	18.6076	9.81741	4.61579	0	NA	NA	NA	NA	NA
Cluster_10709	scaffold_2	10180802	10181167	251.649	0.660844	72.1721	7.33355	158.607	1086.5	NA	NA	NA	NA	te88596,te88597
Cluster_10749	scaffold_2	10263288	10266218	572.195	1074.75	197.936	2.74727	0.86111	0.784941	Carubv10021376m.g	AT1G70985	0	hydroxyproline-rich glycoprotein family protein	te88663,te88664,te88665,te88666
Cluster_10791	scaffold_2	10569600	10569870	111.778	2.67752	61.3714	4.95218	32.5967	327.174	NA	NA	NA	NA	NA
Cluster_10979	scaffold_2	11445963	11446103	272.9	0	360.804	0	22.3751	50.2054	NA	NA	NA	NA	NA
Cluster_11047	scaffold_2	11898711	11903002	18.7889	0.958009	11.3972	0	7.49764	22.7196	NA	NA	NA	NA	te73679,te73680
Cluster_11180	scaffold_2	12355911	12356141	109.869	9.42347	50.8225	0	73.7507	384.593	NA	NA	NA	NA	NA
Cluster_11190	scaffold_2	12366364	12366936	61.4381	0.84422	116.102	49.1847	38.5414	174.503	NA	NA	NA	NA	NA
Cluster_11304	scaffold_2	12928028	12929968	1182.92	1369.22	1241.94	1.38283	1.30032	0	NA	NA	NA	NA	te25178
Cluster_11342	scaffold_2	13099608	13099739	381.439	45.8085	615.164	0	9.56027	0	NA	NA	NA	NA	NA
Cluster_11356	scaffold_2	13133825	13133961	194.217	0	164.246	0	0	620.055	NA	NA	NA	NA	NA
Cluster_11568	scaffold_3	531	1510	27.1507	0.987221	31.9456	0	4.50699	126.229	NA	NA	NA	NA	te66961,te66962
Cluster_11724	scaffold_3	691073	691464	59.5227	2073.16	2.49575	30.8122	6.43855	0	NA	NA	NA	NA	NA
Cluster_11766	scaffold_3	1020934	1022700	74.8273	24.5017	23.2541	150.381	152.12	33.0512	NA	NA	NA	NA	NA
Cluster_11856	scaffold_3	1412763	1413588	536.218	242.455	136.209	0	0	0.214254	NA	NA	NA	NA	te12416
Cluster_11857	scaffold_3	1413837	1415166	695.894	477.009	181.69	1.00905	0.47442	9.71362	Carubv10016318m.g	AT4G08630	0	0	NA
Cluster_11864	scaffold_3	1466354	1467298	23.3914	0.511892	19.6702	2.8403	4.00621	42.5112	NA	NA	NA	NA	te12437
Cluster_11922	scaffold_3	1819351	1819493	177.48	0	506.27	0	8.82487	0	NA	NA	NA	NA	NA
Cluster_12024	scaffold_3	2332610	2333673	23.0836	8.18354	9.19486	0	6.52327	96.3045	Carubv10015962m.g	AT3G07250	0	nuclear transport factor 2 (NTF2) family protein / RNA recognition motif (RRM)-containing protein	te85930
Cluster_12156	scaffold_3	3024048	3024629	40.0909	0	16.8098	0	20.5989	67.2015	NA	NA	NA	NA	te29873
Cluster_12394	scaffold_3	4019683	4021356	15.1611	0	1.16886	0	4.14621	11.1005	NA	NA	NA	NA	te6058
Cluster_12571	scaffold_3	4867835	4869941	1304.4	151.412	1517.41	1.91083	1.49734	1.51188	Carubv10016127m.g	AT3G14260	0	Protein of unknown function (DUF567)	NA
Cluster_12574	scaffold_3	4889673	4890081	66.0564	12.4187	52.6243	0	37.0256	193.417	NA	NA	NA	NA	NA
Cluster_12740	scaffold_3	5636996	5637977	125.473	1894.31	17.9328	2.73328	1.28509	26.6723	Carubv10014472m.g	AT3G16240	AQP1,ATTIP2;1,DELTA-TIP,DELTA-TIP1,TIP2;1	delta tonoplast integral protein	te33223
Cluster_12741	scaffold_3	5638193	5638670	1305.12	1877.27	390.924	2.80762	1.32004	0.740477	Carubv10014651m.g	AT3G16250	NDF4	NDH-dependent cyclic electron flow 1	NA
Cluster_12742	scaffold_3	5638858	5639493	108.774	351.395	6.15304	2.11013	0	0	Carubv10014651m.g	AT3G16250	NDF4	NDH-dependent cyclic electron flow 1	NA
Cluster_12744	scaffold_3	5640096	5641273	6064.14	5043.73	3186.64	3.41776	1.60691	0	NA	NA	NA	NA	te33224,te33225
Cluster_12764	scaffold_3	5742593	5744049	559.098	1661.38	161.153	1.8422	0.866133	0	NA	NA	NA	NA	te33287
Cluster_12766	scaffold_3	5744413	5746681	378.139	1131.96	204.807	4.14027	1.94661	0.623972	Carubv10015591m.g	AT3G16510	0	Calcium-dependent lipid-binding (CaLB domain) family protein	te33289,te33290,te33291
Cluster_12792	scaffold_3	5895288	5895551	834.204	3.66468	1111.74	0	0	0.670356	NA	NA	NA	NA	te33368
Cluster_12793	scaffold_3	5895668	5896434	719.964	0.315344	850.78	1.74973	1.64531	0.230735	NA	NA	NA	NA	te33368
Cluster_12906	scaffold_3	6434779	6437049	20.9091	1218.72	0.861588	1.18189	0.555683	5.22116	NA	NA	NA	NA	NA
Cluster_12907	scaffold_3	6437193	6438900	20.1319	1078.64	0.572794	3.14295	0.73885	0.518074	Carubv10012976m.g	AT3G18370	ATSYTF,NTMC2T3,NTMC2TYPE3,SYTF	C2 domain-containing protein	NA
Cluster_12981	scaffold_3	6843960	6844109	600.379	16.1246	632.655	0	256.598	673.681	NA	NA	NA	NA	te65314
Cluster_13045	scaffold_3	7222249	7223378	124.254	3.63874	25.9734	0	6.70065	193.732	NA	NA	NA	NA	te65484
Cluster_13083	scaffold_3	7466133	7467686	46.6247	1.55643	31.4779	10.3632	20.7078	60.6996	NA	NA	NA	NA	te65590,te65591
Cluster_13084	scaffold_3	7467763	7468326	47.1768	1.71538	13.8771	2.3795	39.1564	26.9854	NA	NA	NA	NA	te65591
Cluster_13085	scaffold_3	7468523	7469748	63.4391	4.53751	51.8692	15.3251	22.6452	60.3386	NA	NA	NA	NA	te65591
Cluster_13086	scaffold_3	7469851	7470812	94.4652	11.0626	132.207	12.5555	46.5691	33.4816	NA	NA	NA	NA	te65591
Cluster_13088	scaffold_3	7471304	7471847	88.7927	4.44612	46.7586	22.2029	41.7559	57.5817	NA	NA	NA	NA	te65591
Cluster_13118	scaffold_3	7584604	7585928	29.3496	5.29374	11.8138	1.01286	4.28589	72.2589	Carubv10016345m.g	AT3G21150	BBX32	B-box 32	te38,te39,te40,te41
Cluster_13261	scaffold_3	8312501	8313882	57.7591	12.951	36.1035	3.88434	11.4142	134.331	NA	NA	NA	NA	te442,te443,te444,te445,te446,te447,te448
Cluster_13295	scaffold_3	8457999	8458453	51.2811	2.12632	27.9524	0	15.2544	190.976	NA	NA	NA	NA	te546,te547,te548
Cluster_13316	scaffold_3	8511994	8512470	50.6323	15.2119	28.7142	0	9.25964	189.589	NA	NA	NA	NA	te96097
Cluster_13330	scaffold_3	8554593	8555423	40.8857	0.291058	28.2551	1.61497	12.9081	163.77	NA	NA	NA	NA	te96145
Cluster_13345	scaffold_3	8616821	8618175	399.984	2042.77	68.5916	11.8852	16.2983	2.61216	NA	NA	NA	NA	te96177,te96178,te96179,te96180
Cluster_13346	scaffold_3	8618253	8619094	800.225	4416.84	89.4675	7.96936	10.4913	4.83421	NA	NA	NA	NA	te96182,te96183,te96184
Cluster_13380	scaffold_3	8758911	8759779	7946.28	1.39165	8758.84	1.54435	1.45219	1.83287	NA	NA	NA	NA	te96284
Cluster_13382	scaffold_3	8761152	8761438	138.352	0	214.756	0	6.59559	6.78298	NA	NA	NA	NA	te96286,te96287
Cluster_13384	scaffold_3	8762156	8763072	11394.8	0.527523	13887.6	7.31756	3.44045	0.385985	NA	NA	NA	NA	te96288
Cluster_13394	scaffold_3	8786787	8787108	783.103	994.518	546.894	0	0	0	NA	NA	NA	NA	NA
Cluster_13396	scaffold_3	8787831	8788545	2041.59	373.121	1927.93	1.87698	0	0	NA	NA	NA	NA	NA
Cluster_13465	scaffold_3	9036546	9036894	77.4128	13.8607	44.8519	0	3.61592	96.3469	NA	NA	NA	NA	NA
Cluster_13619	scaffold_3	9523070	9523507	772.904	9.38761	1049.81	0	0	0.808101	NA	NA	NA	NA	te48463
Cluster_13620	scaffold_3	9523860	9524811	142.326	7.36786	202.449	0	0	0.185897	Carubv10016313m.g	AT5G24050	0	Domain of unknown function (DUF313)	NA
Cluster_13643	scaffold_3	9562718	9564901	747.85	2790.91	154.992	1.84346	3.75582	2.0258	Carubv10015305m.g	AT5G50115	0	0	te48493,te48494,te48495
Cluster_13654	scaffold_3	9578273	9580319	266.167	833.249	59.7419	0	2.77421	3.11239	Carubv10015179m.g	AT5G50115	0	0	te48510,te48511
Cluster_13698	scaffold_3	9690709	9693588	34.5389	1.00779	6.79398	0.465986	3.28634	34.596	NA	NA	NA	NA	NA
Cluster_13715	scaffold_3	9704303	9706305	433.26	1117.33	84.499	15.4104	8.50545	0.0883545	Carubv10016380m.g	AT1G43910	0	P-loop containing nucleoside triphosphate hydrolases superfamily protein	te48622
Cluster_13717	scaffold_3	9707310	9708556	594.492	2202.42	86.3004	4.30486	1.51799	0.14192	Carubv10015071m.g	AT1G43910	0	P-loop containing nucleoside triphosphate hydrolases superfamily protein	NA
Cluster_13718	scaffold_3	9708839	9710878	116.384	827.809	9.11192	1.31573	1.23721	0	Carubv10013636m.g	AT1G43910	0	P-loop containing nucleoside triphosphate hydrolases superfamily protein	te48629
Cluster_13795	scaffold_3	9878102	9878504	84.3077	0	2.42762	0	4.69711	7.46541	NA	NA	NA	NA	te48797
Cluster_13829	scaffold_3	9970702	9971446	170.333	286.996	14.4452	1.8014	0.846951	0.950197	NA	NA	NA	NA	NA
Cluster_13853	scaffold_3	10028163	10029543	58.3938	92.1239	69.4255	1159.34	1094.73	5.76672	NA	NA	NA	NA	te48951,te48952,te48953,te48954
Cluster_13864	scaffold_3	10059223	10060140	2254.99	3905.47	1896.99	2.92384	2.06202	0.771129	NA	NA	NA	NA	te48997
Cluster_13865	scaffold_3	10060441	10061335	609.679	1035.31	431.778	0	1.41001	5.73436	NA	NA	NA	NA	te49000
Cluster_13898	scaffold_3	10114910	10115397	83.0442	8.9214	34.0813	0	16.8088	127.291	NA	NA	NA	NA	te49074
Cluster_13899	scaffold_3	10115662	10116608	37.1743	2.55406	1.03309	2.8343	7.9955	18.3141	NA	NA	NA	NA	te49074,te49075
Cluster_13900	scaffold_3	10116938	10118065	41.0075	0.643269	4.33658	0	2.23751	11.4531	NA	NA	NA	NA	te49079,te49080
Cluster_13901	scaffold_3	10118755	10119522	39.4425	1.8896	10.191	0	2.46476	30.8783	NA	NA	NA	NA	te49082,te49083,te49084
Cluster_13928	scaffold_3	10156007	10156373	157.27	24.3846	802.393	1334.73	1277.43	85.8349	NA	NA	NA	NA	NA
Cluster_13936	scaffold_3	10165957	10166717	2648.13	4107.01	3831.05	3.52704	1.65829	1.16277	NA	NA	NA	NA	NA
Cluster_13946	scaffold_3	10173421	10174532	24.664	5.4377	27.2737	0	27.2365	19.7345	NA	NA	NA	NA	te49152,te49153
Cluster_13986	scaffold_3	10208686	10210277	64.2823	2763.72	3.07265	3.37196	1.98172	0.444659	Carubv10015424m.g	AT2G17305	0	0	NA
Cluster_13989	scaffold_3	10211684	10212483	32.748	552.671	0	5.03265	1.57745	0	Carubv10013318m.g	AT2G05810	0	ARM repeat superfamily protein	te49212,te49213
Cluster_14050	scaffold_3	10301437	10302130	33.6209	0.697029	2.8194	0	38.186	47.4311	NA	NA	NA	NA	te49339
Cluster_14108	scaffold_3	10377304	10377833	45.5691	0	0	0	7.14315	3.00522	NA	NA	NA	NA	te49460
Cluster_14218	scaffold_3	10538457	10540170	15.7626	2.68116	6.84947	0	8.0989	40.5781	NA	NA	NA	NA	te10823,te10824,te10825,te10826
Cluster_14233	scaffold_3	10567950	10568671	40.2546	26.4649	18.9704	0	11.3611	82.8494	NA	NA	NA	NA	te10866,te10867
Cluster_14245	scaffold_3	10581265	10582211	53.1679	56.1892	9.29778	1.41715	2.66517	8.22266	NA	NA	NA	NA	te10885,te10886
Cluster_14593	scaffold_3	11037555	11037897	124.118	338.476	105.534	0	16.5563	23.2182	NA	NA	NA	NA	te11430
Cluster_14602	scaffold_3	11049482	11049927	50.4803	3.79615	6.58071	6.01812	52.3457	14.6817	NA	NA	NA	NA	te11442
Cluster_14716	scaffold_3	11192197	11192647	56.2742	0.536295	10.8463	0	9.79345	0	Carubv10015394m.g	AT2G12480	SCPL43	serine carboxypeptidase-like 43	NA
Cluster_14734	scaffold_3	11222405	11224099	201.414	2.14043	30.0138	0	53.233	9.18804	NA	NA	NA	NA	te11704,te11705,te11706,te11707
Cluster_14736	scaffold_3	11224466	11226709	87.0141	3.01797	21.3629	0	34.3045	11.2778	NA	NA	NA	NA	te11709
Cluster_14737	scaffold_3	11226785	11227182	58.6254	1.21542	9.83249	0	22.1952	2.22329	NA	NA	NA	NA	NA
Cluster_14747	scaffold_3	11232871	11233912	34.5708	84.9559	35.6782	10.3036	18.1664	52.311	NA	NA	NA	NA	te11716,te11717,te11718
Cluster_14802	scaffold_3	11303674	11308008	145.232	52.8932	195.215	1021.62	788.613	24.7805	NA	NA	NA	NA	te11790,te11791,te11792,te11793
Cluster_14823	scaffold_3	11323358	11324559	98.0804	0.603667	15.4645	0	30.9715	31.5079	NA	NA	NA	NA	te11821,te11822
Cluster_14921	scaffold_3	11457195	11457833	34.5929	0.757024	7.65519	0	16.7866	2.21564	NA	NA	NA	NA	NA
Cluster_14946	scaffold_3	11481786	11482789	37.9178	134.425	1.94887	0	7.54157	6.69822	NA	NA	NA	NA	te62079
Cluster_14963	scaffold_3	11496421	11498646	13.976	8.80117	19.7776	0	33.7315	5.40622	Carubv10015718m.g	AT1G73700	0	MATE efflux family protein	te62098,te62099
Cluster_14986	scaffold_3	11516285	11517793	17.3614	10.5788	29.8233	0	28.8519	14.5426	NA	NA	NA	NA	te62114
Cluster_15032	scaffold_3	11555727	11557539	58.2527	17.2097	11.332	0	12.5291	8.00434	NA	NA	NA	NA	te62162
Cluster_15034	scaffold_3	11558639	11561816	45.3401	2.58765	7.69614	0	14.8909	3.17417	NA	NA	NA	NA	te62169,te62170,te62171,te62172
Cluster_15082	scaffold_3	11641773	11641962	172.358	0	25.7456	0	3.32094	0	NA	NA	NA	NA	NA
Cluster_15084	scaffold_3	11642412	11643723	358.805	0	161.067	0	0.961857	4.856	NA	NA	NA	NA	te62262,te62263
Cluster_15087	scaffold_3	11652473	11652790	79.8103	9.12714	21.5356	0	27.7789	110.191	NA	NA	NA	NA	te62268
Cluster_15154	scaffold_3	11794762	11795815	24.4678	0.688432	7.42568	0	8.97976	10.2423	NA	NA	NA	NA	te62418,te62419,te62420
Cluster_15163	scaffold_3	11799926	11800283	85.7576	0	10.9311	0	3.52502	0	NA	NA	NA	NA	NA
Cluster_15183	scaffold_3	11819469	11819977	2912.89	1660.77	2517.91	2.63662	1.23964	10.4307	NA	NA	NA	NA	te62459,te62460,te62461
Cluster_15184	scaffold_3	11820458	11820650	632.052	589.008	740.086	0	0	1.83393	NA	NA	NA	NA	te62463
Cluster_15207	scaffold_3	11868532	11869348	83.1726	65.13	99.39	0	0.772311	0	NA	NA	NA	NA	NA
Cluster_15219	scaffold_3	11885641	11886463	36.3092	1.46944	16.6424	0	8.43349	6.23603	NA	NA	NA	NA	te62565,te62566,te62567
Cluster_15366	scaffold_3	12152771	12155023	66.6805	4.07946	21.2775	0	32.7672	15.7886	NA	NA	NA	NA	te62888,te62889,te62890,te62891
Cluster_15380	scaffold_3	12181386	12183519	203.332	1.92679	26.5901	1.25777	25.1327	1.0781	NA	NA	NA	NA	te62918,te62919,te62920,te62921
Cluster_15381	scaffold_3	12183614	12185839	76.684	1.19522	10.1086	0	5.38571	0	NA	NA	NA	NA	te62922,te62923,te62924,te62925,te62926,te62927
Cluster_15391	scaffold_3	12226071	12227175	26.6725	0	0	0	3.42613	0.800788	NA	NA	NA	NA	te62973,te62974
Cluster_15411	scaffold_3	12254531	12255412	27.3828	2.74228	18.8568	16.7375	45.7853	110.157	NA	NA	NA	NA	NA
Cluster_15493	scaffold_3	12463331	12464652	56.6649	3370.62	4.44024	1.01516	3.34103	1.74029	Carubv10015875m.g	AT2G15740	0	C2H2-like zinc finger protein	NA
Cluster_15504	scaffold_3	12476554	12477020	149.014	184.898	1435.03	1298.93	1060.64	1.13688	NA	NA	NA	NA	NA
Cluster_15509	scaffold_3	12485136	12486526	24.1313	1.04329	7.73664	0	6.80422	84.8611	NA	NA	NA	NA	te7105,te7106,te7107
Cluster_15639	scaffold_3	12754974	12755659	178.419	38.0785	142.614	1.95633	2.75938	1.03192	NA	NA	NA	NA	te7396,te7397
Cluster_15640	scaffold_3	12756066	12756627	610.382	0.430372	482.203	0	0	0.944702	NA	NA	NA	NA	NA
Cluster_15667	scaffold_3	12808234	12810093	2404.16	3730.51	1697.35	7.21527	3.73159	14.5575	NA	NA	NA	NA	te7444,te7445,te7446,te7447,te7448,te7449,te7450
Cluster_15668	scaffold_3	12810272	12814232	1382.24	3018.88	1341.16	1.35525	1.27438	0.446791	Carubv10016295m.g	AT2G16530	0	3-oxo-5-alpha-steroid 4-dehydrogenase family protein	te7451,te7452,te7453
Cluster_15669	scaffold_3	12814385	12815126	2796.49	4325.61	2594.82	9.0434	1.70075	0.954038	NA	NA	NA	NA	te7454,te7455
Cluster_15670	scaffold_3	12815359	12815745	916.012	3177.42	1089.56	0	3.26087	0	NA	NA	NA	NA	NA
Cluster_15684	scaffold_3	12833494	12834152	33.543	0.367024	13.3611	14.2554	24.8944	10.742	NA	NA	NA	NA	te7477
Cluster_15731	scaffold_3	12914539	12914649	420.413	0	378.994	0	51.1604	4.78308	NA	NA	NA	NA	te7558
Cluster_15860	scaffold_3	13263027	13263359	87.2787	18.8847	5.87587	8.0603	5.68449	4.78308	NA	NA	NA	NA	NA
Cluster_15862	scaffold_3	13264148	13265075	2413.31	6839.58	622	10.1232	17.6783	0.572115	NA	NA	NA	NA	te7842
Cluster_15863	scaffold_3	13265276	13265708	313.866	834.532	88.1177	3.0994	4.37167	0	NA	NA	NA	NA	te7843
Cluster_15864	scaffold_3	13265800	13266909	1050.29	5351.63	289.974	7.25427	9.66363	0.318872	NA	NA	NA	NA	te7844
Cluster_15865	scaffold_3	13267217	13267827	3677.44	12095.8	946.309	21.9647	18.5886	0.289647	NA	NA	NA	NA	te7846
Cluster_15866	scaffold_3	13268016	13268403	96.0072	305.453	10.0859	3.45887	6.50493	0.456119	NA	NA	NA	NA	te7847
Cluster_15867	scaffold_3	13269000	13269481	72.1882	8.02885	2.02974	5.56863	3.92725	0	NA	NA	NA	NA	NA
Cluster_15915	scaffold_3	13422285	13422699	458.669	8.74226	51.8634	0	6.08172	0	NA	NA	NA	NA	NA
Cluster_15927	scaffold_3	13478062	13478423	74.6328	27.394	35.1335	163.121	153.387	309.46	NA	NA	NA	NA	NA
Cluster_15991	scaffold_3	13635245	13635927	102.487	37.5375	8.59443	0	0.923833	4.66403	NA	NA	NA	NA	te2097
Cluster_16003	scaffold_3	13667505	13668134	57.179	18.812	40.3756	129.944	134.208	255.067	NA	NA	NA	NA	NA
Cluster_16055	scaffold_3	13819292	13822350	20.2065	3.08365	11.5136	0.877437	23.3084	24.3564	NA	NA	NA	NA	te2214
Cluster_16129	scaffold_3	14001297	14003464	128.771	372.175	27.5269	1.23804	10.7685	8.08138	NA	NA	NA	NA	te2352,te2353,te2354,te2355,te2356
Cluster_16145	scaffold_3	14063882	14064691	54.0745	2704.16	3.62346	4.97052	0.778985	0	NA	NA	NA	NA	te2397
Cluster_16162	scaffold_3	14082659	14083257	120.96	4.44167	3.26655	2.24047	16.8542	90.9984	NA	NA	NA	NA	te2412,te2413
Cluster_16173	scaffold_3	14115061	14115698	4975.71	480.705	7932.47	2.10351	6.92296	11.9277	Carubv10013910m.g	AT2G19080	0	metaxin-related	te2448,te2449
Cluster_16189	scaffold_3	14156060	14156735	33.3051	1.43118	15.9196	1.98527	0.9334	79.3242	NA	NA	NA	NA	te2478,te2479
Cluster_16212	scaffold_3	14196313	14197284	3691.72	3047.75	3447.31	8.2842	1.94746	2.73108	NA	NA	NA	NA	NA
Cluster_16213	scaffold_3	14197446	14198286	1646.65	280.119	1514.61	0	2.25081	0.631299	NA	NA	NA	NA	te2512
Cluster_16227	scaffold_3	14254200	14254553	202.362	207.024	58.0367	0	0	0.499927	NA	NA	NA	NA	NA
Cluster_16261	scaffold_3	14335356	14335699	134.467	193.355	102.384	156.051	154.076	5.1446	NA	NA	NA	NA	NA
Cluster_16302	scaffold_3	14446986	14447556	46.5984	1.27077	8.56684	2.35033	5.5252	60.4377	Carubv10015658m.g	AT5G15690	0	zinc ion binding	te2690,te2691
Cluster_16319	scaffold_3	14535512	14536147	260.671	163.528	1429.04	248.995	784.754	1.11304	NA	NA	NA	NA	NA
Cluster_16332	scaffold_3	14582066	14582885	83.8667	97.0426	65.6199	0	0.769486	0.215822	NA	NA	NA	NA	NA
Cluster_16333	scaffold_3	14583030	14583890	1057.37	352.55	963.561	0	0.732843	1.23327	NA	NA	NA	NA	te86739
Cluster_16353	scaffold_3	14632813	14634059	28.231	8.53427	14.9064	0	8.60195	86.2873	NA	NA	NA	NA	te86777,te86778,te86779
Cluster_16443	scaffold_3	14946103	14946761	62.1167	10.6437	32.6606	32.5837	63.1936	239.546	NA	NA	NA	NA	te86961
Cluster_16459	scaffold_3	14988885	14990002	2300.85	379.462	1779.9	3693.61	4999.29	2965.5	Carubv10015397m.g	AT4G00390	0	DNA-binding storekeeper protein-related transcriptional regulator	te86990
Cluster_16608	scaffold_4	265439	266173	59.5924	7.89777	30.6145	332.315	87.5643	116.538	NA	NA	NA	NA	te14988
Cluster_16642	scaffold_4	368768	369293	42.0245	39.0853	40.9189	84.1965	145.149	0	Carubv10024873m.g	AT4G38870	0	F-box and associated interaction domains-containing protein	NA
Cluster_16644	scaffold_4	376465	376793	158.016	348.468	184.367	301.857	360.559	0	Carubv10024620m.g	AT5G44220	0	F-box family protein	NA
Cluster_16648	scaffold_4	379787	380329	202.79	251.669	243.232	741.459	985.395	0.325919	Carubv10025493m.g	AT4G38870	0	F-box and associated interaction domains-containing protein	NA
Cluster_16660	scaffold_4	418890	420041	417.877	283.65	480.674	1.16497	1.64317	1.9971	NA	NA	NA	NA	te15079
Cluster_16661	scaffold_4	421092	422104	217.404	88.5819	310.98	0	0.622881	0	NA	NA	NA	NA	NA
Cluster_16681	scaffold_4	459291	460251	51.5414	114.768	30.5411	1.3965	1.31317	0	Carubv10025290m.g	AT1G77525	0	0	te15111
Cluster_16684	scaffold_4	461903	462181	142.319	45.9465	35.0657	0	0	1.26863	NA	NA	NA	NA	NA
Cluster_16686	scaffold_4	462863	464199	406.9	606.391	201.96	5.01885	2.83161	0.264733	Carubv10025413m.g	AT1G77525	0	0	te15117,te15118
Cluster_16687	scaffold_4	464700	465492	2692.52	1053.79	1457.01	5.07708	3.97842	2.45487	NA	NA	NA	NA	te15120,te15121
Cluster_16813	scaffold_4	850463	850616	239.23	9.42347	158.82	122.004	204.863	378.081	NA	NA	NA	NA	te15469
Cluster_16829	scaffold_4	876264	876805	101.96	1000.95	10.8303	0	1.16417	0.979561	Carubv10023233m.g	AT2G23010	SCPL9	serine carboxypeptidase-like 9	NA
Cluster_16857	scaffold_4	968681	968996	104.928	8.41949	157.895	0	7.98706	101.368	NA	NA	NA	NA	te15587
Cluster_16884	scaffold_4	1040649	1041147	111.566	0	17.6453	0	10.1159	53.5533	NA	NA	NA	NA	NA
Cluster_16888	scaffold_4	1047140	1047808	93.618	0.361538	7.3119	0	7.54533	8.20059	NA	NA	NA	NA	te12490,te12491,te12492
Cluster_16971	scaffold_4	1307750	1308324	42.0028	54.2628	30.6261	4.66797	23.0444	75.4064	NA	NA	NA	NA	te12753,te12754
Cluster_16972	scaffold_4	1308880	1309103	204.675	101.499	296.994	0	2.81687	2.37019	NA	NA	NA	NA	NA
Cluster_16996	scaffold_4	1375767	1376242	15896.7	1.52439	17161.9	11.2777	10.6047	0	NA	NA	NA	NA	te12819
Cluster_16997	scaffold_4	1376517	1376868	389.58	0.687128	425.241	0	0	0	NA	NA	NA	NA	te12820,te12821,te12822
Cluster_16999	scaffold_4	1377244	1377534	151.923	0	127.755	0	0	0	NA	NA	NA	NA	NA
Cluster_17011	scaffold_4	1426021	1426648	82.1306	614.686	147.996	1258.7	1186.6	70.1697	NA	NA	NA	NA	NA
Cluster_17163	scaffold_4	1804892	1805363	151.771	15.373	43.5275	142.165	183.144	34.8699	NA	NA	NA	NA	NA
Cluster_17245	scaffold_4	1981426	1981551	243.66	130.533	644.457	926.647	1176.82	0	NA	NA	NA	NA	NA
Cluster_17250	scaffold_4	1990268	1990588	139	22341.6	40062.9	15937.3	1562.7	0	NA	NA	NA	NA	NA
Cluster_17251	scaffold_4	1995669	1996053	517.8	482.482	1816.9	833.111	3269.61	0	NA	NA	NA	NA	NA
Cluster_17255	scaffold_4	2012621	2012929	1922.22	54.0096	3349.76	290.993	11892.6	0.572732	NA	NA	NA	NA	NA
Cluster_17273	scaffold_4	2046116	2048265	683.899	2510.15	115.58	4.36943	0.880435	0	Carubv10024914m.g, Carubv10025475m.g	AT2G24840, AT4G39753	AGL61, 0	AGAMOUS-like 61, Galactose oxidase/kelch repeat superfamily protein	NA
Cluster_17276	scaffold_4	2049025	2049482	638.156	1950.8	279.829	2.93022	0	0	NA	NA	NA	NA	te89088
Cluster_17298	scaffold_4	2091163	2091937	3304.37	107.047	499.897	1510.01	1023.41	2.28354	NA	NA	NA	NA	NA
Cluster_17299	scaffold_4	2092041	2092483	8707.22	150.69	556.523	2617.43	2256.14	0	NA	NA	NA	NA	NA
Cluster_17466	scaffold_4	2431590	2432690	83.2827	19.5516	37.3206	0	10.8888	128.109	NA	NA	NA	NA	te89532,te89533,te89534
Cluster_17477	scaffold_4	2498909	2499219	85.5553	102.658	94.3729	8.63049	6.08661	24.4691	NA	NA	NA	NA	te89591,te89592,te89593,te89594
Cluster_17480	scaffold_4	2501632	2502612	32.5477	9.12248	13.9619	0	6.43199	112.931	NA	NA	NA	NA	te89604
Cluster_17580	scaffold_4	2682903	2683342	360.972	255.612	409.121	82.3525	344.17	372.45	NA	NA	NA	NA	NA
Cluster_17601	scaffold_4	2722966	2723750	984.003	1122.77	1215.13	13.6768	4.82276	14.203	NA	NA	NA	NA	NA
Cluster_17614	scaffold_4	2741646	2742075	209.435	267.743	250.271	0	0	0.823135	NA	NA	NA	NA	NA
Cluster_17616	scaffold_4	2742735	2743187	65.9658	171.925	36.7145	0	1.39289	2.34403	NA	NA	NA	NA	NA
Cluster_17617	scaffold_4	2747871	2749221	39.9956	8.05634	11.5865	0	11.6761	42.4423	NA	NA	NA	NA	te89876,te89877,te89878,te89879
Cluster_17641	scaffold_4	2777009	2777529	178.354	107.239	215.947	0	4.84436	6.45395	NA	NA	NA	NA	te89911,te89912,te89913
Cluster_17713	scaffold_4	2880582	2880742	254.254	15.0229	522.588	8.33566	11.7574	318.773	NA	NA	NA	NA	NA
Cluster_17725	scaffold_4	2895626	2895836	209.525	1.1463	194.739	0	8.97125	8.3874	NA	NA	NA	NA	te90061,te90062
Cluster_17733	scaffold_4	2909294	2910855	494.783	3153.9	121.509	4.2959	2.42373	4.98519	Carubv10024652m.g	AT2G26320	AGL33	AGAMOUS-like 33	te90076,te90077
Cluster_17747	scaffold_4	2920731	2922027	209.567	1425.29	56.5728	5.17363	2.91894	2.31963	Carubv10025009m.g	AT2G26320	AGL33	AGAMOUS-like 33	te90100
Cluster_17748	scaffold_4	2922509	2924834	82.5386	1345.36	21.0304	4.61579	4.06908	4.1086	NA	NA	NA	NA	te90103,te90104,te90105,te90106,te90107
Cluster_17855	scaffold_4	3095220	3095457	94.5975	11.1788	172.647	0	13.2558	13.3846	NA	NA	NA	NA	te35619
Cluster_17896	scaffold_4	3161079	3162158	26.1529	3.13534	14.4938	0	60.7609	4.58822	NA	NA	NA	NA	te35674,te35675
Cluster_17932	scaffold_4	3196423	3197997	42.3644	0.614271	9.93862	0.852089	4.80745	77.1944	NA	NA	NA	NA	te35728
Cluster_17940	scaffold_4	3224735	3225852	21.9687	0.432682	0.875074	1.20039	3.38629	6.17352	NA	NA	NA	NA	te35742
Cluster_17952	scaffold_4	3258553	3258791	215.808	46.5522	16.3738	0	2.64008	0.740477	NA	NA	NA	NA	te35779,te35780
Cluster_17954	scaffold_4	3262265	3262669	115.224	37.6241	16.9095	0	6.23188	1.31092	NA	NA	NA	NA	te35791
Cluster_17957	scaffold_4	3264667	3265317	64.7665	32.6951	25.5479	0	0.969244	0.543699	Carubv10025621m.g	AT2G26320	AGL33	AGAMOUS-like 33	te35795
Cluster_17960	scaffold_4	3266808	3267096	696.885	413.437	389.302	0	8.73326	11.0226	NA	NA	NA	NA	te35800
Cluster_17961	scaffold_4	3267737	3268576	134.501	4.60703	16.3055	0	0.751164	0	NA	NA	NA	NA	te35803
Cluster_17976	scaffold_4	3289517	3290523	36.5853	266.128	13.6014	1.33271	1.25318	2.46041	NA	NA	NA	NA	te35835,te35836
Cluster_17977	scaffold_4	3291601	3292109	85.2476	430.993	13.4545	0	6.19821	16.3414	NA	NA	NA	NA	te35841,te35842,te35843,te35844
Cluster_17978	scaffold_4	3292450	3293912	79.1838	606.409	18.7241	2.75196	7.33194	4.7177	NA	NA	NA	NA	te35847,te35848,te35849,te35850
Cluster_17990	scaffold_4	3303825	3304916	54.355	5.5373	13.4386	7.37385	9.82292	122.521	NA	NA	NA	NA	te35870,te35871
Cluster_18007	scaffold_4	3325639	3326222	167.525	0	113.915	0	1.08044	0	NA	NA	NA	NA	te35896,te35897
Cluster_18008	scaffold_4	3326397	3327078	316.916	0.709294	176.444	0	0.925188	0	NA	NA	NA	NA	te35898
Cluster_18009	scaffold_4	3327516	3328744	58.9543	1.77121	11.1446	2.18396	9.24134	7.77592	NA	NA	NA	NA	te35900,te35901,te35902
Cluster_18025	scaffold_4	3352433	3352890	419.181	35.9107	606.652	96.6972	336.154	420.024	NA	NA	NA	NA	te35926
Cluster_18068	scaffold_4	3429663	3430121	52.6179	10.539	40.4974	8.77151	67.3593	1.54226	NA	NA	NA	NA	te36022
Cluster_18071	scaffold_4	3430845	3431898	55.9263	0.229477	3.71284	0	11.973	0.167907	NA	NA	NA	NA	te36024,te36025
Cluster_18072	scaffold_4	3431978	3433270	23.4276	0.935302	2.26991	0	3.41597	4.37987	NA	NA	NA	NA	te36025,te36026,te36027
Cluster_18088	scaffold_4	3445794	3446735	33.8952	1.28381	10.3857	1.42467	19.425	2.81806	NA	NA	NA	NA	te36038
Cluster_18162	scaffold_4	3537470	3538520	42.8434	1.61093	0.930859	0	3.0018	1.68386	NA	NA	NA	NA	te36136
Cluster_18237	scaffold_4	3613911	3614395	98.7503	36.405	772.58	232.436	900.282	0	NA	NA	NA	NA	te36227
Cluster_18250	scaffold_4	3649500	3650400	50.8847	0.268445	5.42915	0	2.10093	0.982098	Carubv10025364m.g	AT1G72900	0	Toll-Interleukin-Resistance (TIR) domain-containing protein	te36276
Cluster_18261	scaffold_4	3673900	3674630	75.598	4.30137	13.3835	0	16.4003	39.22	NA	NA	NA	NA	te36307
Cluster_18276	scaffold_4	3697185	3699496	38.5978	1.67383	8.46309	0.580467	4.36663	17.2994	NA	NA	NA	NA	te36333,te36334
Cluster_18443	scaffold_4	3909165	3909885	43.1492	5.03195	9.49838	0	12.252	33.3821	NA	NA	NA	NA	te36560
Cluster_18526	scaffold_4	4010204	4010717	46.1912	55.0558	140.849	96.606	136.262	0.688615	NA	NA	NA	NA	te42112
Cluster_18528	scaffold_4	4012639	4013750	63.6848	16.5306	80.0614	142.411	190.655	1.2732	NA	NA	NA	NA	te42113,te42114,te42115,te42116
Cluster_18540	scaffold_4	4027815	4028133	98.8085	1.51642	0	0	17.8019	1.10956	NA	NA	NA	NA	te42132
Cluster_18541	scaffold_4	4028402	4028809	72.2381	0.592816	4.79575	0	10.8256	1.30128	NA	NA	NA	NA	te42134,te42135
Cluster_18574	scaffold_4	4053534	4054931	27.2314	2.24914	4.89866	0	27.0806	8.22841	NA	NA	NA	NA	te42184
Cluster_18590	scaffold_4	4076000	4076353	74.0067	7.51571	44.2184	3.79107	40.9958	12.4982	NA	NA	NA	NA	te42203
Cluster_18600	scaffold_4	4084577	4085962	36.3275	1.39607	4.23521	0	6.37352	10.0873	NA	NA	NA	NA	te42211,te42212,te42213
Cluster_18605	scaffold_4	4089648	4090972	50.0488	0	4.43019	0	19.5246	1.46922	NA	NA	NA	NA	te42217
Cluster_18606	scaffold_4	4091049	4092682	155.322	0	7.78355	0	33.9817	3.14091	NA	NA	NA	NA	te42218,te42219
Cluster_18608	scaffold_4	4093186	4094030	46.506	0.572471	8.10453	0	20.9082	2.3038	NA	NA	NA	NA	te42220
Cluster_18612	scaffold_4	4095950	4098626	54.5901	4.51754	8.77101	0	18.6206	10.1147	NA	NA	NA	NA	te42221,te42222,te42223,te42224
Cluster_18658	scaffold_4	4138395	4139394	24.9703	0	0.978333	0	5.04782	1.06184	NA	NA	NA	NA	te42259,te42260
Cluster_18681	scaffold_4	4160795	4161785	112.767	319.97	49.3609	0	15.9177	197.154	NA	NA	NA	NA	te42281
Cluster_18717	scaffold_4	4206574	4207493	57.3979	1.0516	1.06341	0	4.80092	3.07781	NA	NA	NA	NA	te42343,te42344
Cluster_18719	scaffold_4	4207928	4208319	57.4342	4.9361	0	0	4.82891	0.451465	NA	NA	NA	NA	NA
Cluster_18723	scaffold_4	4212346	4212886	60.5323	2.23539	10.8503	2.48067	19.8274	9.15947	Carubv10024535m.g	AT1G66235	0	0	NA
Cluster_18728	scaffold_4	4214942	4216432	25.2583	1.94663	7.87391	1.80019	15.6581	13.2938	NA	NA	NA	NA	te42361,te42362
Cluster_18774	scaffold_4	4265075	4266167	48.6875	0	5.37054	0	9.23664	3.72407	NA	NA	NA	NA	te42405,te42406
Cluster_18788	scaffold_4	4279768	4282233	130.474	0.882734	17.8528	2.72109	37.3572	5.66949	NA	NA	NA	NA	te42430,te42431,te42432,te42433,te42434
Cluster_18789	scaffold_4	4282578	4283367	98.9693	0	2.47679	0	15.9741	0.224018	NA	NA	NA	NA	te42436
Cluster_18790	scaffold_4	4283456	4284326	78.486	1.38846	13.4788	0	37.6703	4.47007	NA	NA	NA	NA	te42437
Cluster_18792	scaffold_4	4284717	4286061	2046.44	5598.42	550.63	8.9802	18.296	1.44737	NA	NA	NA	NA	te42440,te42441
Cluster_18797	scaffold_4	4288084	4288837	157.985	1118.56	29.843	5.33968	5.85789	3.75542	NA	NA	NA	NA	te42442,te42443,te42444
Cluster_18835	scaffold_4	4333308	4333958	65.3953	10.7745	21.0394	8.24602	43.616	22.8354	NA	NA	NA	NA	te42484
Cluster_18836	scaffold_4	4344200	4345043	26.6756	2.00602	4.63665	3.18019	14.9521	13.4198	NA	NA	NA	NA	te42485,te42486,te42487
Cluster_18837	scaffold_4	4345203	4345671	52.3688	6.18855	31.29	8.58448	14.7991	52.0734	NA	NA	NA	NA	te42486,te42487
Cluster_18838	scaffold_4	4345901	4347821	72.8774	11.3317	26.4827	13.9723	52.8826	31.5992	NA	NA	NA	NA	te42486,te42487
Cluster_18839	scaffold_4	4348106	4349184	26.5565	5.15569	6.34692	0	8.18693	17.2218	NA	NA	NA	NA	te42490
Cluster_18959	scaffold_4	4486679	4487014	68.2249	644.984	13871.4	1877.26	803.746	28.4423	NA	NA	NA	NA	te42602
Cluster_18960	scaffold_4	4487206	4487447	111.641	173.906	1010.67	820.752	1804.28	0	NA	NA	NA	NA	te42602,te42603
Cluster_18962	scaffold_4	4492918	4493243	150.681	71.2253	708.241	753.354	1372.28	0.542865	NA	NA	NA	NA	te41534
Cluster_18966	scaffold_4	4499353	4499884	77.7148	72.2879	1020.63	343.078	622.676	0.332658	NA	NA	NA	NA	te41538,te41539
Cluster_18967	scaffold_4	4499976	4500311	203.456	258.426	1869.31	1070.44	3181.18	0.526709	NA	NA	NA	NA	te41538,te41539
Cluster_18986	scaffold_4	4526748	4528500	111.152	1.51772	14.5104	0	16.5573	47.045	NA	NA	NA	NA	te41557,te41558,te41559
Cluster_18992	scaffold_4	4534851	4535589	57.608	7.20043	5.29544	0	2.56148	7.66329	NA	NA	NA	NA	te41564,te41565
Cluster_18996	scaffold_4	4538173	4539514	21.6571	0.18023	2.91604	0	2.82106	6.85742	NA	NA	NA	NA	te41568
Cluster_19011	scaffold_4	4559618	4561327	21.3053	3.5361	2.2885	0	8.48684	8.48648	NA	NA	NA	NA	te41580
Cluster_19012	scaffold_4	4561423	4562055	51.0878	1.9105	1.54555	0	5.98084	15.9361	NA	NA	NA	NA	te41581
Cluster_19045	scaffold_4	4597725	4598140	214.515	19.1867	406.855	103.234	209.315	3.82877	NA	NA	NA	NA	NA
Cluster_19053	scaffold_4	4607769	4607971	127.039	21.4465	96.3875	0	68.3819	74.9743	NA	NA	NA	NA	te41625,te41627
Cluster_19062	scaffold_4	4617820	4619694	24.2335	0.902978	2.60889	4.29453	8.07652	13.9692	Carubv10025163m.g	0	0	0	te41638,te41639
Cluster_19071	scaffold_4	4627895	4628861	50.7983	0.750369	0	0	5.22009	8.78465	NA	NA	NA	NA	te41645
Cluster_19207	scaffold_4	4817816	4818473	158.016	11.7626	63.9336	20.3958	107.401	263.31	NA	NA	NA	NA	te41881
Cluster_19257	scaffold_4	4906543	4908543	66.8952	1.57136	4.4003	0.670685	5.36063	10.2594	NA	NA	NA	NA	te42000,te42001
Cluster_19261	scaffold_4	4910931	4911714	45.4252	0.617013	2.49575	0	4.0241	1.58013	NA	NA	NA	NA	te42008,te42009,te42010
Cluster_19263	scaffold_4	4911965	4913014	28.0697	0.230352	0	0	2.40373	5.0564	NA	NA	NA	NA	te42010,te42011
Cluster_19325	scaffold_4	5005928	5007419	21.949	0.486332	5.24575	0	8.03524	0.355846	NA	NA	NA	NA	te53112,te53113,te53114,te53115,te53116,te53117
Cluster_19326	scaffold_4	5007809	5008970	50.7283	0.416298	6.73551	1.15494	17.3763	1.21841	NA	NA	NA	NA	te53120,te53121
Cluster_19336	scaffold_4	5015120	5015987	26.4096	0.557302	1.12711	0	5.81547	21.2043	NA	NA	NA	NA	te53141,te53142,te53143,te53144
Cluster_19384	scaffold_4	5065722	5066623	57.1818	0.268148	4.3385	1.48785	9.79345	8.63288	NA	NA	NA	NA	te53203,te53204,te53205,te53206,te53207
Cluster_19385	scaffold_4	5066876	5068443	76.753	0	4.36756	0	28.9735	4.40178	NA	NA	NA	NA	te53208
Cluster_19386	scaffold_4	5068554	5069135	45.7177	0	6.72394	0	7.58908	0	NA	NA	NA	NA	te53208,te53209
Cluster_19461	scaffold_4	5206350	5207673	75.439	2.00949	7.38922	0	3.81256	16.1736	NA	NA	NA	NA	te53334,te53335,te53336,te53337,te53338
Cluster_19471	scaffold_4	5222298	5223377	146.684	78.1595	302.558	282.077	475.571	1.96638	NA	NA	NA	NA	NA
Cluster_19533	scaffold_4	5276530	5278411	22.6208	0	1.55951	0	12.7403	11.2842	Carubv10025675m.g	AT3G32904	0	0	te53427
Cluster_19534	scaffold_4	5278660	5279926	52.0168	0.381798	1.54433	0	13.4463	3.35231	NA	NA	NA	NA	te53431,te53432,te53433
Cluster_19542	scaffold_4	5293375	5293672	82.4193	0.811641	13.132	13.5105	27.5259	3.56324	NA	NA	NA	NA	te53451
Cluster_19545	scaffold_4	5297635	5298285	65.3953	5.94456	16.531	16.492	21.3234	117.167	NA	NA	NA	NA	te53463
Cluster_19593	scaffold_4	5337600	5338232	175.251	3.4389	21.6377	2.12013	18.9393	42.7757	NA	NA	NA	NA	te53494
Cluster_19595	scaffold_4	5341721	5342535	34.1543	1.78063	7.20245	24.7001	13.9357	114.436	NA	NA	NA	NA	te53499,te53500
Cluster_19616	scaffold_4	5378451	5380344	89.2615	2.80946	8.78123	0.708575	11.9932	8.12922	NA	NA	NA	NA	te53553,te53554,te53555,te53556
Cluster_19617	scaffold_4	5380664	5380835	257.033	8.43729	56.8798	7.80256	51.3587	119.355	NA	NA	NA	NA	te53556
Cluster_19620	scaffold_4	5381419	5382282	34.1124	0	5.66165	0	5.11209	19.0493	NA	NA	NA	NA	te53558
Cluster_19663	scaffold_4	5430861	5431843	34.5636	3.69078	9.95252	1.36525	26.3175	12.2424	Carubv10023798m.g	AT3G44240	0	Polynucleotidyl transferase, ribonuclease H-like superfamily protein	te53622
Cluster_19665	scaffold_4	5433052	5433428	82.5214	0	5.19009	0	26.7789	23.0019	NA	NA	NA	NA	te53626,te53627,te53628
Cluster_19675	scaffold_4	5440820	5441216	161.884	305.23	150.323	13.5218	3.17873	0.445779	NA	NA	NA	NA	NA
Cluster_19695	scaffold_4	5456026	5456928	29.9192	3.48206	14.0845	0	16.0714	9.40726	NA	NA	NA	NA	te53664,te53665
Cluster_19729	scaffold_4	5494161	5494717	101.419	0.434235	10.5386	0	18.125	6.03682	NA	NA	NA	NA	te53710,te53711,te53712
Cluster_19730	scaffold_4	5494833	5496440	92.6637	1.20333	8.51782	0	21.1896	5.50293	NA	NA	NA	NA	te53714
Cluster_19731	scaffold_4	5496522	5496770	92.0625	0.971362	7.8581	0	20.2724	4.97518	NA	NA	NA	NA	NA
Cluster_19733	scaffold_4	5497105	5497721	40.4705	0.392008	3.17126	0	5.11327	1.43415	NA	NA	NA	NA	NA
Cluster_19749	scaffold_4	5517168	5518014	57.5119	7.71011	45.0472	33.2737	78.9654	96.3224	NA	NA	NA	NA	te53753,te53754
Cluster_19758	scaffold_4	5523497	5524774	961.234	8.70577	43.6346	660.519	774.652	26.3107	NA	NA	NA	NA	te53766,te53767,te53768
Cluster_19899	scaffold_4	5714304	5715852	43.604	2.34218	8.84226	6.93113	12.6277	11.7678	NA	NA	NA	NA	te53978,te53979,te53980
Cluster_19900	scaffold_4	5716000	5716868	66.8902	0.556661	4.50326	0	7.98706	3.8694	NA	NA	NA	NA	NA
Cluster_19901	scaffold_4	5716953	5718174	54.2673	1.3855	8.8066	0	5.16349	3.62058	NA	NA	NA	NA	te53981,te53982
Cluster_19965	scaffold_4	5816111	5816523	96.1426	4.68512	37.9015	0	35.1392	149.978	NA	NA	NA	NA	te54099,te54098
Cluster_20022	scaffold_4	5916233	5916679	349.824	14.6095	45.9619	108.084	108.692	0.79183	NA	NA	NA	NA	NA
Cluster_20026	scaffold_4	5925760	5926572	4321.08	1813.87	4312.85	6180.32	9678.88	9.79561	NA	NA	NA	NA	NA
Cluster_20043	scaffold_4	5946252	5946917	4183.23	304.334	4805	6002.91	6974.87	19.6638	NA	NA	NA	NA	NA
Cluster_20122	scaffold_4	6063245	6065252	23.6477	1.32498	7.79548	0.668347	11.6266	40.8063	NA	NA	NA	NA	te36739,te36740
Cluster_20143	scaffold_4	6088695	6090366	477.656	2132.12	60.2681	7.2239	6.41545	8.99689	Carubv10025673m.g	AT2G27530	PGY1	Ribosomal protein L1p/L10e family	te36771,te36772
Cluster_20162	scaffold_4	6141206	6142137	115.514	127.682	131.214	0	0.677015	8.73477	NA	NA	NA	NA	NA
Cluster_20193	scaffold_4	6226983	6227509	45.0517	7.34327	72.4003	2.54657	1.1973	940.28	NA	NA	NA	NA	NA
Cluster_20216	scaffold_4	6296250	6296622	76.8216	26.5861	36.7203	0	1.69163	2.37231	NA	NA	NA	NA	te36973,te36974
Cluster_20231	scaffold_4	6309226	6310070	82.3543	10.5907	68.3096	0	1.49344	0	NA	NA	NA	NA	te36988
Cluster_20235	scaffold_4	6313080	6313207	265.437	9.44801	15.2865	0	49.2952	59.4522	NA	NA	NA	NA	te36998
Cluster_20248	scaffold_4	6359032	6359284	187.686	55.4482	150.81	0	34.9158	489.652	NA	NA	NA	NA	te37036,te37037
Cluster_20312	scaffold_4	6549738	6550416	48.2297	1.06864	2.88169	0	13.0099	0	NA	NA	NA	NA	te37231
Cluster_20322	scaffold_4	6578600	6578913	159.047	0	18.6943	0	18.0854	116.668	NA	NA	NA	NA	te37247
Cluster_20351	scaffold_4	6660242	6661320	38.3172	1.56912	18.1341	0	8.77171	111.203	NA	NA	NA	NA	te37333,te37334
Cluster_20470	scaffold_4	7013526	7014144	52.9046	2.73519	9.48303	0	0	0	NA	NA	NA	NA	NA
Cluster_20559	scaffold_4	7342754	7344305	16.0891	2.64934	13.2378	12.106	28.0525	5.47343	Carubv10025490m.g	AT3G42060	0	myosin heavy chain-related	te59978,te59979
Cluster_20619	scaffold_4	7499196	7499720	555.935	57.1272	519.914	0	0	1.68547	NA	NA	NA	NA	te60107
Cluster_20667	scaffold_4	7641345	7642177	27.0279	12.7758	54.0256	0	6.81729	43.5531	NA	NA	NA	NA	NA
Cluster_20706	scaffold_4	7801851	7802763	26.0047	538.576	7.50091	0	2.07331	36.2477	NA	NA	NA	NA	te60317
Cluster_20950	scaffold_4	9310957	9311897	157.041	148.052	101.888	1.42619	0	0.752281	NA	NA	NA	NA	te32319,te32320
Cluster_20953	scaffold_4	9312729	9313354	201.405	270.074	53.1363	8.57534	1.00795	0.282706	NA	NA	NA	NA	NA
Cluster_20969	scaffold_4	9410651	9411135	47.2651	21.4441	28.2405	0	18.2138	479.837	NA	NA	NA	NA	te32372
Cluster_20982	scaffold_4	9468519	9469067	81.2734	37.0073	53.4608	12.2226	103.439	81.5564	Carubv10023777m.g	AT2G34540	0	0	NA
Cluster_20989	scaffold_4	9487154	9487605	191.996	3.21065	110.387	0	0	0	NA	NA	NA	NA	NA
Cluster_20990	scaffold_4	9487885	9489188	256.157	4.45158	203.319	1.02917	0	0	Carubv10025195m.g	AT2G34610	0	0	NA
Cluster_21098	scaffold_4	10059081	10060896	1022.02	355.079	999.343	0.739009	1.38982	1.16943	Carubv10025487m.g	AT2G35990	0	Putative lysine decarboxylase family protein	te79866
Cluster_21163	scaffold_4	10310348	10311865	84.4047	116.792	12.8898	0.884085	0.831328	0	Carubv10025148m.g	AT2G36560	0	AT hook motif DNA-binding family protein	NA
Cluster_21164	scaffold_4	10312081	10313248	240.773	580.859	32.6669	0	0	0	Carubv10025148m.g, Carubv10025529m.g	AT2G36560, AT2G36560	0	AT hook motif DNA-binding family protein, AT hook motif DNA-binding family protein	te80002
Cluster_21165	scaffold_4	10313575	10317027	2739.31	4068.7	432.926	449.679	763.825	1.99884	Carubv10025529m.g	AT2G36560	0	AT hook motif DNA-binding family protein	te80004,te80005,te80006,te80007,te80008,te80009
Cluster_21178	scaffold_4	10367051	10367530	191.883	167.293	346.493	0	1.31454	1.10609	Carubv10025222m.g	AT2G36700	0	Pectin lyase-like superfamily protein	NA
Cluster_21179	scaffold_4	10367648	10368505	1579.67	878.114	1874.57	1.56415	0.735406	0.206264	Carubv10025222m.g	AT2G36700	0	Pectin lyase-like superfamily protein	te80025
Cluster_21180	scaffold_4	10368619	10369726	560.454	311.505	668.41	1.21123	0	0.638896	NA	NA	NA	NA	te80026
Cluster_21214	scaffold_4	10543179	10543804	248.487	211.732	209.419	0	2.0159	26.5744	NA	NA	NA	NA	te80119,te80120,te80121
Cluster_21216	scaffold_4	10544135	10544560	573.666	513.262	413.38	0	0	0.415432	NA	NA	NA	NA	NA
Cluster_21258	scaffold_4	10807593	10808100	1274.78	19.5209	766.489	26.4181	1121.6	114.267	NA	NA	NA	NA	te80253
Cluster_21278	scaffold_4	10891971	10892874	234.108	210.03	422.068	2.96912	0	0.783071	NA	NA	NA	NA	te80301,te80302
Cluster_21279	scaffold_4	10892954	10893830	2803.83	2526.53	3327.67	6.12105	2.87789	10.4933	NA	NA	NA	NA	NA
Cluster_21317	scaffold_4	11081291	11081981	31.9897	42.3533	31.1481	0	0	0.512226	NA	NA	NA	NA	NA
Cluster_21318	scaffold_4	11082089	11083101	1474.95	306.574	1752.89	2.64964	13.0805	50.6639	Carubv10023760m.g	AT2G38270	ATGRX2,CXIP2	CAX-interacting protein 2	NA
Cluster_21323	scaffold_4	11100794	11102088	3999.61	654.447	4838.78	4.1453	4.87242	14.3493	NA	NA	NA	NA	te22553
Cluster_21434	scaffold_4	11810567	11811001	56.462	0	92.2107	0	13.0547	0	Carubv10025569m.g	AT2G39975	0	0	NA
Cluster_21451	scaffold_4	11901936	11902456	63.6416	9.2848	73.2341	0	7.26654	168.822	NA	NA	NA	NA	te22928
Cluster_21572	scaffold_4	12592440	12592889	163.74	392.365	165.23	2.98231	36.4565	0	Carubv10024233m.g, Carubv10023800m.g	AT2G41500	EMB2776,0	WD-40 repeat family protein / small nuclear ribonucleoprotein Prp4p-related, Ribosomal protein S5 family protein	NA
Cluster_21642	scaffold_4	13003788	13004035	89.1325	0	82.8427	0	0	0	NA	NA	NA	NA	NA
Cluster_21669	scaffold_4	13135796	13136790	67.4707	19.2037	44.2462	0	12.0488	114.01	NA	NA	NA	NA	te96929,te96930
Cluster_21677	scaffold_4	13180110	13181190	358.985	441.003	180.1	1.24148	2.33479	0.49114	Carubv10023282m.g	AT2G43260	0	F-box and associated interaction domains-containing protein	te96948,te96949
Cluster_21678	scaffold_4	13181396	13182103	289.089	581.101	44.2184	0	0	0	Carubv10024069m.g	AT2G43280	0	Far-red impaired responsive (FAR1) family protein	te96950
Cluster_21791	scaffold_4	13733249	13733839	122.597	20.872	77.8031	54.4991	89.6822	193.743	NA	NA	NA	NA	te97259,te97260
Cluster_21819	scaffold_4	13977850	13978512	154.972	43.7772	265.611	0	35.213	226.623	NA	NA	NA	NA	te42613,te42614,te42615
Cluster_21848	scaffold_4	14121573	14122814	49.1087	16.9425	10.2402	0	9.65264	106.441	NA	NA	NA	NA	te42681,te42682,te42683
Cluster_22021	scaffold_4	14805483	14805684	133.748	9.57897	164.67	6.64376	93.7096	484.489	NA	NA	NA	NA	te43111
Cluster_22105	scaffold_5	57818	58585	36.2445	1.25973	19.1081	0	19.7181	235.965	NA	NA	NA	NA	te69123
Cluster_22149	scaffold_5	274548	274984	104.913	1122.45	8.95499	9.21309	0	0	NA	NA	NA	NA	NA
Cluster_22256	scaffold_5	652886	654261	108.882	48.1629	246.716	228.225	371.433	9.26027	Carubv10017841m.g, Carubv10019221m.g	AT2G02740, AT2G02750	ATWHY3,0	ssDNA-binding transcriptional regulator, Pentatricopeptide repeat (PPR) superfamily protein	NA
Cluster_22268	scaffold_5	690392	691217	1933.75	8672.73	360.064	81.2373	13.7501	0.214254	Carubv10018193m.g	AT2G02850	ARPN	plantacyanin	te6386
Cluster_22269	scaffold_5	691517	692329	1794.99	4062.39	316.484	64.3783	25.6117	0.21768	Carubv10018193m.g	AT2G02850	ARPN	plantacyanin	te6387
Cluster_22274	scaffold_5	701601	701806	812.737	66.9249	1287.03	13.0295	58.197	1235.38	NA	NA	NA	NA	NA
Cluster_22388	scaffold_5	1074550	1074729	195.578	1.34372	358.722	0	0	0	Carubv10017373m.g	AT2G03530	ATUPS2,UPS2	ureide permease 2	NA
Cluster_22389	scaffold_5	1075021	1075352	87.5416	10.1993	82.51	0	9.50268	53.8385	NA	NA	NA	NA	NA
Cluster_22394	scaffold_5	1081777	1083127	255.427	82.7117	65.1739	0.993368	0.467045	0	Carubv10017195m.g	AT3G59610	0	F-box family protein / jacalin lectin family protein	te6720
Cluster_22396	scaffold_5	1083799	1084376	153.683	71.5564	23.6966	2.32187	0	0	NA	NA	NA	NA	NA
Cluster_22397	scaffold_5	1084562	1086365	953.711	506.933	878.005	1.48785	0	0.196202	NA	NA	NA	NA	te6724,te6725
Cluster_22398	scaffold_5	1086489	1087538	2878.31	464.849	4348.46	3.8344	1.80279	0.50564	NA	NA	NA	NA	te6726,te6727
Cluster_22399	scaffold_5	1087616	1088234	91.2604	2438.23	18.9661	0	2.0387	0.285903	NA	NA	NA	NA	te6728
Cluster_22401	scaffold_5	1089443	1091909	47.1241	272.164	3.17254	0.543997	0.767302	0.286946	Carubv10019200m.g	AT3G59610	0	F-box family protein / jacalin lectin family protein	te6731,te6732,te6733
Cluster_22402	scaffold_5	1092519	1094065	785.358	964.193	381.341	1.73502	8.97319	24.8244	NA	NA	NA	NA	te6735,te6736
Cluster_22403	scaffold_5	1094501	1096747	240.29	689.548	42.2333	0	0.561618	0.236281	Carubv10017570m.g	AT2G03550	0	alpha/beta-Hydrolases superfamily protein	te6736,te6737,te6738
Cluster_22429	scaffold_5	1173021	1174471	541.097	2281.34	317.57	2.77472	2.60914	0.121967	NA	NA	NA	NA	te6798,te6799,te6800,te6801
Cluster_22430	scaffold_5	1174571	1175525	134.592	841.35	47.1239	1.40528	1.32142	0	NA	NA	NA	NA	te6802,te6803
Cluster_22443	scaffold_5	1208073	1208364	82.711	22.3646	60.3082	0	0	0	Carubv10018570m.g	AT2G03936	0	Defensin-like (DEFL) family protein	NA
Cluster_22444	scaffold_5	1208578	1208860	99.806	110.251	89.8822	0	0	0	NA	NA	NA	NA	te6826
Cluster_22446	scaffold_5	1209481	1210065	582.186	415.519	613.758	0	3.23579	2.42016	Carubv10019036m.g	AT2G03930	0	Protein of Unknown Function (DUF239)	NA
Cluster_22453	scaffold_5	1225280	1225642	65.4057	39.9784	88.9394	0	1.73823	2.43766	NA	NA	NA	NA	te6853
Cluster_22465	scaffold_5	1254945	1255111	524.555	531.533	158.174	0	0	0	NA	NA	NA	NA	NA
Cluster_22466	scaffold_5	1255441	1255912	3617.36	834.756	1411.54	28.4331	18.7155	0.74989	NA	NA	NA	NA	te6871,te6872
Cluster_22467	scaffold_5	1256005	1258116	879.752	1777.6	284.884	6.35436	4.18262	26.4791	Carubv10019170m.g	AT2G04925	0	Putative membrane lipoprotein	te6872,te6873,te6874,te6875,te6876
Cluster_22479	scaffold_5	1274193	1274890	385.304	3.81169	228.465	1.92269	0	0	Carubv10019351m.g	AT2G04046	0	Defensin-like (DEFL) family protein	NA
Cluster_22480	scaffold_5	1275021	1275706	360.418	2.82063	144.04	17.6069	5.51876	0	Carubv10019351m.g	AT2G04046	0	Defensin-like (DEFL) family protein	NA
Cluster_22534	scaffold_5	1404276	1404586	461.999	328.973	298.848	0	4.05774	212.255	NA	NA	NA	NA	te7009
Cluster_22535	scaffold_5	1404897	1405138	140.397	142.923	133.409	0	5.2147	0	NA	NA	NA	NA	NA
Cluster_22568	scaffold_5	1549223	1550562	27.7991	10.6495	17.5224	0	8.00495	111.467	NA	NA	NA	NA	te66122,te66123
Cluster_22683	scaffold_5	1842570	1844520	1422.55	546.344	1452.71	0	1.61706	3.17483	NA	NA	NA	NA	te66347,te66348,te66349
Cluster_22712	scaffold_5	1941790	1941824	8982.29	518.291	1257.86	8282.31	13304.6	0	NA	NA	NA	NA	NA
Cluster_22715	scaffold_5	1946777	1947432	73.009	3.68703	58.1631	0	9.61857	502.326	NA	NA	NA	NA	te66460,te66461
Cluster_22780	scaffold_5	2161620	2161758	809.864	196.627	527.877	0	172.498	22.9175	NA	NA	NA	NA	te66600
Cluster_22925	scaffold_5	2562174	2562725	1118.3	88.0719	3645.71	6087.81	5054.68	654.676	NA	NA	NA	NA	NA
Cluster_23032	scaffold_5	2801346	2802636	181.052	921.763	20.4609	0	0.488751	13.16	Carubv10018042m.g	AT3G28210	PMZ,SAP12	zinc finger (AN1-like) family protein	te9404
Cluster_23122	scaffold_5	3062284	3062689	105.866	93.5307	96.3875	0	0	0.435897	NA	NA	NA	NA	NA
Cluster_23145	scaffold_5	3098551	3100150	34.0272	0.907009	2.44583	0	10.6478	3.98192	Carubv10016555m.g	AT3G28770	0	Protein of unknown function (DUF1216)	te9673,te9674,te9675,te9676,te9677
Cluster_23148	scaffold_5	3109201	3109845	43.7909	1.12497	1.5168	2.08068	5.86956	17.2858	NA	NA	NA	NA	te9688,te9689
Cluster_23150	scaffold_5	3110126	3110824	74.9595	0	8.39771	0	25.2752	12.4059	NA	NA	NA	NA	te9690,te9691
Cluster_23151	scaffold_5	3110902	3111535	38.094	0	3.08622	0	4.97617	4.46622	NA	NA	NA	NA	te9692,te9693
Cluster_23198	scaffold_5	3202525	3203222	45.1575	1032.97	1.40162	3.84539	4.5199	0	Carubv10018759m.g	AT3G28917	MIF2	mini zinc finger 2	te9811
Cluster_23202	scaffold_5	3205923	3207369	52.9014	1.67152	17.5789	0	26.1636	174.895	NA	NA	NA	NA	te9814,te9815,te9816,te9817,te9818,te9819
Cluster_23253	scaffold_5	3313073	3313451	78.8457	0	0	0	0	8.4051	NA	NA	NA	NA	te9950
Cluster_23335	scaffold_5	3443944	3446645	11.3624	0.447574	7.60362	0	12.3767	19.2563	NA	NA	NA	NA	te10180
Cluster_23405	scaffold_5	3518378	3519268	41.8078	1.08583	7.68612	0	2.12451	69.9157	NA	NA	NA	NA	te45592
Cluster_23456	scaffold_5	3585816	3586913	74.5627	18.9442	7.12811	0	12.0679	20.792	NA	NA	NA	NA	te45662,te45663,te45664
Cluster_23480	scaffold_5	3613711	3615319	59.7869	4.35936	14.5929	2.50225	26.2744	50.1555	NA	NA	NA	NA	te45702
Cluster_23582	scaffold_5	3728768	3729378	56.2772	42.3568	54.4408	19.7682	89.8447	83.1286	NA	NA	NA	NA	NA
Cluster_23611	scaffold_5	3760222	3761447	51.753	5.72121	27.1316	40.502	127.122	10.682	NA	NA	NA	NA	te45860,te45861,te45862
Cluster_23626	scaffold_5	3773280	3774521	27.3559	10.1266	7.08937	0	4.57231	20.0913	NA	NA	NA	NA	te45873
Cluster_23637	scaffold_5	3790103	3791063	83.9145	1.76179	12.2164	5.58602	55.8097	8.28703	NA	NA	NA	NA	te45892,te45893,te45894
Cluster_23638	scaffold_5	3791329	3791794	63.2471	1.5571	4.19885	0	10.8322	3.79773	NA	NA	NA	NA	te45895
Cluster_23639	scaffold_5	3791946	3792657	52.8935	0	2.74813	0	2.65862	1.49135	NA	NA	NA	NA	te45896
Cluster_23640	scaffold_5	3792751	3793812	56.2759	1.59424	3.68487	0	7.1297	3.66613	NA	NA	NA	NA	te45897,te45898
Cluster_23663	scaffold_5	3826721	3827965	34.8522	0.582817	6.28648	0	3.54767	31.4147	NA	NA	NA	NA	te45922
Cluster_23679	scaffold_5	3843904	3844455	45.9776	0.438169	8.86171	0	4.57231	18.5951	NA	NA	NA	NA	NA
Cluster_23709	scaffold_5	3875658	3877975	13.5979	1.6695	7.175	4.05275	11.1605	36.1125	Carubv10019236m.g	0	0	0	te45991,te45992,te45993
Cluster_23711	scaffold_5	3879952	3881212	26.2944	2.4935	13.9651	74.4987	118.089	35.2264	NA	NA	NA	NA	te45993
Cluster_23713	scaffold_5	3885492	3886111	130.728	6.24178	100.989	32.4687	104.824	223.216	NA	NA	NA	NA	te45999,te46000
Cluster_23754	scaffold_5	3933041	3935968	295.408	895.857	65.1554	0.916694	0.646494	4.04961	Carubv10019051m.g	AT3G29830	0	F-box/RNI-like superfamily protein	te46068,te46069,te46070,te46071
Cluster_23763	scaffold_5	3943863	3945623	14.6445	2.47226	10.5556	0	22.9316	7.23574	NA	NA	NA	NA	te46077
Cluster_23795	scaffold_5	3975028	3975910	28.7425	1730.88	2.21593	3.03973	6.43126	54.3148	NA	NA	NA	NA	te46103,te46104
Cluster_23857	scaffold_5	4068376	4069420	106.548	2.08308	11.2344	1.28425	28.9827	4.23383	Carubv10018593m.g	AT2G40116	0	Phosphoinositide-specific phospholipase C family protein	te46216
Cluster_23861	scaffold_5	4071477	4071805	75.8976	0	0	0	28.768	2.15166	NA	NA	NA	NA	NA
Cluster_23891	scaffold_5	4099900	4101060	34.2006	0.833313	2.52799	0	7.60869	7.01189	NA	NA	NA	NA	te46240,te46241
Cluster_23900	scaffold_5	4105199	4106081	29.2061	1.91742	4.43186	0	9.2896	2.00424	NA	NA	NA	NA	NA
Cluster_23936	scaffold_5	4155174	4156313	20.8265	3.60682	6.00731	0	49.2606	0.310481	NA	NA	NA	NA	te46320
Cluster_23945	scaffold_5	4160663	4161496	34.3579	1.74007	24.6343	8.04581	38.585	202.226	NA	NA	NA	NA	te46324,te46325
Cluster_23948	scaffold_5	4163062	4165209	29.5387	3.04025	32.7933	4.99829	16.4501	18.6202	NA	NA	NA	NA	te46327,te46328
Cluster_23951	scaffold_5	4167238	4169807	22.777	1.03524	11.4202	2.61097	15.9586	14.2543	Carubv10018876m.g	AT4G05320	UBQ10	polyubiquitin 10	te46331,te46332,te46333,te46334,te46335
Cluster_24029	scaffold_5	4270625	4271641	47.4958	0.237826	2.88594	0	17.9925	1.56614	NA	NA	NA	NA	te46455
Cluster_24030	scaffold_5	4271790	4273002	60.4069	0.199397	8.87194	0	20.8072	0	NA	NA	NA	NA	te46456,te46457
Cluster_24124	scaffold_5	4359218	4359893	56.9214	1.43118	10.1307	0	10.2674	2.87976	NA	NA	NA	NA	NA
Cluster_24208	scaffold_5	4431146	4431279	168.017	1.80499	0	0	51.7967	129.429	NA	NA	NA	NA	NA
Cluster_24229	scaffold_5	4442949	4444076	28.3061	0.214423	11.2751	0	21.8157	3.45162	NA	NA	NA	NA	te46631
Cluster_24360	scaffold_5	4600566	4601151	47.5013	0	6.67804	0	8.61404	0.302004	NA	NA	NA	NA	te94169,te94170
Cluster_24369	scaffold_5	4614551	4616157	15.7932	0.451529	1.82638	0	4.31908	18.8317	NA	NA	NA	NA	te94188,te94189,te94190
Cluster_24371	scaffold_5	4617279	4618272	26.7683	5.8399	11.8109	0	8.25223	9.97037	NA	NA	NA	NA	te94194,te94195
Cluster_24383	scaffold_5	4632200	4632442	99.3894	11.9442	60.3909	11.0456	70.1087	8.73946	NA	NA	NA	NA	te94206
Cluster_24480	scaffold_5	4785972	4787050	33.0059	0.448321	1.81341	0	1.16956	4.59247	NA	NA	NA	NA	te94370,te94371,te94372,te94373
Cluster_24481	scaffold_5	4787128	4787613	118.762	0.995346	0	0	16.878	9.8319	NA	NA	NA	NA	te94373,te94374
Cluster_24537	scaffold_5	4908978	4909192	133.277	0	13.6512	49.9364	123.261	162.981	NA	NA	NA	NA	te94516
Cluster_24547	scaffold_5	4917662	4918042	77.3574	1.26965	2.5678	0	11.5928	131.453	NA	NA	NA	NA	te94520
Cluster_24625	scaffold_5	5022656	5023811	25.1417	4.39382	11.8483	77.7826	135.911	3.21493	NA	NA	NA	NA	te94627,te94628,te94629
Cluster_24626	scaffold_5	5023923	5024874	49.4487	6.3516	23.6362	35.2427	296.268	6.13461	NA	NA	NA	NA	te94630,te94631
Cluster_24629	scaffold_5	5027373	5028876	19.3243	0.482452	7.15536	0	6.293	5.88345	NA	NA	NA	NA	te94635,te94636,te94637
Cluster_24633	scaffold_5	5030800	5033406	23.2389	0.556661	1.50109	0	4.35658	12.287	Carubv10018773m.g, Carubv10018914m.g	AT3G42780, AT3G42786	0,0	0,0	te94641,te94642,te94643,te94644,te94645,te94646
Cluster_24636	scaffold_5	5039958	5040762	84.4124	2.10321	4.86128	1.66713	13.325	51.4434	NA	NA	NA	NA	te94653,te94654
Cluster_24637	scaffold_5	5040858	5041230	127.304	4.5391	31.4745	0	20.2996	91.5711	NA	NA	NA	NA	te94654,te94655
Cluster_24721	scaffold_5	5141877	5142827	30.5613	1.27166	0	0	3.98093	9.49073	NA	NA	NA	NA	te94787,te94788,te94789
Cluster_24735	scaffold_5	5158579	5162579	16.8814	2.35763	8.06923	0.335426	15.7705	4.86557	NA	NA	NA	NA	te94808,te94809,te94810,te94811,te94812
Cluster_24747	scaffold_5	5175482	5175642	139.84	0	30.383	0	66.625	26.3812	NA	NA	NA	NA	te94826
Cluster_24755	scaffold_5	5181455	5181722	123.721	34.2949	58.4079	0	35.3159	58.1109	NA	NA	NA	NA	te94832
Cluster_24761	scaffold_5	5187158	5187758	37.4613	0	4.88353	0	3.14964	18.2569	NA	NA	NA	NA	te94833
Cluster_24778	scaffold_5	5202427	5203491	23.8307	0.227107	3.67449	0	2.96234	7.9763	NA	NA	NA	NA	te94839
Cluster_24824	scaffold_5	5276304	5278842	139.943	10.2882	73.5965	123.157	98.6602	158.642	NA	NA	NA	NA	te94937,te94938
Cluster_24841	scaffold_5	5300877	5301976	45.4006	5.71691	22.2348	12.2004	106.693	260.956	NA	NA	NA	NA	te94962,te94963,te94964
Cluster_24856	scaffold_5	5312813	5313850	43.7744	11.6507	21.6779	11.6362	152.578	163.846	NA	NA	NA	NA	te94973,te94974
Cluster_24901	scaffold_5	5368348	5370421	19.3424	1.39944	11.7928	0	13.9947	34.7292	NA	NA	NA	NA	te95054,te95055
Cluster_24951	scaffold_5	5418707	5420077	36.4264	1.76418	29.2572	0	2.76139	11.1012	NA	NA	NA	NA	te95095,te95096,te95097
Cluster_24984	scaffold_5	5477155	5478322	71.496	9.73275	17.5899	1.14901	18.9077	31.819	NA	NA	NA	NA	te95155,te95156
Cluster_24985	scaffold_5	5478450	5479744	61.0073	3.17512	13.5984	0	23.8748	12.9827	NA	NA	NA	NA	te95157,te95158,te95159
Cluster_24993	scaffold_5	5487266	5487966	48.4679	0.345034	2.79125	7.65786	17.1021	15.9049	NA	NA	NA	NA	te95166,te95167,te95168,te95169,te95170
Cluster_25016	scaffold_5	5563677	5564025	68.0294	3.46517	14.0162	0	7.23184	6.59216	Carubv10019454m.g	AT1G35540	ARF14	auxin response factor 14	NA
Cluster_25045	scaffold_5	5646560	5646728	135.642	2.86236	109.99	0	63.4712	7.33029	NA	NA	NA	NA	NA
Cluster_25099	scaffold_5	5770704	5771929	47.0785	1.38098	1.59598	0	3.08798	8.228	NA	NA	NA	NA	te14134,te14135,te14136,te14137
Cluster_25178	scaffold_5	5888861	5889320	1823.38	3236.31	1841.82	8.75244	6.85846	3.84726	NA	NA	NA	NA	NA
Cluster_25187	scaffold_5	5905607	5906049	57.2904	15.2874	26.5011	0	4.27299	67.1143	NA	NA	NA	NA	te14290
Cluster_25188	scaffold_5	5907087	5907575	3959.56	1439.34	4309.47	2.74446	0	0	Carubv10018568m.g	AT2G27410	0	Domain of unknown function (DUF313)	NA
Cluster_25257	scaffold_5	6059812	6060271	2556.65	1115.75	2348	0	4.11507	3.84726	NA	NA	NA	NA	NA
Cluster_25369	scaffold_5	6396920	6397350	86.4288	127.949	77.1771	0	0	0	NA	NA	NA	NA	NA
Cluster_25370	scaffold_5	6397465	6398240	783.883	1029.5	602.633	0	1.62623	2.96477	NA	NA	NA	NA	NA
Cluster_25393	scaffold_5	6464956	6466529	82.442	5.22462	50.3462	0	28.4622	53.0697	NA	NA	NA	NA	te14828,te14829
Cluster_25406	scaffold_5	6484319	6484465	757.436	495.256	512.46	0	0	2.40781	NA	NA	NA	NA	NA
Cluster_25407	scaffold_5	6484602	6485381	269.751	171.169	282.211	0	1.61789	0.90756	NA	NA	NA	NA	te14847,te14848
Cluster_25408	scaffold_5	6485678	6486285	606.618	286.026	558.358	4.41461	1.03779	1.1643	NA	NA	NA	NA	NA
Cluster_25419	scaffold_5	6509327	6510030	72.1013	33.3257	1.38968	0	1.79255	0.754151	NA	NA	NA	NA	NA
Cluster_25420	scaffold_5	6510234	6510720	121.04	286.071	6.02669	0	3.88693	0.363397	NA	NA	NA	NA	te37659,te37660
Cluster_25450	scaffold_5	6577282	6578918	249.311	1997.16	31.0772	0.819817	0.770896	0.108109	Carubv10018608m.g	AT3G45245	0	ECA1 gametogenesis related family protein	te37746,te37747
Cluster_25451	scaffold_5	6579035	6580165	40.8987	1818.62	5.19009	1.1866	2.23158	1.25181	Carubv10018881m.g	AT3G45245	0	ECA1 gametogenesis related family protein	te37749
Cluster_25532	scaffold_5	6799702	6799920	1334.59	132.531	3949.07	269.634	3927.05	0	NA	NA	NA	NA	NA
Cluster_25550	scaffold_5	6867287	6869218	546.011	299.833	201.541	2.08391	5.22549	17.1295	Carubv10017326m.g	AT2G39570	0	ACT domain-containing protein	te37995,te37996
Cluster_25555	scaffold_5	6878207	6878701	67.8114	11.2384	47.4343	0	30.5929	191.633	NA	NA	NA	NA	NA
Cluster_25576	scaffold_5	6908244	6908887	153.188	100.654	85.0724	0	6.85846	20.8851	NA	NA	NA	NA	te38018
Cluster_25592	scaffold_5	6939496	6940427	36.4549	2.33565	3.14914	0	2.03105	16.8999	NA	NA	NA	NA	te38034
Cluster_25632	scaffold_5	7081102	7081438	85.0281	12.9188	95.8011	0	22.4681	1041.89	NA	NA	NA	NA	te38141
Cluster_25641	scaffold_5	7096605	7097612	22.3355	1.19975	11.6468	3.99417	16.9012	82.8688	Carubv10018298m.g	0	0	0	te38158
Cluster_25647	scaffold_5	7101403	7102379	3811.94	2605.85	5019.84	2.74727	1.29166	5.43421	NA	NA	NA	NA	te38164
Cluster_25660	scaffold_5	7123963	7124322	759.571	362.132	4500.33	3988.84	6206.37	0.491595	Carubv10018545m.g	AT5G38140	NF-YC12	nuclear factor Y, subunit C12	NA
Cluster_25675	scaffold_5	7138590	7139001	158.971	102.149	1533.99	1309.47	1710.69	0.429549	Carubv10018749m.g	AT5G38140	NF-YC12	nuclear factor Y, subunit C12	NA
Cluster_25676	scaffold_5	7139302	7139553	214.421	156.447	2212.9	1741.46	2418.75	0	NA	NA	NA	NA	NA
Cluster_25678	scaffold_5	7143350	7144507	48.4291	8.56359	19.4315	1.15893	4.35909	66.1743	NA	NA	NA	NA	te38216,te38217,te38218,te38219,te38220,te38215
Cluster_25682	scaffold_5	7150700	7150940	3123.62	1907.86	26305.4	16043.2	30423.1	0	NA	NA	NA	NA	NA
Cluster_25736	scaffold_5	7276148	7276906	47.4608	1.59334	15.4677	7.07268	12.4699	44.7682	NA	NA	NA	NA	NA
Cluster_25894	scaffold_5	7891221	7892395	93.3665	691.643	19.983	2.28432	0.537003	0.301233	NA	NA	NA	NA	te26399
Cluster_25905	scaffold_5	7910920	7911897	2373.64	312.847	2818.96	2.74446	0	0	Carubv10019125m.g	AT3G48230	0	Protein of Unknown Function (DUF239)	NA
Cluster_25906	scaffold_5	7911985	7912439	22669.9	3318.12	42851	14.7477	15.2544	0.388954	NA	NA	NA	NA	te26424
Cluster_25907	scaffold_5	7912593	7913599	293.902	10.5683	388.613	0	0	0	Carubv10018697m.g	AT5G35600	HDA7	histone deacetylase7	NA
Cluster_26071	scaffold_5	8628021	8628641	406.053	118.403	398.58	0	1.01607	0.284982	NA	NA	NA	NA	NA
Cluster_26072	scaffold_5	8628737	8629716	2137.39	305.545	2246.17	2.73886	3.86313	6.50109	NA	NA	NA	NA	te90281,te90282
Cluster_26091	scaffold_5	8684865	8685454	166.515	16.3979	31.5056	0	26.7364	0	NA	NA	NA	NA	te90329,te90330,te90331,te90332
Cluster_26126	scaffold_5	8865701	8866033	73.7566	5.81067	61.6967	0	30.3173	107.354	NA	NA	NA	NA	te90432
Cluster_26135	scaffold_5	8871098	8872142	34.0798	0.231454	42.1292	1.28425	11.4723	116.684	NA	NA	NA	NA	te90435,te90436
Cluster_26147	scaffold_5	8914292	8915781	2162.41	0.162328	1522.65	0	2.96433	0.593873	Carubv10018679m.g	AT3G50670	U1-70K,U1SNRNP	U1 small nuclear ribonucleoprotein-70K	te90467,te90468
Cluster_26148	scaffold_5	8915874	8916314	202.354	0	62.1164	0	1.43079	0	NA	NA	NA	NA	NA
Cluster_26217	scaffold_5	9168841	9169058	1579.19	1.10949	5066.69	6.15615	11.5776	0	NA	NA	NA	NA	NA
Cluster_26228	scaffold_5	9225869	9226227	133.409	23.5806	68.129	3.73827	42.1824	76.9024	NA	NA	NA	NA	te90628
Cluster_26229	scaffold_5	9227030	9227143	660.704	19.0949	514.912	0	71.9536	45.0197	NA	NA	NA	NA	te90628
Cluster_26259	scaffold_5	9354214	9354481	252.025	23.4649	58.4079	15.0228	77.6951	128.108	NA	NA	NA	NA	te90682
Cluster_26289	scaffold_5	9510000	9510300	96.5575	2.41066	39.0033	0	27.2515	284.57	NA	NA	NA	NA	NA
Cluster_26445	scaffold_5	10205793	10206351	194.789	159.227	250.271	0	0	0.316591	NA	NA	NA	NA	te18874
Cluster_26510	scaffold_5	10533961	10534832	39.9022	3.0511	47.1215	0	12.3012	158.1	NA	NA	NA	NA	te85064,te85065
Cluster_26537	scaffold_5	10650647	10652076	1333.96	547.673	10240.3	4016.74	5865.89	2.84644	Carubv10018830m.g	AT3G44810	0	F-box family protein	NA
Cluster_26584	scaffold_5	10845301	10845462	166.772	11.9442	84.5473	16.5684	70.1087	621.594	NA	NA	NA	NA	te85222
Cluster_26614	scaffold_5	11002733	11003323	51.9479	4.09254	44.6954	72.6655	54.4499	181.166	NA	NA	NA	NA	te85315,te85316
Cluster_26727	scaffold_5	11585865	11587318	29.2795	4.15868	10.0928	0	6.5094	49.0513	NA	NA	NA	NA	te61637,te61638
Cluster_26796	scaffold_5	11962873	11964258	1220.96	134.546	567.518	0.968283	0.910502	0.255374	NA	NA	NA	NA	te61847,te61848,te61849
Cluster_26797	scaffold_5	11964606	11965306	1917.69	1105.49	1035.55	0	0.900111	0.757379	NA	NA	NA	NA	te61851,te61852
Cluster_26801	scaffold_5	11992304	11992895	44.9455	1.22569	9.91554	6.80088	3.19752	45.7382	NA	NA	NA	NA	te61865
Cluster_27021	scaffold_5	13144193	13144629	65.5708	3.32086	69.4012	6.14206	8.66332	53.4567	NA	NA	NA	NA	te33983
Cluster_27149	scaffold_5	13562664	13563884	55.3175	0.594273	11.2176	2.19826	1.55031	0.144942	Carubv10018113m.g	AT3G63080	ATGPX5,GPX5,MEE42	glutathione peroxidase 5	te73802
Cluster_27214	scaffold_5	13733563	13734240	38.0369	0	46.175	0	1.86129	123.203	NA	NA	NA	NA	te73934,te73935
Cluster_27224	scaffold_6	19005	19355	120.122	66.1522	147.725	87.94	156.396	268.234	NA	NA	NA	NA	te73957,te73958
Cluster_27242	scaffold_6	99257	99560	872.561	51.7154	460.203	0	464.931	3977.26	NA	NA	NA	NA	te74004
Cluster_27253	scaffold_6	172097	172222	331.378	65.2663	434.815	937.298	956.483	67.4187	NA	NA	NA	NA	NA
Cluster_27311	scaffold_6	489129	492270	13.2889	26.8658	14.9459	29.8991	28.7173	51.256	Carubv10003889m.g	AT5G02490	0	Heat shock protein 70 (Hsp 70) family protein	te74258
Cluster_27331	scaffold_6	545405	545567	175.794	48.9674	138.047	362.269	483.879	86.8585	Carubv10001846m.g, Carubv10003262m.g	AT5G02710, AT5G02720	0,0	0,0	te10271
Cluster_27551	scaffold_6	1813466	1813827	117.603	1.33629	21.6206	0	34.8607	18.0885	NA	NA	NA	NA	te16882,te16883
Cluster_27567	scaffold_6	1946365	1947341	78.3504	10.6452	28.0382	0	9.68748	77.5281	Carubv10000815m.g	AT5G06440	0	0	te16944,te16945
Cluster_27609	scaffold_6	2246283	2246723	102.105	369.111	11.0922	0	1.43079	0	Carubv10003421m.g	AT5G07210	ARR21,RR21	response regulator 21	NA
Cluster_27610	scaffold_6	2246979	2247858	65.1238	296.29	7.78219	1.52505	3.5851	0	Carubv10003421m.g	AT5G07210	ARR21,RR21	response regulator 21	NA
Cluster_27621	scaffold_6	2309296	2309920	413.934	2264.67	34.4373	0	1.00956	0	Carubv10000847m.g	AT5G07320	0	Mitochondrial substrate carrier family protein	NA
Cluster_27622	scaffold_6	2310002	2310500	260.048	1792.93	17.6453	5.37892	0	0	NA	NA	NA	NA	te17136,te17137
Cluster_27989	scaffold_6	4128611	4130384	61.6101	57.8086	10.4782	0.756505	0.355681	0.4988	Carubv10000060m.g	AT5G13010	EMB3011	RNA helicase family protein	te79647,te79648
Cluster_28096	scaffold_6	4677740	4678703	66.6679	660.373	7.10408	2.78432	3.27271	2.57016	Carubv10002931m.g	AT5G14400	CYP724A1	cytochrome P450, family 724, subfamily A, polypeptide 1	te65693
Cluster_28121	scaffold_6	4839034	4839996	59.5108	2.0093	10.1592	0	10.4835	25.3608	NA	NA	NA	NA	te65755,te65756,te65757
Cluster_28123	scaffold_6	4840363	4840688	92.9198	2.96772	15.0051	4.11669	9.67758	84.1441	NA	NA	NA	NA	te65759,te65760,te65761
Cluster_28184	scaffold_6	5191433	5191713	171.898	9.46818	369.051	0	40.4185	312.381	NA	NA	NA	NA	NA
Cluster_28235	scaffold_6	5457908	5458303	104.405	33.5929	7.41161	0	0	0	NA	NA	NA	NA	te66040
Cluster_28245	scaffold_6	5490738	5491021	1019.05	867.833	4536.85	2060.32	3468.16	34.8963	Carubv10002350m.g	0	0	0	NA
Cluster_28246	scaffold_6	5491101	5491397	82.6968	102.611	411.756	835.951	533.251	25.0266	Carubv10002350m.g	0	0	0	NA
Cluster_28293	scaffold_6	5795736	5795997	279.67	25.8486	141.896	35.856	144.499	193.185	NA	NA	NA	NA	te1581
Cluster_28294	scaffold_6	5796195	5796710	166.596	9.84351	37.9199	15.6051	66.0326	41.4997	NA	NA	NA	NA	te1581
Cluster_28402	scaffold_6	6382120	6383930	261.749	185.509	189.616	0	0.348414	0.195444	Carubv10000255m.g	AT5G18960	FRS12	FAR1-related sequence 12	te1906
Cluster_28403	scaffold_6	6384257	6385889	6023.93	5367.78	7177.84	7.39643	5.40949	4.98519	Carubv10002111m.g	AT5G18970	0	AWPM-19-like family protein	NA
Cluster_28424	scaffold_6	6483551	6484101	113.667	74.1849	124.289	0	0	1.28475	NA	NA	NA	NA	NA
Cluster_28425	scaffold_6	6484244	6484893	551.677	620.673	802.233	0	1.94147	6.8067	NA	NA	NA	NA	NA
Cluster_28451	scaffold_6	6618340	6618489	177.385	14.5121	65.2222	0	21.0326	16.5176	NA	NA	NA	NA	NA
Cluster_28545	scaffold_6	7070070	7070287	142.709	44.3796	152.584	0	11.5776	134.76	NA	NA	NA	NA	te58349
Cluster_28548	scaffold_6	7080741	7081191	61.7201	0	65.0776	2.9757	2.79813	195.025	NA	NA	NA	NA	NA
Cluster_28602	scaffold_6	7300259	7300878	36.9735	1.56045	28.4032	0	15.2656	143.863	NA	NA	NA	NA	te58469,te58470,te58471
Cluster_28657	scaffold_6	7654684	7655956	1081.09	3079.51	239.011	4.21694	0.495662	0	Carubv10000782m.g	AT5G22860	0	Serine carboxypeptidase S28 family protein	te99516
Cluster_28658	scaffold_6	7656041	7657157	290.979	1027.46	50.7997	0	0	0	Carubv10000782m.g	AT5G22860	0	Serine carboxypeptidase S28 family protein	te99517
Cluster_28670	scaffold_6	7719564	7720174	437.488	117.966	555.616	0	0	0	NA	NA	NA	NA	NA
Cluster_28671	scaffold_6	7720333	7720804	157.842	18.4476	211.419	0	1.33682	0	NA	NA	NA	NA	NA
Cluster_28701	scaffold_6	7800759	7801130	121.044	0.650186	102.567	0	6.78471	25.6898	NA	NA	NA	NA	te99652
Cluster_28707	scaffold_6	7810359	7810587	185.905	2.11239	55.5385	0	11.0215	17.0019	NA	NA	NA	NA	te99655
Cluster_28780	scaffold_6	8117358	8118466	70.8702	15.2668	36.1692	2.42027	13.6551	110.11	NA	NA	NA	NA	te99827,te99828,te99829,te99830
Cluster_28834	scaffold_6	8327561	8328227	44.8014	1.45049	17.6012	8.04822	19.8659	67.3934	NA	NA	NA	NA	te99962,te99963,te99964,te99965
Cluster_28876	scaffold_6	8530507	8530734	114.905	12.73	102.982	0	13.8372	33.3767	NA	NA	NA	NA	te30085
Cluster_28886	scaffold_6	8564597	8565613	84.5264	7.61043	26.9354	1.31961	14.2699	54.989	NA	NA	NA	NA	te30092,te30093,te30094,te30095
Cluster_28901	scaffold_6	8600922	8601860	1700.61	1004.31	1634.72	0	2.0159	1.13082	NA	NA	NA	NA	te30115,te30116
Cluster_28902	scaffold_6	8601982	8603457	3652.25	1583.29	4258	2.72772	1.70997	1.67862	Carubv10003797m.g	AT5G24860	ATFPF1,FPF1	flowering promoting factor 1	te30117
Cluster_28949	scaffold_6	8783581	8784238	43.5478	2.57308	13.3815	2.03958	7.67147	88.2181	NA	NA	NA	NA	NA
Cluster_28964	scaffold_6	8816821	8817270	51.8509	2.68743	54.3518	0	12.6196	201.357	NA	NA	NA	NA	te30293,te30294
Cluster_28982	scaffold_6	8853890	8854472	195.196	94.5903	70.4802	0	3.24689	9.71384	NA	NA	NA	NA	te30326
Cluster_28983	scaffold_6	8855136	8855710	41.2909	29.0243	51.0435	0	0	0	NA	NA	NA	NA	te30327,te30328,te30329
Cluster_28999	scaffold_6	8918587	8919175	48.6493	40.2431	34.8811	0	1.07127	2.40372	NA	NA	NA	NA	NA
Cluster_29102	scaffold_6	9225073	9225432	62.5395	643.641	13.588	0	1.75272	26.5461	NA	NA	NA	NA	NA
Cluster_29103	scaffold_6	9225585	9228817	673.85	1606.45	180.052	1.66043	1.75651	2.51804	Carubv10002163m.g	AT3G05936	0	0	te30635,te30636
Cluster_29134	scaffold_6	9281095	9282688	110.427	3711.64	18.4128	51.3579	27.7092	1.66538	Carubv10001920m.g	AT5G26630	0	MADS-box transcription factor family protein	te30688
Cluster_29146	scaffold_6	9296891	9298167	53.5328	2349.18	11.4918	19.9677	15.8115	0.692929	Carubv10003757m.g	AT5G26630	0	MADS-box transcription factor family protein	te30709,te30710
Cluster_29147	scaffold_6	9298853	9299758	32.5311	465.051	11.8782	0	2.78578	7.03208	NA	NA	NA	NA	te30712
Cluster_29155	scaffold_6	9303168	9304233	276.1	4973.06	20.1907	45.3222	13.614	0.332034	Carubv10002555m.g	AT5G26630	0	MADS-box transcription factor family protein	te30720
Cluster_29180	scaffold_6	9354450	9355739	54.8972	3138.49	4.55039	1.04034	2.44565	1.78346	Carubv10003362m.g	AT5G26805	0	0	te30784,te30785,te30786
Cluster_29201	scaffold_6	9452769	9452866	630.732	2.46805	219.626	27.3886	19.3157	7.22343	NA	NA	NA	NA	NA
Cluster_29206	scaffold_6	9460031	9461131	110.424	2287.76	14.2174	7.31357	0.573095	2.41109	NA	NA	NA	NA	te30868
Cluster_29227	scaffold_6	9495482	9495928	86.0824	21.1027	91.9239	0	11.2927	141.342	NA	NA	NA	NA	te75883
Cluster_29250	scaffold_6	9552838	9553635	151.326	51.526	266.038	790.425	663.397	508.302	NA	NA	NA	NA	te75939
Cluster_29267	scaffold_6	9568992	9570300	48.7842	10.7169	30.643	1.02524	11.0867	232.27	NA	NA	NA	NA	te75958,te75959
Cluster_29300	scaffold_6	9656706	9657404	175.686	3.11419	155.358	0	0	10.3805	NA	NA	NA	NA	te76017
Cluster_29330	scaffold_6	9789081	9789766	411.14	199.56	353.683	1.95633	1.83959	1.2899	NA	NA	NA	NA	NA
Cluster_29331	scaffold_6	9789909	9790918	858.418	162.603	829.161	1.32875	4.99785	2.10266	NA	NA	NA	NA	te76141,te76142,te76143
Cluster_29384	scaffold_6	9873419	9875036	36.9376	8.67021	27.8142	184.137	238.274	11.8129	NA	NA	NA	NA	te76235,te76236,te76237,te76238,te76239,te76240,te76241
Cluster_29389	scaffold_6	9884705	9885059	69.1858	0	71.6525	0	30.2159	0.997037	Carubv10002372m.g	0	0	0	NA
Cluster_29470	scaffold_6	10003646	10005621	37.4961	0.979227	6.4364	0.67917	6.38642	4.38853	NA	NA	NA	NA	te76444,te76445
Cluster_29480	scaffold_6	10019977	10020638	137.893	98.2822	184.731	2.02725	3.81256	46.7832	NA	NA	NA	NA	te76462
Cluster_29522	scaffold_6	10063514	10064025	47.9706	2.362	0	0	3.69714	5.18479	NA	NA	NA	NA	te76542,te76543,te76544,te76545
Cluster_29523	scaffold_6	10064311	10064760	140.088	1.61246	4.34815	0	1.40217	5.50586	NA	NA	NA	NA	NA
Cluster_29529	scaffold_6	10066817	10067400	44.8602	0.828319	6.70091	0	11.8849	36.9706	NA	NA	NA	NA	te76549
Cluster_29552	scaffold_6	10092275	10092518	100.66	7.93013	44.1052	0	62.0634	4.35182	NA	NA	NA	NA	NA
Cluster_29564	scaffold_6	10098939	10099961	86.4315	5.91078	32.5155	52.4747	93.7524	1.21097	NA	NA	NA	NA	te76591
Cluster_29565	scaffold_6	10100134	10101925	40.6608	0.674858	3.82161	0.748907	4.57741	3.35777	NA	NA	NA	NA	te76592,te76593,te76594,te76595
Cluster_29575	scaffold_6	10108028	10108443	91.5132	12.7912	136.402	132.268	122.859	1.27626	NA	NA	NA	NA	NA
Cluster_29588	scaffold_6	10115407	10116694	71.1912	58.5894	167.107	126.077	107.286	1.37402	NA	NA	NA	NA	NA
Cluster_29589	scaffold_6	10116951	10117417	71.8772	0	2.09493	0	6.75565	1.8948	NA	NA	NA	NA	te76621,te76622
Cluster_29598	scaffold_6	10130628	10131050	121.934	10.8641	30.067	12.6907	53.7003	18.827	NA	NA	NA	NA	te76633,te76634
Cluster_29606	scaffold_6	10136955	10138358	79.0126	5.68496	20.9045	50.6611	35.5038	1.7647	NA	NA	NA	NA	te76644,te76645,te76646
Cluster_29623	scaffold_6	10154562	10155697	31.7102	0.851652	2.58363	7.08824	32.2154	23.8354	NA	NA	NA	NA	te76688,te76689,te76690
Cluster_29633	scaffold_6	10171269	10172326	37.5301	0.457219	0	1.26847	8.94581	0.334545	NA	NA	NA	NA	te76710,te76711,te76712
Cluster_29639	scaffold_6	10178198	10181093	543.632	100.389	312.485	982.433	1086.56	4.46102	NA	NA	NA	NA	te76722,te76723,te76724,te76725
Cluster_29654	scaffold_6	10196459	10198002	859.793	347.295	954.255	1293.37	1916.23	6.18951	NA	NA	NA	NA	te76759,te76760
Cluster_29686	scaffold_6	10243306	10243612	122.671	7.87847	25.494	0	49.3273	10.3763	NA	NA	NA	NA	te76829
Cluster_29772	scaffold_6	10354774	10358657	33.0936	0.685005	11.0831	0	21.7691	1.59477	NA	NA	NA	NA	te76975,te76974
Cluster_29773	scaffold_6	10358764	10360208	19.2635	0.50215	7.44752	0	11.3532	0.122473	NA	NA	NA	NA	te76975
Cluster_29775	scaffold_6	10360710	10361797	62.4559	1.33384	21.5809	0	55.6745	2.60256	NA	NA	NA	NA	te76975
Cluster_29776	scaffold_6	10361955	10363301	22.7923	0.179561	3.63153	0	17.8004	1.57661	NA	NA	NA	NA	te76975
Cluster_29801	scaffold_6	10378720	10382673	9.42104	2.44683	6.68057	11.5401	24.8944	1.87985	NA	NA	NA	NA	te76986,te76987,te76988,te76989
Cluster_29813	scaffold_6	10390723	10391641	37.416	1.05275	1.06456	0	4.80614	10.9766	NA	NA	NA	NA	te76995
Cluster_29940	scaffold_6	10558672	10560939	30.6832	2.34617	21.9995	0.591729	9.1809	68.043	NA	NA	NA	NA	te8076,te8077,te8078
Cluster_29986	scaffold_6	10613548	10614961	28.0813	0.513159	3.45945	0	4.01613	0.500634	NA	NA	NA	NA	te8150,te8151,te8152
Cluster_30014	scaffold_6	10647992	10649048	45.6984	0.457652	10.1813	2.53934	26.8628	25.7843	NA	NA	NA	NA	te8188,te8189,te8190,te8191
Cluster_30032	scaffold_6	10671686	10672818	35.7684	2.13477	7.7714	0	11.6951	1.0934	NA	NA	NA	NA	te8214
Cluster_30036	scaffold_6	10675429	10677507	1246.56	412.073	690.339	1061.88	1667.74	2.21324	NA	NA	NA	NA	te8214,te8215,te8216,te8217
Cluster_30063	scaffold_6	10696225	10697697	19.1752	1.14941	4.64924	0	9.42398	1.92233	NA	NA	NA	NA	te8235
Cluster_30065	scaffold_6	10699656	10700072	162.954	40.6015	86.8065	228.501	246.641	0	NA	NA	NA	NA	te8235
Cluster_30066	scaffold_6	10700151	10700622	555.05	165.004	460.148	631.214	1022.67	0.374945	NA	NA	NA	NA	te8235
Cluster_30067	scaffold_6	10700704	10701312	266.85	91.3463	173.497	213.757	346.054	0.290598	NA	NA	NA	NA	te8236,te8235
Cluster_30086	scaffold_6	10720770	10721992	54.5576	1.38437	3.99973	0	18.5734	0	NA	NA	NA	NA	te8264
Cluster_30092	scaffold_6	10724854	10725851	722.309	361.35	1181.25	103.544	135.3	9.57575	NA	NA	NA	NA	te8264,te8265,te8266,te8267,te8268
Cluster_30109	scaffold_6	10751946	10753520	21.3122	0.614271	5.59047	0.852089	15.2236	1.79783	NA	NA	NA	NA	te8309
Cluster_30111	scaffold_6	10754336	10756112	14.5127	0.952776	4.40442	0	12.4278	0.995915	Carubv10002430m.g	AT3G32960	0	Domain of unknown function (DUF1985)	NA
Cluster_30124	scaffold_6	10768859	10770190	17.5172	1.45267	6.61036	0	10.8953	1.86009	NA	NA	NA	NA	te8316
Cluster_30154	scaffold_6	10796504	10796627	2399.98	655.387	1088.79	324.687	1623.24	1785.44	NA	NA	NA	NA	NA
Cluster_30157	scaffold_6	10802308	10802493	314.715	84.5241	247.213	36.0764	196.757	164.605	NA	NA	NA	NA	NA
Cluster_30168	scaffold_6	10832796	10833459	46.8532	1.8213	1.47339	0	11.4032	21.3222	NA	NA	NA	NA	te8360,te8361
Cluster_30180	scaffold_6	10863277	10863981	39.4833	4.80307	24.9787	1.9036	38.4852	2.7613	NA	NA	NA	NA	te8374,te8373
Cluster_30188	scaffold_6	10868948	10869746	31.7643	1.51357	4.89779	1.67965	26.0604	1.32897	NA	NA	NA	NA	te8381
Cluster_30190	scaffold_6	10870345	10871520	20.189	2.05671	3.32766	0	19.8522	0.752441	NA	NA	NA	NA	te8382
Cluster_30195	scaffold_6	10876011	10876792	36.1191	3.71155	7.50639	3.43233	20.9788	9.27869	NA	NA	NA	NA	te8384,te8385
Cluster_30210	scaffold_6	10890432	10891848	35.8217	0.170691	2.07128	1.8942	7.56996	7.36872	NA	NA	NA	NA	te8394,te8395
Cluster_30215	scaffold_6	10895190	10895694	79.4381	0.957897	21.3102	0	13.7441	126.51	NA	NA	NA	NA	te8399
Cluster_30257	scaffold_6	10938833	10939034	405.296	32.329	62.962	126.232	321.736	100.753	NA	NA	NA	NA	te8452,te8453
Cluster_30270	scaffold_6	10957522	10958040	91.4923	13.0488	22.6204	0	29.1782	44.6698	NA	NA	NA	NA	te8474,te8475
Cluster_30289	scaffold_6	10980687	10981970	93.7295	3.9558	12.1911	2.09041	18.1824	2.06745	NA	NA	NA	NA	te8515,te8516
Cluster_30290	scaffold_6	10982056	10982890	79.9089	1.73798	5.85828	0	18.8916	3.39112	NA	NA	NA	NA	te8517
Cluster_30541	scaffold_6	11212812	11213643	36.9005	1.74425	3.52764	16.1303	40.1945	8.08295	NA	NA	NA	NA	te8763,te8764,te8765
Cluster_30572	scaffold_6	11238859	11240349	17.2965	0.486658	3.28079	11.7012	8.46382	12.3443	NA	NA	NA	NA	te8808
Cluster_30583	scaffold_6	11251548	11252161	94.0037	4.72708	50.988	10.9287	87.3504	20.4644	NA	NA	NA	NA	te8827,te8828,te8829
Cluster_30590	scaffold_6	11256735	11257584	32.748	0	6.90588	0	14.8465	9.99383	NA	NA	NA	NA	te8837
Cluster_30599	scaffold_6	11265802	11266473	34.1124	89.6211	18.9261	0	6.57269	13.9578	NA	NA	NA	NA	te8849
Cluster_30689	scaffold_6	11366942	11368050	28.791	3.48954	6.17523	1.21014	13.0861	15.1601	NA	NA	NA	NA	te8952
Cluster_30707	scaffold_6	11390014	11392511	46.2116	0.19365	3.52482	0	13.1349	1.9837	NA	NA	NA	NA	te8973,te8974,te8975,te8976
Cluster_30713	scaffold_6	11395293	11396177	25.9023	0.273298	3.31638	0	13.5464	1.19982	NA	NA	NA	NA	te8978
Cluster_30726	scaffold_6	11410606	11411949	82.5399	0.359924	3.63963	0	6.57269	6.05715	NA	NA	NA	NA	te9002,te9003,te9004
Cluster_30730	scaffold_6	11415803	11416556	104.238	4.49094	107.694	126.373	269.463	146.931	NA	NA	NA	NA	NA
Cluster_30740	scaffold_6	11428431	11428720	13030	4494.59	12718.3	33037.3	20624.3	32499.8	NA	NA	NA	NA	te9030
Cluster_30803	scaffold_6	11504029	11504138	260.495	2.19881	8.89394	0	74.5701	30.5683	Carubv10003928m.g	0	0	0	NA
Cluster_30904	scaffold_6	11627577	11629160	20.4158	0.30539	3.70581	0	5.57683	2.1228	NA	NA	NA	NA	te39720
Cluster_30962	scaffold_6	11724224	11725263	48.807	5.34903	21.6362	15.4851	26.0885	13.6134	NA	NA	NA	NA	te39842
Cluster_30964	scaffold_6	11735638	11736107	51.3864	7.71923	41.6312	14.277	29.5351	39.5368	NA	NA	NA	NA	te39843,te39844
Cluster_30967	scaffold_6	11736996	11737808	58.4066	5.65254	14.4403	9.90436	36.4772	27.4277	NA	NA	NA	NA	te39843,te39844
Cluster_30969	scaffold_6	11740214	11741265	49.0285	7.35723	20.4594	5.10282	21.5924	18.6731	NA	NA	NA	NA	te39845,te39846
Cluster_30974	scaffold_6	11744875	11745947	51.884	4.95911	19.1472	8.75516	21.7579	19.2973	NA	NA	NA	NA	te39846,te39847
Cluster_30978	scaffold_6	11755898	11757073	22.6256	0.411342	2.49575	0	12.8771	0.601953	NA	NA	NA	NA	te39863,te39864,te39865
Cluster_30995	scaffold_6	11785523	11785971	409.349	22.086	91.5144	59.7791	224.847	73.7064	NA	NA	NA	NA	te39918,te39919
Cluster_30998	scaffold_6	11796589	11799901	25.3295	0.949079	14.4698	0	26.4733	6.62384	NA	NA	NA	NA	te39929,te39930,te39931
Cluster_31028	scaffold_6	11820618	11821450	48.6502	0.290359	8.22128	0	7.57477	5.31135	NA	NA	NA	NA	te39967,te39968
Cluster_31032	scaffold_6	11822637	11823652	30.6206	0	0.962926	0	2.48417	0	NA	NA	NA	NA	te39972,te39973
Cluster_31061	scaffold_6	11857288	11858450	36.2536	2.49564	4.20607	1.15395	11.3934	10.1954	NA	NA	NA	NA	te40028
Cluster_31114	scaffold_6	11917400	11918714	18.9888	423.777	0.743979	0	3.83865	0.403743	NA	NA	NA	NA	te40091
Cluster_31206	scaffold_6	12064042	12064753	43.6946	1.35882	13.7406	1.88489	16.8379	13.6708	NA	NA	NA	NA	te40319,te40320,te40321
Cluster_31207	scaffold_6	12064832	12066165	58.3031	4.8954	17.6012	1.00603	43.5157	1.98996	NA	NA	NA	NA	te40322
Cluster_31209	scaffold_6	12067315	12067864	57.3089	2.63857	7.11515	0	19.503	1.28708	NA	NA	NA	NA	te40323,te40324
Cluster_31227	scaffold_6	12087376	12087839	92.6329	0	18.9763	8.67699	5.43947	65.2211	NA	NA	NA	NA	te40363
Cluster_31267	scaffold_6	12155211	12156001	30.533	5.80975	14.842	0	22.3355	15.6614	NA	NA	NA	NA	te40426
Cluster_31312	scaffold_6	12232037	12233211	27.1738	3.29354	2.49787	1.14216	6.44403	2.56048	NA	NA	NA	NA	te40536
Cluster_31339	scaffold_6	12287156	12288904	18.7238	162.352	2.79683	0.767319	1.44306	16.1897	NA	NA	NA	NA	te40608,te40609
Cluster_31380	scaffold_6	12339374	12339756	317.433	1405.11	321.854	0	3.29492	16.1726	NA	NA	NA	NA	te40680
Cluster_31383	scaffold_6	12345217	12345645	60.1142	2.25519	13.683	0	19.1205	191	NA	NA	NA	NA	te40683
Cluster_31388	scaffold_6	12353001	12353809	72.3572	1.49486	142.699	43.1311	109.973	156.192	Carubv10002683m.g	AT1G29962	AGL64	AGAMOUS-like 64	te40693
Cluster_31419	scaffold_6	12410277	12411433	293.656	632.163	250.291	1.15993	0	5.04766	NA	NA	NA	NA	te40762
Cluster_31476	scaffold_6	12515596	12516061	67.6393	2.59516	6.29828	0	13.5403	45.5727	NA	NA	NA	NA	te21407
Cluster_31508	scaffold_6	12581603	12582336	83.6545	2.63618	2.66576	0	1.71929	4.09886	NA	NA	NA	NA	te21492,te21493
Cluster_31512	scaffold_6	12588995	12590728	1347.03	179.937	798.915	832.777	2792.82	0.204122	NA	NA	NA	NA	te21507,te21508,te21509,te21510,te21511,te21512,te21513
Cluster_31513	scaffold_6	12590985	12591466	234.399	69.2488	377.531	108.588	627.051	0.367166	NA	NA	NA	NA	NA
Cluster_31537	scaffold_6	12636056	12636703	55.5907	13.8104	4.52932	0	5.84239	7.10081	NA	NA	NA	NA	te21583
Cluster_31538	scaffold_6	12637007	12637424	93.0339	41.083	4.68102	0	3.01903	4.65721	NA	NA	NA	NA	te21586
Cluster_31589	scaffold_6	12724330	12724839	1778.66	134.214	2098.62	2.63145	2.47442	5.89914	NA	NA	NA	NA	te21702
Cluster_31590	scaffold_6	12725161	12725503	445.153	527.458	385.058	0	0	2.06384	NA	NA	NA	NA	te21704
Cluster_31594	scaffold_6	12736622	12737515	91.577	37.3355	26.264	3.00233	33.1722	30.2875	Carubv10000057m.g	AT4G09680	ATCTC1,CTC1	conserved telomere maintenance component 1	te21711
Cluster_31595	scaffold_6	12738806	12739037	123.511	10.4254	54.8204	0	19.0381	86.1986	NA	NA	NA	NA	te21712
Cluster_31615	scaffold_6	12772952	12775196	21.3336	1262.24	1.74313	1.19558	0.562119	0.551812	Carubv10000498m.g	AT4G11550	0	Cysteine/Histidine-rich C1 domain family protein	te21739
Cluster_31617	scaffold_6	12775776	12776190	148.944	8496.89	23.5743	9.7015	3.04086	6.39665	Carubv10002827m.g	AT3G61500	0	0	te21742
Cluster_31628	scaffold_6	12788941	12789653	103.916	18.3183	28.8149	0	0.884962	1.24105	NA	NA	NA	NA	NA
Cluster_31630	scaffold_6	12798472	12799510	24.033	96.1424	33.898	2.58333	4.85835	50.2477	NA	NA	NA	NA	te21772,te21773
Cluster_31649	scaffold_6	12835908	12836112	117.813	790.499	4.77236	0	0	12.086	NA	NA	NA	NA	NA
Cluster_31669	scaffold_6	12878818	12879197	89.4105	6.36498	61.7894	0	28.228	49.8322	NA	NA	NA	NA	te21861
Cluster_31678	scaffold_6	12885944	12887257	291.591	244.262	84.1336	1.02134	1.44059	0.673417	Carubv10003255m.g	AT3G17500	0	F-box family protein	te21868,te21869
Cluster_31793	scaffold_6	13139165	13139578	69.2137	10.516	9.45249	0	12.1928	113.281	NA	NA	NA	NA	te22115
Cluster_31799	scaffold_6	13144103	13144811	58.8909	10.9165	6.89939	0	0.889955	8.23716	NA	NA	NA	NA	te22129,te22130,te22131
Cluster_31845	scaffold_6	13227560	13228491	462.934	42.3011	481.818	1.43996	2.03105	0.949432	NA	NA	NA	NA	NA
Cluster_31846	scaffold_6	13228686	13229032	180.491	25.7901	191.719	0	0	0	NA	NA	NA	NA	NA
Cluster_31896	scaffold_6	13375225	13376286	931.251	798.942	413.627	36.6471	367.774	3.49949	Carubv10003633m.g	AT4G00893	0	0	te22417,te22418
Cluster_31897	scaffold_6	13376782	13377430	1054.6	425.973	545.696	35.1536	336.392	7.36256	Carubv10003633m.g	AT4G00893	0	0	NA
Cluster_31898	scaffold_6	13377535	13378027	1972.85	704.021	2341.65	166.054	831.918	6.46153	NA	NA	NA	NA	NA
Cluster_31919	scaffold_6	13422933	13423701	852.235	2.83072	356.22	1.74518	4.10259	72.0324	NA	NA	NA	NA	te22446
Cluster_31935	scaffold_6	13443495	13445202	4534.48	811.564	2791.8	2131.71	3007.86	17.2001	Carubv10003338m.g	AT4G05475	0	RNI-like superfamily protein	NA
Cluster_32010	scaffold_6	13629926	13632099	649.611	808.27	456.315	0.617314	0.290238	0.16281	NA	NA	NA	NA	te87248,te87249,te87250
Cluster_32181	scaffold_6	14046460	14047011	809.058	335.637	951.748	2.43123	0	0.641211	NA	NA	NA	NA	NA
Cluster_32182	scaffold_6	14047485	14048136	579.493	546.06	685.733	0	0	0.814298	NA	NA	NA	NA	te87593
Cluster_32184	scaffold_6	14048561	14048801	422.938	233.84	446.542	0	0	28.639	NA	NA	NA	NA	te87596
Cluster_32187	scaffold_6	14051048	14051966	339.417	351.881	375.791	1.46033	0.686592	3.85145	NA	NA	NA	NA	NA
Cluster_32377	scaffold_6	14762774	14764029	1710.4	234.937	598.995	1392.26	1781.41	9.7223	NA	NA	NA	NA	NA
Cluster_32384	scaffold_6	14794286	14794609	75.8054	0.74651	3.01955	4.1421	9.73732	40.9662	NA	NA	NA	NA	te48007
Cluster_32385	scaffold_6	14794806	14795097	130.375	4.96991	26.8036	4.59603	19.448	73.9412	NA	NA	NA	NA	te48007
Cluster_32389	scaffold_6	14798350	14799585	4187.22	661.422	4868.71	3.25738	2.5525	54.2663	NA	NA	NA	NA	te48022,te48023
Cluster_32390	scaffold_6	14799735	14800618	235.7	386.334	282.211	0	0	0	NA	NA	NA	NA	te48024
Cluster_32549	scaffold_6	15349048	15349357	376.337	99.8685	640.65	2688.41	2739.67	9816.35	NA	NA	NA	NA	NA
Cluster_32568	scaffold_6	15434208	15434614	56.3233	12.4797	50.4791	6.59479	20.1541	34.3512	NA	NA	NA	NA	NA
Cluster_32719	scaffold_6	15934220	15934616	240.248	11.5756	202.074	3.38045	130.328	45.9152	NA	NA	NA	NA	NA
Cluster_32755	scaffold_6	16036329	16039411	2063.74	3345.76	703.206	6.96485	4.09327	0.287016	Carubv10001406m.g	AT4G01500	NGA4	AP2/B3-like transcriptional factor family protein	te61373,te61374
Cluster_32886	scaffold_7	41669	42007	777.643	241.156	505.039	83.1353	796.633	361.257	NA	NA	NA	NA	NA
Cluster_33113	scaffold_7	989769	990651	1280.43	399.646	1648.65	1.51986	1.42917	0	Carubv10005616m.g	AT4G37540	LBD39	LOB domain-containing protein 39	te64823,te64824
Cluster_33114	scaffold_7	990897	991418	2847.41	1925.69	4113.87	5.14192	0	1.01709	NA	NA	NA	NA	te64826
Cluster_33172	scaffold_7	1320722	1321352	41.5188	42.9308	49.6143	25.5222	47.9983	106.577	NA	NA	NA	NA	te65036,te65037
Cluster_33363	scaffold_7	2238204	2239018	33.652	0	31.2106	0	3.09683	0.217146	Carubv10005153m.g	AT4G34340	TAF8	TBP-associated factor 8	NA
Cluster_33365	scaffold_7	2239921	2240390	105.386	1.02923	77.0177	11.4216	8.05504	0	Carubv10005102m.g	AT4G34320	0	Protein of unknown function (DUF677)	NA
Cluster_33479	scaffold_7	2705551	2706301	44.1509	9.66188	24.7514	3.57401	21.0046	94.9675	NA	NA	NA	NA	te72416
Cluster_33498	scaffold_7	2814745	2815298	58.3729	37.9831	28.2551	19.3796	105.922	78.5842	NA	NA	NA	NA	te72464
Cluster_33525	scaffold_7	3041831	3042154	160.455	89.5811	256.661	4.1421	15.5797	76.4703	NA	NA	NA	NA	NA
Cluster_33534	scaffold_7	3099244	3099674	56.0362	8.41772	68.0974	0	14.6399	120.31	NA	NA	NA	NA	te72601
Cluster_33548	scaffold_7	3124645	3128050	1382.73	1975.22	585.104	4.72827	2.59357	0.207838	Carubv10007828m.g	AT4G32370	0	Pectin lyase-like superfamily protein	te72617,te72618,te72619,te72620,te72621,te72622,te72623,te72624
Cluster_33594	scaffold_7	3299006	3299428	54.1928	2.85897	16.1899	3.17267	43.2585	100.411	NA	NA	NA	NA	te72688
Cluster_33759	scaffold_7	4178050	4178442	243.735	5.53899	14.9364	0	0	72.5008	NA	NA	NA	NA	te27986
Cluster_33762	scaffold_7	4193664	4194669	2138.71	676.32	2182.29	2.66807	1.25443	0	Carubv10006313m.g	AT4G29658	PRA1.C	prenylated RAB acceptor 1.C	NA
Cluster_33763	scaffold_7	4194877	4195936	4954.67	2240.26	5318.99	6.33038	3.57157	2.00348	NA	NA	NA	NA	NA
Cluster_33849	scaffold_7	4549391	4550632	41.8578	1637.39	0.787708	2.1611	0.508034	0	NA	NA	NA	NA	te84210,te84211
Cluster_33869	scaffold_7	4658856	4659941	36.5625	301.334	7.20687	1.23576	0.581011	0	Carubv10005139m.g	AT4G28530	anac074,NAC074	NAC domain containing protein 74	NA
Cluster_34015	scaffold_7	5325945	5327278	19.9458	3.2636	15.401	0	5.20297	118.602	NA	NA	NA	NA	te84549
Cluster_34030	scaffold_7	5419908	5421149	479.222	1108.27	236.312	6.48329	0.508034	0.142491	NA	NA	NA	NA	te84587
Cluster_34031	scaffold_7	5421280	5422698	68.0807	361.866	1.3789	0.945765	0	0	Carubv10007490m.g	AT4G13060	0	F-box associated ubiquitination effector family protein	NA
Cluster_34045	scaffold_7	5485418	5485775	75.4666	95.2613	122.975	0	1.76251	1.48302	Carubv10007474m.g	AT4G26260	MIOX4	myo-inositol oxygenase 4	te84614
Cluster_34065	scaffold_7	5569367	5569759	165.615	116.319	117.002	54.6378	276.153	270.189	Carubv10005024m.g	AT4G26050	PIRL8	plant intracellular ras group-related LRR 8	NA
Cluster_34072	scaffold_7	5668689	5668817	241.167	13.1247	212.351	0	0	0	NA	NA	NA	NA	NA
Cluster_34073	scaffold_7	5668913	5669489	126.991	6.28776	137.34	0	0	6.441	NA	NA	NA	NA	te95740
Cluster_34074	scaffold_7	5669571	5670238	155.651	1.44832	209.434	0	0.944578	5.29863	NA	NA	NA	NA	te95740
Cluster_34108	scaffold_7	5811908	5812531	41.9846	6.20177	14.1106	0	1.01118	52.1847	NA	NA	NA	NA	te95802,te95803
Cluster_34160	scaffold_7	6092234	6093531	17.6607	7.26725	14.3207	0	6.3195	107.166	Carubv10004822m.g	AT4G24670	TAR2	tryptophan aminotransferase related 2	te95908,te95909
Cluster_34163	scaffold_7	6098961	6100633	446.541	6345.27	16.3738	4.01088	1.88577	0.211565	Carubv10007003m.g	AT4G24650	ATIPT4,IPT4	isopentenyltransferase 4	te95911,te95912,te95913
Cluster_34164	scaffold_7	6100714	6101812	39.8548	419.034	2.67061	0	0	0	Carubv10006698m.g	AT4G24640	APPB1	Plant invertase/pectin methylesterase inhibitor superfamily protein	te95914
Cluster_34178	scaffold_7	6199445	6199805	111.125	27.4699	121.953	63.1986	176.534	859.869	NA	NA	NA	NA	NA
Cluster_34179	scaffold_7	6201782	6202237	217.242	147.986	188.801	64.7476	303.036	303.495	NA	NA	NA	NA	NA
Cluster_34198	scaffold_7	6259337	6261983	65.4155	0.0913748	10.3488	2.02802	1.43025	22.5313	NA	NA	NA	NA	te95963
Cluster_34203	scaffold_7	6274365	6275329	24.1792	4.76219	16.2211	1.39072	4.57704	79.4091	Carubv10005016m.g	AT4G24220	AWI31,VEP1	NAD(P)-binding Rossmann-fold superfamily protein	te95974
Cluster_34235	scaffold_7	6419745	6421162	962.462	492.949	952.115	0	2.66987	9.1108	NA	NA	NA	NA	te96052,te96053
Cluster_34311	scaffold_7	6816850	6818009	514.863	1945.8	71.6882	1.15693	0.543947	0	NA	NA	NA	NA	te32789,te32790
Cluster_34361	scaffold_7	7092697	7093391	372.832	133.985	1889.1	1388.38	2866.18	3.56495	NA	NA	NA	NA	NA
Cluster_34557	scaffold_7	7972276	7973850	34.5673	0.767838	6.8328	0	14.0217	0.449458	NA	NA	NA	NA	te25907,te25908,te25909
Cluster_34588	scaffold_7	8024271	8025708	20.2113	4.87775	23.812	1.86654	49.5831	11.8147	NA	NA	NA	NA	te25944,te25945
Cluster_34657	scaffold_7	8453656	8454229	95.5624	33.71	0	4.6761	1.09927	0	NA	NA	NA	NA	NA
Cluster_34658	scaffold_7	8454471	8455241	146.007	19.7636	19.0337	0	1.63678	0.459077	NA	NA	NA	NA	NA
Cluster_34737	scaffold_7	8857300	8857863	571.928	807.088	574.163	0	1.11876	0	NA	NA	NA	NA	NA
Cluster_34872	scaffold_7	9497695	9498191	49.4184	0.486658	35.4326	2.70028	3.80872	98.6355	NA	NA	NA	NA	te34171
Cluster_34926	scaffold_7	9644809	9645743	423.359	126.496	630.946	0	2.02453	1.51422	NA	NA	NA	NA	NA
Cluster_34943	scaffold_7	9737719	9738014	77.4445	1.63425	16.5259	0	0	0	NA	NA	NA	NA	NA
Cluster_34998	scaffold_7	9953059	9953604	56.979	3.98685	17.9182	0	19.6458	54.4536	NA	NA	NA	NA	te34404
Cluster_35059	scaffold_7	10076136	10076901	86.5726	0.631512	14.0492	1.75201	12.356	80.8628	Carubv10004558m.g	AT4G20240	CYP71A27	cytochrome P450, family 71, subfamily A, polypeptide 27	te34514,te34515,te34516
Cluster_35129	scaffold_7	10296049	10296242	236.325	0	0	0	3.25246	0	NA	NA	NA	NA	NA
Cluster_35194	scaffold_7	10503431	10504029	44.4202	2.82652	29.399	0	35.8151	85.3848	NA	NA	NA	NA	NA
Cluster_35206	scaffold_7	10519241	10519785	65.3457	3.99417	91.5504	22.1621	31.2595	383.173	NA	NA	NA	NA	NA
Cluster_35261	scaffold_7	10662599	10663078	58.844	3.02336	16.3055	0	14.4599	12.167	Carubv10005117m.g	AT4G14365	XBAT34	XB3 ortholog 4 in Arabidopsis thaliana	te714
Cluster_35272	scaffold_7	10684480	10684905	315.18	2868.93	89.5657	6.30066	5.92468	22.4333	NA	NA	NA	NA	te734
Cluster_35328	scaffold_7	10850698	10851153	59.2479	4.24332	53.6367	0	0	0	Carubv10007134m.g	AT4G14090	0	UDP-Glycosyltransferase superfamily protein	NA
Cluster_35331	scaffold_7	10852551	10852724	324.656	84.7932	269.885	0	0	62.0426	NA	NA	NA	NA	NA
Cluster_35383	scaffold_7	11026842	11027341	46.6658	6.77233	31.3067	123.468	70.6695	82.4699	NA	NA	NA	NA	te942
Cluster_35394	scaffold_7	11058084	11058432	687.332	344.438	756.876	0	1.80796	0	NA	NA	NA	NA	NA
Cluster_35432	scaffold_7	11126400	11126608	246.785	42.8189	613.213	654.967	2285.41	86.3701	NA	NA	NA	NA	NA
Cluster_35435	scaffold_7	11127510	11127975	83.4511	35.2942	146.96	74.8778	358.818	3.41795	NA	NA	NA	NA	te1058
Cluster_35512	scaffold_7	11249486	11250076	44.3289	4.09254	21.52	2.2708	26.6911	127.565	Carubv10007802m.g	AT4G05460	0	RNI-like superfamily protein	NA
Cluster_35564	scaffold_7	11327743	11328431	218.042	136.907	533.894	467.474	1013.78	31.3365	NA	NA	NA	NA	NA
Cluster_35620	scaffold_7	11430543	11430950	1072.54	262.025	961.548	0	6.18606	1.73504	NA	NA	NA	NA	NA
Cluster_35628	scaffold_7	11440376	11440700	128.473	0.744213	102.349	0	0	3.26721	NA	NA	NA	NA	te1436
Cluster_35629	scaffold_7	11440969	11441211	421.141	99.5346	398.58	0	5.19324	4.36973	NA	NA	NA	NA	NA
Cluster_35640	scaffold_7	11464194	11465207	31.8921	3.33942	16.402	0	7.4672	108.907	NA	NA	NA	NA	te1460,te1461
Cluster_35645	scaffold_7	11469040	11469447	69.2282	2.37127	55.1511	3.28931	17.0117	390.818	NA	NA	NA	NA	te1463
Cluster_35660	scaffold_7	11486718	11487265	100.843	0.441367	92.8345	2.44898	2.30284	402.39	NA	NA	NA	NA	NA
Cluster_35678	scaffold_7	11523539	11524450	34.1124	0.530415	6.4364	2.94307	12.4535	67.1415	NA	NA	NA	NA	te50835,te50836
Cluster_35770	scaffold_7	11662604	11663546	154.971	283.933	87.1474	0	0.669118	0.375343	NA	NA	NA	NA	te51006,te51007,te51008,te51009
Cluster_35775	scaffold_7	11671591	11672287	1016.03	3837.98	1134.14	1.92545	1.81055	0	NA	NA	NA	NA	te51033
Cluster_35805	scaffold_7	11750113	11750594	122.295	327.176	18.2676	2.78432	6.54542	24.6001	NA	NA	NA	NA	te51164
Cluster_35831	scaffold_7	11857178	11858218	50.3331	2814.14	2.8194	6.44592	0.606127	0.170004	NA	NA	NA	NA	NA
Cluster_35954	scaffold_7	12033413	12035228	19.1601	2.66376	5.92603	0	24.3218	1.75415	NA	NA	NA	NA	te51502,te51503
Cluster_35955	scaffold_7	12035408	12036469	30.4507	0.683246	2.76365	0	11.8828	1.1665	NA	NA	NA	NA	te51504
Cluster_36115	scaffold_7	12221825	12222341	70.4683	325.611	70.0161	2.59582	0	0.34231	NA	NA	NA	NA	NA
Cluster_36180	scaffold_7	12303542	12306863	313.851	485.704	102.781	2.42391	5.50824	0.7991	Carubv10006743m.g	AT5G48050	0	0	te51892,te51893,te51894
Cluster_36183	scaffold_7	12309784	12310173	60.8776	13.0237	10.0342	0	8.08946	178.789	NA	NA	NA	NA	te51900
Cluster_36186	scaffold_7	12311872	12312354	68.6487	243.872	12.1532	2.77855	2.61275	4.03047	NA	NA	NA	NA	te51900
Cluster_36199	scaffold_7	12325984	12326384	66.3534	3.61899	17.0781	3.34673	36.1908	9.26797	NA	NA	NA	NA	te51911
Cluster_36254	scaffold_7	12386062	12386673	128.423	17.3893	28.7745	37.2789	43.3024	66.5099	NA	NA	NA	NA	NA
Cluster_36272	scaffold_7	12408808	12409138	84.0959	16.8066	41.3796	0	28.5942	7.48531	NA	NA	NA	NA	te51999,te52000,te52001
Cluster_36286	scaffold_7	12431685	12432077	79.1617	4.3081	14.9364	6.82972	32.1108	14.8604	NA	NA	NA	NA	NA
Cluster_36287	scaffold_7	12432208	12433756	169.659	5.46509	22.7372	0	33.4023	7.31204	NA	NA	NA	NA	te52022
Cluster_36288	scaffold_7	12433873	12434244	147.454	4.5513	7.88978	0	18.658	8.08753	NA	NA	NA	NA	NA
Cluster_36289	scaffold_7	12434331	12435665	96.2814	1.4494	7.32834	0	17.0151	3.31412	NA	NA	NA	NA	te52023,te52024
Cluster_36321	scaffold_7	12472817	12473807	67.743	5.12538	6.91052	0	12.7342	5.35744	NA	NA	NA	NA	te52075,te52076
Cluster_36322	scaffold_7	12473896	12475042	49.6073	3.16307	5.97065	0	15.9532	17.898	NA	NA	NA	NA	te52077,te52078,te52079,te15611
Cluster_36446	scaffold_7	12614085	12614398	83.4343	18.4868	121.513	51.2882	225.062	34.9439	NA	NA	NA	NA	te15768
Cluster_36476	scaffold_7	12652276	12653241	30.5105	83.6276	80.0086	27.7855	57.4804	9.52656	NA	NA	NA	NA	te15802,te15803
Cluster_36538	scaffold_7	12753195	12753705	52.0699	6.62655	40.2055	10.5052	60.5048	30.8233	NA	NA	NA	NA	te15885,te15886
Cluster_36586	scaffold_7	12844716	12845363	279.848	6.34533	19.627	0	29.212	32.773	NA	NA	NA	NA	te15993,te15994
Cluster_36596	scaffold_7	12852615	12853070	59.2479	1.06083	0	0	8.30234	8.53822	NA	NA	NA	NA	te15999
Cluster_36600	scaffold_7	12854962	12855139	280.565	4.07645	38.4738	0	35.4482	18.8905	NA	NA	NA	NA	te15999
Cluster_36612	scaffold_7	12863555	12864006	147.619	3.21065	4.32891	2.96912	13.9597	62.2542	NA	NA	NA	NA	te16005
Cluster_36613	scaffold_7	12864098	12864739	52.2845	2.26046	6.09553	0	5.89699	7.99416	NA	NA	NA	NA	te16006,te16007
Cluster_36616	scaffold_7	12865740	12866517	72.6095	1.86531	3.77249	0	2.43308	3.4121	NA	NA	NA	NA	te16007
Cluster_36618	scaffold_7	12867227	12868485	100.468	3.65013	13.2102	2.13191	16.0376	10.9642	NA	NA	NA	NA	te16007,te16008,te16009
Cluster_36621	scaffold_7	12869792	12870450	48.4511	6.97346	28.2069	22.4013	20.107	32.763	NA	NA	NA	NA	te16010
Cluster_36622	scaffold_7	12870575	12871083	57.0998	2.37592	17.2986	31.6395	47.1064	22.9475	NA	NA	NA	NA	te16010
Cluster_36626	scaffold_7	12873203	12873971	43.1174	5.66144	15.2666	12.2162	28.7181	29.2272	NA	NA	NA	NA	te16012,te16013
Cluster_36629	scaffold_7	12885154	12885857	35.4692	2.40495	5.55871	1.90631	11.6516	17.0941	NA	NA	NA	NA	te16014,te16015
Cluster_36634	scaffold_7	12887862	12888458	44.569	0.810282	9.83249	6.74392	13.7399	25.4938	NA	NA	NA	NA	te16016
Cluster_36637	scaffold_7	12889615	12890812	47.4955	4.84546	10.6163	7.84164	31.0749	15.0679	NA	NA	NA	NA	te16016
Cluster_36638	scaffold_7	12891050	12891590	68.8554	4.47078	14.467	7.442	31.4906	35.9836	NA	NA	NA	NA	te16016,te16017
Cluster_36713	scaffold_7	12981732	12982306	172.995	1.26193	13.6116	0	14.2656	2.46225	NA	NA	NA	NA	te16106,te16107,te16108
Cluster_36853	scaffold_7	13190483	13190856	182.784	3.23354	0	0	21.9324	35.4895	NA	NA	NA	NA	te16367
Cluster_36877	scaffold_7	13231379	13232579	28.2898	0.805559	1.6292	0	7.88066	1.17885	NA	NA	NA	NA	te16423
Cluster_36909	scaffold_7	13280932	13282561	25.1135	66.4769	6.60225	0	6.19365	0	NA	NA	NA	NA	te16468,te16469,te16470,te16471,te16472
Cluster_36914	scaffold_7	13290933	13292196	28.1752	1.33946	6.19198	0	7.98706	0.420033	NA	NA	NA	NA	te16479,te16480,te16481,te16482,te16483
Cluster_36915	scaffold_7	13292332	13292820	56.9238	1.48386	12.0041	0	14.1938	2.53337	NA	NA	NA	NA	te16483,te16484,te16485
Cluster_37001	scaffold_7	13379473	13380060	40.378	1.23403	3.32766	0	4.29237	0.300976	NA	NA	NA	NA	te16615,te16616
Cluster_37125	scaffold_7	13526240	13527391	111.931	5.45885	17.8342	1.16497	23.0044	9.37102	Carubv10007859m.g	AT1G11580	ATPMEPCRA,PMEPCRA	methylesterase PCR A	NA
Cluster_37209	scaffold_7	13637045	13639211	20.7792	0.223229	4.06322	0.619308	11.0647	7.75844	NA	NA	NA	NA	te68060,te68061
Cluster_37241	scaffold_7	13663685	13666754	32.2679	5.75128	15.6151	161.307	192.171	9.97281	NA	NA	NA	NA	te68083,te68084,te68085,te68087,te68088,te68089,te68090,te68091,te68092,te68093,te68094,te68086
Cluster_37253	scaffold_7	13673439	13676548	46.7264	0.777714	5.3478	0	32.259	6.25953	NA	NA	NA	NA	te68109,te68110
Cluster_37255	scaffold_7	13676886	13677908	28.4104	0	1.91267	0	9.25188	3.11391	NA	NA	NA	NA	te68112
Cluster_37323	scaffold_7	13771214	13771695	84.9273	6.02164	28.4163	2.78432	22.2544	21.6628	NA	NA	NA	NA	NA
Cluster_37324	scaffold_7	13771834	13772293	80.98	13.1451	14.8877	0	10.9735	1.53891	NA	NA	NA	NA	NA
Cluster_37325	scaffold_7	13772390	13773459	113.623	16.2753	22.8582	0	33.0232	3.14253	NA	NA	NA	NA	NA
Cluster_37326	scaffold_7	13773559	13774498	26.1287	1.28654	6.24468	2.85541	8.72629	3.57714	NA	NA	NA	NA	te68224
Cluster_37330	scaffold_7	13778382	13778660	327.186	1267.43	98.1839	9.62036	47.493	778.305	NA	NA	NA	NA	te68234
Cluster_37341	scaffold_7	13790303	13792008	310.491	101.937	494.901	4069.39	4955.36	13.0708	NA	NA	NA	NA	te68253,te68254,te68255,te68256,te68257,te68258
Cluster_37360	scaffold_7	13812463	13813371	40.0793	0	2.15255	0	4.85902	1.55753	NA	NA	NA	NA	te68296
Cluster_37376	scaffold_7	13823606	13825511	15.4634	0.507595	3.59304	0	12.2488	30.8266	NA	NA	NA	NA	te68309,te68310,te68311
Cluster_37396	scaffold_7	13852226	13853090	27.9209	6.71082	20.3584	6.20597	70.7571	4.09189	NA	NA	NA	NA	te68342,te68343,te68344,te68345
Cluster_37501	scaffold_7	13987277	13988749	47.2433	0.98521	5.31342	0	8.56725	0.961163	NA	NA	NA	NA	te68485,te68486
Cluster_37510	scaffold_7	13994943	13996851	452.236	57.5215	609.344	194.03	521.904	2.31763	NA	NA	NA	NA	te68503,te68504,te68505,te68506,te68507
Cluster_37513	scaffold_7	13999678	14000343	34.4198	0	4.4069	0	8.52673	0.531454	NA	NA	NA	NA	te68508,te68509
Cluster_37515	scaffold_7	14000746	14001258	61.4423	2.3574	7.62833	0	40.5892	10.3494	NA	NA	NA	NA	te68511
Cluster_37530	scaffold_7	14014844	14015214	98.1997	28.6853	60.6514	3.61736	64.6285	21.9429	NA	NA	NA	NA	te68529,te68530
Cluster_37535	scaffold_7	14017495	14020084	1076.64	658.65	1070.12	3233.85	4527.69	2.32321	NA	NA	NA	NA	te68533,te68534,te68535,te68536,te68537,te68538,te68539,te68540
Cluster_37543	scaffold_7	14030812	14031772	346.733	194.301	418.413	1027.83	1402.47	1.28909	NA	NA	NA	NA	te68562,te68563,te68564,te68565,te68566
Cluster_37544	scaffold_7	14032082	14032696	1214.74	350.415	663.357	2526.96	4176.77	0.863288	NA	NA	NA	NA	te68567
Cluster_37565	scaffold_7	14066704	14067133	147.556	1.12497	27.3023	0	30.8152	88.8986	NA	NA	NA	NA	te68632
Cluster_37603	scaffold_7	14134304	14134788	57.3933	14.4623	66.567	0	26.0197	0	Carubv10006281m.g	AT2G04378	0	Beta-galactosidase related protein	te68697
Cluster_37604	scaffold_7	14134886	14135585	60.8176	26.6056	82.4595	0	100.055	0	Carubv10006281m.g	AT2G04378	0	Beta-galactosidase related protein	te68698,te68699
Cluster_37606	scaffold_7	14138722	14140607	39.5024	21.2886	82.4788	4.26948	108.732	0	Carubv10007225m.g	AT5G35330	ATMBD2,MBD02,MBD2	methyl-CPG-binding domain protein 02	NA
Cluster_37609	scaffold_7	14145923	14146758	122.413	63.3604	173.198	0	232.466	0	NA	NA	NA	NA	te68712
Cluster_37634	scaffold_7	14192537	14192862	74.0847	0	39.0133	8.23338	69.6786	504.865	NA	NA	NA	NA	te68746
Cluster_37700	scaffold_7	14292748	14294049	33.012	0.928837	3.00563	0	10.1771	5.70884	NA	NA	NA	NA	te68879
Cluster_37759	scaffold_7	14412800	14413089	398.057	0.834031	445.31	0	0	1.22051	Carubv10007042m.g	AT3G42473	LCR47	low-molecular-weight cysteine-rich 47	NA
Cluster_37760	scaffold_7	14413168	14413967	329.015	2.11635	551.535	0	0.788723	19.9096	NA	NA	NA	NA	NA
Cluster_37766	scaffold_7	14421790	14422939	114.974	31.1275	158.235	0	6.58412	1.23112	NA	NA	NA	NA	te69030,te69031,te69032
Cluster_37767	scaffold_7	14423052	14424157	353.462	42.8629	415.747	6.06709	5.70505	4.32034	NA	NA	NA	NA	te69033
Cluster_37768	scaffold_7	14424389	14425298	236.613	49.7028	299.95	0	4.1603	2.5282	NA	NA	NA	NA	NA
Cluster_37811	scaffold_7	14504040	14505901	45.068	0.259795	4.72878	0	11.8605	20.4347	NA	NA	NA	NA	te26787,te26788,te26789,te26790,te26791,te26792
Cluster_37897	scaffold_7	14730908	14732482	28.3296	4.45346	6.21164	0	8.01242	9.66335	NA	NA	NA	NA	te27041,te27042,te27043
Cluster_37898	scaffold_7	14732865	14734739	206.312	124.74	28.176	0	14.4704	11.7039	NA	NA	NA	NA	te27046,te27047,te27048,te27049
Cluster_37899	scaffold_7	14734820	14736403	40.5731	18.1707	12.3527	1.6945	13.9421	40.6683	NA	NA	NA	NA	te27050,te27051,te27052
Cluster_37932	scaffold_7	14836737	14837782	102.924	1500.7	27.124	1.28302	0.60323	2.36868	Carubv10004834m.g	AT5G37540	0	Eukaryotic aspartyl protease family protein	NA
Cluster_37933	scaffold_7	14838081	14840788	369.594	601.547	384.397	0.495584	0.932021	3.52903	NA	NA	NA	NA	te27134,te27135,te27136,te27137,te27138,te27139
Cluster_37935	scaffold_7	14841656	14841989	326.009	159.315	410.08	0	0	0	NA	NA	NA	NA	NA
Cluster_37936	scaffold_7	14842508	14842909	60.0786	41.5148	75.4436	0	1.5696	0	NA	NA	NA	NA	NA
Cluster_37938	scaffold_7	14843286	14843555	1355.4	160.35	1670.41	0	0	2.62184	NA	NA	NA	NA	NA
Cluster_37939	scaffold_7	14843630	14844337	1057.49	149.631	1521.39	0	0.891212	3.49949	NA	NA	NA	NA	NA
Cluster_37965	scaffold_7	14894537	14895278	54.065	0.651938	10.5481	0	4.25187	30.2907	NA	NA	NA	NA	te27199,te27200,te27201,te27202,te27203
Cluster_37980	scaffold_7	14914345	14915004	71.9463	21.6216	35.5757	0	42.0652	2.41328	NA	NA	NA	NA	te27225,te27226
Cluster_37997	scaffold_7	14939657	14940188	173.127	120.025	183.897	0	0	0.665316	NA	NA	NA	NA	te27250,te27251
Cluster_37998	scaffold_7	14940364	14940749	502.673	439.876	496.77	0	1.63466	2.29241	NA	NA	NA	NA	te27252
Cluster_37999	scaffold_7	14940824	14941951	122.66	185.69	156.984	0	3.35627	60.8741	NA	NA	NA	NA	te27253,te27254,te27255
Cluster_38006	scaffold_7	14945558	14946326	67.6039	1.2581	1.27221	0	4.92311	10.5862	NA	NA	NA	NA	te27262,te27263
Cluster_38033	scaffold_7	15002569	15003087	48.9011	0.932058	11.3102	0	0	30.6892	NA	NA	NA	NA	NA
Cluster_38034	scaffold_7	15003535	15004101	97.4641	2.55946	6.90182	0	2.22567	14.6698	NA	NA	NA	NA	te27335,te27336,te27337
Cluster_38045	scaffold_7	15009973	15010553	102.161	31.2223	1.68388	0	1.08602	0	NA	NA	NA	NA	te27352,te27353
Cluster_38057	scaffold_7	15044765	15045991	763.318	41.5928	924.911	0	3.08547	13.4137	NA	NA	NA	NA	te27395,te27396,te27397
Cluster_38099	scaffold_7	15160693	15162526	47.0953	5.27523	10.1354	0.731756	9.63325	52.5905	NA	NA	NA	NA	te27471,te27472,te27473,te27474,te27475,te27476,te27477,te27478
Cluster_38275	scaffold_7	15673925	15676140	1095.05	1459.18	622.495	0	1.42369	0.479172	Carubv10004080m.g	AT5G41150	ATRAD1,RAD1,UVH1	Restriction endonuclease, type II-like superfamily protein	te82732,te82733,te82734,te82735
Cluster_38300	scaffold_7	15783824	15785501	8096.48	900.307	8388.13	17287.4	12302.2	3510.06	NA	NA	NA	NA	te82800
Cluster_38353	scaffold_7	15917419	15919197	2062.62	2140.25	1881.87	1.50876	3.19213	10.1469	NA	NA	NA	NA	te82904
Cluster_38356	scaffold_7	15920262	15921530	141.611	803.371	37.7764	2.11512	7.45837	59.4097	NA	NA	NA	NA	te82906
Cluster_38470	scaffold_7	16255235	16257167	189.321	16.7669	92.1141	531.123	1185.25	21.3321	NA	NA	NA	NA	te83186,te83187,te83188,te83189
Cluster_38487	scaffold_7	16296598	16296776	317.875	1.35122	27.3277	0	3.52502	0	NA	NA	NA	NA	te83254,te83255
Cluster_38500	scaffold_7	16327901	16328244	197.535	161.012	736.594	195.064	511.753	0	NA	NA	NA	NA	NA
Cluster_38530	scaffold_7	16439801	16441404	107.186	403.366	53.6741	0	0	4.85465	NA	NA	NA	NA	te83366,te83367,te83368,te83369
Cluster_38531	scaffold_7	16441491	16442412	190.467	481.64	109.293	0	0	0	NA	NA	NA	NA	NA
Cluster_38548	scaffold_7	16461751	16462626	31.3087	4.96991	11.1682	0	2.16088	95.1539	NA	NA	NA	NA	NA
Cluster_38732	scaffold_7	16817360	16817597	116.957	74.1867	65.7703	28.1941	161.721	127.897	NA	NA	NA	NA	NA
Cluster_38764	scaffold_7	16913687	16914209	352.995	178.049	89.7896	0	0	0	Carubv10004731m.g	AT5G38970	ATBR6OX,BR6OX,BR6OX1,CYP85A1	brassinosteroid-6-oxidase 1	NA
Cluster_38765	scaffold_7	16914332	16915419	213.704	44.2389	41.3633	0	0.579943	0	Carubv10007047m.g	AT5G38960	0	RmlC-like cupins superfamily protein	NA
Cluster_38864	scaffold_7	17266876	17267120	437.753	6.91055	702.802	0	41.2067	1007.67	NA	NA	NA	NA	te29585
Cluster_38867	scaffold_7	17270611	17270893	167.79	5.12797	13.828	0	0	28.7661	NA	NA	NA	NA	te29587
Cluster_38984	scaffold_8	397610	398790	23.9163	4.91521	6.62715	0	6.41129	72.2282	NA	NA	NA	NA	te41095
Cluster_38999	scaffold_8	435494	436989	178.133	11770.9	15.6952	13.4563	6.74843	10.1736	Carubv10026508m.g	AT5G46750	AGD9	ARF-GAP domain 9	te41129
Cluster_39007	scaffold_8	470818	471993	417.355	131.424	440.083	0	1.60964	3.16025	NA	NA	NA	NA	te41157
Cluster_39014	scaffold_8	491135	492373	39.316	2.9282	7.10653	1.08316	5.6019	40.137	NA	NA	NA	NA	te41168,te41169,te41167
Cluster_39056	scaffold_8	671265	671872	100.318	32.2227	112.637	0	1.03779	0	Carubv10027734m.g	AT5G25410	0	Protein of Unknown Function (DUF239)	te41282
Cluster_39057	scaffold_8	672012	672424	94.1603	53.8788	135.024	0	1.52779	5.1421	NA	NA	NA	NA	te41283,te41284
Cluster_39059	scaffold_8	672771	673246	850.518	132.621	733.75	0	0	1.48718	NA	NA	NA	NA	NA
Cluster_39161	scaffold_8	1045594	1045810	616.854	0	761.927	0	29.0773	0	NA	NA	NA	NA	NA
Cluster_39191	scaffold_8	1210213	1210811	304.108	3357.9	34.2988	11.2023	6.32032	0.295449	Carubv10027589m.g	AT5G45180	0	Flavin-binding monooxygenase family protein	NA
Cluster_39192	scaffold_8	1210964	1212706	821.517	2981.94	376.066	9.23952	2.53405	1.72608	Carubv10027589m.g	AT5G45180	0	Flavin-binding monooxygenase family protein	te3591,te3592
Cluster_39193	scaffold_8	1213021	1215119	100.436	1418.72	19.576	4.4756	0.901827	0.252941	Carubv10027713m.g	AT5G45160	0	Root hair defective 3 GTP-binding protein (RHD3)	te3594
Cluster_39213	scaffold_8	1307386	1308730	37.7393	3.77639	15.2751	41.9076	25.8021	39.7369	NA	NA	NA	NA	te3673,te3674,te3675
Cluster_39242	scaffold_8	1419108	1419883	232.633	268.986	50.4295	989.236	1248.95	255.198	NA	NA	NA	NA	te3768,te3769,te3770
Cluster_39277	scaffold_8	1544583	1545581	22.5368	0.242111	3.91725	0	4.42127	7.6175	NA	NA	NA	NA	te3873,te3874
Cluster_39334	scaffold_8	1747555	1751202	37.4788	5.10524	16.6274	0.367884	60.192	11.9826	Carubv10028325m.g	AT3G58130	0	N-acetylglucosaminylphosphatidylinositol de-N-acetylase family protein	te4105,te4106
Cluster_39351	scaffold_8	1803376	1805234	3337.55	377.05	1591.96	4253.52	3895.16	0.380794	NA	NA	NA	NA	te4142,te4143,te4144,te4145
Cluster_39355	scaffold_8	1810737	1811547	28.7705	8.3506	6.03165	0	11.6704	12.2202	NA	NA	NA	NA	te4154,te4155
Cluster_39358	scaffold_8	1813026	1814132	9778.16	2244.55	6812.98	12608.1	15545.9	26.2184	NA	NA	NA	NA	te4157,te4158,te4159
Cluster_39359	scaffold_8	1816715	1817057	341.323	42.3095	96.9776	156.506	110.375	25.798	NA	NA	NA	NA	NA
Cluster_39380	scaffold_8	1862299	1862628	334.922	607.604	406.156	0	0	2.14514	NA	NA	NA	NA	te4213
Cluster_39381	scaffold_8	1862956	1863850	67.2339	85.1271	69.959	1.49949	1.41001	0.395473	NA	NA	NA	NA	te4215,te4216
Cluster_39396	scaffold_8	1909792	1910721	3367.67	633.021	3982.76	5.77222	2.71388	0.570884	NA	NA	NA	NA	te4264
Cluster_39399	scaffold_8	1912745	1913305	3198.91	254.372	5395.65	7.17669	4.49895	48.5811	NA	NA	NA	NA	te4268,te4269
Cluster_39403	scaffold_8	1915320	1916039	51.7372	7.39044	85.6041	0	7.88723	89.4702	NA	NA	NA	NA	te4273
Cluster_39408	scaffold_8	1946905	1947681	69.542	1.55643	3.77735	0	2.43621	0	NA	NA	NA	NA	te4297,te4298
Cluster_39409	scaffold_8	1947826	1949795	183.688	5.89326	14.4019	0	17.2958	0	NA	NA	NA	NA	te4299,te4300
Cluster_39411	scaffold_8	1951354	1951816	61.0046	0	0	0	5.45121	0	NA	NA	NA	NA	NA
Cluster_39448	scaffold_8	2036323	2037535	23.9603	1.19638	16.1308	1.10638	6.76234	53.3986	NA	NA	NA	NA	te49676,te49677
Cluster_39457	scaffold_8	2054200	2054935	127.365	218.865	134.255	3.64685	1.71461	1.20227	NA	NA	NA	NA	te49701
Cluster_39501	scaffold_8	2128021	2129919	2410.4	360.193	1189.04	3307.4	3653.63	6.24395	NA	NA	NA	NA	te49778,te49779,te49780,te49781
Cluster_39526	scaffold_8	2212196	2213168	29.8703	5.96594	17.0932	4.13784	11.6728	63.4779	NA	NA	NA	NA	te49852,te49853
Cluster_39589	scaffold_8	2331527	2332921	31.985	6.0684	18.2342	8.65833	27.1388	20.1712	NA	NA	NA	NA	te50012
Cluster_39594	scaffold_8	2349775	2350578	60.0786	7.5208	27.9871	3.33841	32.9615	17.8295	NA	NA	NA	NA	te50013
Cluster_39604	scaffold_8	2361928	2362476	41.0095	5.28676	24.9484	2.44452	49.4209	18.052	NA	NA	NA	NA	NA
Cluster_39614	scaffold_8	2393770	2394274	46.2038	0.957897	5.81188	0	8.74623	9.46198	NA	NA	NA	NA	te50057,te50058,te50059,te50060
Cluster_39640	scaffold_8	2426643	2427280	145.005	5.30747	122.675	4.20702	54.3947	30.7902	NA	NA	NA	NA	NA
Cluster_39646	scaffold_8	2442552	2442786	121.934	0	12.4894	0	0	0	NA	NA	NA	NA	te50120
Cluster_39664	scaffold_8	2470270	2471397	51.1687	2.35865	13.0097	1.18975	6.71253	91.468	NA	NA	NA	NA	te50145,te50146,te50147
Cluster_39727	scaffold_8	2586528	2588016	32.9899	0.487312	0.65704	0	10.1702	2.37709	NA	NA	NA	NA	te50266
Cluster_39733	scaffold_8	2594187	2594501	77.9713	9.9819	27.9524	0	22.0342	2.80911	NA	NA	NA	NA	te50277,te50278
Cluster_39734	scaffold_8	2594613	2595425	43.3014	0.595004	4.81345	0	13.1939	1.30608	Carubv10026015m.g	AT5G42940	0	RING/U-box superfamily protein	NA
Cluster_39829	scaffold_8	2814426	2814814	90.4988	9.32657	108.145	0	22.7087	415.821	NA	NA	NA	NA	te50574
Cluster_39924	scaffold_8	2955372	2956893	26.0886	0	4.49956	0	19.4849	2.90693	NA	NA	NA	NA	te50725
Cluster_39925	scaffold_8	2957022	2957934	39.007	0	1.07156	0	8.29325	1.35687	NA	NA	NA	NA	te50727
Cluster_39926	scaffold_8	2958087	2958442	65.5419	0	0	0	3.54482	28.3357	NA	NA	NA	NA	NA
Cluster_39933	scaffold_8	2964339	2964997	67.7073	1440.94	1.48457	2.03648	2.87243	2.95404	NA	NA	NA	NA	te50733
Cluster_39981	scaffold_8	3041661	3042053	57.2881	1.84633	2.4894	0	0	25.668	NA	NA	NA	NA	te90803,te90804
Cluster_40025	scaffold_8	3104370	3104894	58.4785	0	0	0	2.40373	0	NA	NA	NA	NA	te90912,te90913,te90914,te90915
Cluster_40028	scaffold_8	3110363	3110908	85.4686	0.442984	17.9182	0	16.1789	56.7225	NA	NA	NA	NA	te90927
Cluster_40054	scaffold_8	3146405	3147166	44.0507	1359.16	50.0722	54.5974	62.9322	0	NA	NA	NA	NA	te90986,te90987,te90988
Cluster_40076	scaffold_8	3169180	3170289	139.769	278.258	118.105	0	0.568449	7.01519	NA	NA	NA	NA	te91027
Cluster_40089	scaffold_8	3181522	3182135	125.338	4.33316	65.3284	34.9717	75.0186	56.7816	NA	NA	NA	NA	te91061,te91062
Cluster_40110	scaffold_8	3223095	3224368	26.0261	4.1767	0	0	2.47637	1.25021	NA	NA	NA	NA	te91122,te91123,te91124,te91125,te91126
Cluster_40111	scaffold_8	3224727	3225163	111.47	278.952	76.1174	0	0	2.42985	NA	NA	NA	NA	NA
Cluster_40152	scaffold_8	3278561	3279319	35.0563	20.7134	97.9622	76.0313	138	37.0736	NA	NA	NA	NA	te91194,te91195
Cluster_40201	scaffold_8	3350721	3350970	183.389	50.3088	152.62	0	90.8608	92.0265	NA	NA	NA	NA	te91316
Cluster_40233	scaffold_8	3388954	3391538	32.6213	0.748531	3.40619	17.6516	17.3305	13.3501	NA	NA	NA	NA	te91365,te91366,te91367,te91368
Cluster_40250	scaffold_8	3405834	3406908	42.2677	0	2.73023	0	3.52174	17.7797	NA	NA	NA	NA	te91385,te91386,te91387
Cluster_40259	scaffold_8	3413256	3414615	16.8556	0.889225	5.03554	14.8019	14.8465	42.2916	NA	NA	NA	NA	te91398,te91399
Cluster_40268	scaffold_8	3441683	3443927	143.318	184.338	191.309	1660.07	1975.28	20.9689	NA	NA	NA	NA	te91427,te91428,te91429,te91430,te91431
Cluster_40314	scaffold_8	3498012	3498534	43.0482	12.4865	16.8356	2.56604	31.3679	2.0303	NA	NA	NA	NA	te91496,te91497,te91498
Cluster_40340	scaffold_8	3540604	3541770	74.0126	0.414514	3.35333	0	5.40684	2.42638	NA	NA	NA	NA	te91523,te91524
Cluster_40380	scaffold_8	3580883	3581568	54.3014	5.28868	27.0967	0	22.9948	32.7634	NA	NA	NA	NA	te91581,te91582
Cluster_40410	scaffold_8	3604958	3605504	53.8815	1.32652	14.3083	0	29.9916	4.5295	NA	NA	NA	NA	te91599
Cluster_40411	scaffold_8	3605606	3606915	90.3068	0.553899	7.46819	3.07338	32.7531	0.135095	NA	NA	NA	NA	te91601,te91602,te91603,te91604,te91605
Cluster_40412	scaffold_8	3607005	3608473	40.6841	0.493946	5.32788	0.913574	12.4563	0.96378	NA	NA	NA	NA	te91606,te91607,te91608,te91609,te91610
Cluster_40514	scaffold_8	3722450	3723378	47.1479	6.76921	4.21241	0	10.8672	0.761998	NA	NA	NA	NA	te91749
Cluster_40525	scaffold_8	3730191	3730899	125.865	311.803	144.887	0	0.889955	0.249611	NA	NA	NA	NA	te91770,te91771
Cluster_40526	scaffold_8	3731103	3731539	422.464	1299.56	418.646	6.14206	0	1.21493	NA	NA	NA	NA	te91772
Cluster_40602	scaffold_8	3821502	3821700	152.22	17.0159	58.9949	0	82.4394	5.3359	NA	NA	NA	NA	te91861
Cluster_40607	scaffold_8	3827700	3827935	400.677	107.611	306.765	62.5527	569.484	146.229	NA	NA	NA	NA	NA
Cluster_40662	scaffold_8	3897955	3899022	47.1442	7.47348	6.41229	1.25659	18.3149	4.14265	NA	NA	NA	NA	te91932,te91933
Cluster_40682	scaffold_8	3914804	3915129	114.266	5.19351	6.00204	0	36.7748	8.68585	NA	NA	NA	NA	te91945
Cluster_40719	scaffold_8	3972650	3973409	29.624	3.50074	11.5855	3.53169	39.8512	4.89007	NA	NA	NA	NA	te92004,te92005
Cluster_40773	scaffold_8	4034125	4034702	48.867	5.0215	0	11.6093	7.6416	0.306184	NA	NA	NA	NA	te82119,te82120
Cluster_40774	scaffold_8	4034802	4035365	39.9188	1.71538	3.46927	0	12.3063	1.25514	NA	NA	NA	NA	te82120,te82121
Cluster_40795	scaffold_8	4060600	4061397	45.6543	2.42475	9.80785	0	38.7443	3.9919	NA	NA	NA	NA	te82145,te82146,te82147
Cluster_40811	scaffold_8	4076795	4077410	37.8781	0	6.35281	0	6.14589	9.48076	NA	NA	NA	NA	te82171
Cluster_40868	scaffold_8	4131508	4132653	21.0747	1.26633	7.68324	62.0664	106.815	12.9719	NA	NA	NA	NA	te82238
Cluster_40971	scaffold_8	4404994	4405352	86.6589	6.06357	16.351	11.2148	47.4552	20.2115	NA	NA	NA	NA	te82539
Cluster_40978	scaffold_8	4422267	4422487	192.635	14.2276	92.9638	85.0161	117.059	103.302	NA	NA	NA	NA	te82544
Cluster_40979	scaffold_8	4422602	4423582	27.5403	4.68452	12.9647	10.9443	15.4368	14.6125	NA	NA	NA	NA	te82544
Cluster_40981	scaffold_8	4424204	4425442	22.7967	1.36649	7.10653	3.24949	11.2038	14.4265	NA	NA	NA	NA	te82545,te82544
Cluster_40994	scaffold_8	4434649	4435387	44.8678	0.654585	5.29544	0	34.1531	0	NA	NA	NA	NA	te82549,te82550
Cluster_40996	scaffold_8	4439712	4441064	26.9269	3.21777	10.8463	0.9919	13.0579	7.58647	NA	NA	NA	NA	te82558,te82559,te82557
Cluster_41006	scaffold_8	4449921	4450874	102.552	7.60595	27.6887	5.627	33.0701	23.0029	NA	NA	NA	NA	te82565,te82566
Cluster_41070	scaffold_8	4618813	4619385	85.0132	2.11055	6.82955	0	40.7438	3.08855	NA	NA	NA	NA	te81580
Cluster_41077	scaffold_8	4626053	4626692	40.2953	0.37792	6.11458	0	16.7604	0.276522	NA	NA	NA	NA	te81590
Cluster_41078	scaffold_8	4627212	4628074	31.306	3.36319	7.93549	0	20.4721	2.66589	NA	NA	NA	NA	te81593
Cluster_41080	scaffold_8	4628803	4629406	44.7302	0.800891	6.47903	0	22.9826	0.586007	NA	NA	NA	NA	te81593,te81594
Cluster_41081	scaffold_8	4629715	4630951	19.1934	1.95529	3.95446	0	22.9539	2.86134	NA	NA	NA	NA	te81596
Cluster_41149	scaffold_8	4703178	4704718	20.7198	5.65041	24.125	54.866	86.3961	5.62734	NA	NA	NA	NA	te81681,te81682
Cluster_41197	scaffold_8	4782981	4783845	41.1716	1.39809	14.7033	0	32.8255	1.84135	Carubv10027552m.g	AT5G48050	0	0	te81783
Cluster_41228	scaffold_8	4829228	4829770	58.0477	4.45431	9.00859	0	17.4303	14.6664	NA	NA	NA	NA	te81842,te81843
Cluster_41263	scaffold_8	4872783	4874293	20.3185	1.60072	5.17979	0	9.18697	27.0556	NA	NA	NA	NA	te81900,te81901,te81902,te81903
Cluster_41270	scaffold_8	4880034	4881760	49.5391	0.980361	1.69948	0	8.03794	3.58662	NA	NA	NA	NA	te81922
Cluster_41272	scaffold_8	4891569	4892938	24.2024	12.5348	21.4233	0	13.3565	36.8158	NA	NA	NA	NA	te81927
Cluster_41332	scaffold_8	4954853	4955813	55.375	0.50337	7.12625	0	9.19219	30.5699	NA	NA	NA	NA	te82025
Cluster_41342	scaffold_8	4964346	4965019	45.5507	2.87085	4.3546	0	12.1702	59.3415	NA	NA	NA	NA	te82040,te82039
Cluster_41357	scaffold_8	4977253	4978662	1751.2	5308.94	411.455	10.4698	8.05504	0.376541	NA	NA	NA	NA	te82056
Cluster_41398	scaffold_8	5032121	5033425	18.507	1.29738	8.24648	1.02838	16.4393	4.88204	NA	NA	NA	NA	te43272
Cluster_41469	scaffold_8	5126245	5126706	142.652	3.14116	65.6457	2.90485	6.82877	32.1771	NA	NA	NA	NA	NA
Cluster_41576	scaffold_8	5311229	5311957	950.656	856.329	844.131	1.84093	0	0	NA	NA	NA	NA	te43576,te43577
Cluster_41593	scaffold_8	5359568	5363304	134.296	1827.84	57.3334	1.79561	0.168846	12.7865	Carubv10026290m.g, Carubv10026050m.g	AT5G48450, AT5G48460	sks3, 0	SKU5 similar 3, Actin binding Calponin homology (CH) domain-containing protein	te43617,te43618,te43619,te43620
Cluster_41616	scaffold_8	5390216	5391723	19.0016	1.60391	1.94629	0	2.51052	25.3491	NA	NA	NA	NA	te43649,te43650,te43651
Cluster_41622	scaffold_8	5422586	5423802	30.6087	3.97484	11.2544	0	9.33246	102.811	NA	NA	NA	NA	te43683,te43682
Cluster_41624	scaffold_8	5424302	5425543	19.7753	0.778966	2.36312	0	4.57231	21.9436	NA	NA	NA	NA	te43684,te43685,te43686
Cluster_41649	scaffold_8	5523019	5523889	815.879	406.818	2754.16	81.6626	210.809	7.51784	Carubv10028693m.g, Carubv10027389m.g	AT1G50820, AT4G12590	0,0	Aminotransferase-like, plant mobile domain family protein, Protein of unknown function DUF106, transmembrane	te43795
Cluster_41736	scaffold_8	5747010	5747331	108.058	106.663	39.4979	4.16783	0	0.549609	NA	NA	NA	NA	te44017
Cluster_41993	scaffold_8	6511716	6512745	2983.88	4009.16	1734.4	6.51476	3.063	0	NA	NA	NA	NA	NA
Cluster_41994	scaffold_8	6512844	6514856	1633.53	4717.23	708.599	2.66675	2.19416	0.175831	Carubv10028395m.g	AT5G50115	0	0	te5573
Cluster_41998	scaffold_8	6516296	6517171	82.2437	47.4903	8.93455	0	0	0	Carubv10028594m.g	AT5G50115	0	0	NA
Cluster_42001	scaffold_8	6519244	6520656	180.195	578.569	58.1599	0.949781	0.446552	0	Carubv10026202m.g	AT5G50520	0	Major facilitator superfamily protein	NA
Cluster_42083	scaffold_8	6743581	6743956	63.1443	36.0231	101.476	0	0	0.470676	NA	NA	NA	NA	te5696
Cluster_42084	scaffold_8	6744172	6745451	1696.24	405.887	2401.5	1.04847	0.492952	0.829566	Carubv10028162m.g	AT1G11370	0	Pectin lyase-like superfamily protein	NA
Cluster_42089	scaffold_8	6753044	6754687	16.9317	0	1.19019	0	1.91903	8.07364	NA	NA	NA	NA	te5707,te5708
Cluster_42267	scaffold_8	7474546	7476073	290.402	271.786	210.649	0	2.47766	3.47462	NA	NA	NA	NA	te52767,te52768
Cluster_42273	scaffold_8	7490795	7491480	451.12	720.671	78.4378	5.86898	0	0	Carubv10026599m.g	AT5G52830	ATWRKY27,WRKY27	WRKY DNA-binding protein 27	NA
Cluster_42275	scaffold_8	7501826	7503337	131.577	1073.69	20.7055	2.66278	2.08657	0	NA	NA	NA	NA	te52785,te52786
Cluster_42288	scaffold_8	7545187	7549799	3470.82	3254.51	4065.82	3.49111	2.87243	0.498735	NA	NA	NA	NA	te52844,te52845,te52846,te52847,te52848,te52849,te52850
Cluster_42307	scaffold_8	7631202	7631853	197.141	23.3708	21.0071	0	15.4841	19.0003	NA	NA	NA	NA	te52886
Cluster_42308	scaffold_8	7631945	7633328	37.8589	4.19426	4.24133	1.93936	3.19136	15.2167	NA	NA	NA	NA	te52887
Cluster_42387	scaffold_8	8031598	8032747	159.468	3918.07	130.161	2.33398	1.09735	0.153891	Carubv10027756m.g	AT5G54067	0	0	NA
Cluster_42408	scaffold_8	8079251	8079809	51.9925	2866.52	1.75015	9.60315	3.38629	0	NA	NA	NA	NA	te59238
Cluster_42437	scaffold_8	8170895	8172899	2458.14	6897.55	1362.35	10.0402	6.60875	0	Carubv10027714m.g	AT5G54350	0	0	te59294
Cluster_42579	scaffold_8	8804990	8806113	1765.59	105.872	2281.33	1.19399	2.80684	0.314901	NA	NA	NA	NA	NA
Cluster_42580	scaffold_8	8806239	8806996	965.589	13.0826	1095.78	3.541	2.49727	0.46695	NA	NA	NA	NA	NA
Cluster_42581	scaffold_8	8807095	8807350	99.1393	0	168.151	0	0	0	Carubv10027600m.g	AT5G56075	0	Domain of unknown function (DUF2431)	NA
Cluster_42981	scaffold_8	10543027	10544081	48.8891	18.7993	54.7125	630.95	232.654	33.7173	Carubv10026391m.g	AT5G60390	0	GTP binding Elongation factor Tu family protein	NA
Cluster_42987	scaffold_8	10557441	10559715	856.665	3806.86	196.097	2.35963	3.05088	0.155582	Carubv10028580m.g	AT5G60440	AGL62	AGAMOUS-like 62	te99196,te99197,te99198,te99199
Cluster_42988	scaffold_8	10560147	10561857	910.808	4667.04	130.368	7.05924	0.737555	1.34463	Carubv10025912m.g	AT5G60450	ARF4	auxin response factor 4	NA
Cluster_43010	scaffold_8	10684101	10684520	56.5292	0	27.9524	0	0	380.916	NA	NA	NA	NA	te99278
Cluster_43067	scaffold_8	10946009	10946273	98.8617	0.912714	125.522	0	0	0	NA	NA	NA	NA	NA
Cluster_43113	scaffold_8	11234155	11235753	127.234	1264.71	32.4275	2.5179	5.52451	0	Carubv10028086m.g	AT5G62110	0	Homeodomain-like superfamily protein	NA
Cluster_43114	scaffold_8	11236186	11237580	45.7767	1742.15	13.325	6.73425	13.5694	0.380589	Carubv10028086m.g	AT5G62110	0	Homeodomain-like superfamily protein	te60558
Cluster_43186	scaffold_8	11693084	11693765	37.8138	10.2848	32.9936	1.9678	17.5786	90.044	NA	NA	NA	NA	te60811
Cluster_43304	scaffold_8	12255803	12255996	466.321	86.0256	211.804	0	104.079	679.617	NA	NA	NA	NA	te81050
Cluster_43415	scaffold_8	12791838	12793011	30.3351	0.824085	5.83333	1.14314	3.76222	55.1725	NA	NA	NA	NA	te81335
Cluster_43440	scaffold_8	12933282	12934270	26.9036	214.478	4.94607	1.35697	3.18998	0	Carubv10028584m.g	AT5G67120	0	RING/U-box superfamily protein	te81427,te81428
Cluster_43441	scaffold_8	12934402	12936203	3673.24	5169.85	2512.07	9.68176	3.50154	0.0982098	Carubv10028584m.g	AT5G67120	0	RING/U-box superfamily protein	te81429,te81430
Cluster_43442	scaffold_8	12936397	12938587	1413.95	3229.41	1102.91	4.28767	1.15195	0	Carubv10028570m.g, Carubv10027878m.g	AT5G67110, AT5G67100	ALC, ICU2	basic helix-loop-helix (bHLH) DNA-binding superfamily protein, DNA-directed DNA polymerases	NA
Cluster_43450	scaffold_8	13002758	13003345	647.44	482.915	570.694	0	3.21928	2.70879	NA	NA	NA	NA	te34820
