# Supplementary material for: Dosage sensitive maternal siRNAs determine hybridization success in Capsella
Source: Research Square preprint supplement (doi:10.21203/rs.3.rs-3705839/v1), 2023-12-06
Supplement: Supplementary file 3 [file e18d6b548b4a8b824d2a7e87.xlsx]

## Sheet: Cr x Cg
Supplementary Table 1. Gene expression in all analyzed genotypes.
DESeq2 analysis of Co x Cr vs Co x Co.
Gene	log2FoldChange	padj	Ath ortholog	Ath annotations	Ath annotations
Carubv10010485m.g	-0.0155129	0.949936	AT1G02140	HAP1,MAGO,MEE63	mago nashi family protein
Carubv10011809m.g	0.0416481	0.872862	AT1G02145	ALG12,EBS4	homolog of asparagine-linked glycosylation 12
Carubv10011354m.g	1.50806	2.15424e-13	AT1G02150	0	Tetratricopeptide repeat (TPR)-like superfamily protein
Carubv10011359m.g	-0.397789	0.108054	AT1G02160	0	Cox19 family protein (CHCH motif)
Carubv10011418m.g	-0.164131	0.426886	AT1G02170	AMC1,ATMC1,ATMCPB1,LOL3,MCP1B	metacaspase 1
Carubv10008574m.g	4.05669	3.50082e-06	AT1G02190	0	Fatty acid hydroxylase superfamily
Carubv10008547m.g	0.933315	0.256955	AT1G02205	CER1	Fatty acid hydroxylase superfamily
Carubv10010169m.g	0.199318	0.411601	AT1G02130	ARA-5,ARA5,ATRAB1B,ATRABD2A,RA-5,RABD2A	RAS 5
Carubv10008556m.g	-0.635221	0.00351164	AT1G02120	VAD1	GRAM domain family protein
Carubv10008455m.g	0.551672	0.0274105	AT1G02110	0	Protein of unknown function (DUF630 and DUF632)
Carubv10009548m.g	0.140591	0.538666	AT1G02100	0	Leucine carboxyl methyltransferase
Carubv10009724m.g	0.560704	0.00504302	AT1G02090	ATCSN7,COP15,CSN7,FUS5	Proteasome component (PCI) domain protein
Carubv10009759m.g	1.15763	0.00264205	AT2G35680	0	Phosphotyrosine protein phosphatases superfamily protein
Carubv10012145m.g	0.343174	0.0755106	AT1G02080	0	transcription regulators
Carubv10011621m.g	0.161667	NA	AT1G02070	0	0
Carubv10009506m.g	-0.00610445	NA	AT1G02065	SPL8	squamosa promoter binding protein-like 8
Carubv10011958m.g	1.16445	0.000338789	AT1G02060	0	Tetratricopeptide repeat (TPR)-like superfamily protein
Carubv10011272m.g	0.992222	0.0143913	AT1G02040	0	C2H2-type zinc finger family protein
Carubv10008571m.g	0.432002	0.0897077	AT1G02020	0	nitroreductase family protein
Carubv10008507m.g	-0.00444902	0.987103	AT1G02010	SEC1A	secretory 1A
Carubv10011557m.g	0.131562	0.699011	AT1G01990	0	0
Carubv10011221m.g	-2.41992	1.05407e-06	AT1G01980	ATSEC1A,SEC1A	FAD-binding Berberine family protein
Carubv10009324m.g	0.976903	0.000315424	AT1G01970	0	Tetratricopeptide repeat (TPR)-like superfamily protein
Carubv10008079m.g	-0.854672	0.000258017	AT1G01960	EDA10	SEC7-like guanine nucleotide exchange family protein
Carubv10008265m.g	-0.151793	0.552056	AT1G01950	ARK2	armadillo repeat kinesin 2
Carubv10012351m.g	0.556793	0.00450239	AT1G01940	0	Cyclophilin-like peptidyl-prolyl cis-trans isomerase family protein
Carubv10008663m.g	0.206012	0.491367	AT1G01930	0	zinc finger protein-related
Carubv10008771m.g	0.0330051	0.900241	AT1G01920	0	SET domain-containing protein
Carubv10009581m.g	-0.243821	0.219789	AT1G01910	0	P-loop containing nucleoside triphosphate hydrolases superfamily protein
Carubv10008379m.g	-3.37591	1.8522e-42	AT1G01900	ATSBT1.1,SBTI1.1	subtilase family protein
Carubv10011785m.g	-0.0655395	0.811222	AT1G01880	0	5\'-3\' exonuclease family protein
Carubv10009683m.g	0.490356	0.0454961	AT1G01860	PFC1	Ribosomal RNA adenine dimethylase family protein
Carubv10011703m.g	-0.470954	NA	AT1G01840	0	0
Carubv10008707m.g	-1.9515	3.31214e-22	AT1G01830	0	ARM repeat superfamily protein
Carubv10012511m.g	1.61736	0.00175923	AT1G01810	0	0
Carubv10011770m.g	0.982801	1.33704e-05	AT1G01790	ATKEA1,KEA1	K+ efflux antiporter 1
Carubv10010886m.g	-0.3832	0.123372	AT1G01780	0	GATA type zinc finger transcription factor family protein
Carubv10012179m.g	-0.202513	0.348872	AT1G01770	0	0
Carubv10011834m.g	-0.45874	0.0820144	AT1G01760	0	adenosine deaminases;RNA binding;RNA binding;adenosine deaminases
Carubv10011760m.g	-0.143779	0.758126	AT1G01750	ADF11	actin depolymerizing factor 11
Carubv10012619m.g	-0.470954	NA	AT1G01740	0	Protein kinase protein with tetratricopeptide repeat domain
Carubv10010200m.g	0.400743	0.0752275	AT1G01730	0	0
Carubv10009926m.g	1.37959	4.9383e-06	AT1G01720	ANAC002,ATAF1	NAC (No Apical Meristem) domain transcriptional regulator superfamily protein
Carubv10009215m.g	-0.513645	0.00260658	AT1G01710	0	Acyl-CoA thioesterase family protein
Carubv10010705m.g	-0.470954	NA	AT4G00480	ATMYC1,myc1	basic helix-loop-helix (bHLH) DNA-binding superfamily protein
Carubv10011721m.g	0.493639	0.726735	AT1G01700	ATROPGEF2,ROPGEF2	RHO guanyl-nucleotide exchange factor 2
Carubv10009199m.g	0.791827	0.0327314	AT1G01695	0	Phosphatidylinositol N-acetyglucosaminlytransferase subunit P-related
Carubv10009137m.g	-0.43099	0.0740028	AT1G01690	ATPRD3,PRD3	putative recombination initiation defects 3
Carubv10009781m.g	1.77667	7.78853e-06	AT1G01680	ATPUB54,PUB54	plant U-box 54
Carubv10009194m.g	0.259443	0.585244	AT1G01670	0	RING/U-box superfamily protein
Carubv10008712m.g	0.565558	0.600403	AT1G01660	0	RING/U-box superfamily protein
Carubv10008675m.g	-0.790374	0.00145359	AT1G01650	ATSPPL4,SPPL4	SIGNAL PEPTIDE PEPTIDASE-LIKE 4
Carubv10012544m.g	-0.470954	NA	AT1G01640	0	BTB/POZ domain-containing protein
Carubv10010070m.g	-2.73523	2.90745e-28	AT1G01630	0	Sec14p-like phosphatidylinositol transfer family protein
Carubv10009929m.g	-0.417143	0.435716	AT1G01620	PIP1;3,PIP1C,TMP-B	plasma membrane intrinsic protein 1C
Carubv10008926m.g	0.156992	0.655805	AT1G01610	ATGPAT4,GPAT4	glycerol-3-phosphate acyltransferase 4
Carubv10011916m.g	-0.281092	0.441265	AT1G03000	PEX6	peroxin 6
Carubv10010662m.g	2.39829	5.48451e-08	AT1G01600	CYP86A4	cytochrome P450, family 86, subfamily A, polypeptide 4
Carubv10011562m.g	0.261407	0.879575	AT1G01600	CYP86A4	cytochrome P450, family 86, subfamily A, polypeptide 4
Carubv10008441m.g	0.375288	0.802797	AT1G01580	ATFRO2,FRD1,FRO2	ferric reduction oxidase 2
Carubv10008901m.g	0.648708	0.276277	AT1G01570	0	Protein of unknown function (DUF604)
Carubv10009488m.g	1.09429	0.439578	AT1G01560	ATMPK11,MPK11	MAP kinase 11
Carubv10009625m.g	-0.398442	0.0111412	AT1G01550	BPS1	Protein of unknown function (DUF793)
Carubv10011595m.g	-1.99236	5.12077e-31	AT1G01540	0	Protein kinase superfamily protein
Carubv10010156m.g	7.39459	7.94871e-57	AT1G01530	AGL28	AGAMOUS-like 28
Carubv10011679m.g	-0.393855	0.466601	AT1G01520	0	Homeodomain-like superfamily protein
Carubv10011468m.g	-0.603041	0.00087746	AT1G01510	AN	NAD(P)-binding Rossmann-fold superfamily protein
Carubv10009744m.g	-0.279086	0.411601	AT1G01500	0	Erythronate-4-phosphate dehydrogenase family protein
Carubv10009396m.g	-1.22203	0.508696	AT1G01480	ACS2,AT-ACC2	1-amino-cyclopropane-1-carboxylate synthase 2
Carubv10010557m.g	0.399545	0.38028	AT1G01470	LEA14,LSR3	Late embryogenesis abundant protein
Carubv10009221m.g	-0.809534	0.390806	AT1G01460	ATPIPK11,PIPK11	Phosphatidylinositol-4-phosphate 5-kinase, core
Carubv10010006m.g	1.99406	0.136148	AT1G01453	0	0
Carubv10010980m.g	-1.19072	9.30169e-06	AT1G01450	0	Protein kinase superfamily protein
Carubv10008546m.g	-0.133485	0.616795	AT1G01440	0	Protein of unknown function (DUF3133)
Carubv10009105m.g	-0.717644	0.004503	AT1G01430	TBL25	TRICHOME BIREFRINGENCE-LIKE 25
Carubv10011054m.g	-2.21614	0.0272013	AT1G01390	0	UDP-Glycosyltransferase superfamily protein
Carubv10011382m.g	0.698012	0.531355	AT1G01380	ETC1	Homeodomain-like superfamily protein
Carubv10010436m.g	0.35225	0.420073	AT1G01370	CENH3,HTR12	Histone superfamily protein
Carubv10010391m.g	-0.319144	0.347664	AT1G01360	PYL9,RCAR1	regulatory component of ABA receptor 1
Carubv10009639m.g	0.418809	0.0256296	AT1G01350	0	Zinc finger (CCCH-type/C3HC4-type RING finger) family protein
Carubv10008437m.g	0.567361	0.48651	AT1G01340	ACBK1,ATCNGC10,CNGC10	cyclic nucleotide gated channel 10
Carubv10011109m.g	0.974817	0.0161412	AT1G01320	0	Tetratricopeptide repeat (TPR)-like superfamily protein
Carubv10012656m.g	-1.77746	0.000141637	AT1G01310	0	CAP (Cysteine-rich secretory proteins, Antigen 5, and Pathogenesis-related 1 protein) superfamily protein
Carubv10009005m.g	0.917445	0.0433042	AT1G01300	0	Eukaryotic aspartyl protease family protein
Carubv10009994m.g	0.439103	0.135023	AT1G01290	CNX3	cofactor of nitrate reductase and xanthine dehydrogenase 3
Carubv10011315m.g	1.60907	0.238323	AT1G01280	CYP703,CYP703A2	cytochrome P450, family 703, subfamily A, polypeptide 2
Carubv10008640m.g	0.0429437	0.882027	AT1G01260	0	basic helix-loop-helix (bHLH) DNA-binding superfamily protein
Carubv10010347m.g	1.1003	0.113068	AT1G01250	0	Integrase-type DNA-binding superfamily protein
Carubv10009708m.g	-1.07509	0.00235886	AT1G01240	0	0
Carubv10010529m.g	-1.22948	1.76037e-07	AT1G01230	0	ORMDL family protein
Carubv10010395m.g	-0.728727	0.15009	AT1G01225	0	NC domain-containing protein-related
Carubv10010167m.g	0.381358	0.562114	AT1G01200	ATRAB-A3,ATRABA3,RABA3	RAB GTPase homolog A3
Carubv10008749m.g	0.352788	NA	AT1G01190	CYP78A8	cytochrome P450, family 78, subfamily A, polypeptide 8
Carubv10009834m.g	1.05973	0.450944	AT1G01180	0	S-adenosyl-L-methionine-dependent methyltransferases superfamily protein
Carubv10010775m.g	-1.70378	0.0460122	AT1G01170	0	Protein of unknown function (DUF1138)
Carubv10010354m.g	-0.470954	NA	AT1G01160	GIF2	GRF1-interacting factor 2
Carubv10009814m.g	-0.336536	0.760009	AT1G01150	0	Homeodomain-like protein with RING/FYVE/PHD-type zinc finger domain
Carubv10009130m.g	0.345845	0.131295	AT1G01140	CIPK9,PKS6,SnRK3.12	CBL-interacting protein kinase 9
Carubv10012263m.g	0.0135802	0.984259	AT1G01120	KCS1	3-ketoacyl-CoA synthase 1
Carubv10008796m.g	2.09804	0.00643703	AT1G01110	IQD18	IQ-domain 18
Carubv10010699m.g	-0.0087952	0.973773	AT4G00810	0	60S acidic ribosomal protein family
Carubv10009201m.g	-0.211714	0.322539	AT1G01090	PDH-E1 ALPHA	pyruvate dehydrogenase E1 alpha
Carubv10009913m.g	1.10228	0.00436662	AT1G01080	0	RNA-binding (RRM/RBD/RNP motifs) family protein
Carubv10009303m.g	-1.24552	NA	AT1G01070	0	nodulin MtN21 /EamA-like transporter family protein
Carubv10008551m.g	-0.26512	0.600653	AT1G01060	LHY,LHY1	Homeodomain-like superfamily protein
Carubv10010288m.g	-0.470954	NA	AT1G01050	AtPPa1,PPa1	pyrophosphorylase 1
Carubv10008073m.g	0.219151	0.439541	AT1G01040	ASU1,ATDCL1,CAF,DCL1,EMB60,EMB76,SIN1,SUS1	dicer-like 1
Carubv10009540m.g	-1.52503	0.249024	AT1G01030	NGA3	AP2/B3-like transcriptional factor family protein
Carubv10011984m.g	-0.470954	NA	AT1G01020	ARV1	Arv1-like protein
Carubv10009451m.g	3.06947	7.97025e-09	AT1G01010	ANAC001,NAC001	NAC domain containing protein 1
Carubv10009049m.g	0.200878	0.547946	AT1G01010	ANAC001,NAC001	NAC domain containing protein 1
Carubv10011623m.g	-3.91818	0.000277785	AT3G04430	anac049,NAC049	NAC domain containing protein 49
Carubv10009390m.g	1.86263	0.0269651	AT1G02220	ANAC003,NAC003	NAC domain containing protein 3
Carubv10009727m.g	0.988963	NA	AT1G02250	anac005,NAC005	NAC domain containing protein 5
Carubv10008913m.g	-0.840634	0.00245243	AT1G02260	0	Divalent ion symporter
Carubv10008987m.g	-0.175258	0.438335	AT1G02270	0	Calcium-binding endonuclease/exonuclease/phosphatase family
Carubv10011793m.g	-1.41422	0.359953	AT2G41610	0	0
Carubv10009713m.g	2.46296	0.00193993	AT3G62850	0	zinc finger protein-related
Carubv10010930m.g	0.305723	0.155845	AT1G02280	ATTOC33,PPI1,TOC33	translocon at the outer envelope membrane of chloroplasts 33
Carubv10012070m.g	-0.355941	0.119067	AT1G02290	0	0
Carubv10009537m.g	-0.0900711	0.674791	AT1G02305	0	Cysteine proteinases superfamily protein
Carubv10011405m.g	1.87566	0.0289772	AT1G02310	MAN1	Glycosyl hydrolase superfamily protein
Carubv10011322m.g	1.55909	0.117407	AT4G01630	ATEXP17,ATEXPA17,ATHEXP ALPHA 1.13,EXPA17	expansin A17
Carubv10009977m.g	0.364248	0.105705	AT1G02330	0	0
Carubv10010261m.g	-3.68937	2.8561e-06	AT1G02335	GL22	germin-like protein subfamily 2 member 2 precursor
Carubv10009652m.g	-1.79557	0.0171911	AT1G02340	FBI1,HFR1,REP1,RSF1	basic helix-loop-helix (bHLH) DNA-binding superfamily protein
Carubv10010007m.g	-0.754656	NA	AT1G02360	0	Chitinase family protein
Carubv10008848m.g	0.756397	0.000215048	AT1G02370	0	Tetratricopeptide repeat (TPR)-like superfamily protein
Carubv10010187m.g	-0.06172	0.909484	AT1G02380	0	0
Carubv10008716m.g	-0.565783	0.0874287	AT1G02390	ATGPAT2,GPAT2	glycerol-3-phosphate acyltransferase 2
Carubv10010711m.g	1.55145	0.00586368	0	0	0
Carubv10011406m.g	2.80153	8.00799e-05	AT1G06810	0	0
Carubv10009706m.g	0.374342	0.814593	AT1G02400	ATGA2OX4,ATGA2OX6,DTA1,GA2OX6	gibberellin 2-oxidase 6
Carubv10009922m.g	0.160115	0.48435	AT1G02410	0	cytochrome c oxidase assembly protein CtaG / Cox11 family
Carubv10012086m.g	0.329109	0.241148	AT1G02420	0	Pentatricopeptide repeat (PPR) superfamily protein
Carubv10011316m.g	0.66268	0.12373	AT1G02440	ARFD1A,ATARFD1A	ADP-ribosylation factor D1A
Carubv10010607m.g	-1.47573	NA	AT1G02450	NIMIN-1,NIMIN1	NIM1-interacting 1
Carubv10008847m.g	0.974238	0.34352	AT1G02460	0	Pectin lyase-like superfamily protein
Carubv10011810m.g	-0.886574	0.433471	AT1G02470	0	Polyketide cyclase/dehydrase and lipid transport superfamily protein
Carubv10010960m.g	0.909289	0.000217736	AT1G02475	0	Polyketide cyclase/dehydrase and lipid transport superfamily protein
Carubv10009376m.g	-0.86286	2.41965e-06	AT1G02500	AtSAM1,MAT1,SAM-1,SAM1	S-adenosylmethionine synthetase 1
Carubv10011333m.g	-0.907782	NA	AT1G02510	ATKCO4,ATTPK4,KCO4,TPK4	Outward rectifying potassium channel protein
Carubv10008098m.g	0.278163	0.415793	AT1G02520	PGP11	P-glycoprotein 11
Carubv10011825m.g	-0.471433	NA	AT1G02540	0	0
Carubv10011902m.g	-0.470954	NA	AT1G03490	ANAC006,NAC006	NAC domain containing protein 6
Carubv10011439m.g	0.574632	NA	AT1G02550	0	Plant invertase/pectin methylesterase inhibitor superfamily protein
Carubv10009892m.g	0.394656	0.0757847	AT1G02560	CLPP5,NCLPP1,NCLPP5	nuclear encoded CLP protease 5
Carubv10009964m.g	-1.58246	0.0802111	AT1G02570	0	0
Carubv10012183m.g	4.10562	1.4093e-11	AT1G02580	EMB173,FIS1,MEA,SDG5	SET domain-containing protein
Carubv10010204m.g	-1.04729	0.059162	AT1G02610	0	RING/FYVE/PHD zinc finger superfamily protein
Carubv10010357m.g	-0.297204	0.120494	AT4G02080	ASAR1,ATSAR2,ATSARA1C,SAR2	secretion-associated RAS super family 2
Carubv10008081m.g	-0.633301	0.000711828	AT3G08530	0	Clathrin, heavy chain
Carubv10009401m.g	-0.0918151	NA	AT1G02630	0	Nucleoside transporter family protein
Carubv10008371m.g	-0.651922	0.278218	AT1G02640	ATBXL2,BXL2	beta-xylosidase 2
Carubv10008788m.g	2.46201	2.03735e-07	AT1G02650	0	Tetratricopeptide repeat (TPR)-like superfamily protein
Carubv10011093m.g	-1.05414	0.0001061	AT1G02660	0	alpha/beta-Hydrolases superfamily protein
Carubv10010712m.g	-0.37825	0.636653	0	0	0
Carubv10011279m.g	0.259645	NA	0	0	0
Carubv10010486m.g	0.201731	0.410861	AT1G02680	TAF13	TBP-associated factor 13
Carubv10010400m.g	0.618908	0.471846	AT5G38700	0	0
Carubv10011230m.g	0.0153021	0.97741	AT5G61710	0	0
Carubv10008795m.g	0.728203	0.000834218	AT1G02690	IMPA-6	importin alpha isoform 6
Carubv10010109m.g	-5.66914	6.70324e-17	AT1G02700	0	0
Carubv10009529m.g	-4.94696	1.28074e-11	AT1G02720	GATL5	galacturonosyltransferase 5
Carubv10010155m.g	0.966085	0.0183174	AT1G01355	0	Putative endonuclease or glycosyl hydrolase
Carubv10008123m.g	-1.04973	7.44651e-05	AT1G02730	ATCSLD5,CSLD5,SOS6	cellulose synthase-like D5
Carubv10009970m.g	-0.38289	0.166053	AT1G02740	0	MRG family protein
Carubv10011158m.g	-0.322847	0.575398	AT1G03190	ATXPD,UVH6	RAD3-like DNA-binding helicase protein
Carubv10010253m.g	0.237588	0.492913	AT1G02750	0	Drought-responsive family protein
Carubv10010281m.g	-0.0909092	0.696666	AT1G02780	emb2386	Ribosomal protein L19e family protein
Carubv10012094m.g	-2.45517	2.49494e-12	AT1G02790	PGA4	polygalacturonase 4
Carubv10011914m.g	1.2345	NA	AT1G02800	ATCEL2,CEL2	cellulase 2
Carubv10011654m.g	0.0959633	0.923644	AT1G02810	0	Plant invertase/pectin methylesterase inhibitor superfamily
Carubv10012198m.g	0.708718	NA	AT1G02813	0	Protein of unknown function, DUF538
Carubv10010322m.g	0.335298	0.362609	AT1G02816	0	Protein of unknown function, DUF538
Carubv10010737m.g	1.15044	0.116215	AT1G02820	0	Late embryogenesis abundant 3 (LEA3) family protein
Carubv10012583m.g	-1.88868	0.219646	AT1G02830	0	Ribosomal L22e protein family
Carubv10011110m.g	0.086666	0.87655	AT4G02425	0	0
Carubv10011968m.g	0.0533583	0.846756	AT1G02840	ATSRP34,SR1,SRP34	RNA-binding (RRM/RBD/RNP motifs) family protein
Carubv10008974m.g	-1.13337	0.152187	AT1G02850	BGLU11	beta glucosidase 11
Carubv10009650m.g	1.91259	1.84585e-12	AT1G02860	BAH1,NLA	SPX (SYG1/Pho81/XPR1) domain-containing protein
Carubv10010371m.g	-0.470954	NA	AT1G02870	0	0
Carubv10012039m.g	0.114907	0.649651	AT4G20480	0	Putative endonuclease or glycosyl hydrolase
Carubv10011132m.g	-0.386071	0.196616	AT4G20480	0	Putative endonuclease or glycosyl hydrolase
Carubv10012506m.g	0.309661	0.274777	AT1G02880	TPK1	thiamin pyrophosphokinase1
Carubv10008107m.g	0.688392	5.63646e-05	AT1G02890	0	AAA-type ATPase family protein
Carubv10012118m.g	1.12769	0.43571	AT1G02900	ATRALF1,RALF1,RALFL1	rapid alkalinization factor 1
Carubv10009110m.g	-0.0304314	0.916871	AT1G02910	LPA1	tetratricopeptide repeat (TPR)-containing protein
Carubv10010300m.g	0.212798	0.837233	AT1G02930	ATGST1,ATGSTF3,ATGSTF6,ERD11,GST1,GSTF6	glutathione S-transferase 6
Carubv10012455m.g	3.31162	9.36948e-67	AT1G02930	ATGST1,ATGSTF3,ATGSTF6,ERD11,GST1,GSTF6	glutathione S-transferase 6
Carubv10012405m.g	-3.89259	1.62709e-22	AT1G02940	ATGSTF5,GSTF5	glutathione S-transferase (class phi) 5
Carubv10010097m.g	-2.02758	NA	AT1G02950	ATGSTF4,GST31,GSTF4	glutathione S-transferase F4
Carubv10012349m.g	0.0971754	0.727586	AT1G02960	0	0
Carubv10008963m.g	0.793595	0.00230763	AT1G02970	ATWEE1,WEE1	WEE1 kinase homolog
Carubv10010979m.g	4.1721	8.14561e-32	AT1G02980	ATCUL2,CUL2	cullin 2
Carubv10008104m.g	-0.697599	0.000413404	AT1G02990	0	0
Carubv10011267m.g	-0.349702	0.0846739	AT1G03000	PEX6	peroxin 6
Carubv10008601m.g	-1.20573	NA	AT1G03010	0	Phototropic-responsive NPH3 family protein
Carubv10010921m.g	-0.470954	NA	AT1G03020	0	Thioredoxin superfamily protein
Carubv10009873m.g	0.627007	0.0715803	AT1G03030	0	P-loop containing nucleoside triphosphate hydrolases superfamily protein
Carubv10009831m.g	0.658045	0.00250476	AT1G03040	0	basic helix-loop-helix (bHLH) DNA-binding superfamily protein
Carubv10008628m.g	-0.897821	0.09434	AT1G03050	0	ENTH/ANTH/VHS superfamily protein
Carubv10010025m.g	3.15875	2.11292e-14	AT1G03055	0	0
Carubv10008059m.g	-0.667764	0.00282729	AT1G03060	SPI	Beige/BEACH domain ;WD domain, G-beta repeat protein
Carubv10011301m.g	-0.386881	0.651366	AT1G03070	0	Bax inhibitor-1 family protein
Carubv10008080m.g	0.418075	0.0574202	AT1G03080	0	kinase interacting (KIP1-like) family protein
Carubv10008397m.g	0.361945	0.0782543	AT1G03090	MCCA	methylcrotonyl-CoA carboxylase alpha chain, mitochondrial / 3-methylcrotonyl-CoA carboxylase 1 (MCCA)
Carubv10011829m.g	-0.470954	NA	AT1G03100	0	Pentatricopeptide repeat (PPR) superfamily protein
Carubv10009228m.g	0.902017	4.43542e-07	AT1G03110	0	Transducin/WD40 repeat-like superfamily protein
Carubv10010425m.g	-1.962	5.45475e-09	AT1G03120	ATRAB28,RAB28	responsive to abscisic acid 28
Carubv10012376m.g	0.671561	0.0528583	AT1G03130	PSAD-2	photosystem I subunit D-2
Carubv10011298m.g	0.403143	0.0908948	AT1G03140	0	splicing factor Prp18 family protein
Carubv10010452m.g	0.21192	0.442991	AT1G03150	0	Acyl-CoA N-acyltransferases (NAT) superfamily protein
Carubv10008235m.g	0.494379	0.0205495	AT1G03160	FZL	FZO-like
Carubv10012407m.g	0.174486	0.824432	AT1G03170	0	Protein of unknown function (DUF3049)
Carubv10009697m.g	0.728463	0.0100213	AT1G03180	0	0
Carubv10008351m.g	0.204562	0.367805	AT1G03190	ATXPD,UVH6	RAD3-like DNA-binding helicase protein
Carubv10011636m.g	-0.0296937	0.941841	AT1G03220	0	Eukaryotic aspartyl protease family protein
Carubv10009900m.g	0.725004	0.0237645	AT1G03210	0	Phenazine biosynthesis PhzC/PhzF protein
Carubv10010119m.g	-0.0823004	0.761408	AT1G03250	0	0
Carubv10009985m.g	-1.07604	7.15296e-09	AT1G03260	0	SNARE associated Golgi protein family
Carubv10008943m.g	-0.25654	0.471683	AT1G03270	0	CBS domain-containing protein with a domain of unknown function (DUF21)
Carubv10009067m.g	-0.489816	0.0179162	AT1G03280	0	Transcription factor TFIIE, alpha subunit
Carubv10008752m.g	2.39316	7.00126e-08	AT1G03290	0	0
Carubv10012522m.g	-0.470954	NA	AT1G03300	ATDUF1,DUF1	DOMAIN OF UNKNOWN FUNCTION 724 1
Carubv10012076m.g	0.665399	0.0156852	AT1G03310	ATISA2,BE2,DBE1,ISA2	debranching enzyme 1
Carubv10012047m.g	-1.16672	NA	AT1G03320	0	0
Carubv10010754m.g	0.449886	0.0373537	AT1G03330	0	Small nuclear ribonucleoprotein family protein
Carubv10011433m.g	3.11291	6.04408e-05	AT1G03340	0	0
Carubv10009649m.g	-0.0654394	0.845506	AT4G02930	0	GTP binding Elongation factor Tu family protein
Carubv10009113m.g	-0.437159	0.00602381	AT1G03350	0	BSD domain-containing protein
Carubv10009740m.g	1.00771	1.81304e-05	AT1G03360	ATRRP4,RRP4	ribosomal RNA processing 4
Carubv10008257m.g	0.120905	0.602679	AT1G03365	0	RING/U-box superfamily protein
Carubv10008175m.g	-0.912381	9.8164e-06	AT1G03370	0	C2 calcium/lipid-binding and GRAM domain containing protein
Carubv10008219m.g	-0.519481	0.0507158	AT1G03380	ATATG18G,ATG18G	homolog of yeast autophagy 18 (ATG18) G
Carubv10011653m.g	0.648635	NA	AT1G03390	0	HXXXD-type acyl-transferase family protein
Carubv10012607m.g	-0.894422	NA	AT1G03400	0	2-oxoglutarate (2OG) and Fe(II)-dependent oxygenase superfamily protein
Carubv10009046m.g	-0.660011	0.273303	AT1G03400	0	2-oxoglutarate (2OG) and Fe(II)-dependent oxygenase superfamily protein
Carubv10010558m.g	0.198591	0.438409	AT1G03430	AHP5	histidine-containing phosphotransfer factor 5
Carubv10009374m.g	0.566863	0.0969654	AT1G03440	0	Leucine-rich repeat (LRR) family protein
Carubv10012319m.g	5.47709	5.01321e-42	AT1G03445	BSU1	Serine/threonine protein phosphatase family protein
Carubv10009093m.g	0.1095	0.869104	AT1G03457	0	RNA-binding (RRM/RBD/RNP motifs) family protein
Carubv10009825m.g	-1.59774	1.20696e-06	AT1G03470	0	Kinase interacting (KIP1-like) family protein
Carubv10009383m.g	0.60104	0.00252387	AT1G03475	ATCPO-I,HEMF1,LIN2	Coproporphyrinogen III oxidase
Carubv10011348m.g	1.48604	0.318168	AT2G43220	0	Cysteine/Histidine-rich C1 domain family protein
Carubv10012206m.g	4.04489	5.68099e-05	AT1G03490	ANAC006,NAC006	NAC domain containing protein 6
Carubv10011372m.g	0.861389	0.0807474	AT1G03510	0	Tetratricopeptide repeat (TPR)-like superfamily protein
Carubv10009126m.g	-0.340245	0.199438	AT1G03520	0	Core-2/I-branching beta-1,6-N-acetylglucosaminyltransferase family protein
Carubv10008331m.g	0.928172	4.27426e-07	AT1G03530	ATNAF1,NAF1	nuclear assembly factor 1
Carubv10011274m.g	-0.421522	0.331083	AT1G03540	0	Pentatricopeptide repeat (PPR-like) superfamily protein
Carubv10012530m.g	0.206217	0.70449	AT1G03550	0	Secretory carrier membrane protein (SCAMP) family protein
Carubv10008524m.g	-0.452559	0.0265693	AT1G03560	0	Pentatricopeptide repeat (PPR-like) superfamily protein
Carubv10009068m.g	-2.45469	6.4116e-23	AT1G03590	0	Protein phosphatase 2C family protein
Carubv10010460m.g	0.891198	0.0046136	AT1G03600	PSB27	photosystem II family protein
Carubv10012401m.g	-1.0883	0.00111927	AT1G03610	0	Protein of unknown function (DUF789)
Carubv10010027m.g	-0.0280012	0.974154	AT1G03620	0	ELMO/CED-12 family protein
Carubv10009346m.g	1.08141	0.00135759	AT1G03630	POR C,PORC	protochlorophyllide oxidoreductase C
Carubv10010366m.g	1.18609	0.05864	AT1G03650	0	Acyl-CoA N-acyltransferases (NAT) superfamily protein
Carubv10010537m.g	-0.177862	0.596085	AT1G03660	0	Ankyrin-repeat containing protein
Carubv10010421m.g	0.536829	0.0164262	AT1G03680	ATHM1,ATM1,THM1,TRX-M1	thioredoxin M-type 1
Carubv10009418m.g	0.350069	0.185593	AT1G03687	0	DTW domain-containing protein
Carubv10012189m.g	-0.470954	NA	AT1G03700	0	Uncharacterised protein family (UPF0497)
Carubv10011650m.g	4.22333	4.4692e-10	AT1G03710	0	Cystatin/monellin superfamily protein
Carubv10010476m.g	-0.145065	0.809883	AT1G03730	0	0
Carubv10008411m.g	0.632052	0.0376444	AT1G03740	0	Protein kinase superfamily protein
Carubv10008286m.g	0.621648	0.00600543	AT1G03750	CHR9	switch 2
Carubv10011875m.g	0.48674	0.120613	AT1G03760	0	Prefoldin chaperone subunit family protein
Carubv10009016m.g	0.65278	0.0144489	AT1G03770	ATRING1B,RING1B	RING 1B
Carubv10008388m.g	-0.262842	0.36	AT1G03780	TPX2	targeting protein for XKLP2
Carubv10011207m.g	-0.194956	0.886501	AT1G03790	SOM	Zinc finger C-x8-C-x5-C-x3-H type family protein
Carubv10011371m.g	2.31621	3.75632e-11	AT1G03800	ATERF10,ERF10	ERF domain protein 10
Carubv10010570m.g	1.40263	8.63355e-06	AT1G03810	0	Nucleic acid-binding, OB-fold-like protein
Carubv10011357m.g	-1.86087	NA	AT1G03820	0	0
Carubv10008276m.g	0.0373207	0.855102	AT1G03830	0	guanylate-binding family protein
Carubv10008897m.g	0.97409	0.199519	AT1G03840	MGP	C2H2 and C2HC zinc fingers superfamily protein
Carubv10010567m.g	0.46192	0.684775	AT1G03850	0	Glutaredoxin family protein
Carubv10009925m.g	0.135357	0.568707	AT1G03860	ATPHB2,PHB2	prohibitin 2
Carubv10011002m.g	1.15435	0.462272	AT1G03870	FLA9	FASCICLIN-like arabinoogalactan 9
Carubv10011751m.g	-0.0927574	NA	AT1G03880	CRB,CRU2	cruciferin 2
Carubv10012169m.g	0.560047	0.157144	AT1G03890	0	RmlC-like cupins superfamily protein
Carubv10009732m.g	-1.16531	1.01756e-08	AT1G03900	ATNAP4,NAP4	non-intrinsic ABC protein 4
Carubv10009912m.g	0.0133644	0.963764	AT1G03905	0	P-loop containing nucleoside triphosphate hydrolases superfamily protein
Carubv10008511m.g	0.0571325	0.809807	AT1G03910	0	0
Carubv10008713m.g	-1.58016	0.13215	AT1G03920	0	Protein kinase family protein
Carubv10009684m.g	-0.397801	0.249458	AT1G03930	ADK1,CKL9ALPHA,CKL9BETA	dual specificity kinase 1
Carubv10011644m.g	0.558868	0.207147	AT1G03940	0	HXXXD-type acyl-transferase family protein
Carubv10010296m.g	2.00409	2.26171e-11	AT1G03950	VPS2.3	vacuolar protein sorting-associated protein 2.3
Carubv10009100m.g	-0.115101	0.684775	AT1G03960	0	Calcium-binding EF hand family protein
Carubv10011573m.g	-0.00951116	0.975595	AT1G03970	GBF4	G-box binding factor 4
Carubv10010963m.g	-0.349505	NA	AT1G03982	0	PAK-box/P21-Rho-binding family protein
Carubv10012453m.g	-0.768904	0.0799628	AT1G03990	0	Long-chain fatty alcohol dehydrogenase family protein
Carubv10011762m.g	-1.39072	4.92267e-06	AT1G04000	0	0
Carubv10008666m.g	-0.135083	0.651327	AT1G04010	ATPSAT1,PSAT1	phospholipid sterol acyl transferase 1
Carubv10008319m.g	0.741323	0.00483818	AT1G04020	ATBARD1,BARD1,ROW1	breast cancer associated RING 1
Carubv10011017m.g	0.212267	0.694628	AT1G04030	0	0
Carubv10010000m.g	0.0410965	0.922103	AT1G04040	0	HAD superfamily, subfamily IIIB acid phosphatase
Carubv10008474m.g	-0.027845	0.934979	AT1G04050	SDG13,SUVR1	homolog of SU(var)3-9 1
Carubv10012272m.g	0.679042	0.00100694	AT1G04070	ATTOM22-I,TOM22-I	translocase of outer membrane 22-I
Carubv10010956m.g	0.341008	0.0481085	AT1G04080	PRP39	Tetratricopeptide repeat (TPR)-like superfamily protein
Carubv10012003m.g	-1.20802	1.94744e-05	AT1G04090	0	Plant protein of unknown function (DUF946)
Carubv10010148m.g	-0.434002	0.121936	AT1G04100	IAA10	indoleacetic acid-induced protein 10
Carubv10012040m.g	-0.470954	NA	AT1G04110	SDD1	Subtilase family protein
Carubv10008087m.g	-0.557929	0.00242916	AT1G04120	ABCC5,ATABCC5,ATMRP5,MRP5	multidrug resistance-associated protein 5
Carubv10011408m.g	0.999367	0.000215922	AT1G04130	0	Tetratricopeptide repeat (TPR)-like superfamily protein
Carubv10011722m.g	-0.458419	0.0205399	AT1G04140	0	Transducin family protein / WD-40 repeat family protein
Carubv10012494m.g	-0.706624	0.0151555	AT1G04150	0	C2 calcium/lipid-binding plant phosphoribosyltransferase family protein
Carubv10008089m.g	-2.35447	2.01016e-20	AT1G04160	ATXIB,XI-8,XI-B,XIB	myosin XI B
Carubv10008849m.g	-0.435861	0.0108781	AT1G04170	EIF2 GAMMA	eukaryotic translation initiation factor 2 gamma subunit
Carubv10009248m.g	-0.90763	NA	AT1G04180	YUC9	YUCCA 9
Carubv10009715m.g	-0.0288111	0.897346	AT1G04190	0	Tetratricopeptide repeat (TPR)-like superfamily protein
Carubv10008423m.g	-1.40943	7.67536e-11	AT1G04200	0	0
Carubv10008166m.g	-0.599778	0.000590045	AT1G04210	0	Leucine-rich repeat protein kinase family protein
Carubv10008867m.g	-2.51003	1.446e-05	AT1G04220	KCS2	3-ketoacyl-CoA synthase 2
Carubv10010871m.g	0.141012	0.606258	AT1G04230	0	Protein of unknown function (DUF2361)
Carubv10010367m.g	1.02721	0.00435595	AT1G04240	IAA3,SHY2	AUX/IAA transcriptional regulator family protein
Carubv10010236m.g	-2.2167	0.000127966	AT1G04250	AXR3,IAA17	AUX/IAA transcriptional regulator family protein
Carubv10011583m.g	-0.277987	0.247662	AT1G04260	MPI7,MPIP7,PRA1.D	CAMV movement protein interacting protein 7
Carubv10010394m.g	0.165336	0.463295	AT1G04270	RPS15	cytosolic ribosomal protein S15
Carubv10012550m.g	-1.17517	0.000103536	AT1G04280	0	P-loop containing nucleoside triphosphate hydrolases superfamily protein
Carubv10010530m.g	-0.140141	0.597037	AT1G04290	0	Thioesterase superfamily protein
Carubv10012200m.g	-0.215695	0.255237	AT1G04300	0	TRAF-like superfamily protein
Carubv10008561m.g	-1.05134	1.07494e-05	AT1G04310	ERS2	ethylene response sensor 2
Carubv10010725m.g	-0.339224	0.817777	AT1G04330	0	0
Carubv10010342m.g	-0.953095	1.3526e-06	AT1G04340	0	HR-like lesion-inducing protein-related
Carubv10012007m.g	1.61802	0.32336	AT1G04360	0	RING/U-box superfamily protein
Carubv10011057m.g	-0.470954	NA	AT1G04370	ATERF14,ERF14	Ethylene-responsive element binding factor 14
Carubv10012463m.g	-2.64353	2.59217e-17	AT1G04380	0	2-oxoglutarate (2OG) and Fe(II)-dependent oxygenase superfamily protein
Carubv10012499m.g	0.371128	0.158607	AT1G04390	0	BTB/POZ domain-containing protein
Carubv10008610m.g	-0.198904	0.430748	AT1G04400	AT-PHH1,ATCRY2,CRY2,FHA,PHH1	cryptochrome 2
Carubv10009108m.g	0.780214	0.00180504	AT1G04420	0	NAD(P)-linked oxidoreductase superfamily protein
Carubv10011254m.g	-0.201761	0.615485	AT1G04430	0	S-adenosyl-L-methionine-dependent methyltransferases superfamily protein
Carubv10012017m.g	-0.990211	1.58592e-05	AT1G04440	CKL13	casein kinase like 13
Carubv10011479m.g	4.56894	2.73588e-24	AT1G04445	0	C2H2-like zinc finger protein
Carubv10012323m.g	2.40566	0.00668565	AT1G04450	RIC3	ROP-interactive CRIB motif-containing protein 3
Carubv10012095m.g	1.45781	0.0250333	AT2G33450	0	Ribosomal L28 family
Carubv10010690m.g	0.969064	0.17405	AT2G33450	0	Ribosomal L28 family
Carubv10012233m.g	-0.546859	0.389798	AT1G04470	0	Protein of unknown function (DUF810)
Carubv10012532m.g	0.52782	0.0195458	AT1G04480	0	Ribosomal protein L14p/L23e family protein
Carubv10011182m.g	-1.8454	7.45965e-06	AT1G04490	0	Protein of unknown function (DUF3527)
Carubv10009410m.g	-1.66871	0.224519	AT1G04500	0	CCT motif family protein
Carubv10008852m.g	0.204925	0.234369	AT1G04510	MAC3A	MOS4-associated complex 3A
Carubv10009823m.g	0.235236	0.418598	AT1G04520	PDLP2	plasmodesmata-located protein 2
Carubv10009880m.g	0.403854	0.23514	AT1G04530	0	Tetratricopeptide repeat (TPR)-like superfamily protein
Carubv10011922m.g	-3.40285	1.67227e-05	AT1G04540	0	Calcium-dependent lipid-binding (CaLB domain) family protein
Carubv10009764m.g	0.0829937	0.900992	AT1G04550	BDL,IAA12	AUX/IAA transcriptional regulator family protein
Carubv10010566m.g	2.09083	3.24052e-22	AT1G04555	0	0
Carubv10012389m.g	0.740587	NA	AT1G04560	0	AWPM-19-like family protein
Carubv10008801m.g	0.644821	0.0614702	AT1G04570	0	Major facilitator superfamily protein
Carubv10011163m.g	-3.59168	NA	AT1G04580	AAO4,AO4,ATAO-4,ATAO2	aldehyde oxidase 4
Carubv10009357m.g	0.129177	0.656128	AT1G04590	0	0
Carubv10012168m.g	1.12291	0.00135228	AT1G04600	ATXIA,XIA	myosin XI A
Carubv10011757m.g	2.08345	0.00772252	AT1G04610	YUC3	YUCCA 3
Carubv10011940m.g	0.472361	0.0810026	AT1G04620	0	coenzyme F420 hydrogenase family / dehydrogenase, beta subunit family
Carubv10010588m.g	-0.412385	0.0493487	AT1G04630	MEE4	GRIM-19 protein
Carubv10010559m.g	0.98384	0.00997384	AT1G04635	EMB1687	ribonuclease P family protein / Rpp14 family protein
Carubv10010053m.g	0.0210236	0.966203	AT1G04640	LIP2	lipoyltransferase 2
Carubv10011016m.g	1.46181	0.000245122	AT1G04645	0	Plant self-incompatibility protein S1 family
Carubv10008197m.g	0.924569	1.71592e-06	AT1G04650	0	0
Carubv10012332m.g	-1.75144	NA	AT1G04670	0	0
Carubv10009197m.g	-2.84477	3.90864e-07	AT1G04680	0	Pectin lyase-like superfamily protein
Carubv10009717m.g	-0.412667	0.0357857	AT1G04690	KAB1,KV-BETA1	potassium channel beta subunit 1
Carubv10011648m.g	-0.364737	0.626007	AT1G04700	0	PB1 domain-containing protein tyrosine kinase
Carubv10008506m.g	0.13685	0.440024	AT1G50920	0	Nucleolar GTP-binding protein
Carubv10009140m.g	0.0818841	0.824993	AT1G04710	KAT1,PKT4	peroxisomal 3-ketoacyl-CoA thiolase 4
Carubv10008278m.g	1.03925	8.70514e-06	AT1G04730	CTF18	P-loop containing nucleoside triphosphate hydrolases superfamily protein
Carubv10010251m.g	-0.34465	0.0627633	AT1G04750	AT VAMP7B,ATVAMP721,VAMP721,VAMP7B	vesicle-associated membrane protein 721
Carubv10012187m.g	-2.67667	2.37743e-08	AT1G04760	ATVAMP726,VAMP726	vesicle-associated membrane protein 726
Carubv10009848m.g	0.759514	0.0751708	AT1G04770	0	Tetratricopeptide repeat (TPR)-like superfamily protein
Carubv10008526m.g	-0.537439	0.00821374	AT1G04780	0	Ankyrin repeat family protein
Carubv10008582m.g	0.587352	0.00679224	AT1G04790	0	RING/U-box superfamily protein
Carubv10008193m.g	0.165185	0.357464	AT1G04810	0	26S proteasome regulatory complex, non-ATPase subcomplex, Rpn2/Psmd1 subunit
Carubv10009123m.g	0.222945	0.338992	AT1G04830	0	Ypt/Rab-GAP domain of gyp1p superfamily protein
Carubv10010811m.g	1.42586	0.40032	0	0	0
Carubv10008505m.g	0.654618	0.199145	AT1G04840	0	Tetratricopeptide repeat (TPR)-like superfamily protein
Carubv10011080m.g	0.396006	0.0959361	AT1G04850	0	ubiquitin-associated (UBA)/TS-N domain-containing protein
Carubv10008214m.g	-0.121788	0.586185	AT1G04860	ATUBP2,UBP2	ubiquitin-specific protease 2
Carubv10009430m.g	0.414841	0.0418809	AT1G04870	ATPRMT10,PRMT10	protein arginine methyltransferase 10
Carubv10010835m.g	5.19547	2.08492e-41	AT1G04880	0	HMG (high mobility group) box protein with ARID/BRIGHT DNA-binding domain
Carubv10011320m.g	-1.51969	NA	AT1G04890	0	Protein of unknown function, DUF593
Carubv10011212m.g	-0.225836	0.3396	AT1G04900	0	Protein of unknown function (DUF185)
Carubv10008864m.g	-0.644889	0.000802913	AT1G04910	0	O-fucosyltransferase family protein
Carubv10008160m.g	-0.390321	0.263131	AT1G04920	ATSPS3F,SPS3F	sucrose phosphate synthase 3F
Carubv10009801m.g	-0.74007	0.0216079	AT1G04930	0	hydroxyproline-rich glycoprotein family protein
Carubv10011153m.g	0.209228	0.301319	AT1G04945	0	HIT-type Zinc finger family protein
Carubv10008770m.g	0.316056	0.16282	AT1G04950	ATTAF6,TAF6,TAFII59	TATA BOX ASSOCIATED FACTOR II 59
Carubv10012006m.g	-0.649663	0.00359698	AT1G04960	0	Protein of unknown function (DUF1664)
Carubv10008924m.g	-0.468149	0.0163361	AT1G04970	0	lipid-binding serum glycoprotein family protein
Carubv10012209m.g	1.31108	1.47164e-09	AT1G04980	ATPDI10,ATPDIL2-2,PDI10,PDIL2-2	PDI-like 2-2
Carubv10012011m.g	-0.127559	0.675617	AT1G04985	0	0
Carubv10009335m.g	0.808395	6.41634e-05	AT1G04990	0	Zinc finger C-x8-C-x5-C-x3-H type family protein
Carubv10009961m.g	1.07462	3.88858e-05	AT1G05000	0	Phosphotyrosine protein phosphatases superfamily protein
Carubv10012579m.g	-1.47513	NA	AT1G43010	0	Pentatricopeptide repeat (PPR) superfamily protein
Carubv10009749m.g	-2.07819	0.000174415	AT1G05010	ACO4,EAT1,EFE	ethylene-forming enzyme
Carubv10008537m.g	-0.14105	0.87712	AT1G05020	0	ENTH/ANTH/VHS superfamily protein
Carubv10011812m.g	-2.78881	0.01671	AT1G05040	0	0
Carubv10009246m.g	-0.03013	0.90735	AT1G05055	ATGTF2H2,GTF2H2	general transcription factor II H2
Carubv10011171m.g	-0.470954	NA	AT5G40170	AtRLP54,RLP54	receptor like protein 54
Carubv10011495m.g	-0.470954	NA	AT5G40170	AtRLP54,RLP54	receptor like protein 54
Carubv10010084m.g	-0.425042	0.116839	AT1G05060	0	0
Carubv10009946m.g	1.18321	0.303798	AT2G32630	0	Pentatricopeptide repeat (PPR-like) superfamily protein
Carubv10010777m.g	-0.0935078	NA	AT1G05065	CLE20	CLAVATA3/ESR-RELATED 20
Carubv10010412m.g	1.26456	2.6018e-05	AT1G05070	0	Protein of unknown function (DUF1068)
Carubv10011452m.g	-0.471433	NA	AT1G05080	0	F-box/RNI-like/FBD-like domains-containing protein
Carubv10009896m.g	-0.882974	0.000178582	AT2G42460	0	TRAF-like family protein
Carubv10008492m.g	-0.832323	0.000561559	AT4G20720	0	dentin sialophosphoprotein-related
Carubv10009674m.g	-0.114514	0.896955	AT1G05100	MAPKKK18	mitogen-activated protein kinase kinase kinase 18
Carubv10008314m.g	0.267426	0.211698	AT1G05120	0	Helicase protein with RING/U-box domain
Carubv10011717m.g	1.31709	5.15032e-06	AT1G05140	0	Peptidase M50 family protein
Carubv10012243m.g	-0.841479	1.07455e-05	AT1G05150	0	Calcium-binding tetratricopeptide family protein
Carubv10008960m.g	-0.0238437	0.929185	AT1G05160	ATKAO1,CYP88A3,KAO1	cytochrome P450, family 88, subfamily A, polypeptide 3
Carubv10009858m.g	-2.85912	7.88831e-24	AT1G05170	0	Galactosyltransferase family protein
Carubv10008715m.g	-0.103281	0.625188	AT1G05180	AXR1	NAD(P)-binding Rossmann-fold superfamily protein
Carubv10010237m.g	1.1713	3.36609e-05	AT1G05190	emb2394	Ribosomal protein L6 family
Carubv10008205m.g	-0.0940458	NA	AT1G05200	ATGLR3.4,GLR3.4,GLUR3	glutamate receptor 3.4
Carubv10010747m.g	-0.154072	0.680452	AT1G05205	0	0
Carubv10010479m.g	-0.48429	0.100356	AT1G05210	0	Transmembrane protein 97, predicted
Carubv10008621m.g	-1.62741	6.6652e-15	AT1G05230	HDG2	homeodomain GLABROUS 2
Carubv10012652m.g	-0.907738	NA	AT1G05250	0	Peroxidase superfamily protein
Carubv10012469m.g	0.200069	NA	AT1G05250	0	Peroxidase superfamily protein
Carubv10010069m.g	-0.0829869	0.863258	AT1G07440	0	NAD(P)-binding Rossmann-fold superfamily protein
Carubv10011540m.g	1.2541	2.23657e-05	AT4G20480	0	Putative endonuclease or glycosyl hydrolase
Carubv10012082m.g	0.998158	0.00406882	AT4G20480	0	Putative endonuclease or glycosyl hydrolase
Carubv10009829m.g	1.51779	2.92706e-11	AT1G05260	RCI3,RCI3A	Peroxidase superfamily protein
Carubv10012564m.g	-1.38806	3.82827e-08	AT1G05270	0	TraB family protein
Carubv10012119m.g	-5.32987	1.40597e-11	AT1G05280	0	Protein of unknown function (DUF604)
Carubv10011948m.g	-0.470954	NA	AT1G05290	0	CCT motif family protein
Carubv10011853m.g	5.8823	1.00318e-81	AT1G05291	0	Protein of unknown function (DUF1218)
Carubv10009542m.g	-0.198254	0.63206	AT1G05300	ZIP5	zinc transporter 5 precursor
Carubv10011085m.g	0.523787	0.70525	AT1G05310	0	Pectin lyase-like superfamily protein
Carubv10011474m.g	-0.969363	1.10909e-08	AT1G05320	0	0
Carubv10012259m.g	-0.470954	NA	AT1G05330	0	0
Carubv10010816m.g	2.19201	0.000483006	AT2G32210	0	0
Carubv10010049m.g	0.387756	0.711846	AT3G18535	0	tubulin-tyrosine ligases
Carubv10011728m.g	-0.149955	0.835218	AT3G01440	PQL1,PQL2	PsbQ-like 1
Carubv10008192m.g	0.0216956	0.966918	AT3G01460	ATMBD9,MBD9	methyl-CPG-binding domain 9
Carubv10009195m.g	-0.548791	0.00525229	AT1G05350	0	NAD(P)-binding Rossmann-fold superfamily protein
Carubv10009268m.g	0.669294	0.00089654	AT1G05360	0	0
Carubv10009204m.g	-3.10081	3.78846e-21	AT1G05370	0	Sec14p-like phosphatidylinositol transfer family protein
Carubv10008137m.g	-0.750726	4.17004e-05	AT1G05380	0	Acyl-CoA N-acyltransferase with RING/FYVE/PHD-type zinc finger protein
Carubv10011658m.g	-0.470954	NA	AT1G05385	LPA19,Psb27-H1	photosystem II 11 kDa protein-related
Carubv10010861m.g	1.90625	6.88471e-05	AT1G05420	ATOFP12,OFP12	ovate family protein 12
Carubv10009042m.g	0.653928	0.000216092	AT1G05410	0	Protein of unknown function (DUF1423)
Carubv10010009m.g	-0.309404	0.188097	AT1G05430	0	0
Carubv10012616m.g	-1.40557	3.91451e-05	AT1G05440	0	C-8 sterol isomerases
Carubv10010889m.g	-4.09517	9.60993e-05	AT1G05450	0	Bifunctional inhibitor/lipid-transfer protein/seed storage 2S albumin superfamily protein
Carubv10008170m.g	0.376068	0.171036	AT1G05460	SDE3	P-loop containing nucleoside triphosphate hydrolases superfamily protein
Carubv10008606m.g	-1.13554	9.17342e-07	AT1G05470	CVP2	DNAse I-like superfamily protein
Carubv10008086m.g	-0.25597	0.22991	AT1G05490	chr31	chromatin remodeling 31
Carubv10011426m.g	-0.470954	NA	0	0	0
Carubv10010976m.g	-0.641232	0.000449734	AT1G05500	ATSYTE,NTMC2T2.1,NTMC2TYPE2.1,SYT5,SYTE	Calcium-dependent lipid-binding (CaLB domain) family protein
Carubv10010839m.g	0.373903	0.768002	AT1G05510	0	Protein of unknown function (DUF1264)
Carubv10011838m.g	-0.323577	0.125145	AT1G05520	0	Sec23/Sec24 protein transport family protein
Carubv10010859m.g	0.441397	NA	AT1G05560	UGT1,UGT75B1	UDP-glucosyltransferase 75B1
Carubv10011245m.g	1.33609	0.00066588	AT1G05540	0	Protein of unknown function (DUF295)
Carubv10012442m.g	0.353687	0.838504	AT1G05550	0	Protein of unknown function (DUF295)
Carubv10009073m.g	-1.88365	0.0507877	AT1G05560	UGT1,UGT75B1	UDP-glucosyltransferase 75B1
Carubv10012675m.g	-0.74711	0.00085741	AT1G05570	ATGSL06,ATGSL6,CALS1,GSL06,GSL6	callose synthase 1
Carubv10010762m.g	1.16764	NA	AT1G05575	0	0
Carubv10011656m.g	1.98817	0.182538	AT1G05577	0	Domain of unknown function (DUF966)
Carubv10011346m.g	-2.89745	2.01149e-10	AT1G05580	ATCHX23,CHX23	cation/H+ exchanger 23
Carubv10011603m.g	-0.801722	8.37482e-05	AT1G05590	ATHEX3,HEXO2	beta-hexosaminidase 2
Carubv10012229m.g	0.0208904	0.961604	AT1G05600	0	Tetratricopeptide repeat (TPR)-like superfamily protein
Carubv10009001m.g	-0.0940458	NA	AT1G05610	APS2	ADP-glucose pyrophosphorylase small subunit 2
Carubv10012044m.g	-0.470954	NA	AT2G24670	0	Domain of unknown function (DUF313)
Carubv10009769m.g	-0.631557	0.000476907	AT1G05620	URH2	uridine-ribohydrolase 2
Carubv10008138m.g	0.965726	4.41158e-05	AT1G05630	5PTASE13,AT5PTASE13	Endonuclease/exonuclease/phosphatase family protein
Carubv10008579m.g	-0.470954	NA	AT1G05640	0	Ankyrin repeat family protein
Carubv10011292m.g	0.590615	0.761408	AT1G05650	0	Pectin lyase-like superfamily protein
Carubv10012375m.g	-0.00787863	NA	AT1G05660	0	Pectin lyase-like superfamily protein
Carubv10008426m.g	0.10337	0.72093	AT1G05670	0	Pentatricopeptide repeat (PPR-like) superfamily protein
Carubv10011842m.g	0.11271	NA	AT1G05680	UGT74E2	Uridine diphosphate glycosyltransferase 74E2
Carubv10009096m.g	0.673877	0.654163	AT1G05680	UGT74E2	Uridine diphosphate glycosyltransferase 74E2
Carubv10009329m.g	-0.118527	0.796248	AT1G05690	BT3	BTB and TAZ domain protein 3
Carubv10011047m.g	0.329263	0.852917	AT1G05700	0	Leucine-rich repeat transmembrane protein kinase protein
Carubv10010563m.g	1.43292	0.00308167	AT1G05710	0	basic helix-loop-helix (bHLH) DNA-binding superfamily protein
Carubv10010380m.g	-0.848527	5.91769e-06	AT1G05720	0	selenoprotein family protein
Carubv10010564m.g	0.445034	0.258311	AT1G05730	0	Eukaryotic protein of unknown function (DUF842)
Carubv10011161m.g	-0.470954	NA	AT1G05750	CLB19,PDE247	Tetratricopeptide repeat (TPR)-like superfamily protein
Carubv10010372m.g	0.634805	0.261252	AT1G05760	RTM1	Mannose-binding lectin superfamily protein
Carubv10010613m.g	-0.701251	0.00887231	AT1G05785	0	Got1/Sft2-like vescicle transport protein family
Carubv10011376m.g	-0.0946736	0.776119	AT1G05790	0	lipase class 3 family protein
Carubv10010888m.g	-0.00610445	NA	AT1G05800	DGL	alpha/beta-Hydrolases superfamily protein
Carubv10009382m.g	1.4361	2.35335e-13	AT1G05805	0	basic helix-loop-helix (bHLH) DNA-binding superfamily protein
Carubv10010263m.g	-0.0112169	0.977888	AT1G05810	ARA,ARA-1,ATRAB11D,ATRABA5E,RABA5E	RAB GTPase homolog A5E
Carubv10008828m.g	0.757673	0.0166784	AT1G05820	ATSPPL5,SPPL5	SIGNAL PEPTIDE PEPTIDASE-LIKE 5
Carubv10008150m.g	-0.28462	0.232906	AT1G05830	ATX2,SDG30	trithorax-like protein 2
Carubv10011930m.g	-0.470954	NA	AT1G05835	0	PHD finger protein
Carubv10008865m.g	0.0728898	0.77816	AT1G05840	0	Eukaryotic aspartyl protease family protein
Carubv10009762m.g	-1.51472	2.17785e-20	AT1G05850	ATCTL1,CTL1,ELP,ELP1,ERH2,HOT2,POM1	Chitinase family protein
Carubv10009960m.g	0.11305	0.691114	AT1G05860	0	0
Carubv10010453m.g	-0.228146	0.470655	AT1G05870	0	Protein of unknown function (DUF1685)
Carubv10008969m.g	2.17354	0.151569	AT1G05880	ARI12,ATARI12	RING/U-box superfamily protein
Carubv10012456m.g	1.07248	1.46586e-11	AT1G05890	ARI5,ATARI5	RING/U-box superfamily protein
Carubv10011325m.g	0.346634	NA	AT1G05894	0	0
Carubv10012090m.g	-0.460941	0.122551	AT1G05900	ATNTH2,NTH2	endonuclease III 2
Carubv10008115m.g	0.0362314	0.869846	AT1G05910	0	cell division cycle protein 48-related / CDC48-related
Carubv10011639m.g	-0.470954	NA	AT1G05920	0	Domain of unknown function (DUF313)
Carubv10012589m.g	-0.0940458	NA	AT3G24850	0	Domain of unknown function (DUF313)
Carubv10008604m.g	0.323766	0.190695	AT1G05950	0	0
Carubv10008206m.g	-0.780432	9.92276e-05	AT1G05960	0	ARM repeat superfamily protein
Carubv10010117m.g	0.668647	0.0416486	AT1G05970	0	RNA-binding (RRM/RBD/RNP motifs) family protein
Carubv10010897m.g	-0.470954	NA	AT1G05990	RHS1	EF hand calcium-binding protein family
Carubv10010720m.g	0.236444	0.248714	AT1G06010	0	0
Carubv10012342m.g	1.02147	0.000549446	AT1G06030	0	pfkB-like carbohydrate kinase family protein
Carubv10010113m.g	-0.64539	0.00381639	AT1G06040	STO	B-box zinc finger family protein
Carubv10009838m.g	3.23605	7.01194e-17	AT1G06050	0	Protein of unknown function (DUF1336)
Carubv10009937m.g	-0.470954	NA	AT1G06060	0	LisH and RanBPM domains containing protein
Carubv10008993m.g	0.605842	0.198495	AT1G06070	0	Basic-leucine zipper (bZIP) transcription factor family protein
Carubv10012159m.g	1.10075	0.500897	AT1G06080	ADS1	delta 9 desaturase 1
Carubv10009877m.g	-2.78065	0.0140677	AT1G06090	0	Fatty acid desaturase family protein
Carubv10011680m.g	-0.093454	NA	AT1G06090	0	Fatty acid desaturase family protein
Carubv10012429m.g	0.533814	0.00690652	AT1G06110	SKIP16	SKP1/ASK-interacting protein 16
Carubv10011404m.g	-0.305984	0.175412	AT1G06130	GLX2-4	glyoxalase 2-4
Carubv10010975m.g	-0.471433	NA	AT1G06135	0	0
Carubv10011363m.g	-0.00610445	NA	AT1G06137	0	0
Carubv10011460m.g	0.767992	0.145708	AT1G06140	0	Pentatricopeptide repeat (PPR) superfamily protein
Carubv10011638m.g	0.229559	0.393941	AT1G06150	EMB1444	basic helix-loop-helix (bHLH) DNA-binding superfamily protein
Carubv10010105m.g	-0.471663	NA	AT1G06160	ORA59	octadecanoid-responsive Arabidopsis AP2/ERF 59
Carubv10009189m.g	0.986102	0.503683	AT1G06170	0	basic helix-loop-helix (bHLH) DNA-binding superfamily protein
Carubv10010717m.g	-0.058907	0.939034	AT1G06180	ATMYB13,ATMYBLFGN,MYB13	myb domain protein 13
Carubv10012682m.g	0.178494	0.750452	AT1G06180	ATMYB13,ATMYBLFGN,MYB13	myb domain protein 13
Carubv10011218m.g	1.26476	4.57002e-12	AT1G06190	0	Rho termination factor
Carubv10012464m.g	-0.518163	0.0158168	AT1G06200	0	Peptidase S24/S26A/S26B/S26C family protein
Carubv10009444m.g	-0.118185	0.690216	AT1G06210	0	ENTH/VHS/GAT family protein
Carubv10011516m.g	-0.470954	NA	AT1G06225	CLE3	CLAVATA3/ESR-RELATED 3
Carubv10008353m.g	-0.15562	0.408803	AT1G06230	GTE4	global transcription factor group E4
Carubv10011561m.g	-0.0613064	0.841972	AT1G06240	0	Protein of unknown function DUF455
Carubv10012192m.g	-0.134318	0.791757	AT1G06250	0	alpha/beta-Hydrolases superfamily protein
Carubv10011832m.g	0.817011	0.0113614	AT1G06260	0	Cysteine proteinases superfamily protein
Carubv10009635m.g	0.124521	0.732457	AT1G06270	0	Pentatricopeptide repeat (PPR) superfamily protein
Carubv10011711m.g	-0.0593993	NA	AT1G06280	LBD2	LOB domain-containing protein 2
Carubv10012245m.g	-1.56742	7.02902e-14	AT1G06290	ACX3,ATACX3	acyl-CoA oxidase 3
Carubv10010824m.g	-0.474582	0.555619	AT1G06290	ACX3,ATACX3	acyl-CoA oxidase 3
Carubv10011022m.g	0.15105	0.669974	AT1G06320	0	0
Carubv10012029m.g	-0.436898	NA	AT1G06330	0	Heavy metal transport/detoxification superfamily protein
Carubv10011095m.g	-0.471469	NA	AT1G06340	0	Plant Tudor-like protein
Carubv10011896m.g	1.80966	0.0279737	AT1G06360	0	Fatty acid desaturase family protein
Carubv10010791m.g	0.210141	0.772394	0	0	0
Carubv10011944m.g	0.165523	0.491118	AT1G06380	0	Ribosomal protein L1p/L10e family
Carubv10009298m.g	-0.422763	0.0364858	AT1G06390	ATGSK1,ATSK2-3,ATSK22,BIL2,GSK1,SK22	GSK3/SHAGGY-like protein kinase 1
Carubv10010250m.g	-0.470954	NA	AT1G06400	ARA-2,ARA2,ATRAB11E,ATRABA1A	Ras-related small GTP-binding family protein
Carubv10008292m.g	-0.25612	0.153452	AT1G06410	ATTPS7,ATTPSA,TPS7	trehalose-phosphatase/synthase 7
Carubv10010258m.g	0.633676	0.101978	AT1G06420	0	0
Carubv10011447m.g	0.446113	0.052205	AT1G06430	FTSH8	FTSH protease 8
Carubv10012333m.g	1.13579	0.00876273	AT1G06440	0	Ubiquitin carboxyl-terminal hydrolase family protein
Carubv10011336m.g	0.212547	0.3704	AT1G06450	0	Polynucleotidyl transferase, ribonuclease H-like superfamily protein
Carubv10012533m.g	1.09479	0.000500245	AT1G06460	ACD31.2,ACD32.1	alpha-crystallin domain 32.1
Carubv10009289m.g	-1.2644	4.98794e-10	AT1G06470	0	Nucleotide/sugar transporter family protein
Carubv10010766m.g	-1.2025	0.0212081	AT1G06475	0	0
Carubv10010938m.g	-0.321505	0.203066	AT1G06500	0	0
Carubv10011989m.g	-0.230244	0.547765	AT1G06510	0	0
Carubv10012249m.g	-2.71055	1.95736e-44	AT1G06520	ATGPAT1,GPAT1	glycerol-3-phosphate acyltransferase 1
Carubv10009757m.g	-0.0219133	0.932609	AT1G06530	0	Tropomyosin-related
Carubv10012251m.g	-0.0658823	0.951467	AT1G06540	0	0
Carubv10009384m.g	-0.405962	0.0621586	AT1G06550	0	ATP-dependent caseinolytic (Clp) protease/crotonase family protein
Carubv10011768m.g	0.56806	0.00684293	AT1G06560	0	NOL1/NOP2/sun family protein
Carubv10009131m.g	0.555192	0.0429968	AT1G06570	HPD,PDS1	phytoene desaturation 1
Carubv10008254m.g	0.582862	0.0079532	AT1G06590	0	0
Carubv10011473m.g	-1.76484	0.000735668	AT1G06620	0	2-oxoglutarate (2OG) and Fe(II)-dependent oxygenase superfamily protein
Carubv10009503m.g	-2.09036	0.00745828	AT1G06650	0	2-oxoglutarate (2OG) and Fe(II)-dependent oxygenase superfamily protein
Carubv10012295m.g	-1.14645	0.166482	AT1G06650	0	2-oxoglutarate (2OG) and Fe(II)-dependent oxygenase superfamily protein
Carubv10012445m.g	-0.212423	0.569829	AT1G06660	0	0
Carubv10011734m.g	0.106066	0.615464	AT1G06670	NIH	nuclear DEIH-boxhelicase
Carubv10011102m.g	1.75011	1.48303e-08	AT1G06680	OE23,OEE2,PSBP-1,PSII-P	photosystem II subunit P-1
Carubv10011808m.g	1.61191	1.29052e-05	AT1G06690	0	NAD(P)-linked oxidoreductase superfamily protein
Carubv10009518m.g	0.591696	0.00763708	AT1G06700	0	Protein kinase superfamily protein
Carubv10008194m.g	0.227326	0.440263	AT1G06710	0	Tetratricopeptide repeat (TPR)-like superfamily protein
Carubv10012207m.g	0.49739	0.00188267	AT1G06720	0	P-loop containing nucleoside triphosphate hydrolases superfamily protein
Carubv10008753m.g	-0.146946	0.521662	AT1G06730	0	pfkB-like carbohydrate kinase family protein
Carubv10008416m.g	0.481514	0.0892163	AT1G64260	0	MuDR family transposase
Carubv10011536m.g	0.313854	0.644331	AT1G06750	0	P-loop containing nucleoside triphosphate hydrolases superfamily protein
Carubv10009975m.g	0.135948	0.487837	AT2G30620	0	winged-helix DNA-binding transcription factor family protein
Carubv10009276m.g	0.358464	0.0622847	AT1G06770	DRIP1	DREB2A-interacting protein 1
Carubv10008650m.g	-0.406102	0.010234	AT1G06780	GAUT6	galacturonosyltransferase 6
Carubv10011131m.g	-0.478274	0.0879705	AT1G06790	0	RNA polymerase Rpb7 N-terminal domain-containing protein
Carubv10008898m.g	-1.51901	4.42698e-05	AT1G06800	PLA-I{gamma}1	alpha/beta-Hydrolases superfamily protein
Carubv10008639m.g	0.454217	0.0311454	AT1G06820	CCR2,CRTISO	carotenoid isomerase
Carubv10011626m.g	-0.470954	NA	AT1G06830	0	Glutaredoxin family protein
Carubv10008222m.g	0.0331162	0.928436	AT1G06840	0	Leucine-rich repeat protein kinase family protein
Carubv10009673m.g	-2.05869	2.95407e-20	AT1G06850	AtbZIP52,bZIP52	basic leucine-zipper 52
Carubv10009515m.g	-0.322083	0.0710803	AT1G06870	0	Peptidase S24/S26A/S26B/S26C family protein
Carubv10009574m.g	-0.976736	1.51883e-08	AT1G06890	0	nodulin MtN21 /EamA-like transporter family protein
Carubv10012025m.g	-0.411194	0.0251587	AT1G06900	0	Insulinase (Peptidase family M16) family protein
Carubv10011115m.g	0.374517	0.192864	AT1G06910	TRFL7	TRF-like 7
Carubv10011767m.g	0.288377	0.824993	AT1G06920	ATOFP4,OFP4	ovate family protein 4
Carubv10011424m.g	-0.471469	NA	AT1G06923	0	0
Carubv10011615m.g	-0.481597	NA	AT1G06930	0	0
Carubv10008186m.g	0.642283	0.000148374	AT1G06950	ATTIC110,TIC110	translocon at the inner envelope membrane of chloroplasts 110
Carubv10010209m.g	0.622871	0.0780489	AT1G06960	0	RNA-binding (RRM/RBD/RNP motifs) family protein
Carubv10012328m.g	1.29035	0.156067	AT1G06980	0	0
Carubv10012021m.g	1.47431	0.199964	AT1G06990	0	GDSL-like Lipase/Acylhydrolase superfamily protein
Carubv10011870m.g	-0.366702	0.278023	AT1G07000	ATEXO70B2,EXO70B2	exocyst subunit exo70 family protein B2
Carubv10011512m.g	4.61278	4.50852e-06	AT2G30210	LAC3	laccase 3
Carubv10012402m.g	1.17756	1.11814e-08	AT1G07010	0	Calcineurin-like metallo-phosphoesterase superfamily protein
Carubv10012654m.g	-0.138348	0.711968	AT1G07020	0	0
Carubv10011609m.g	-0.0802865	0.791185	AT1G07030	0	Mitochondrial substrate carrier family protein
Carubv10012278m.g	-1.26339	4.70762e-06	AT1G07040	0	0
Carubv10011200m.g	2.15381	0.102062	AT1G07050	0	CCT motif family protein
Carubv10010114m.g	1.03769	0.103516	AT1G07060	0	0
Carubv10010028m.g	-1.91746	4.85204e-16	AT1G07080	0	Thioredoxin superfamily protein
Carubv10010340m.g	-1.3901	2.2749e-12	AT1G07090	LSH6	Protein of unknown function (DUF640)
Carubv10012057m.g	-0.681544	0.00337086	AT1G07110	ATF2KP,F2KP,FKFBP	fructose-2,6-bisphosphatase
Carubv10012267m.g	1.89677	0.00760397	AT1G07120	0	0
Carubv10010524m.g	1.07577	0.00326744	AT1G07130	ATSTN1,STN1	Nucleic acid-binding, OB-fold-like protein
Carubv10011181m.g	2.37811	0.0245334	AT1G07135	0	glycine-rich protein
Carubv10010221m.g	-0.347333	0.0499052	AT1G07140	SIRANBP	Pleckstrin homology (PH) domain superfamily protein
Carubv10008850m.g	0.710679	0.304519	AT1G07150	MAPKKK13	mitogen-activated protein kinase kinase kinase 13
Carubv10009317m.g	1.70026	0.206269	AT1G07160	0	Protein phosphatase 2C family protein
Carubv10010703m.g	1.14534	1.13688e-06	AT1G07170	0	PHF5-like protein
Carubv10012404m.g	-2.61446	0.0899407	AT1G07175	0	0
Carubv10008908m.g	1.28513	0.123436	AT1G07180	ATNDI1,NDA1	alternative NAD(P)H dehydrogenase 1
Carubv10008201m.g	-0.470954	NA	AT1G07200	0	Double Clp-N motif-containing P-loop nucleoside triphosphate hydrolases superfamily protein
Carubv10009750m.g	0.0463179	0.855953	AT1G07210	0	Ribosomal protein S18
Carubv10008891m.g	0.864746	0.00359638	AT1G07220	0	Arabidopsis thaliana protein of unknown function (DUF821)
Carubv10008826m.g	-1.05127	3.14202e-07	AT1G07230	NPC1	non-specific phospholipase C1
Carubv10009037m.g	2.51434	0.0385005	AT1G07240	UGT71C5	UDP-glucosyl transferase 71C5
Carubv10009025m.g	0.163033	0.527918	AT1G07250	UGT71C4	UDP-glucosyl transferase 71C4
Carubv10009021m.g	0.940891	0.00217281	AT1G07260	UGT71C3	UDP-glucosyl transferase 71C3
Carubv10008935m.g	1.82154	1.8122e-05	AT1G07270	0	Cell division control, Cdc6
Carubv10008793m.g	-0.834714	0.00329314	AT1G07280	0	Tetratricopeptide repeat (TPR)-like superfamily protein
Carubv10009481m.g	-0.750217	0.0108926	AT1G07290	GONST2	golgi nucleotide sugar transporter 2
Carubv10011953m.g	-0.470954	NA	AT1G07300	0	josephin protein-related
Carubv10009572m.g	1.47861	NA	AT1G07310	0	Calcium-dependent lipid-binding (CaLB domain) family protein
Carubv10009944m.g	-0.475967	0.49927	AT1G07320	RPL4	ribosomal protein L4
Carubv10011307m.g	0.351101	0.777182	AT1G07330	0	0
Carubv10008940m.g	-0.471991	NA	AT1G07340	ATSTP2,STP2	sugar transporter 2
Carubv10009665m.g	-0.379594	0.0341974	AT1G07350	0	RNA-binding (RRM/RBD/RNP motifs) family protein
Carubv10008917m.g	-0.11758	0.584511	AT1G07360	0	CCCH-type zinc fingerfamily protein with RNA-binding domain
Carubv10012643m.g	-0.803477	NA	AT1G07370	ATPCNA1,PCNA1	proliferating cellular nuclear antigen 1
Carubv10008356m.g	-0.603666	0.0218238	AT1G07380	0	Neutral/alkaline non-lysosomal ceramidase
Carubv10008151m.g	0.186058	0.617628	AT1G07390	AtRLP1,RLP1	receptor like protein 1
Carubv10010535m.g	-1.45412	0.000110411	AT1G07400	0	HSP20-like chaperones superfamily protein
Carubv10010276m.g	-0.982106	6.32858e-09	AT1G07410	ATRAB-A2B,ATRABA2B,RAB-A2B,RABA2b	RAB GTPase homolog A2B
Carubv10009860m.g	0.0231651	0.935969	AT1G07420	ATSMO2,SMO2-1	sterol 4-alpha-methyl-oxidase 2-1
Carubv10009150m.g	-0.972756	0.246018	AT1G07430	HAI2	highly ABA-induced PP2C gene 2
Carubv10010021m.g	0.403292	0.114851	AT1G07440	0	NAD(P)-binding Rossmann-fold superfamily protein
Carubv10010864m.g	0.511455	0.781108	AT1G07460	0	Concanavalin A-like lectin family protein
Carubv10009468m.g	0.24743	0.301501	AT1G07480	0	Transcription factor IIA, alpha/beta subunit
Carubv10012574m.g	-1.10647	0.471283	AT1G07473	0	0
Carubv10011633m.g	-1.73461	NA	AT1G07476	0	0
Carubv10009471m.g	0.75032	1.99855e-05	AT1G07480	0	Transcription factor IIA, alpha/beta subunit
Carubv10011490m.g	-0.471732	NA	AT1G07490	DVL9,RTFL3	ROTUNDIFOLIA like 3
Carubv10011564m.g	-0.862274	NA	AT5G02220	0	0
Carubv10008328m.g	-0.766238	4.49725e-06	AT1G07510	ftsh10	FTSH protease 10
Carubv10010943m.g	0.553415	0.270252	AT1G07520	0	GRAS family transcription factor
Carubv10008391m.g	-0.232118	0.383057	AT1G07530	ATGRAS2,GRAS2,SCL14	SCARECROW-like 14
Carubv10011259m.g	1.01984	0.349288	AT1G07540	TRFL2	TRF-like 2
Carubv10011886m.g	-0.893811	NA	AT2G14510	0	Leucine-rich repeat protein kinase family protein
Carubv10011370m.g	1.08646	NA	AT2G14510	0	Leucine-rich repeat protein kinase family protein
Carubv10011533m.g	0.560042	NA	AT1G07560	0	Leucine-rich repeat protein kinase family protein
Carubv10009302m.g	-0.461991	0.1101	AT1G07570	APK1,APK1A	Protein kinase superfamily protein
Carubv10008810m.g	1.33748	6.21813e-07	AT1G07590	0	Tetratricopeptide repeat (TPR)-like superfamily protein
Carubv10011048m.g	-1.493	0.00102561	AT1G07610	MT1C	metallothionein 1C
Carubv10008970m.g	1.00637	3.51186e-06	AT1G07615	0	GTP-binding protein Obg/CgtA
Carubv10008702m.g	-1.35114	0.225991	AT1G07620	ATOBGM	GTP-binding protein Obg/CgtA
Carubv10008517m.g	-1.28221	9.12847e-09	AT1G07630	PLL5	pol-like 5
Carubv10011378m.g	-0.13235	0.730886	AT1G07640	OBP2	Dof-type zinc finger DNA-binding family protein
Carubv10008366m.g	0.914458	0.0144494	AT1G07650	0	Leucine-rich repeat transmembrane protein kinase
Carubv10012292m.g	-0.992398	NA	AT1G07645	ATDSI-1VOC,DSI-1VOC	dessication-induced 1VOC superfamily protein
Carubv10010719m.g	0.562623	0.0166304	AT1G07820	0	Histone superfamily protein
Carubv10010132m.g	-0.266369	0.236498	AT2G27260	0	Late embryogenesis abundant (LEA) hydroxyproline-rich glycoprotein family
Carubv10008142m.g	-0.136007	0.565301	AT1G07670	ATECA4,ECA4	endomembrane-type CA-ATPase 4
Carubv10012490m.g	7.21432	5.69275e-28	AT1G07680	0	0
Carubv10010444m.g	7.80004	9.33639e-77	AT1G07690	0	0
Carubv10010324m.g	0.89773	0.000226663	AT1G07700	0	Thioredoxin superfamily protein
Carubv10008611m.g	0.0143014	0.954381	AT1G07705	0	NOT2 / NOT3 / NOT5 family
Carubv10012363m.g	1.29735	0.148139	AT1G07710	0	Ankyrin repeat family protein
Carubv10011152m.g	-1.33855	1.84122e-07	AT1G07720	KCS3	3-ketoacyl-CoA synthase 3
Carubv10011844m.g	-0.876969	0.0133953	AT1G07725	ATEXO70H6,EXO70H6	exocyst subunit exo70 family protein H6
Carubv10009852m.g	2.15233	1.91705e-16	AT1G07745	ATRAD51D,RAD51D,SSN1	homolog of RAD51 D
Carubv10011199m.g	1.33479	0.000101909	AT1G43666	0	Bifunctional inhibitor/lipid-transfer protein/seed storage 2S albumin superfamily protein
Carubv10011969m.g	5.29965	3.62266e-49	AT1G07747	0	Bifunctional inhibitor/lipid-transfer protein/seed storage 2S albumin superfamily protein
Carubv10009562m.g	-0.803148	6.54044e-05	AT1G07750	0	RmlC-like cupins superfamily protein
Carubv10010804m.g	-2.19186	9.87044e-14	0	0	0
Carubv10010626m.g	0.997447	4.83515e-06	AT1G07770	RPS15A	ribosomal protein S15A
Carubv10010582m.g	-0.0598936	0.809769	AT1G07790	HTB1	Histone superfamily protein
Carubv10010697m.g	-3.469	4.35094e-31	AT1G07795	0	0
Carubv10010716m.g	-0.473375	0.033485	AT1G07820	0	Histone superfamily protein
Carubv10009657m.g	0.179738	0.393557	AT1G07840	0	Sas10/Utp3/C1D family
Carubv10011500m.g	2.80813	0.0305927	AT1G07850	0	Protein of unknown function (DUF604)
Carubv10008692m.g	0.699333	0.000400008	AT1G07870	0	Protein kinase superfamily protein
Carubv10010840m.g	0.421044	0.566371	AT1G07880	ATMPK13	Protein kinase superfamily protein
Carubv10009719m.g	0.0983112	0.721355	AT1G07890	APX1,ATAPX01,ATAPX1,CS1,MEE6	ascorbate peroxidase 1
Carubv10010390m.g	0.276061	NA	AT1G07900	LBD1	LOB domain-containing protein 1
Carubv10008126m.g	0.0295377	0.881425	AT1G07910	ATRNL,RNL	RNAligase
Carubv10009637m.g	-0.0774481	0.76566	AT1G07930	0	GTP binding Elongation factor Tu family protein
Carubv10009294m.g	-0.305417	0.116249	AT1G07940	0	GTP binding Elongation factor Tu family protein
Carubv10011249m.g	-0.108742	0.616065	AT1G07940	0	GTP binding Elongation factor Tu family protein
Carubv10010175m.g	0.106046	0.928436	AT5G41270	0	0
Carubv10010522m.g	0.586249	0.0611663	AT1G07950	MED22B	Surfeit locus protein 5 subunit 22 of Mediator complex
Carubv10010571m.g	1.47425	3.13944e-07	AT1G07960	ATPDIL5-1,PDIL5-1	PDI-like 5-1
Carubv10008478m.g	0.275371	0.240706	AT1G07970	0	0
Carubv10009702m.g	-0.387727	0.0801061	AT1G07985	0	Expressed protein
Carubv10011058m.g	0.0463575	0.816239	AT1G07990	0	SIT4 phosphatase-associated family protein
Carubv10009871m.g	0.528633	0.0158632	AT1G08010	GATA11	GATA transcription factor 11
Carubv10011453m.g	0.409641	0.0648182	AT1G08030	TPST	tyrosylprotein sulfotransferase
Carubv10012236m.g	2.41781	8.79263e-08	AT1G08035	0	0
Carubv10010995m.g	0.818403	0.00389556	AT1G08040	0	Protein of unknown function (DUF707)
Carubv10008075m.g	-0.539791	0.00269985	AT1G08060	MOM,MOM1	ATP-dependent helicase family protein
Carubv10012428m.g	-0.470954	NA	AT1G08065	ACA5,ATACA5	alpha carbonic anhydrase 5
Carubv10008399m.g	0.443274	0.487133	AT1G08070	OTP82	Tetratricopeptide repeat (TPR)-like superfamily protein
Carubv10012300m.g	-0.789283	0.509689	AT1G08080	ACA7,ATACA7	alpha carbonic anhydrase 7
Carubv10008824m.g	-0.470954	NA	AT1G08090	ACH1,ATNRT2.1,ATNRT2:1,LIN1,NRT2,NRT2.1,NRT2:1,NRT2;1AT	nitrate transporter 2:1
Carubv10011028m.g	-0.470954	NA	AT1G08090	ACH1,ATNRT2.1,ATNRT2:1,LIN1,NRT2,NRT2.1,NRT2:1,NRT2;1AT	nitrate transporter 2:1
Carubv10010424m.g	0.669381	0.0229542	AT1G08110	0	lactoylglutathione lyase family protein / glyoxalase I family protein
Carubv10009772m.g	0.896923	4.96078e-05	AT1G08125	0	S-adenosyl-L-methionine-dependent methyltransferases superfamily protein
Carubv10008341m.g	-0.291778	0.182932	AT1G08130	ATLIG1,LIG1	DNA ligase 1
Carubv10012226m.g	1.63927	0.249839	AT1G08135	ATCHX6B,CHX6B	cation/H+ exchanger 6B
Carubv10012247m.g	-1.79383	0.00967721	AT1G08140	ATCHX6A,CHX6A	cation/H+ exchanger 6A
Carubv10012128m.g	-2.6717	0.0182638	AT1G08150	ATCHX5,CHX5	Cation/hydrogen exchanger family protein
Carubv10010243m.g	0.470922	NA	AT1G08160	0	Late embryogenesis abundant (LEA) hydroxyproline-rich glycoprotein family
Carubv10011530m.g	-1.87983	3.24656e-08	AT1G08170	0	Histone superfamily protein
Carubv10010984m.g	0.765951	0.165847	AT1G08180	0	0
Carubv10011806m.g	0.182969	0.435659	AT1G08190	ATVAM2,ATVPS41,VAM2,VPS41,ZIP2	vacuolar protein sorting 41
Carubv10009400m.g	-0.581135	0.000821771	AT1G08200	AXS2	UDP-D-apiose/UDP-D-xylose synthase 2
Carubv10008955m.g	0.147259	0.66342	AT1G08210	0	Eukaryotic aspartyl protease family protein
Carubv10009984m.g	0.149846	0.629063	AT1G08220	0	0
Carubv10009101m.g	-0.140204	0.879217	AT1G08230	ATGAT1,GAT1	Transmembrane amino acid transporter family protein
Carubv10012370m.g	-0.00740241	0.982711	AT1G08250	ADT6	arogenate dehydratase 6
Carubv10008067m.g	-0.276833	0.116865	AT1G08260	ABO4,EMB142,EMB2284,EMB529,ESD7,POL2A,TIL1	DNA polymerase epsilon catalytic subunit
Carubv10009362m.g	-4.01647	1.48272e-35	AT1G08280	0	Glycosyltransferase family 29 (sialyltransferase) family protein
Carubv10009617m.g	0.365792	0.619333	AT1G08290	WIP3	WIP domain protein 3
Carubv10011774m.g	0.1894	0.888435	AT1G08300	NVL	no vein-like
Carubv10010878m.g	-0.679177	0.629139	AT1G08310	0	alpha/beta-Hydrolases superfamily protein
Carubv10011052m.g	-0.3745	0.256146	AT1G08315	0	ARM repeat superfamily protein
Carubv10011576m.g	-2.48563	3.91537e-07	AT1G08320	bZIP21,TGA9	bZIP transcription factor family protein
Carubv10009491m.g	-1.94854	0.11321	AT1G08340	0	Rho GTPase activating protein with PAK-box/P21-Rho-binding domain
Carubv10008667m.g	0.670005	0.00670526	AT1G08350	0	Endomembrane protein 70 protein family
Carubv10010278m.g	0.359626	0.0628715	AT1G08360	0	Ribosomal protein L1p/L10e family
Carubv10009516m.g	-0.59109	0.00162121	AT1G08370	ATDCP1,DCP1	decapping 1
Carubv10010597m.g	0.653492	0.0419396	AT1G08380	PSAO	photosystem I subunit O
Carubv10010612m.g	-0.470954	NA	AT1G08390	0	0
Carubv10008321m.g	1.5668	0.0838034	AT1G08400	0	RINT-1 / TIP-1 family
Carubv10012258m.g	0.271051	0.101394	AT1G08410	0	P-loop containing nucleoside triphosphate hydrolases superfamily protein
Carubv10008182m.g	-0.0855275	0.719862	AT1G08420	BSL2	BRI1 suppressor 1 (BSU1)-like 2
Carubv10012224m.g	2.25186	0.119839	AT1G08430	ALMT1,ATALMT1	aluminum-activated malate transporter 1
Carubv10011859m.g	-0.0940458	NA	AT1G08440	0	Aluminium activated malate transporter family protein
Carubv10009219m.g	0.210839	0.46299	AT1G08450	AtCRT3,CRT3,EBS2,PSL1	calreticulin 3
Carubv10009385m.g	-0.366114	0.16439	AT1G08460	ATHDA8,HDA08,HDA8	histone deacetylase 8
Carubv10010384m.g	1.6125	0.0460792	AT1G08465	YAB2	Plant-specific transcription factor YABBY family protein
Carubv10011803m.g	-0.470954	NA	0	0	0
Carubv10009397m.g	-0.470954	NA	AT1G08470	SSL3	strictosidine synthase-like 3
Carubv10010583m.g	-0.416057	0.100287	AT1G08480	0	0
Carubv10012604m.g	0.352199	0.20004	AT1G08490	ATCPNIFS,ATNFS2,ATSUFS,CPNIFS,SUFS	chloroplastic NIFS-like cysteine desulfurase
Carubv10010188m.g	-7.37009	1.77666e-20	AT1G08500	AtENODL18,ENODL18	early nodulin-like protein 18
Carubv10009296m.g	-1.3491	7.09769e-15	AT1G08510	FATB	fatty acyl-ACP thioesterases B
Carubv10008387m.g	0.915675	0.00024819	AT1G08520	ALB-1V,ALB1,CHLD,PDE166,V157	ALBINA 1
Carubv10010041m.g	0.490872	0.022357	AT1G08530	0	0
Carubv10008711m.g	0.752567	0.000624744	AT1G08540	ABC1,ATSIG1,ATSIG2,SIG1,SIG2,SIGA,SIGB	RNApolymerase sigma subunit 2
Carubv10009082m.g	1.50694	3.82618e-07	AT1G08550	AVDE1,NPQ1	non-photochemical quenching 1
Carubv10012277m.g	-0.470954	NA	AT1G08560	ATSYP111,KN,SYP111	syntaxin of plants 111
Carubv10009966m.g	-0.462946	0.0801318	AT1G08570	ACHT4	atypical CYS HIS rich thioredoxin 4
Carubv10010661m.g	-0.420229	0.066103	AT1G08580	0	0
Carubv10008171m.g	-0.756385	0.00106221	AT1G08590	0	Leucine-rich receptor-like protein kinase family protein
Carubv10011116m.g	0.906559	1.61688e-07	AT1G08600	ATRX,CHR20	P-loop containing nucleoside triphosphate hydrolases superfamily protein
Carubv10012539m.g	1.28999	0.000621201	AT1G08610	0	Pentatricopeptide repeat (PPR) superfamily protein
Carubv10008112m.g	-0.408304	0.0120738	AT1G08620	PKDM7D	Transcription factor jumonji (jmj) family protein / zinc finger (C5HC2 type) family protein
Carubv10009546m.g	-1.365	1.00536e-05	AT1G08630	THA1	threonine aldolase 1
Carubv10009875m.g	-0.120542	0.636187	AT1G08640	CJD1	Chloroplast J-like domain 1
Carubv10009932m.g	-1.17407	8.57419e-05	AT1G08650	ATPPCK1,PPCK1	phosphoenolpyruvate carboxylase kinase 1
Carubv10009038m.g	-0.999811	6.32984e-08	AT1G08660	MGP2	MALE GAMETOPHYTE DEFECTIVE 2
Carubv10011520m.g	-0.470954	NA	AT1G08670	0	ENTH/VHS family protein
Carubv10008548m.g	-0.446928	0.0296065	AT1G08680	AGD14,ZIGA4	ARF GAP-like zinc finger-containing protein ZIGA4
Carubv10009057m.g	0.344916	0.232762	AT1G08700	PS1	Presenilin-1
Carubv10009806m.g	0.539039	0.211524	AT1G08710	0	F-box family protein
Carubv10008230m.g	-0.335929	0.199601	AT1G08720	ATEDR1,EDR1	Protein kinase superfamily protein
Carubv10011892m.g	1.21056	0.0251587	AT1G08730	ATXIC,XIC	Myosin family protein with Dil domain
Carubv10009426m.g	-0.73135	0.00097662	AT1G08750	0	Peptidase C13 family
Carubv10010792m.g	-0.474932	0.823638	0	0	0
Carubv10008392m.g	-0.927508	3.60736e-05	AT1G08760	0	Plant protein of unknown function (DUF936)
Carubv10010304m.g	-0.495107	0.0235627	AT1G08770	PRA1.E	prenylated RAB acceptor 1.E
Carubv10010510m.g	-0.0946991	0.755907	AT1G08780	AIP3,PFD4	ABI3-interacting protein 3
Carubv10011157m.g	0.547719	NA	AT1G08790	0	Protein of unknown function (DUF1685)
Carubv10008154m.g	-0.363002	0.0736023	AT1G08800	0	Protein of unknown function, DUF593
Carubv10009957m.g	-1.03354	4.32943e-05	AT1G08810	AtMYB60,MYB60	myb domain protein 60
Carubv10009369m.g	0.738938	0.00113998	AT1G08820	VAP27-2	vamp/synaptobrevin-associated protein 27-2
Carubv10012032m.g	-0.0940458	NA	AT1G08695	SCRL3	SCR-like 3
Carubv10010551m.g	-0.203217	0.48885	AT1G08830	CSD1	copper/zinc superoxide dismutase 1
Carubv10011024m.g	1.15249	1.65261e-08	AT1G08840	emb2411	DNA replication helicase, putative
Carubv10010378m.g	0.0660059	0.799725	AT1G08845	0	Ribosomal L18p/L5e family protein
Carubv10008668m.g	0.397161	0.0370906	AT1G08860	BON3	Calcium-dependent phospholipid-binding Copine family protein
Carubv10010499m.g	0.663105	0.00116157	AT1G08880	G-H2AX,GAMMA-H2AX,H2AXA,HTA5	Histone superfamily protein
Carubv10012279m.g	-0.188378	0.900992	AT1G08890	0	Major facilitator superfamily protein
Carubv10008291m.g	-0.0618448	0.855776	AT1G08910	EMB3001	zinc ion binding;zinc ion binding
Carubv10010993m.g	-0.778705	0.211686	AT1G08920	ESL1	ERD (early response to dehydration) six-like 1
Carubv10009965m.g	0.765063	0.145501	AT1G08940	0	Phosphoglycerate mutase family protein
Carubv10008760m.g	-1.28152	2.08792e-07	AT1G08960	ATCAX11,CAX11	cation exchanger 11
Carubv10010196m.g	-0.283801	0.284693	AT1G08970	HAP5C,NF-YC9	nuclear factor Y, subunit C9
Carubv10009223m.g	-1.13884	0.0158276	AT1G08980	AMI1,ATAMI1,ATTOC64-I,TOC64-I	amidase 1
Carubv10012670m.g	1.02424	0.255413	AT1G08980	AMI1,ATAMI1,ATTOC64-I,TOC64-I	amidase 1
Carubv10011725m.g	-0.852839	0.00478019	AT1G08990	PGSIP5	plant glycogenin-like starch initiation protein 5
Carubv10011475m.g	0.340569	0.132927	AT1G09000	ANP1,MAPKKK1,NP1	NPK1-related protein kinase 1
Carubv10008228m.g	1.04843	1.65006e-08	AT1G09010	0	glycoside hydrolase family 2 protein
Carubv10008946m.g	-0.536257	0.000864982	AT1G09020	ATSNF4,SNF4	homolog of yeast sucrose nonfermenting 4
Carubv10011185m.g	-0.0593993	NA	AT1G09030	NF-YB4	nuclear factor Y, subunit B4
Carubv10012573m.g	0.751095	0.0001892	AT1G09040	0	0
Carubv10011895m.g	0.0303795	0.885308	AT1G09060	0	Zinc finger, RING-type;Transcription factor jumonji/aspartyl beta-hydroxylase
Carubv10009766m.g	0.988165	1.28964e-06	AT1G09070	(AT)SRC2,SRC2	soybean gene regulated by cold-2
Carubv10008520m.g	3.12433	6.12882e-06	AT1G09080	BIP3	Heat shock protein 70 (Hsp 70) family protein
Carubv10008289m.g	-0.398029	NA	AT1G09090	ATRBOHB,ATRBOHB-BETA,RBOHB	respiratory burst oxidase homolog B
Carubv10011543m.g	0.397347	0.0272917	AT1G09130	0	ATP-dependent caseinolytic (Clp) protease/crotonase family protein
Carubv10009803m.g	-0.590353	0.00785426	AT1G09140	ATSRP30,ATSRP30.1,ATSRP30.2	SERINE-ARGININE PROTEIN 30
Carubv10010413m.g	0.258758	0.254521	AT1G09150	0	pseudouridine synthase and archaeosine transglycosylase (PUA) domain-containing protein
Carubv10009939m.g	0.349735	NA	AT1G09155	AtPP2-B15,PP2-B15	phloem protein 2-B15
Carubv10009213m.g	-0.272615	0.207025	AT1G09160	0	Protein phosphatase 2C family protein
Carubv10011730m.g	-2.04821	0.193081	AT1G09170	0	P-loop nucleoside triphosphate hydrolases superfamily protein with CH (Calponin Homology) domain
Carubv10010383m.g	0.522436	0.0229618	AT1G56330	ATSAR1,ATSAR1B,ATSARA1B,SAR1,SAR1B	secretion-associated RAS 1B
Carubv10012008m.g	0.494887	0.22132	AT1G09190	0	Tetratricopeptide repeat (TPR)-like superfamily protein
Carubv10011869m.g	-0.58639	0.00362971	AT1G09195	0	0
Carubv10011755m.g	0.260892	0.335807	AT5G10400	0	Histone superfamily protein
Carubv10012218m.g	0.0788062	0.724563	AT1G09210	AtCRT1b,CRT1b	calreticulin 1b
Carubv10011053m.g	0.666083	0.00131877	AT1G09210	AtCRT1b,CRT1b	calreticulin 1b
Carubv10011104m.g	-0.0940458	NA	AT1G09220	0	Pentatricopeptide repeat (PPR) superfamily protein
Carubv10010165m.g	1.51509	5.56886e-05	AT1G08860	BON3	Calcium-dependent phospholipid-binding Copine family protein
Carubv10012313m.g	0.744423	0.12256	AT1G09220	0	Pentatricopeptide repeat (PPR) superfamily protein
Carubv10011629m.g	0.574651	0.0243283	AT1G09230	0	RNA-binding (RRM/RBD/RNP motifs) family protein
Carubv10009752m.g	-0.907847	NA	AT1G09240	ATNAS3,NAS3	nicotianamine synthase 3
Carubv10010033m.g	0.592785	0.00921849	AT1G56450	PBG1	20S proteasome beta subunit G1
Carubv10010314m.g	-2.17649	8.54594e-08	AT1G09250	0	basic helix-loop-helix (bHLH) DNA-binding superfamily protein
Carubv10011976m.g	-0.681876	0.000218282	AT1G09270	IMPA-4	importin alpha isoform 4
Carubv10012485m.g	0.280304	0.227882	AT1G09280	0	0
Carubv10009568m.g	0.918408	0.000327285	AT1G09290	0	0
Carubv10009008m.g	-0.0850163	0.743859	AT1G09300	0	Metallopeptidase M24 family protein
Carubv10010410m.g	-0.741905	0.492913	AT1G09310	0	Protein of unknown function, DUF538
Carubv10008882m.g	-0.00786921	0.980965	AT1G09320	ADCP1	agenet domain-containing protein
Carubv10012409m.g	-0.470954	NA	AT1G09330	0	0
Carubv10009455m.g	-0.310471	0.110966	AT1G09340	CRB,CSP41B	chloroplast RNA binding
Carubv10009676m.g	0.520309	NA	AT1G09350	AtGolS3,GolS3	galactinol synthase 3
Carubv10011513m.g	6.35974	1.36421e-11	AT1G09360	0	Plant invertase/pectin methylesterase inhibitor superfamily protein
Carubv10010434m.g	5.34523	1.04431e-42	AT1G09370	0	Plant invertase/pectin methylesterase inhibitor superfamily protein
Carubv10009476m.g	-0.959569	0.000787548	AT1G09380	0	nodulin MtN21 /EamA-like transporter family protein
Carubv10011694m.g	2.19032	2.51184e-07	AT1G09390	0	GDSL-like Lipase/Acylhydrolase superfamily protein
Carubv10009647m.g	0.061312	0.884861	AT1G09400	0	FMN-linked oxidoreductases superfamily protein
Carubv10010860m.g	0.5478	0.461153	AT1G09415	NIMIN-3	NIM1-interacting 3
Carubv10011205m.g	0.148922	0.690873	AT1G09420	G6PD4	glucose-6-phosphate dehydrogenase 4
Carubv10009231m.g	-0.438706	0.0233563	AT1G09430	ACLA-3	ATP-citrate lyase A-3
Carubv10009469m.g	1.06705	0.00027514	AT1G09440	0	Protein kinase superfamily protein
Carubv10008644m.g	0.182935	0.447375	AT1G09450	0	Protein kinase superfamily protein
Carubv10009486m.g	-0.470954	NA	AT1G09460	0	Carbohydrate-binding X8 domain superfamily protein
Carubv10009671m.g	0.66406	0.246277	AT1G09470	0	0
Carubv10009753m.g	-0.280903	0.466647	AT1G09480	0	NAD(P)-binding Rossmann-fold superfamily protein
Carubv10009736m.g	0.819496	0.371686	AT1G09500	0	NAD(P)-binding Rossmann-fold superfamily protein
Carubv10011960m.g	3.34546	9.07003e-21	AT1G09510	0	NAD(P)-binding Rossmann-fold superfamily protein
Carubv10012528m.g	0.176653	0.610128	AT1G09520	0	0
Carubv10008815m.g	-1.56305	0.0757	AT1G09530	PAP3,PIF3,POC1	phytochrome interacting factor 3
Carubv10009497m.g	-1.0701	6.74182e-05	AT1G09540	ATMYB61,MYB61	myb domain protein 61
Carubv10011324m.g	7.53476	7.22698e-22	AT1G09550	0	Pectinacetylesterase family protein
Carubv10010233m.g	-0.653494	0.0271583	AT1G09560	GLP5	germin-like protein 5
Carubv10008141m.g	-0.574238	0.0160743	AT1G09570	FHY2,FRE1,HY8,PHYA	phytochrome A
Carubv10009897m.g	-0.717742	0.00672741	AT1G09575	0	Protein of unknown function (DUF607)
Carubv10010159m.g	0.205117	0.500111	AT1G09580	0	emp24/gp25L/p24 family/GOLD family protein
Carubv10010498m.g	-0.108938	0.617975	AT1G09590	0	Translation protein SH3-like family protein
Carubv10008488m.g	-0.0377063	0.94304	AT1G09600	0	Protein kinase superfamily protein
Carubv10011736m.g	-0.470954	NA	AT1G09610	0	Protein of unknown function (DUF579)
Carubv10008148m.g	-0.222575	0.202298	AT1G09620	0	ATP binding;leucine-tRNA ligases;aminoacyl-tRNA ligases;nucleotide binding;ATP binding;aminoacyl-tRNA ligases
Carubv10010267m.g	-0.467718	0.0262711	AT1G09630	ATRAB-A2A,ATRAB11C,ATRABA2A,RAB-A2A,RAB11c	RAB GTPase 11C
Carubv10009284m.g	0.0668521	0.749436	AT1G09640	0	Translation elongation factor EF1B, gamma chain
Carubv10010723m.g	-0.889024	0.000101515	AT1G09645	0	0
Carubv10009882m.g	-0.551033	0.0140365	AT1G09660	0	RNA-binding KH domain-containing protein
Carubv10011501m.g	-0.470954	NA	AT1G09665	0	Toll-Interleukin-Resistance (TIR) domain family protein
Carubv10008618m.g	1.33555	0.00198347	AT1G09680	0	Pentatricopeptide repeat (PPR) superfamily protein
Carubv10010433m.g	0.181643	0.523493	AT1G09590	0	Translation protein SH3-like family protein
Carubv10009604m.g	0.675392	0.00146847	AT1G09700	DRB1,HYL1	dsRNA-binding domain-like superfamily protein
Carubv10010985m.g	1.78761	0.00740452	AT1G09710	0	Homeodomain-like superfamily protein
Carubv10011130m.g	-1.12961	0.246199	AT1G09720	0	Kinase interacting (KIP1-like) family protein
Carubv10008238m.g	-0.514586	0.00440055	AT1G09730	0	Cysteine proteinases superfamily protein
Carubv10010470m.g	-0.463229	0.0522497	AT1G09740	0	Adenine nucleotide alpha hydrolases-like superfamily protein
Carubv10008880m.g	0.270546	0.324411	AT1G09750	0	Eukaryotic aspartyl protease family protein
Carubv10012046m.g	-0.0688581	0.794743	AT1G09760	U2A\'	U2 small nuclear ribonucleoprotein A
Carubv10008427m.g	0.0134148	0.962723	AT1G09770	ATCDC5,ATMYBCDC5,CDC5	cell division cycle 5
Carubv10008742m.g	-0.471433	NA	AT1G09780	0	Phosphoglycerate mutase, 2,3-bisphosphoglycerate-independent
Carubv10011331m.g	0.154685	0.882536	AT1G09790	COBL6	COBRA-like protein 6 precursor
Carubv10011733m.g	-0.135247	0.535012	AT1G09795	ATATP-PRT2,ATP-PRT2,HISN1B	ATP phosphoribosyl transferase 2
Carubv10009493m.g	0.891757	6.71017e-05	AT1G09800	0	Pseudouridine synthase family protein
Carubv10011018m.g	1.44435	4.12168e-06	AT1G09810	ECT11	evolutionarily conserved C-terminal region 11
Carubv10010622m.g	-0.525976	NA	AT1G09812	0	0
Carubv10010654m.g	0.140298	0.616348	AT1G09815	POLD4	polymerase delta 4
Carubv10010987m.g	-0.470954	NA	AT1G09820	0	Pentatricopeptide repeat (PPR-like) superfamily protein
Carubv10008837m.g	0.267308	0.271818	AT1G09830	0	Glycinamide ribonucleotide (GAR) synthetase
Carubv10009250m.g	0.211079	0.287519	AT1G09840	ATSK41,SK41	shaggy-like protein kinase 41
Carubv10009056m.g	-1.43086	1.24602e-05	AT1G09850	XBCP3	xylem bark cysteine peptidase 3
Carubv10011209m.g	-3.38226	0.00816553	AT1G09860	ATPUP16,PUP16	purine permease 16
Carubv10008976m.g	-0.363374	0.0752087	AT1G09870	0	histidine acid phosphatase family protein
Carubv10008518m.g	5.52845	5.19427e-61	AT1G09880	0	Rhamnogalacturonate lyase family protein
Carubv10010965m.g	-2.14748	0.0222523	AT1G09890	0	Rhamnogalacturonate lyase family protein
Carubv10011677m.g	-0.470954	NA	AT1G09900	0	Pentatricopeptide repeat (PPR-like) superfamily protein
Carubv10008508m.g	0.835528	5.70969e-05	AT1G09910	0	Rhamnogalacturonate lyase family protein
Carubv10010346m.g	-0.365335	0.117127	AT1G09920	0	TRAF-type zinc finger-related
Carubv10011782m.g	4.02395	1.64398e-31	AT1G09930	ATOPT2,OPT2	oligopeptide transporter 2
Carubv10011217m.g	-0.470954	NA	AT1G09932	0	Phosphoglycerate mutase family protein
Carubv10011120m.g	0.200069	NA	AT1G09935	0	Phosphoglycerate mutase family protein
Carubv10008813m.g	-0.10407	0.662502	AT1G09940	HEMA2	Glutamyl-tRNA reductase family protein
Carubv10010176m.g	0.786738	0.121604	AT1G09950	RAS1	RESPONSE TO ABA AND SALT 1
Carubv10008236m.g	2.20043	0.000447831	AT1G35660	0	0
Carubv10009920m.g	-0.470954	NA	0	0	0
Carubv10008327m.g	-0.470954	NA	AT5G35430	0	Tetratricopeptide repeat (TPR)-like superfamily protein
Carubv10008337m.g	2.04033	0.00039904	AT1G35660	0	0
Carubv10008890m.g	0.400809	0.109133	AT1G09960	ATSUC4,ATSUT4,SUC4,SUT4	sucrose transporter 4
Carubv10008210m.g	-1.42937	2.9167e-08	AT1G09970	LRR XI-23,RLK7	Leucine-rich receptor-like protein kinase family protein
Carubv10011744m.g	-0.0917227	0.726735	AT1G09980	0	Putative serine esterase family protein
Carubv10009053m.g	1.25537	0.000257194	AT1G10010	AAP8,ATAAP8	amino acid permease 8
Carubv10012383m.g	4.69221	5.27535e-47	AT1G10010	AAP8,ATAAP8	amino acid permease 8
Carubv10009083m.g	-1.47286	2.52187e-10	AT1G10020	0	Protein of unknown function (DUF1005)
Carubv10010632m.g	-0.294065	0.512601	AT1G10030	ERG28	homolog of yeast ergosterol28
Carubv10009269m.g	-0.172006	0.817789	AT1G10040	0	alpha/beta-Hydrolases superfamily protein
Carubv10008147m.g	-0.177704	0.37686	AT1G10050	0	glycosyl hydrolase family 10 protein / carbohydrate-binding domain-containing protein
Carubv10010964m.g	2.17006	1.09804e-09	AT1G10060	ATBCAT-1,BCAT-1	branched-chain amino acid transaminase 1
Carubv10009962m.g	0.350325	0.170049	AT1G58983	0	Ribosomal protein S5 family protein
Carubv10009404m.g	0.0558367	NA	AT1G10070	ATBCAT-2,BCAT-2	branched-chain amino acid transaminase 2
Carubv10008381m.g	2.64805	1.75012e-15	AT1G10090	0	Early-responsive to dehydration stress protein (ERD4)
Carubv10009225m.g	-0.183675	0.455266	AT1G10095	0	Protein prenylyltransferase superfamily protein
Carubv10009514m.g	0.0278671	0.927955	AT1G10120	0	basic helix-loop-helix (bHLH) DNA-binding superfamily protein
Carubv10010701m.g	-0.88285	0.0174665	0	0	0
Carubv10008220m.g	-0.4058	0.025448	AT1G10130	ATECA3,ECA3	endoplasmic reticulum-type calcium-transporting ATPase 3
Carubv10010449m.g	-2.25596	0.0966682	AT1G10140	0	Uncharacterised conserved protein UCP031279
Carubv10009272m.g	-1.40876	1.2058e-07	AT1G10150	0	Carbohydrate-binding protein
Carubv10010397m.g	0.256959	0.872031	AT1G10155	ATPP2-A10,PP2-A10	phloem protein 2-A10
Carubv10010627m.g	-0.822845	0.000150638	0	0	0
Carubv10011742m.g	-0.473036	0.0268401	AT1G10180	0	0
Carubv10010373m.g	0.595478	0.061104	AT1G10200	WLIM1	GATA type zinc finger transcription factor family protein
Carubv10010274m.g	-0.762975	0.612393	AT1G59590	ZCF37	ZCF37
Carubv10010417m.g	0.326885	NA	AT1G10220	0	0
Carubv10010290m.g	0.488393	0.0228958	AT1G10230	ASK18,SK18	SKP1-like 18
Carubv10012599m.g	0.213073	0.419935	AT1G10240	FRS11	FAR1-related sequence 11
Carubv10012602m.g	0.105304	0.627713	AT1G10270	GRP23	glutamine-rich protein 23
Carubv10012092m.g	-0.290944	0.389828	AT1G10280	0	Core-2/I-branching beta-1,6-N-acetylglucosaminyltransferase family protein
Carubv10008252m.g	-0.973513	1.05017e-09	AT1G10290	ADL6,DRP2A	dynamin-like protein 6
Carubv10011682m.g	-0.0450613	0.838721	AT5G53150	0	DNAJ heat shock N-terminal domain-containing protein
Carubv10012210m.g	1.09518	0.507182	AT1G10300	0	Nucleolar GTP-binding protein
Carubv10012297m.g	-0.0926427	NA	AT4G05350	0	RING/U-box superfamily protein
Carubv10011121m.g	1.03778	5.20556e-05	AT1G10310	0	NAD(P)-binding Rossmann-fold superfamily protein
Carubv10012360m.g	0.129421	0.545408	AT1G10320	0	Zinc finger C-x8-C-x5-C-x3-H type family protein
Carubv10011208m.g	-0.405282	0.401378	AT1G10330	0	Tetratricopeptide repeat (TPR)-like superfamily protein
Carubv10010752m.g	-0.0536399	0.88324	0	0	0
Carubv10009603m.g	0.156778	0.605926	AT1G10350	0	DNAJ heat shock family protein
Carubv10010208m.g	1.06407	3.62522e-05	AT1G10360	ATGSTU18,GST29,GSTU18	glutathione S-transferase TAU 18
Carubv10010042m.g	1.74292	0.000150607	AT1G10370	ATGSTU17,ERD9,GST30,GST30B	Glutathione S-transferase family protein
Carubv10009641m.g	0.243289	0.692542	AT1G10380	0	Putative membrane lipoprotein
Carubv10012362m.g	-1.13161	6.62834e-05	AT1G10385	0	Vps51/Vps67 family (components of vesicular transport) protein
Carubv10008140m.g	-0.325558	0.0451401	AT1G10390	0	Nucleoporin autopeptidase
Carubv10012329m.g	-0.861069	NA	AT1G10400	0	UDP-Glycosyltransferase superfamily protein
Carubv10011985m.g	0.0118057	0.963365	AT1G10410	0	Protein of unknown function (DUF1336)
Carubv10009270m.g	-0.283049	0.462258	AT1G10417	0	0
Carubv10011401m.g	-0.19554	0.398097	AT1G59820	ALA3	aminophospholipid ATPase 3
Carubv10009843m.g	-0.0246036	0.936746	AT1G10430	PP2A-2	protein phosphatase 2A-2
Carubv10008167m.g	-0.283141	0.199438	AT1G10450	SNL6	SIN3-like 6
Carubv10010030m.g	-0.139752	0.839665	AT1G10470	ARR4,ATRR1,IBC7,MEE7	response regulator 4
Carubv10012103m.g	-0.0933975	NA	AT1G10480	ZFP5	zinc finger protein 5
Carubv10012139m.g	0.877186	2.95677e-06	AT1G10490	0	Domain of unknown function (DUF1726) ;Putative ATPase (DUF699)
Carubv10010414m.g	-0.134566	0.591315	AT1G10500	ATCPISCA,CPISCA	chloroplast-localized ISCA-like protein
Carubv10012462m.g	-0.221368	0.562683	AT1G10520	0	DNA polymerase lambda (POLL)
Carubv10010489m.g	-0.8624	NA	AT1G10530	0	0
Carubv10011003m.g	0.763374	9.94969e-05	AT1G10540	ATNAT8,NAT8	nucleobase-ascorbate transporter 8
Carubv10009787m.g	0.0279448	0.950456	AT1G10550	XET,XTH33	xyloglucan:xyloglucosyl transferase 33
Carubv10011817m.g	3.18623	0.0128705	AT4G09545	0	ECA1 gametogenesis related family protein
Carubv10008393m.g	0.723801	0.291764	AT1G10560	ATPUB18,PUB18	plant U-box 18
Carubv10011329m.g	-0.130285	0.656745	AT1G10570	OTS2,ULP1C	Cysteine proteinases superfamily protein
Carubv10008709m.g	0.529393	0.0115354	AT1G10580	0	Transducin/WD40 repeat-like superfamily protein
Carubv10010416m.g	1.83315	0.251079	AT1G10585	0	basic helix-loop-helix (bHLH) DNA-binding superfamily protein
Carubv10011373m.g	0.352788	NA	AT1G10586	0	basic helix-loop-helix (bHLH) DNA-binding superfamily protein
Carubv10012286m.g	-0.0933975	NA	AT1G10588	0	Gibberellin-regulated family protein
Carubv10010598m.g	-0.272084	0.231549	AT1G10590	0	Nucleic acid-binding, OB-fold-like protein
Carubv10011162m.g	1.32689	1.92671e-05	AT1G10600	AMSH2	associated molecule with the SH3 domain of STAM 2
Carubv10012182m.g	0.812563	0.125754	AT1G10610	0	basic helix-loop-helix (bHLH) DNA-binding superfamily protein
Carubv10012045m.g	-0.948605	0.563865	AT1G10620	0	Protein kinase superfamily protein
Carubv10010344m.g	-0.88012	1.13146e-05	AT1G10630	ARFA1F,ATARFA1F	ADP-ribosylation factor A1F
Carubv10008765m.g	0.355096	0.5506	AT1G10640	0	Pectin lyase-like superfamily protein
Carubv10009658m.g	-0.684119	0.00188843	AT1G10650	0	SBP (S-ribonuclease binding protein) family protein
Carubv10010722m.g	-1.81042	5.7345e-05	AT1G10657	0	Plant protein 1589 of unknown function
Carubv10009779m.g	0.0206159	0.945017	AT1G10660	0	0
Carubv10011514m.g	-1.12939	9.29916e-11	AT1G10670	ACLA-1	ATP-citrate lyase A-1
Carubv10011664m.g	4.15286	2.98296e-17	AT1G10680	PGP10	P-glycoprotein 10
Carubv10010693m.g	-0.405385	0.818149	AT1G10690	0	0
Carubv10009207m.g	-0.167181	0.606172	AT1G10700	PRS3	phosphoribosyl pyrophosphate (PRPP) synthase 3
Carubv10009567m.g	-1.62822	0.00147376	AT1G10710	PHS1	poor homologous synapsis 1
Carubv10009128m.g	-0.125492	0.601642	AT1G10720	0	BSD domain-containing protein
Carubv10009212m.g	-0.445713	0.00922432	AT1G60780	HAP13	Clathrin adaptor complexes medium subunit family protein
Carubv10009032m.g	1.0731	0.00757289	AT1G10740	0	alpha/beta-Hydrolases superfamily protein
Carubv10012645m.g	2.88593	1.26015e-15	AT1G10745	0	Maternally expressed gene (MEG) family protein
Carubv10011759m.g	2.57	6.31364e-05	AT1G10745	0	Maternally expressed gene (MEG) family protein
Carubv10010942m.g	1.06336	0.0169145	AT1G10747	0	Maternally expressed gene (MEG) family protein
Carubv10009043m.g	1.33701	0.0252275	AT1G10750	0	Protein of Unknown Function (DUF239)
Carubv10008131m.g	0.380175	0.131438	AT1G10760	GWD,GWD1,SEX1,SOP,SOP1	Pyruvate phosphate dikinase, PEP/pyruvate binding domain
Carubv10010490m.g	-1.19096	0.00171386	AT1G10770	0	Plant invertase/pectin methylesterase inhibitor superfamily protein
Carubv10009265m.g	-0.163622	0.579104	AT1G10780	0	F-box/RNI-like superfamily protein
Carubv10011389m.g	6.11546	8.06128e-26	AT1G10790	0	0
Carubv10010900m.g	-1.23289	NA	AT1G10800	0	0
Carubv10010034m.g	-0.189966	0.385447	AT1G10820	0	Protein of unknown function (DUF3755)
Carubv10009509m.g	0.488135	0.0834921	AT1G10830	Z-ISO,Z-ISO1.1,Z-ISO1.2	15-cis-zeta-carotene isomerase
Carubv10012627m.g	0.0352465	0.86207	AT1G10840	TIF3H1	translation initiation factor 3 subunit H1
Carubv10011198m.g	-1.62266	3.99801e-18	AT1G10850	0	Leucine-rich repeat protein kinase family protein
Carubv10011084m.g	-1.30041	5.19729e-08	AT1G10870	AGD4	ARF-GAP domain 4
Carubv10012419m.g	-4.79194	1.3278e-06	AT1G10880	0	Core-2/I-branching beta-1,6-N-acetylglucosaminyltransferase family protein
Carubv10011265m.g	2.73836	3.46466e-11	AT1G10870	AGD4	ARF-GAP domain 4
Carubv10009394m.g	1.64966	0.0252171	AT3G13680	0	F-box and associated interaction domains-containing protein
Carubv10008368m.g	0.217076	0.447375	AT1G10900	0	Phosphatidylinositol-4-phosphate 5-kinase family protein
Carubv10008215m.g	1.1411	0.0106221	AT5G48620	0	Disease resistance protein (CC-NBS-LRR class) family
Carubv10012033m.g	-0.106576	0.658498	AT1G10930	ATRECQ4A,ATSGS1,RECQ4A	DNA helicase (RECQl4A)
Carubv10009533m.g	-0.183885	0.385133	AT1G10940	ASK1,SNRK2-4,SNRK2.4,SRK2A	Protein kinase superfamily protein
Carubv10011995m.g	-1.25114	5.82489e-14	AT1G10950	AtTMN1,TMN1	transmembrane nine 1
Carubv10010893m.g	-0.470954	NA	AT1G10960	ATFD1,FD1	ferredoxin 1
Carubv10009291m.g	-0.428244	0.189504	AT1G10970	ATZIP4,ZIP4	zinc transporter 4 precursor
Carubv10008829m.g	0.867602	0.00726886	AT1G10980	0	Lung seven transmembrane receptor family protein
Carubv10010713m.g	-2.04963	0.037088	0	0	0
Carubv10008710m.g	0.939678	0.172567	AT1G11000	ATMLO4,MLO4	Seven transmembrane MLO family protein
Carubv10009723m.g	-0.264268	0.315663	AT1G11020	0	RING/FYVE/PHD zinc finger superfamily protein
Carubv10011013m.g	1.12561	0.47045	AT1G11040	0	HSP40/DnaJ peptide-binding protein
Carubv10008580m.g	0.592688	0.233376	AT1G11050	0	Protein kinase superfamily protein
Carubv10008277m.g	-0.603428	0.00358444	AT1G11060	0	WAPL (Wings apart-like protein regulation of heterochromatin) protein
Carubv10008313m.g	1.23009	8.19158e-06	AT1G11070	0	0
Carubv10008980m.g	0.910452	0.553187	AT1G11080	scpl31	serine carboxypeptidase-like 31
Carubv10011807m.g	-0.208202	0.522491	AT1G11090	0	alpha/beta-Hydrolases superfamily protein
Carubv10009663m.g	2.63267	6.81853e-27	AT1G61150	0	LisH and RanBPM domains containing protein
Carubv10011297m.g	0.940863	0.253802	AT1G11112	0	0
Carubv10010513m.g	-0.424413	0.600804	AT1G11120	0	0
Carubv10010002m.g	2.20098	0.0011995	AT1G11125	0	0
Carubv10008374m.g	0.0302631	0.949532	AT1G11130	SCM,SRF9,SUB	Leucine-rich repeat protein kinase family protein
Carubv10011222m.g	0.363992	0.782839	AT5G01140	0	Protein of unknown function (DUF674)
Carubv10008176m.g	-0.881675	0.0239	AT1G11160	0	Transducin/WD40 repeat-like superfamily protein
Carubv10009178m.g	-1.45323	0.0303194	AT1G11170	0	Protein of unknown function (DUF707)
Carubv10009907m.g	0.0980592	0.694628	AT1G11180	0	Secretory carrier membrane protein (SCAMP) family protein
Carubv10009855m.g	-2.91229	6.00804e-22	AT1G11190	BFN1,ENDO1	bifunctional nuclease i
Carubv10009893m.g	-0.389298	0.092357	AT1G11200	0	Protein of unknown function (DUF300)
Carubv10009737m.g	-0.867004	0.664133	AT1G11210	0	Protein of unknown function (DUF761)
Carubv10009857m.g	-0.938455	0.0163148	AT1G11220	0	Protein of unknown function (DUF761)
Carubv10010339m.g	0.49654	0.00756638	AT1G11240	0	0
Carubv10011255m.g	-1.73858	0.297783	AT1G61290	ATSYP124,SYP124	syntaxin of plants 124
Carubv10012241m.g	-0.0940458	NA	AT1G61340	0	F-box family protein
Carubv10011551m.g	5.59008	0.000603692	AT1G12180	0	0
Carubv10011868m.g	7.47055	5.22598e-16	AT1G12170	0	F-box family protein
Carubv10008705m.g	-0.844809	0.00023731	AT1G61350	0	ARM repeat superfamily protein
Carubv10011684m.g	-0.473658	NA	AT2G41590	0	0
Carubv10008855m.g	2.03442	2.5783e-05	AT1G11260	ATSTP1,STP1	sugar transporter 1
Carubv10010954m.g	-0.471732	NA	AT1G11280	0	S-locus lectin protein kinase family protein
Carubv10011264m.g	-0.104039	0.810133	AT1G11290	CRR22	Pentatricopeptide repeat (PPR) superfamily protein
Carubv10012649m.g	0.204215	0.856443	AT1G11300	0	protein serine/threonine kinases;protein kinases;ATP binding;sugar binding;kinases;carbohydrate binding
Carubv10008691m.g	0.463895	0.179404	AT1G11310	ATMLO2,MLO2,PMR2	Seven transmembrane MLO family protein
Carubv10009086m.g	-0.734822	0.575398	AT1G11310	ATMLO2,MLO2,PMR2	Seven transmembrane MLO family protein
Carubv10009253m.g	-1.2536	3.87903e-06	AT1G11320	0	0
Carubv10011980m.g	-0.237263	0.430374	AT1G11330	0	S-locus lectin protein kinase family protein
Carubv10008342m.g	0.562418	0.710532	AT1G11340	0	S-locus lectin protein kinase family protein
Carubv10011967m.g	4.15109	9.88941e-28	AT1G11362	0	Plant invertase/pectin methylesterase inhibitor superfamily protein
Carubv10009983m.g	-0.297622	0.232362	AT1G11360	0	Adenine nucleotide alpha hydrolases-like superfamily protein
Carubv10009760m.g	-0.806185	0.0645077	AT1G11580	ATPMEPCRA,PMEPCRA	methylesterase PCR A
Carubv10009956m.g	-2.28138	4.5121e-17	AT1G11380	0	PLAC8 family protein
Carubv10008587m.g	-1.9379	0.190695	AT1G11390	0	Protein kinase superfamily protein
Carubv10010225m.g	0.61932	0.00455336	AT1G11400	PYM	partner of Y14-MAGO
Carubv10008301m.g	-0.254731	0.519188	AT1G11410	0	S-locus lectin protein kinase family protein
Carubv10010192m.g	1.01968	0.000646006	AT1G11430	0	plastid developmental protein DAG, putative
Carubv10009508m.g	-0.219895	0.554091	AT1G11440	0	0
Carubv10012636m.g	0.512699	0.441185	AT1G11460	0	nodulin MtN21 /EamA-like transporter family protein
Carubv10010812m.g	0.201666	0.344509	AT1G11475	NRPB10,NRPD10,NRPE10	RNA polymerases N / 8 kDa subunit
Carubv10008685m.g	-0.801545	0.0797606	AT1G11480	0	eukaryotic translation initiation factor-related
Carubv10012610m.g	-3.31447	0.0139993	AT1G11490	0	zinc finger (C2H2 type) family protein
Carubv10010526m.g	0.202222	NA	AT1G11500	0	Protein of unknown function (DUF1218)
Carubv10011873m.g	1.23863	0.0016631	AT1G11510	0	DNA-binding storekeeper protein-related transcriptional regulator
Carubv10010679m.g	2.22282	0.0298015	AT1G11530	ATCXXS1,CXXS1	C-terminal cysteine residue is changed to a serine 1
Carubv10011874m.g	4.22985	1.96739e-29	AT1G11540	0	Sulfite exporter TauE/SafE family protein
Carubv10009849m.g	1.10536	0.0889769	AT1G11545	XTH8	xyloglucan endotransglucosylase/hydrolase 8
Carubv10011840m.g	-0.470954	NA	AT1G11560	0	Oligosaccharyltransferase complex/magnesium transporter family protein
Carubv10010585m.g	-0.907689	NA	AT1G11570	NTL	NTF2-like
Carubv10012507m.g	-0.471433	NA	AT1G11572	0	Plant thionin family protein
Carubv10008769m.g	-1.60726	0.00692732	AT1G11580	ATPMEPCRA,PMEPCRA	methylesterase PCR A
Carubv10012639m.g	-0.0940458	NA	AT1G02190	0	Fatty acid hydroxylase superfamily
Carubv10009064m.g	1.71544	0.197342	AT5G28237	0	Pyridoxal-5\'-phosphate-dependent enzyme family protein
Carubv10010998m.g	-1.2515	0.395919	AT3G51700	0	PIF1 helicase
Carubv10009203m.g	-0.116457	0.72068	AT1G61800	ATGPT2,GPT2	glucose-6-phosphate/phosphate translocator 2
Carubv10012176m.g	-0.470954	NA	AT4G11900	0	S-locus lectin protein kinase family protein
Carubv10008888m.g	-0.471403	NA	AT1G11600	CYP77B1	cytochrome P450, family 77, subfamily B, polypeptide 1
Carubv10011743m.g	2.67749	0.0174478	AT1G11620	0	F-box and associated interaction domains-containing protein
Carubv10011712m.g	0.352866	0.72671	AT1G11620	0	F-box and associated interaction domains-containing protein
Carubv10009327m.g	-0.32417	0.272201	AT1G11630	0	Tetratricopeptide repeat (TPR)-like superfamily protein
Carubv10009124m.g	-0.847035	2.09541e-05	AT1G11650	ATRBP45B,RBP45B	RNA-binding (RRM/RBD/RNP motifs) family protein
Carubv10011897m.g	-0.0593993	NA	AT1G11655	0	0
Carubv10008380m.g	-0.720053	1.98755e-05	AT1G11660	0	heat shock protein 70 (Hsp 70) family protein
Carubv10008916m.g	0.593475	0.230976	AT1G11670	0	MATE efflux family protein
Carubv10008973m.g	-0.519281	0.00414891	AT1G11680	CYP51,CYP51A2,CYP51G1,EMB1738	CYTOCHROME P450 51G1
Carubv10010144m.g	1.88157	4.79678e-07	AT1G11690	0	0
Carubv10010311m.g	0.996885	3.88117e-05	AT1G11700	0	Protein of unknown function, DUF584
Carubv10012420m.g	1.68116	1.09547e-06	AT1G11710	0	Pentatricopeptide repeat (PPR) superfamily protein
Carubv10011175m.g	0.632045	0.00420683	AT1G11720	ATSS3,SS3	starch synthase 3
Carubv10009427m.g	0.297286	0.780678	AT1G11730	0	Galactosyltransferase family protein
Carubv10011779m.g	-0.566636	0.276308	AT1G11740	0	ankyrin repeat family protein
Carubv10010008m.g	0.596374	0.00379066	AT1G11750	CLPP6,NCLPP1,NCLPP6	CLP protease proteolytic subunit 6
Carubv10012283m.g	-0.0480665	0.885822	AT1G11755	LEW1	Undecaprenyl pyrophosphate synthetase family protein
Carubv10010459m.g	-0.110888	0.718618	AT1G11760	MED32	0
Carubv10011450m.g	-0.812127	0.619561	AT1G11765	0	Plant self-incompatibility protein S1 family
Carubv10011431m.g	-3.21083	5.58458e-05	AT1G11770	0	FAD-binding Berberine family protein
Carubv10009622m.g	0.630562	0.0250352	AT1G11780	0	oxidoreductase, 2OG-Fe(II) oxygenase family protein
Carubv10009627m.g	0.949864	0.00124794	AT1G11790	ADT1	arogenate dehydratase 1
Carubv10012467m.g	0.577491	0.0137709	AT1G11820	0	O-Glycosyl hydrolases family 17 protein
Carubv10009942m.g	-0.261348	0.28293	AT1G11840	ATGLX1,GLX1	glyoxalase I homolog
Carubv10009236m.g	-0.185169	0.402437	AT1G11860	0	Glycine cleavage T-protein family
Carubv10012421m.g	-0.275642	0.200791	AT1G11870	ATSRS,OVA7,SRS	Seryl-tRNA synthetase
Carubv10008966m.g	-0.349227	0.110189	AT1G11880	0	transferases, transferring hexosyl groups
Carubv10010262m.g	-0.418392	0.0153983	AT1G11890	ATSEC22,SEC22	Synaptobrevin family protein
Carubv10012108m.g	-0.470954	NA	AT1G11900	0	Tetratricopeptide repeat (TPR)-like superfamily protein
Carubv10012392m.g	-0.470954	NA	AT1G11905	0	B-cell receptor-associated protein 31-like
Carubv10008798m.g	-0.115365	0.659911	AT1G11910	APA1,ATAPA1	aspartic proteinase A1
Carubv10009711m.g	-0.470954	NA	AT1G11915	0	0
Carubv10011187m.g	-0.470954	NA	AT1G11920	0	Pectin lyase-like superfamily protein
Carubv10010604m.g	-0.471433	NA	AT1G11925	0	Stigma-specific Stig1 family protein
Carubv10010142m.g	-0.382382	0.0863204	AT1G11930	0	Predicted pyridoxal phosphate-dependent enzyme, YBL036C type
Carubv10009428m.g	-0.520967	0.0732968	AT1G11940	0	Core-2/I-branching beta-1,6-N-acetylglucosaminyltransferase family protein
Carubv10011915m.g	1.69479	6.0628e-09	AT1G11950	0	Transcription factor jumonji (jmjC) domain-containing protein
Carubv10008363m.g	0.0180392	0.959221	AT1G11960	0	ERD (early-responsive to dehydration stress) family protein
Carubv10011821m.g	-4.24677	7.47946e-07	AT1G11990	0	O-fucosyltransferase family protein
Carubv10008719m.g	-0.322807	0.063533	AT1G12000	0	Phosphofructokinase family protein
Carubv10011493m.g	0.382705	0.288157	AT1G12010	0	2-oxoglutarate (2OG) and Fe(II)-dependent oxygenase superfamily protein
Carubv10010193m.g	0.656744	0.305581	AT1G12020	0	0
Carubv10009904m.g	0.27959	0.845366	AT1G12030	0	Protein of unknown function (DUF506)
Carubv10011166m.g	-0.131357	NA	AT1G12040	LRX1	leucine-rich repeat/extensin 1
Carubv10009247m.g	0.577504	0.00598202	AT1G12050	0	fumarylacetoacetase, putative
Carubv10012322m.g	0.0442011	0.909484	AT1G12060	ATBAG5,BAG5	BCL-2-associated athanogene 5
Carubv10010850m.g	1.46402	0.0291805	AT1G12064	0	0
Carubv10012423m.g	-0.29058	NA	AT1G12070	0	Immunoglobulin E-set superfamily protein
Carubv10011959m.g	1.4433	1.00024e-05	AT1G12090	ELP	extensin-like protein
Carubv10012658m.g	0.0175482	0.99202	AT1G12100	0	Bifunctional inhibitor/lipid-transfer protein/seed storage 2S albumin superfamily protein
Carubv10008661m.g	-0.955316	0.540205	AT1G12110	ATNRT1,B-1,CHL1,CHL1-1,NRT1,NRT1.1	nitrate transporter 1.1
Carubv10008871m.g	-1.24882	1.57968e-09	AT1G12120	0	Plant protein of unknown function (DUF863)
Carubv10012015m.g	-0.0593993	NA	AT1G12130	0	Flavin-binding monooxygenase family protein
Carubv10011483m.g	1.27784	1.01046e-08	AT1G12140	FMO GS-OX5	flavin-monooxygenase glucosinolate S-oxygenase 5
Carubv10009080m.g	2.1135	0.000409088	AT1G12140	FMO GS-OX5	flavin-monooxygenase glucosinolate S-oxygenase 5
Carubv10010971m.g	-1.85262	0.180792	AT1G12150	0	Plant protein of unknown function (DUF827)
Carubv10009045m.g	-0.11554	0.80669	AT1G12160	0	Flavin-binding monooxygenase family protein
Carubv10011836m.g	6.80316	9.93843e-25	AT1G12170	0	F-box family protein
Carubv10011951m.g	7.24555	6.85492e-19	AT1G12190	0	F-box and associated interaction domains-containing protein
Carubv10009065m.g	-1.20919	0.00377679	AT1G12200	0	Flavin-binding monooxygenase family protein
Carubv10008555m.g	1.01373	0.00249827	AT1G12300	0	Tetratricopeptide repeat (TPR)-like superfamily protein
Carubv10009318m.g	0.25498	0.351513	AT1G12230	0	Aldolase superfamily protein
Carubv10008995m.g	-2.06477	6.57143e-09	AT1G12240	ATBETAFRUCT4,VAC-INV	Glycosyl hydrolases family 32 protein
Carubv10012184m.g	1.30343	0.000220069	AT1G12244	0	Polynucleotidyl transferase, ribonuclease H-like superfamily protein
Carubv10012683m.g	1.76005	3.34486e-05	AT1G12250	0	Pentapeptide repeat-containing protein
Carubv10009366m.g	-1.27933	0.348336	AT1G12260	ANAC007,EMB2749,NAC007,VND4	NAC 007
Carubv10011737m.g	1.49594	0.0111026	AT1G12270	0	stress-inducible protein, putative
Carubv10012293m.g	-0.191905	0.639915	AT1G12280	0	LRR and NB-ARC domains-containing disease resistance protein
Carubv10008383m.g	2.63122	0.00339078	AT1G12290	0	Disease resistance protein (CC-NBS-LRR class) family
Carubv10011992m.g	-0.436462	0.0701761	AT1G12310	0	Calcium-binding EF-hand family protein
Carubv10010287m.g	-3.89484	3.37165e-05	AT1G12320	0	Protein of unknown function (DUF1442)
Carubv10008918m.g	0.241683	0.366516	AT1G12330	0	0
Carubv10012548m.g	0.514506	0.0244754	AT1G12350	ATCOAB,COAB	4-phospho-panto-thenoylcysteine synthetase
Carubv10011323m.g	-0.576922	0.00226205	AT1G12360	KEU	Sec1/munc18-like (SM) proteins superfamily
Carubv10011602m.g	0.626371	0.0182197	AT1G12370	PHR1,UVR2	photolyase 1
Carubv10011100m.g	-1.13228	2.29018e-05	AT1G12380	0	0
Carubv10012074m.g	-0.0227714	0.935999	AT1G12390	0	Cornichon family protein
Carubv10009963m.g	0.705603	0.000272528	AT1G12410	CLP2,CLPR2,NCLPP2	CLP protease proteolytic subunit 2
Carubv10009162m.g	-0.273076	0.742436	AT1G12420	ACR8	ACT domain repeat 8
Carubv10012549m.g	2.02754	4.19668e-07	AT3G27999	0	Plant invertase/pectin methylesterase inhibitor superfamily protein
Carubv10012144m.g	3.13689	1.63663e-12	AT1G11593	0	Plant invertase/pectin methylesterase inhibitor superfamily protein
Carubv10008964m.g	-0.0997148	0.914413	AT1G11590	0	Plant invertase/pectin methylesterase inhibitor superfamily
Carubv10008202m.g	0.139608	0.636314	AT1G12430	ARK3,PAK	armadillo repeat kinesin 3
Carubv10010492m.g	0.242465	0.256616	AT1G12440	0	A20/AN1-like zinc finger family protein
Carubv10009868m.g	-1.15674	1.46556e-06	AT1G12450	0	SNARE associated Golgi protein family
Carubv10008271m.g	-0.470954	NA	AT1G12460	0	Leucine-rich repeat protein kinase family protein
Carubv10008889m.g	-0.470954	NA	AT1G62960	ACS10	ACC synthase 10
Carubv10008200m.g	-0.445723	0.00364268	AT1G12470	0	zinc ion binding
Carubv10011981m.g	-0.470954	NA	AT1G12480	CDI3,OZS1,RCD3,SLAC1	C4-dicarboxylate transporter/malic acid transport protein
Carubv10009549m.g	-0.744689	0.0740028	AT1G12500	0	Nucleotide-sugar transporter family protein
Carubv10011816m.g	-0.745492	0.00158011	AT1G12520	ATCCS,CCS	copper chaperone for SOD1
Carubv10012364m.g	-0.553444	0.08838	AT1G12530	0	0
Carubv10011792m.g	0.599483	NA	AT1G12540	0	basic helix-loop-helix (bHLH) DNA-binding superfamily protein
Carubv10009669m.g	0.270674	0.422439	AT1G12550	0	D-isomer specific 2-hydroxyacid dehydrogenase family protein
Carubv10011828m.g	-0.0933975	NA	AT1G12560	ATEXP7,ATEXPA7,ATHEXP ALPHA 1.26,EXP7,EXPA7	expansin A7
Carubv10008714m.g	-6.48792	1.83042e-06	AT1G12570	0	Glucose-methanol-choline (GMC) oxidoreductase family protein
Carubv10008851m.g	-0.566385	0.00190604	AT1G12580	PEPKR1	phosphoenolpyruvate carboxylase-related kinase 1
Carubv10009601m.g	-0.439601	0.30955	AT1G12600	0	UDP-N-acetylglucosamine (UAA) transporter family
Carubv10010303m.g	-1.86802	0.295253	AT1G12610	DDF1	Integrase-type DNA-binding superfamily protein
Carubv10011758m.g	-0.0199108	0.968459	AT1G12300	0	Tetratricopeptide repeat (TPR)-like superfamily protein
Carubv10012127m.g	0.628724	0.0152079	AT1G12300	0	Tetratricopeptide repeat (TPR)-like superfamily protein
Carubv10011428m.g	0.535637	0.0863343	AT1G12300	0	Tetratricopeptide repeat (TPR)-like superfamily protein
Carubv10012147m.g	1.4047	0.284965	AT1G12630	0	Integrase-type DNA-binding superfamily protein
Carubv10009061m.g	-0.664187	0.024377	AT1G12640	0	MBOAT (membrane bound O-acyl transferase) family protein
Carubv10010126m.g	0.333647	0.209579	AT1G12650	0	0
Carubv10010857m.g	-2.98449	0.00785172	AT1G12660	0	0
Carubv10011831m.g	-0.952008	NA	AT1G12663	0	0
Carubv10011145m.g	5.69485	1.5432e-17	AT1G12665	0	0
Carubv10012242m.g	0.345523	NA	AT1G12660	0	0
Carubv10012592m.g	0.956239	NA	AT1G12672	0	0
Carubv10010628m.g	0.935602	NA	AT1G12672	0	0
Carubv10009041m.g	-0.220935	0.328002	AT1G12680	PEPKR2	phosphoenolpyruvate carboxylase-related kinase 2
Carubv10011393m.g	0.319294	0.70747	AT1G12700	0	ATP binding;nucleic acid binding;helicases
Carubv10012052m.g	0.811917	0.075987	AT1G12700	0	ATP binding;nucleic acid binding;helicases
Carubv10009895m.g	-0.033886	0.929185	AT1G12710	AtPP2-A12,PP2-A12	phloem protein 2-A12
Carubv10009259m.g	0.8988	0.00172473	AT1G12730	0	GPI transamidase subunit PIG-U
Carubv10010788m.g	1.08915	0.0164783	0	0	0
Carubv10011917m.g	0.671437	0.243671	AT1G12750	ATRBL6,RBL6	RHOMBOID-like protein 6
Carubv10011891m.g	1.31505	0.00830995	AT1G12300	0	Tetratricopeptide repeat (TPR)-like superfamily protein
Carubv10009353m.g	-1.31544	3.57108e-12	AT1G12760	0	Zinc finger, C3HC4 type (RING finger) family protein
Carubv10008776m.g	0.540605	0.0173527	AT1G12770	EMB1586,ISE1	P-loop containing nucleoside triphosphate hydrolases superfamily protein
Carubv10012310m.g	-0.470954	NA	AT1G12300	0	Tetratricopeptide repeat (TPR)-like superfamily protein
Carubv10009592m.g	-1.27374	7.6389e-06	AT1G12780	ATUGE1,UGE1	UDP-D-glucose/UDP-D-galactose 4-epimerase 1
Carubv10012622m.g	1.02943	0.000614399	AT1G12790	0	0
Carubv10008376m.g	0.943247	8.79526e-06	AT1G12800	0	Nucleic acid-binding, OB-fold-like protein
Carubv10010879m.g	0.932299	0.590484	AT1G12805	0	nucleotide binding
Carubv10011061m.g	0.332514	0.218069	AT1G12810	0	proline-rich family protein
Carubv10012250m.g	-0.790615	4.1428e-05	AT1G12820	AFB3	auxin signaling F-box 3
Carubv10009467m.g	-0.61969	0.000683154	AT1G12840	ATVHA-C,DET3	vacuolar ATP synthase subunit C (VATC) / V-ATPase C subunit / vacuolar proton pump C subunit (DET3)
Carubv10012535m.g	1.15626	0.33434	AT1G12845	0	0
Carubv10009343m.g	-0.0626625	0.841972	AT1G12850	0	Phosphoglycerate mutase family protein
Carubv10012093m.g	-0.147038	NA	AT1G12855	0	F-box family protein
Carubv10009081m.g	-1.8453	8.05483e-10	AT1G12860	ICE2,SCRM2	basic helix-loop-helix (bHLH) DNA-binding superfamily protein
Carubv10011604m.g	3.62198	8.9094e-28	AT1G12855	0	F-box family protein
Carubv10011720m.g	2.26204	1.68404e-07	AT1G12870	0	F-box and associated interaction domains-containing protein
Carubv10010219m.g	0.242123	0.64274	AT1G12880	atnudt12,NUDT12	nudix hydrolase homolog 12
Carubv10012659m.g	2.78858	5.42098e-09	AT1G12890	0	Integrase-type DNA-binding superfamily protein
Carubv10009349m.g	1.03278	0.0018032	AT1G12900	GAPA-2	glyceraldehyde 3-phosphate dehydrogenase A subunit 2
Carubv10011643m.g	0.348725	0.160738	AT1G12910	ATAN11,LWD1	Transducin/WD40 repeat-like superfamily protein
Carubv10009183m.g	-0.259681	0.214528	AT1G12920	ERF1-2	eukaryotic release factor 1-2
Carubv10011575m.g	0.335018	0.105125	AT1G12930	0	ARM repeat superfamily protein
Carubv10008932m.g	-0.742735	0.531222	AT1G12940	ATNRT2.5,NRT2.5	nitrate transporter2.5
Carubv10011529m.g	-0.251571	0.858743	AT1G12950	RSH2	root hair specific 2
Carubv10009069m.g	2.19632	7.98517e-20	AT1G12970	PIRL3	plant intracellular ras group-related LRR 3
Carubv10011023m.g	0.349541	NA	AT1G12980	DRN,ESR1	Integrase-type DNA-binding superfamily protein
Carubv10009381m.g	-0.879749	0.000235777	AT1G12990	0	beta-1,4-N-acetylglucosaminyltransferase family protein
Carubv10011103m.g	0.0479371	0.909426	AT1G13000	0	Protein of unknown function (DUF707)
Carubv10008811m.g	-0.154511	0.501348	AT1G13020	EIF4B2	eukaryotic initiation factor 4B2
Carubv10008617m.g	0.319223	0.0807474	AT1G13030	0	sphere organelles protein-related
Carubv10012598m.g	0.212392	0.538128	AT1G13040	0	Pentatricopeptide repeat (PPR-like) superfamily protein
Carubv10011087m.g	0.416951	0.203061	AT1G13050	0	0
Carubv10009991m.g	0.101312	0.638248	AT1G13060	PBE1	20S proteasome beta subunit E1
Carubv10008923m.g	-0.712886	0.441002	AT1G13080	CYP71B2	cytochrome P450, family 71, subfamily B, polypeptide 2
Carubv10008934m.g	0.933873	0.545974	AT1G13080	CYP71B2	cytochrome P450, family 71, subfamily B, polypeptide 2
Carubv10010669m.g	-0.00610445	NA	0	0	0
Carubv10011437m.g	9.95312	6.70716e-37	AT3G61177	LCR53	low-molecular-weight cysteine-rich 53
Carubv10008625m.g	0.300848	0.188005	AT1G13120	emb1745	embryo defective 1745
Carubv10008758m.g	1.91436	2.58244e-08	AT1G13130	0	Cellulase (glycosyl hydrolase family 5) protein
Carubv10010685m.g	-0.0308528	0.953691	0	0	0
Carubv10008325m.g	0.0663462	0.73446	AT1G13160	0	ARM repeat superfamily protein
Carubv10008320m.g	-0.986332	8.59037e-06	AT1G13170	ORP1D	OSBP(oxysterol binding protein)-related protein 1D
Carubv10009216m.g	-0.793414	3.0572e-05	AT1G13180	ARP3,ATARP3,DIS1	Actin-like ATPase superfamily protein
Carubv10008697m.g	0.369849	0.824993	AT1G13190	0	RNA-binding (RRM/RBD/RNP motifs) family protein
Carubv10010035m.g	-0.422256	0.288513	AT1G13195	0	RING/U-box superfamily protein
Carubv10008116m.g	0.247393	0.837795	AT1G13210	ACA.l	autoinhibited Ca2+/ATPase II
Carubv10011605m.g	0.535131	0.0050479	AT1G13220	LINC2	nuclear matrix constituent protein-related
Carubv10009239m.g	-0.119718	0.841242	AT1G13230	0	Leucine-rich repeat (LRR) family protein
Carubv10012257m.g	-0.96745	0.526714	AT1G13245	DVL4,RTFL17	ROTUNDIFOLIA like 17
Carubv10010952m.g	0.358345	0.624891	AT1G13250	GATL3	galacturonosyltransferase-like 3
Carubv10009612m.g	0.772246	0.667123	AT1G13260	EDF4,RAV1	related to ABI3/VP1 1
Carubv10009496m.g	0.821062	0.000204365	AT1G13270	MAP1B,MAP1C	methionine aminopeptidase 1B
Carubv10010123m.g	1.06543	4.61087e-07	AT1G13280	AOC4	allene oxide cyclase 4
Carubv10012013m.g	-0.470954	NA	AT1G13290	DOT5,WIP6	C2H2-like zinc finger protein
Carubv10011925m.g	-0.470954	NA	AT1G13300	HRS1	myb-like transcription factor family protein
Carubv10012068m.g	1.52659	0.078982	AT1G13310	0	Endosomal targeting BRO1-like domain-containing protein
Carubv10008615m.g	-0.113874	0.58653	AT1G13320	PP2AA3	protein phosphatase 2A subunit A3
Carubv10011847m.g	0.00898267	0.978352	AT1G13330	AHP2	Arabidopsis Hop2 homolog
Carubv10009293m.g	-1.77146	0.0176829	AT1G13340	0	Regulator of Vps4 activity in the MVB pathway protein
Carubv10010335m.g	-1.43843	1.57574e-10	AT1G13360	0	0
Carubv10010302m.g	0.413772	0.15393	AT1G13380	0	Protein of unknown function (DUF1218)
Carubv10010468m.g	1.79748	2.67149e-13	AT1G13390	0	0
Carubv10010898m.g	1.14889	0.35626	AT1G13400	JGL,NUB	C2H2 and C2HC zinc fingers superfamily protein
Carubv10008584m.g	0.77684	0.0208427	AT1G13410	0	Tetratricopeptide repeat (TPR)-like superfamily protein
Carubv10012325m.g	-1.26082	0.166665	AT1G13430	ATST4C,ST4C	sulfotransferase 4C
Carubv10009662m.g	0.560824	0.00563448	AT1G13440	GAPC-2,GAPC2	glyceraldehyde-3-phosphate dehydrogenase C2
Carubv10009313m.g	-0.544967	0.0250689	AT1G13450	0	Homeodomain-like superfamily protein
Carubv10008945m.g	-0.29019	0.16282	AT1G13460	0	Protein phosphatase 2A regulatory B subunit family protein
Carubv10012255m.g	7.55185	7.50793e-16	AT1G12855	0	F-box family protein
Carubv10009445m.g	-0.529259	NA	AT1G13470	0	Protein of unknown function (DUF1262)
Carubv10012231m.g	-0.0940458	NA	AT1G13480	0	Protein of unknown function (DUF1262)
Carubv10011246m.g	-0.529259	NA	AT1G13520	0	Protein of unknown function (DUF1262)
Carubv10011549m.g	0.0165095	0.985016	AT1G13530	0	Protein of unknown function (DUF1262)
Carubv10012504m.g	-0.818509	0.0431324	AT1G13540	0	Protein of unknown function (DUF1262)
Carubv10011634m.g	-0.389552	0.806726	AT1G13550	0	Protein of unknown function (DUF1262)
Carubv10011704m.g	-0.282563	0.194593	AT1G13560	AAPT1,ATAAPT1	aminoalcoholphosphotransferase 1
Carubv10009278m.g	-0.718747	0.0210467	AT1G13570	0	F-box/RNI-like superfamily protein
Carubv10010947m.g	-0.592455	0.015196	AT1G13580	LAG13	LAG1 longevity assurance homolog 3
Carubv10011693m.g	2.44739	2.04459e-11	AT1G13590	ATPSK1,PSK1	phytosulfokine 1 precursor
Carubv10011839m.g	-0.0867804	NA	AT1G13600	AtbZIP58,bZIP58	basic leucine-zipper 58
Carubv10011982m.g	5.97581	5.80241e-15	AT1G13605	0	0
Carubv10011972m.g	2.93011	1.79535e-16	AT1G13609	0	Defensin-like (DEFL) family protein
Carubv10011177m.g	-0.470954	NA	AT2G04032	ZIP7	zinc transporter 7 precursor
Carubv10011195m.g	0.385725	0.837834	AT1G13610	0	alpha/beta-Hydrolases superfamily protein
Carubv10010856m.g	0.441397	NA	AT1G13620	RGF2	0
Carubv10008310m.g	-0.236123	0.408943	AT1G13630	0	Tetratricopeptide repeat (TPR)-like superfamily protein
Carubv10009802m.g	-4.99501	6.91421e-09	AT1G13635	0	DNA glycosylase superfamily protein
Carubv10008594m.g	-0.836158	0.000174415	AT1G13640	0	Phosphatidylinositol 3- and 4-kinase family protein
Carubv10009590m.g	-0.483522	NA	AT2G03810	0	18S pre-ribosomal assembly protein gar2-related
Carubv10012096m.g	-0.47351	NA	AT5G43690	0	P-loop containing nucleoside triphosphate hydrolases superfamily protein
Carubv10010185m.g	0.304071	NA	AT1G13670	0	0
Carubv10011738m.g	2.20385	0.0784117	AT1G13680	0	PLC-like phosphodiesterases superfamily protein
Carubv10009460m.g	-0.20625	0.72873	AT1G11270	0	F-box and associated interaction domains-containing protein
Carubv10010435m.g	0.840444	0.00573033	AT1G13690	ATE1	ATPase E1
Carubv10010036m.g	-0.21953	NA	AT1G13700	PGL1	6-phosphogluconolactonase 1
Carubv10008872m.g	1.93394	0.0135621	AT1G13710	CYP78A5,KLU	cytochrome P450, family 78, subfamily A, polypeptide 5
Carubv10011148m.g	0.75957	0.0018466	AT1G13730	0	Nuclear transport factor 2 (NTF2) family protein with RNA binding (RRM-RBD-RNP motifs) domain
Carubv10009552m.g	-0.441185	0.164213	AT1G13740	AFP2	ABI five binding protein 2
Carubv10009181m.g	0.477078	0.0482405	AT1G13770	RUS3	Protein of unknown function, DUF647
Carubv10008414m.g	0.122818	0.626897	AT1G13790	0	XH/XS domain-containing protein
Carubv10008293m.g	0.953917	0.00149217	AT1G13800	0	Tetratricopeptide repeat (TPR)-like superfamily protein
Carubv10009613m.g	0.354508	0.315618	AT1G13810	0	Restriction endonuclease, type II-like superfamily protein
Carubv10009998m.g	0.647913	0.0459185	AT1G13820	0	alpha/beta-Hydrolases superfamily protein
Carubv10012551m.g	-0.470954	NA	AT1G13830	0	Carbohydrate-binding X8 domain superfamily protein
Carubv10008622m.g	-3.28195	5.41484e-17	AT1G13860	QUL1	QUASIMODO2 LIKE 1
Carubv10009863m.g	0.0433215	0.904515	AT1G13870	DRL1	calmodulin binding;purine nucleotide binding
Carubv10009267m.g	-0.173615	0.529959	AT1G13880	0	ELM2 domain-containing protein
Carubv10012302m.g	-1.47605	NA	AT1G13890	ATSNAP30,SNAP30	soluble N-ethylmaleimide-sensitive factor adaptor protein 30
Carubv10008535m.g	-2.16878	2.47978e-32	AT1G13900	0	Purple acid phosphatases superfamily protein
Carubv10009699m.g	0.747856	0.0186141	AT1G13910	0	Leucine-rich repeat (LRR) family protein
Carubv10010071m.g	0.0540066	0.976954	AT1G13920	0	Remorin family protein
Carubv10010793m.g	-0.470954	NA	0	0	0
Carubv10010521m.g	-0.796076	0.227453	AT1G13930	0	0
Carubv10008191m.g	-0.475972	0.0260684	AT1G13940	0	Plant protein of unknown function (DUF863)
Carubv10008859m.g	-0.165889	0.554571	AT1G13960	WRKY4	WRKY DNA-binding protein 4
Carubv10008911m.g	-0.363176	0.551179	AT1G13970	0	Protein of unknown function (DUF1336)
Carubv10011818m.g	-0.75376	7.89457e-05	AT1G13980	EMB30,GN,VAN7	sec7 domain-containing protein
Carubv10011044m.g	-0.249953	0.434829	AT1G13990	0	0
Carubv10009171m.g	0.0462908	0.91462	AT1G14000	VIK	VH1-interacting kinase
Carubv10010285m.g	-0.470954	NA	AT1G14010	0	emp24/gp25L/p24 family/GOLD family protein
Carubv10008919m.g	-0.825343	4.57494e-05	AT1G14020	0	O-fucosyltransferase family protein
Carubv10011125m.g	1.29687	0.00737167	AT1G14030	0	Rubisco methyltransferase family protein
Carubv10011174m.g	-1.50214	3.11473e-05	AT1G14040	0	EXS (ERD1/XPR1/SYG1) family protein
Carubv10010289m.g	2.42665	0.0101729	AT1G14048	0	GCK domain-containing protein
Carubv10011860m.g	0.650324	0.0169334	AT1G14060	0	GCK domain-containing protein
Carubv10008772m.g	0.181713	NA	AT1G14070	FUT7	fucosyltransferase 7
Carubv10011805m.g	7.84017	6.34027e-23	AT1G14080	ATFUT6,FUT6	fucosyltransferase 6
Carubv10008907m.g	5.39213	1.06359e-18	AT1G14100	FUT8	fucosyltransferase 8
Carubv10012502m.g	0.574456	NA	AT1G14120	0	2-oxoglutarate (2OG) and Fe(II)-dependent oxygenase superfamily protein
Carubv10009839m.g	0.991735	0.00154149	AT1G14130	0	2-oxoglutarate (2OG) and Fe(II)-dependent oxygenase superfamily protein
Carubv10009878m.g	-0.749642	0.000974378	AT1G14140	0	Mitochondrial substrate carrier family protein
Carubv10010358m.g	0.157406	0.906491	AT1G14150	PQL1,PQL2	PsbQ-like 2
Carubv10012228m.g	-0.471433	NA	AT1G14160	0	Uncharacterised protein family (UPF0497)
Carubv10009036m.g	-1.94696	2.49893e-16	AT1G14170	0	RNA-binding KH domain-containing protein
Carubv10009576m.g	-0.821832	7.23938e-05	AT1G14180	0	RING/U-box superfamily protein
Carubv10012338m.g	-0.471433	NA	AT4G10457	SCRL1	SCR-like 1
Carubv10008703m.g	0.694106	0.577632	AT1G14190	0	Glucose-methanol-choline (GMC) oxidoreductase family protein
Carubv10012348m.g	-0.470954	NA	AT1G14200	0	RING/U-box superfamily protein
Carubv10010475m.g	-0.470954	NA	AT1G14205	0	Ribosomal L18p/L5e family protein
Carubv10010110m.g	1.12119	0.508969	AT1G14210	0	Ribonuclease T2 family protein
Carubv10011861m.g	-0.00996146	NA	AT1G14220	0	Ribonuclease T2 family protein
Carubv10008956m.g	1.4534	2.66761e-09	AT1G14230	0	GDA1/CD39 nucleoside phosphatase family protein
Carubv10008986m.g	-0.747961	NA	AT1G14240	0	GDA1/CD39 nucleoside phosphatase family protein
Carubv10012202m.g	-0.427143	0.528095	AT1G14260	0	RING/FYVE/PHD zinc finger superfamily protein
Carubv10011314m.g	0.0522125	0.87712	AT1G14270	0	CAAX amino terminal protease family protein
Carubv10009104m.g	-3.75468	0.000732196	AT1G14280	PKS2	phytochrome kinase substrate 2
Carubv10010052m.g	-1.25059	4.01125e-09	AT1G14290	SBH2	sphingoid base hydroxylase 2
Carubv10010081m.g	-0.229599	0.441002	AT1G14310	0	Haloacid dehalogenase-like hydrolase (HAD) superfamily protein
Carubv10010247m.g	-0.467909	0.0292334	AT1G14320	RPL10,RPL10A,SAC52	Ribosomal protein L16p/L10e family protein
Carubv10009132m.g	-1.10317	9.96266e-11	AT1G14330	0	Galactose oxidase/kelch repeat superfamily protein
Carubv10010131m.g	0.328359	0.219607	AT1G14340	0	RNA-binding (RRM/RBD/RNP motifs) family protein
Carubv10011943m.g	1.15065	7.52465e-05	AT1G14345	0	NAD(P)-linked oxidoreductase superfamily protein
Carubv10011123m.g	0.754156	NA	AT1G09650	0	F-box and associated interaction domains-containing protein
Carubv10011707m.g	-2.50121	2.36889e-14	AT1G14350	AtMYB124,FLP,MYB124	Duplicated homeodomain-like superfamily protein
Carubv10011652m.g	0.379635	0.0635932	AT1G14360	ATUTR3,UTR3	UDP-galactose transporter 3
Carubv10009175m.g	-2.53203	0.0175538	AT1G14370	APK2A,PBL2	protein kinase 2A
Carubv10008540m.g	-0.0799246	0.942365	AT1G14380	IQD28	IQ-domain 28
Carubv10012614m.g	1.34603	0.0320517	AT1G14390	0	Leucine-rich repeat protein kinase family protein
Carubv10010548m.g	-0.722816	0.000263089	AT1G14400	ATUBC1,UBC1	ubiquitin carrier protein 1
Carubv10010024m.g	1.54547	1.51881e-10	AT1G14410	ATWHY1,PTAC1,WHY1	ssDNA-binding transcriptional regulator
Carubv10010727m.g	-0.3919	0.777253	0	0	0
Carubv10012514m.g	-2.54548	8.04098e-12	AT1G14420	AT59	Pectate lyase family protein
Carubv10011386m.g	-0.55503	0.401699	AT1G14430	0	glyoxal oxidase-related protein
Carubv10009782m.g	-0.83932	0.332342	AT1G14440	AtHB31,HB31	homeobox protein 31
Carubv10010789m.g	-0.144605	0.557605	AT1G14450	0	NADH dehydrogenase (ubiquinone)s
Carubv10011243m.g	2.58467	7.59938e-13	AT1G14455	0	0
Carubv10008136m.g	0.00206131	0.995251	AT1G14460	0	AAA-type ATPase family protein
Carubv10008784m.g	0.652428	0.173452	AT1G14470	0	Pentatricopeptide repeat (PPR) superfamily protein
Carubv10012557m.g	1.95508	2.59932e-05	AT1G14480	0	Ankyrin repeat family protein
Carubv10012073m.g	1.75655	0.000694608	AT5G49700	0	Predicted AT-hook DNA-binding family protein
Carubv10012665m.g	-1.14322	0.460542	AT1G14500	0	Ankyrin repeat family protein
Carubv10010091m.g	0.204798	0.389697	AT1G14510	AL7	alfin-like 7
Carubv10009854m.g	0.863329	0.00878514	AT1G14688	0	0
Carubv10011049m.g	-0.470954	NA	AT2G02220	ATPSKR1,PSKR1	phytosulfokin receptor 1
Carubv10010078m.g	1.29783	0.0375999	AT1G63900	0	E3 Ubiquitin ligase family protein
Carubv10010461m.g	-0.29562	0.728028	AT1G63900	0	E3 Ubiquitin ligase family protein
Carubv10009817m.g	2.2185	2.01294e-14	AT1G14520	MIOX1	myo-inositol oxygenase 1
Carubv10009846m.g	-0.543663	0.0862948	AT2G02180	TOM3	tobamovirus multiplication protein 3
Carubv10010887m.g	-0.0593993	NA	AT1G14540	0	Peroxidase superfamily protein
Carubv10012474m.g	-0.471433	NA	AT1G14550	0	Peroxidase superfamily protein
Carubv10009700m.g	-0.0557373	0.873966	AT1G14560	0	Mitochondrial substrate carrier family protein
Carubv10009052m.g	0.149982	0.5331	AT1G14570	0	UBX domain-containing protein
Carubv10009023m.g	1.02972	0.00122479	AT1G14580	0	C2H2-like zinc finger protein
Carubv10012680m.g	-0.470954	NA	0	0	0
Carubv10009437m.g	0.533643	0.0733682	AT1G14590	0	Nucleotide-diphospho-sugar transferase family protein
Carubv10010057m.g	0.0812396	0.950088	AT1G14600	0	Homeodomain-like superfamily protein
Carubv10011060m.g	0.124348	0.459871	AT1G14610	TWN2,VALRS	valyl-tRNA synthetase / valine--tRNA ligase (VALRS)
Carubv10012651m.g	0.767259	0.000312585	AT1G14620	DECOY	decoy
Carubv10010032m.g	2.11041	0.012349	AT1G14630	0	0
Carubv10011640m.g	0.426971	0.154522	AT1G14650	0	SWAP (Suppressor-of-White-APricot)/surp domain-containing protein / ubiquitin family protein
Carubv10008350m.g	-0.0167434	0.945912	AT1G14650	0	SWAP (Suppressor-of-White-APricot)/surp domain-containing protein / ubiquitin family protein
Carubv10011936m.g	1.0946	0.000931042	AT1G14660	ATNHX8,NHX8	Na+/H+ exchanger 8
Carubv10008657m.g	-1.97628	1.26333e-25	AT1G14670	0	Endomembrane protein 70 protein family
Carubv10009927m.g	0.215155	0.637421	AT1G14680	0	0
Carubv10009978m.g	-0.785335	4.4569e-05	AT1G14685	ATBPC2,BBR/BPC2,BPC2	basic pentacysteine 2
Carubv10011056m.g	0.180734	0.915327	AT1G14686	0	ENTH/ANTH/VHS superfamily protein
Carubv10010471m.g	-0.276689	0.473072	AT1G14687	AtHB32,HB32	homeobox protein 32
Carubv10012320m.g	0.757708	0.00472602	AT1G14690	MAP65-7	microtubule-associated protein 65-7
Carubv10008596m.g	-0.734537	5.2809e-05	AT1G14710	0	hydroxyproline-rich glycoprotein family protein
Carubv10009442m.g	0.674132	0.385768	AT1G14720	ATXTH28,EXGT-A2,XTH28,XTR2	xyloglucan endotransglucosylase/hydrolase 28
Carubv10010271m.g	1.03567	0.479395	AT1G14730	0	Cytochrome b561/ferric reductase transmembrane protein family
Carubv10008407m.g	-0.112985	0.688776	AT1G14740	0	Protein of unknown function (DUF1423)
Carubv10011369m.g	1.53865	0.212188	AT1G14315	0	F-box and associated interaction domains-containing protein
Carubv10010916m.g	0.4431	0.57349	AT1G14750	SDS	Cyclin family protein
Carubv10011088m.g	6.56036	1.0321e-36	AT1G14755	0	S locus-related glycoprotein 1 (SLR1) binding pollen coat protein family
Carubv10011432m.g	1.78261	0.197001	AT1G14760	KNATM	KNOX Arabidopsis thaliana meinox
Carubv10009280m.g	-0.742588	0.0128594	AT1G14770	0	RING/FYVE/PHD zinc finger superfamily protein
Carubv10008542m.g	0.132339	0.894176	AT1G14780	0	MAC/Perforin domain-containing protein
Carubv10008144m.g	-0.218646	0.438512	AT1G14790	ATRDRP1,RDR1	RNA-dependent RNA polymerase 1
Carubv10009340m.g	0.935335	2.7482e-05	AT1G14810	0	semialdehyde dehydrogenase family protein
Carubv10010095m.g	1.01128	0.000323251	AT1G14820	0	Sec14p-like phosphatidylinositol transfer family protein
Carubv10008553m.g	-1.54811	5.82289e-20	AT1G14830	ADL1C,ADL5,DL1C,DRP1C	DYNAMIN-like 1C
Carubv10008632m.g	0.288137	0.23367	AT1G14840	ATMAP70-4,MAP70-4	microtubule-associated proteins 70-4
Carubv10012399m.g	-0.174656	0.426363	AT1G14850	NUP155	nucleoporin 155
Carubv10010439m.g	0.649974	0.66725	AT1G14860	atnudt18,NUDT18	nudix hydrolase homolog 18
Carubv10010549m.g	3.59551	1.2744e-11	AT1G14870	PCR2	PLANT CADMIUM RESISTANCE 2
Carubv10010160m.g	-1.10815	0.0747174	AT1G14890	0	Plant invertase/pectin methylesterase inhibitor superfamily protein
Carubv10010056m.g	0.223935	0.452014	AT1G14900	HMGA	high mobility group A
Carubv10008396m.g	-0.348735	0.0760599	AT1G14910	0	ENTH/ANTH/VHS superfamily protein
Carubv10008833m.g	0.241401	0.416163	AT1G14920	GAI,RGA2	GRAS family transcription factor family protein
Carubv10011229m.g	-0.470954	NA	AT1G14940	0	Polyketide cyclase/dehydrase and lipid transport superfamily protein
Carubv10011506m.g	-0.470954	NA	AT1G14950	0	Polyketide cyclase/dehydrase and lipid transport superfamily protein
Carubv10011497m.g	-0.00610445	NA	AT1G30990	0	Polyketide cyclase/dehydrase and lipid transport superfamily protein
Carubv10008744m.g	-4.45685	NA	AT1G14970	0	O-fucosyltransferase family protein
Carubv10010732m.g	-0.624426	0.00305956	AT1G14980	CPN10	chaperonin 10
Carubv10010473m.g	0.503516	0.0936553	AT1G14990	0	0
Carubv10009146m.g	0.98347	0.0302778	AT1G15000	scpl50	serine carboxypeptidase-like 50
Carubv10010520m.g	1.01311	0.172416	AT1G15010	0	0
Carubv10008729m.g	0.154813	0.501197	AT1G15020	ATQSOX1,QSO2,QSOX1	quiescin-sulfhydryl oxidase 1
Carubv10009528m.g	-0.372103	0.174601	AT1G15030	0	Protein of unknown function (DUF789)
Carubv10011706m.g	2.50322	2.02496e-06	AT1G15040	0	Class I glutamine amidotransferase-like superfamily protein
Carubv10011905m.g	0.649231	0.285386	AT1G15050	IAA34	indole-3-acetic acid inducible 34
Carubv10012334m.g	0.728947	0.000866613	AT1G15060	0	Uncharacterised conserved protein UCP031088, alpha/beta hydrolase
Carubv10009800m.g	3.99271	2.97441e-31	AT1G15080	ATLPP2,ATPAP2,LPP2	lipid phosphate phosphatase 2
Carubv10010511m.g	-0.118782	0.774608	AT1G15100	RHA2A	RING-H2 finger A2A
Carubv10011550m.g	1.208	1.62374e-07	AT1G15110	0	phosphatidyl serine synthase family protein
Carubv10010817m.g	-0.256103	0.211409	AT1G15120	0	Ubiquinol-cytochrome C reductase hinge protein
Carubv10009591m.g	-0.0260512	0.985675	AT1G15125	0	S-adenosyl-L-methionine-dependent methyltransferases superfamily protein
Carubv10008299m.g	-0.240719	0.228826	AT1G15130	0	Endosomal targeting BRO1-like domain-containing protein
Carubv10009891m.g	-0.517052	0.029753	AT1G15140	0	FAD/NAD(P)-binding oxidoreductase
Carubv10011851m.g	1.25544	0.0565322	AT1G15160	0	MATE efflux family protein
Carubv10008971m.g	0.418031	0.0739191	AT1G15170	0	MATE efflux family protein
Carubv10010136m.g	1.9169	0.0127785	AT1G15190	0	Fasciclin-like arabinogalactan family protein
Carubv10011586m.g	-0.0146751	0.954618	AT1G15200	0	protein-protein interaction regulator family protein
Carubv10012050m.g	2.74029	8.587e-35	AT1G15210	ATPDR7,PDR7	pleiotropic drug resistance 7
Carubv10010379m.g	1.30636	7.48883e-05	AT1G15215	0	0
Carubv10010517m.g	-0.470954	NA	AT1G15220	ATCCMH,CCMH	cytochrome c biogenesis protein family
Carubv10011666m.g	-0.470954	NA	AT1G15230	0	0
Carubv10008179m.g	-0.60988	0.00266966	AT1G15240	0	Phox-associated domain;Phox-like;Sorting nexin, C-terminal
Carubv10011974m.g	-0.470954	NA	AT1G15250	0	Zinc-binding ribosomal protein family protein
Carubv10011308m.g	0.181536	0.738039	AT1G15260	0	0
Carubv10011034m.g	-0.1368	0.578503	AT1G15280	0	CASC3/Barentsz eIF4AIII binding
Carubv10011596m.g	0.615134	0.0060462	AT1G15290	0	Tetratricopeptide repeat (TPR)-like superfamily protein
Carubv10011179m.g	0.53091	0.00851762	AT3G42170	0	BED zinc finger ;hAT family dimerisation domain
Carubv10011752m.g	-0.227195	0.512128	AT1G15320	0	0
Carubv10011907m.g	-0.470954	NA	AT1G15330	0	Cystathionine beta-synthase (CBS) protein
Carubv10009517m.g	-0.028616	0.910937	AT1G15340	MBD10	methyl-CPG-binding domain 10
Carubv10011587m.g	0.381518	0.322648	AT1G15350	0	0
Carubv10010317m.g	-1.52065	NA	AT1G15360	SHN1,WIN1	Integrase-type DNA-binding superfamily protein
Carubv10010572m.g	-0.847446	1.21866e-05	AT1G15370	0	SNARE-like superfamily protein
Carubv10010450m.g	-0.38251	0.411976	AT1G15380	0	Lactoylglutathione lyase / glyoxalase I family protein
Carubv10012662m.g	1.52676	0.190779	AT1G15385	0	0
Carubv10011124m.g	0.475484	0.134458	AT1G15390	ATDEF1,PDF1A	peptide deformylase 1A
Carubv10010935m.g	0.370464	0.297634	AT1G15400	0	0
Carubv10009705m.g	-1.78417	4.28128e-08	AT1G15410	0	aspartate-glutamate racemase family
Carubv10011465m.g	0.524811	0.6449	AT1G15415	0	0
Carubv10009844m.g	0.596081	0.000721489	AT1G15420	0	0
Carubv10010051m.g	1.17011	1.81347e-06	AT1G15430	0	Protein of unknown function (DUF1644)
Carubv10008260m.g	0.176329	0.388181	AT1G15440	ATPWP2,PWP2	periodic tryptophan protein 2
Carubv10011515m.g	2.80696	2.16632e-28	AT1G15460	ATBOR4,BOR4	HCO3- transporter family
Carubv10009691m.g	-0.509349	0.00400325	AT1G15470	0	Transducin/WD40 repeat-like superfamily protein
Carubv10008643m.g	-0.358311	0.10087	AT1G15480	0	Tetratricopeptide repeat (TPR)-like superfamily protein
Carubv10008598m.g	0.469122	0.0344425	AT1G15500	ATNTT2	TLC ATP/ADP transporter
Carubv10012185m.g	-0.470954	NA	AT1G15510	ATECB2,ECB2,VAC1	Tetratricopeptide repeat (TPR)-like superfamily protein
Carubv10008103m.g	0.153086	0.805803	AT1G15520	ABCG40,ATABCG40,ATPDR12,PDR12	pleiotropic drug resistance 12
Carubv10012446m.g	-0.300114	0.205625	AT1G15530	0	Concanavalin A-like lectin protein kinase family protein
Carubv10011635m.g	1.50746	0.162246	AT1G15540	0	2-oxoglutarate (2OG) and Fe(II)-dependent oxygenase superfamily protein
Carubv10009532m.g	-3.77644	4.91083e-09	AT1G15550	ATGA3OX1,GA3OX1,GA4	gibberellin 3-oxidase 1
Carubv10009125m.g	0.228636	0.68358	AT1G15570	CYCA2;3	CYCLIN A2;3
Carubv10010519m.g	-0.470954	NA	AT1G15580	ATAUX2-27,AUX2-27,IAA5	indole-3-acetic acid inducible 5
Carubv10012253m.g	-0.470954	NA	AT1G15590	0	0
Carubv10012406m.g	-0.470954	NA	AT3G61180	0	RING/U-box superfamily protein
Carubv10012480m.g	-0.470954	NA	AT1G15600	0	0
Carubv10012391m.g	-0.893502	NA	AT1G15610	0	0
Carubv10012152m.g	-0.471403	NA	AT1G15620	0	0
Carubv10011228m.g	-0.470954	NA	AT1G15630	0	0
Carubv10010088m.g	-0.470954	NA	AT1G15620	0	0
Carubv10012088m.g	-1.07066	NA	AT1G15610	0	0
Carubv10012205m.g	-0.0853198	NA	AT1G80400	0	RING/U-box superfamily protein
Carubv10008413m.g	0.264884	0.24056	AT1G15660	CENP-C	centromere protein C
Carubv10009534m.g	-1.04123	0.0104308	AT1G15670	0	Galactose oxidase/kelch repeat superfamily protein
Carubv10008378m.g	-1.68277	3.24132e-14	AT1G15690	ATAVP3,AtVHP1;1,AVP-3,AVP1	Inorganic H pyrophosphatase family protein
Carubv10011380m.g	-0.470954	NA	AT1G15700	ATPC2	ATPase, F1 complex, gamma subunit protein
Carubv10011791m.g	-0.502002	NA	AT1G15720	TRFL5	TRF-like 5
Carubv10009134m.g	1.64038	8.12679e-09	AT1G15730	0	Cobalamin biosynthesis CobW-like protein
Carubv10010899m.g	-0.470954	NA	AT1G15740	0	Leucine-rich repeat family protein
Carubv10008139m.g	0.3842	0.0607839	AT1G15750	TPL,WSIP1	Transducin family protein / WD-40 repeat family protein
Carubv10012352m.g	4.57107	1.11029e-07	AT1G15757	0	Molecular chaperone Hsp40/DnaJ family protein
Carubv10012382m.g	-0.470954	NA	AT1G15760	0	Sterile alpha motif (SAM) domain-containing protein
Carubv10008730m.g	-1.40379	1.28522e-06	AT1G80530	0	Major facilitator superfamily protein
Carubv10012388m.g	0.962769	0.16022	AT1G15780	0	0
Carubv10008733m.g	-0.427457	0.275724	AT1G15780	0	0
Carubv10008096m.g	0.269226	0.194901	AT1G15780	0	0
Carubv10010293m.g	-0.446873	0.279677	AT1G15800	0	0
Carubv10012290m.g	-0.470954	NA	AT1G15810	0	S15/NS1, RNA-binding protein
Carubv10010058m.g	1.05753	0.000162359	AT1G15820	CP24,LHCB6	light harvesting complex photosystem II subunit 6
Carubv10011155m.g	0.210858	0.775212	AT1G15830	0	0
Carubv10010411m.g	0.821237	0.00500684	AT4G00420	0	Double-stranded RNA-binding domain (DsRBD)-containing protein
Carubv10010104m.g	0.0113414	0.961559	AT1G15860	0	Domain of unknown function (DUF298)
Carubv10012435m.g	0.433393	0.469335	AT1G15870	0	Mitochondrial glycoprotein family protein
Carubv10010239m.g	-0.360879	0.136472	AT1G15880	atgos11,GOS11	golgi snare 11
Carubv10012171m.g	-0.075015	0.93834	AT1G15890	0	Disease resistance protein (CC-NBS-LRR class) family
Carubv10011590m.g	-1.80142	0.00632468	AT1G15900	0	0
Carubv10008566m.g	-0.208954	0.306583	AT1G15910	0	XH/XS domain-containing protein
Carubv10009915m.g	0.0767685	0.778658	AT1G15920	0	Polynucleotidyl transferase, ribonuclease H-like superfamily protein
Carubv10010589m.g	0.511889	0.00728127	AT2G32060	0	Ribosomal protein L7Ae/L30e/S12e/Gadd45 family protein
Carubv10008168m.g	0.399548	0.0316871	AT1G15940	0	Tudor/PWWP/MBT superfamily protein
Carubv10009629m.g	0.919299	0.00010108	AT1G15950	ATCCR1,CCR1,IRX4	cinnamoyl coa reductase 1
Carubv10008854m.g	4.3901	1.89981e-53	AT1G15960	ATNRAMP6,NRAMP6	NRAMP metal ion transporter 6
Carubv10009599m.g	0.0313638	0.914259	AT1G15970	0	DNA glycosylase superfamily protein
Carubv10009072m.g	0.217791	0.565301	AT1G15980	NDF1,NDH48	NDH-dependent cyclic electron flow 1
Carubv10008459m.g	-2.35933	5.99722e-07	AT1G15990	ATCNGC7,CNGC7	cyclic nucleotide gated channel 7
Carubv10010772m.g	-0.256447	0.385976	AT1G16000	0	0
Carubv10010853m.g	-0.470954	NA	AT1G16010	MGT2,MRS2-1	magnesium transporter 2
Carubv10012180m.g	-0.882209	0.0539908	AT1G16020	0	Protein of unknown function (DUF1712)
Carubv10010659m.g	-0.48896	0.495986	AT1G16022	0	0
Carubv10012149m.g	0.0175405	0.96952	AT1G16030	Hsp70b	heat shock protein 70B
Carubv10010172m.g	0.545488	0.00765213	AT1G16040	0	0
Carubv10010918m.g	-0.12892	0.816393	AT1G16060	ADAP	ARIA-interacting double AP2 domain protein
Carubv10009355m.g	0.928172	0.116946	AT1G16070	AtTLP8,TLP8	tubby like protein 8
Carubv10009813m.g	1.06437	0.000336538	AT1G16080	0	0
Carubv10008430m.g	0.0746466	NA	AT1G16120	WAKL1	wall associated kinase-like 1
Carubv10008263m.g	1.38913	0.355646	AT1G16150	WAKL4	wall associated kinase-like 4
Carubv10009505m.g	0.327056	0.752442	AT1G16160	WAKL5	wall associated kinase-like 5
Carubv10010756m.g	-0.604056	0.00337385	AT1G79660	0	0
Carubv10009295m.g	-0.854759	1.0712e-05	AT1G16180	0	Serinc-domain containing serine and sphingolipid biosynthesis protein
Carubv10011879m.g	-0.409873	0.060494	AT1G16190	RAD23A	Rad23 UV excision repair protein family
Carubv10010180m.g	-0.382292	0.0692619	AT1G16210	0	0
Carubv10011374m.g	0.428362	0.596696	AT1G16220	0	Protein phosphatase 2C family protein
Carubv10010186m.g	-0.665363	0.000780497	AT1G16240	ATSYP51,SYP51	syntaxin of plants 51
Carubv10009433m.g	-0.313796	0.174626	AT1G16250	0	Galactose oxidase/kelch repeat superfamily protein
Carubv10011235m.g	-0.549057	NA	AT1G16260	0	Wall-associated kinase family protein
Carubv10008134m.g	-1.05956	1.87877e-07	AT1G16270	0	Protein kinase superfamily protein with octicosapeptide/Phox/Bem1p domain
Carubv10012273m.g	0.294028	0.229348	AT1G16280	AtRH36,RH36,SWA3	RNA helicase 36
Carubv10009260m.g	0.60263	0.0625057	AT1G16290	0	0
Carubv10009227m.g	-0.343805	0.10325	AT1G16300	GAPCP-2	glyceraldehyde-3-phosphate dehydrogenase of plastid 2
Carubv10009337m.g	-1.33753	0.00825263	AT1G16310	0	Cation efflux family protein
Carubv10009990m.g	0.215752	0.317963	AT1G16320	0	Uncharacterized conserved protein (DUF2358)
Carubv10012501m.g	0.143534	0.638357	AT1G16330	CYCB3;1	cyclin b3;1
Carubv10012219m.g	0.589123	0.0244423	AT1G16340	ATKDSA2,ATKSDA	Aldolase superfamily protein
Carubv10008910m.g	0.871699	7.4035e-05	AT1G16350	0	Aldolase-type TIM barrel family protein
Carubv10012317m.g	0.163388	NA	AT1G16360	0	LEM3 (ligand-effect modulator 3) family protein / CDC50 family protein
Carubv10011578m.g	5.26262	1.09082e-08	AT1G16370	ATOCT6,OCT6	organic cation/carnitine transporter 6
Carubv10011761m.g	-1.45378	NA	AT1G16380	ATCHX1,CHX1	Cation/hydrogen exchanger family protein
Carubv10011593m.g	3.05655	2.19384e-11	AT1G16390	3-Oct,ATOCT3	organic cation/carnitine transporter 3
Carubv10011470m.g	-3.90989	9.34004e-17	AT1G16410	BUS1,CYP79F1,SPS1	cytochrome p450 79f1
Carubv10010983m.g	-3.33188	2.7482e-05	AT1G16410	BUS1,CYP79F1,SPS1	cytochrome p450 79f1
Carubv10011040m.g	1.93109	0.2523	AT1G16420	ATMC8,MC8	metacaspase 8
Carubv10010555m.g	1.7405	8.21657e-05	AT1G07950	MED22B	Surfeit locus protein 5 subunit 22 of Mediator complex
Carubv10011491m.g	-0.686656	NA	AT1G16440	RSH3	root hair specific 3
Carubv10009502m.g	0.27172	0.191493	AT1G79230	ATMST1,ATRDH1,MST1,ST1,STR1	mercaptopyruvate sulfurtransferase 1
Carubv10010173m.g	0.412128	0.04486	AT1G16470	PAB1	proteasome subunit PAB1
Carubv10011798m.g	0.548386	0.0751659	AT1G16480	0	Tetratricopeptide repeat (TPR)-like superfamily protein
Carubv10011190m.g	0.625228	0.0832293	AT1G16490	ATMYB58,MYB58	myb domain protein 58
Carubv10008803m.g	-0.0593993	NA	AT5G28823	0	0
Carubv10010153m.g	0.30764	0.357901	AT1G16500	0	0
Carubv10011035m.g	-2.83536	6.0433e-08	AT1G16510	0	SAUR-like auxin-responsive protein family
Carubv10009722m.g	-0.473765	0.0293803	AT1G16520	0	0
Carubv10010749m.g	0.731846	0.543308	AT1G16530	ASL9,LBD3	ASYMMETRIC LEAVES 2-like 9
Carubv10011147m.g	-1.48303	2.0095e-09	AT1G16540	ABA3,ACI2,ATABA3,LOS5,SIR3	molybdenum cofactor sulfurase (LOS5) (ABA3)
Carubv10010913m.g	1.43358	6.75187e-07	AT3G01610	CDC48C,emb1354	cell division cycle 48C
Carubv10009543m.g	-0.0931896	NA	AT1G16560	0	Per1-like family protein
Carubv10008948m.g	-0.891754	0.000147938	AT1G16570	0	UDP-Glycosyltransferase superfamily protein
Carubv10010297m.g	0.320681	0.408028	AT1G16590	ATREV7,REV7	DNA-binding HORMA family protein
Carubv10008384m.g	1.091	0.231757	AT1G78960	ATLUP2,LUP2	lupeol synthase 2
Carubv10009275m.g	-0.349157	0.105187	AT1G16610	RNPS1,SR45	arginine/serine-rich 45
Carubv10008298m.g	-0.802474	0.00290423	AT1G16630	0	0
Carubv10012547m.g	0.618709	0.233845	AT1G16640	0	AP2/B3-like transcriptional factor family protein
Carubv10009211m.g	0.113047	0.78195	AT1G16650	0	S-adenosyl-L-methionine-dependent methyltransferases superfamily protein
Carubv10012041m.g	-0.502316	0.0440673	AT1G16670	0	Protein kinase superfamily protein
Carubv10008751m.g	-0.264735	0.230936	AT1G16680	0	Chaperone DnaJ-domain superfamily protein
Carubv10009354m.g	-0.906049	1.09729e-05	AT1G16690	0	Enhancer of polycomb-like transcription factor protein
Carubv10010241m.g	-0.216324	0.386847	AT1G16700	0	Alpha-helical ferredoxin
Carubv10010638m.g	0.573408	0.0474064	AT1G16705	0	p300/CBP acetyltransferase-related protein-related
Carubv10008082m.g	-0.0271362	0.907834	AT1G16710	HAC12	histone acetyltransferase of the CBP family 12
Carubv10008646m.g	0.199576	0.433515	AT1G16720	HCF173	high chlorophyll fluorescence phenotype 173
Carubv10012617m.g	-0.470954	NA	AT1G16730	UP6	unknown protein 6
Carubv10010647m.g	0.262192	0.346585	AT1G16740	0	Ribosomal protein L20
Carubv10008799m.g	-0.398029	NA	AT1G16750	0	Protein of unknown function, DUF547
Carubv10010903m.g	-0.0601845	NA	AT1G16760	0	Protein kinase protein with adenine nucleotide alpha hydrolases-like domain
Carubv10011789m.g	0.863848	0.474652	AT1G16770	0	0
Carubv10011947m.g	-0.470954	NA	AT1G16790	0	ribosomal protein-related
Carubv10008065m.g	-0.103196	0.698788	AT1G16800	0	P-loop containing nucleoside triphosphate hydrolases superfamily protein
Carubv10012679m.g	-0.0936351	0.757578	AT1G16810	0	0
Carubv10010539m.g	-1.4829	1.93393e-05	AT1G16825	0	Reticulon family protein
Carubv10008619m.g	0.24622	0.405438	AT1G16830	0	Pentatricopeptide repeat (PPR) superfamily protein
Carubv10010301m.g	-0.879393	0.000139673	AT1G16840	0	0
Carubv10010543m.g	-0.254425	0.642778	AT1G16850	0	0
Carubv10009033m.g	-2.16465	8.07682e-19	AT1G16860	0	Ubiquitin-specific protease family C19-related protein
Carubv10009019m.g	0.0226133	0.92613	AT1G16870	0	mitochondrial 28S ribosomal protein S29-related
Carubv10009908m.g	-0.610869	0.286955	AT1G16880	0	uridylyltransferase-related
Carubv10010547m.g	-0.126938	0.643147	AT1G16890	UBC13B,UBC36	ubiquitin-conjugating enzyme 36
Carubv10008626m.g	0.0445832	0.856443	AT1G16900	0	Alg9-like mannosyltransferase family
Carubv10010818m.g	0.234421	0.510681	AT1G16916	0	0
Carubv10010133m.g	0.0648144	0.819992	AT1G16920	ATRABA1B,RAB11,RABA1b	RAB GTPase homolog A1B
Carubv10009120m.g	0.0431062	0.899779	AT1G16930	0	F-box/RNI-like/FBD-like domains-containing protein
Carubv10012478m.g	0.478067	0.802254	AT1G16950	0	0
Carubv10010695m.g	-1.04366	NA	AT1G16960	0	Ubiquitin domain-containing protein
Carubv10008595m.g	1.54686	9.09008e-12	AT1G16970	ATKU70,KU70	KU70 homolog
Carubv10012173m.g	4.7068	2.2791e-38	AT1G16980	ATTPS2,TPS2	trehalose-phosphatase/synthase 2
Carubv10010858m.g	-0.31798	0.313835	AT1G17010	0	2-oxoglutarate (2OG) and Fe(II)-dependent oxygenase superfamily protein
Carubv10009827m.g	-0.854539	0.477447	AT1G17020	ATSRG1,SRG1	senescence-related gene 1
Carubv10008922m.g	-0.0274987	0.945096	AT1G17030	0	0
Carubv10011338m.g	0.487087	0.0165311	AT1G17040	ATSHA,SHA,STATLA	SH2 domain protein A
Carubv10009229m.g	0.38922	0.279652	AT1G17050	SPS2	solanesyl diphosphate synthase 2
Carubv10008841m.g	0.629573	0.0586435	AT1G17060	CYP72C1,SOB7	cytochrome p450 72c1
Carubv10012542m.g	-0.470954	NA	AT1G17070	0	GC-rich sequence DNA-binding factor-like protein with Tuftelin interacting domain
Carubv10010518m.g	-0.595367	0.00413475	AT1G17080	0	Ribosomal protein L18ae family
Carubv10011434m.g	0.522767	0.608655	AT1G17090	0	0
Carubv10010190m.g	0.310359	0.224757	AT1G17100	0	SOUL heme-binding family protein
Carubv10011568m.g	-0.343078	0.0810776	AT1G17110	UBP15	ubiquitin-specific protease 15
Carubv10008669m.g	-1.00559	5.29122e-06	AT1G17120	CAT8	cationic amino acid transporter 8
Carubv10009751m.g	-0.0645982	0.772141	AT1G17130	0	Family of unknown function (DUF572)
Carubv10009626m.g	-0.470954	NA	AT1G17140	ICR1,RIP1	interactor of constitutive active rops 1
Carubv10010828m.g	1.37198	0.306452	AT1G17145	0	RING/U-box superfamily protein
Carubv10010726m.g	-0.032923	0.978531	AT1G17147	0	VQ motif-containing protein
Carubv10011686m.g	5.87852	2.59121e-11	AT1G17150	0	Pectin lyase-like superfamily protein
Carubv10009429m.g	-0.169364	0.547527	AT1G17160	0	pfkB-like carbohydrate kinase family protein
Carubv10010098m.g	1.8015	0.115018	AT1G17170	ATGSTU24,GST,GSTU24	glutathione S-transferase TAU 24
Carubv10010257m.g	-1.95997	0.00063707	AT1G17180	ATGSTU25,GSTU25	glutathione S-transferase TAU 25
Carubv10010264m.g	-3.14783	8.91969e-53	AT1G17190	ATGSTU26,GSTU26	glutathione S-transferase tau 26
Carubv10010315m.g	-1.40888	4.91893e-13	AT1G17200	0	Uncharacterised protein family (UPF0497)
Carubv10011970m.g	0.344304	0.302011	AT1G17210	ATILP1,ILP1	IAP-like protein 1
Carubv10008177m.g	0.520087	0.0124091	AT1G17220	FUG1	Translation initiation factor 2, small GTP-binding protein
Carubv10008143m.g	0.859387	0.14037	AT1G17230	0	Leucine-rich receptor-like protein kinase family protein
Carubv10008225m.g	2.83321	4.97185e-43	AT1G17260	AHA10	autoinhibited H(+)-ATPase isoform 10
Carubv10010876m.g	3.45797	0.00291884	AT1G53750	RPT1A	regulatory particle triple-A 1A
Carubv10008696m.g	-0.367467	0.0738825	AT1G17270	0	O-fucosyltransferase family protein
Carubv10010163m.g	-0.568787	0.000952733	AT1G17280	UBC34	ubiquitin-conjugating enzyme 34
Carubv10011991m.g	-1.39583	0.376554	AT1G17285	0	0
Carubv10008780m.g	0.314936	0.198638	AT1G17290	AlaAT1	alanine aminotransferas
Carubv10011075m.g	-0.0933975	NA	AT1G17310	0	MADS-box transcription factor family protein
Carubv10010080m.g	2.68065	1.08663e-08	AT1G17330	0	Metal-dependent phosphohydrolase
Carubv10011400m.g	0.78773	0.000147171	AT1G17340	0	Phosphoinositide phosphatase family protein
Carubv10010944m.g	-1.02427	NA	AT1G17345	0	SAUR-like auxin-responsive protein family
Carubv10010222m.g	0.150459	0.608655	AT1G17350	0	NADH:ubiquinone oxidoreductase intermediate-associated protein 30
Carubv10008164m.g	-0.554091	0.165449	AT1G17360	0	0
Carubv10009263m.g	-0.435237	0.0249539	AT1G17370	UBP1B	oligouridylate binding protein 1B
Carubv10009758m.g	0.473707	0.334427	AT1G17380	JAZ5,TIFY11A	jasmonate-zim-domain protein 5
Carubv10009828m.g	-0.198822	NA	AT1G17400	0	0
Carubv10010406m.g	0.148079	0.612393	AT1G17410	0	Nucleoside diphosphate kinase family protein
Carubv10008244m.g	-0.961179	4.81901e-06	AT1G17420	LOX3	lipoxygenase 3
Carubv10009687m.g	-0.65421	0.0226585	AT1G17430	0	alpha/beta-Hydrolases superfamily protein
Carubv10008470m.g	-0.710674	0.0004706	AT1G17440	EER4,TAF12B	Transcription initiation factor TFIID subunit A
Carubv10008077m.g	-0.522632	0.00539675	AT1G17450	0	B-block binding subunit of TFIIIC
Carubv10011591m.g	-0.470954	NA	AT1G17455	ELF4-L4	ELF4-like 4
Carubv10012426m.g	1.31411	6.42112e-05	AT1G17460	TRFL3	TRF-like 3
Carubv10009345m.g	0.345756	0.0849662	AT1G17470	ATDRG,ATDRG1,DRG1	developmentally regulated G-protein 1
Carubv10012653m.g	-1.39151	0.206613	AT1G17480	IQD7	IQ-domain 7
Carubv10010545m.g	0.474857	0.0918702	AT1G17490	0	0
Carubv10008113m.g	-1.94809	1.2934e-10	AT1G17500	0	ATPase E1-E2 type family protein / haloacid dehalogenase-like hydrolase family protein
Carubv10010655m.g	-0.470954	NA	AT1G17510	0	0
Carubv10009890m.g	0.0197817	0.93657	AT1G17520	0	Homeodomain-like/winged-helix DNA-binding family protein
Carubv10012124m.g	-0.30366	0.444513	AT1G17530	ATTIM23-1,TIM23-1	translocase of inner mitochondrial membrane 23
Carubv10008461m.g	-1.77701	0.0221233	AT1G17540	0	Protein kinase protein with adenine nucleotide alpha hydrolases-like domain
Carubv10011883m.g	0.276061	NA	AT1G17550	HAB2	homology to ABI2
Carubv10009389m.g	-0.935822	3.70428e-05	AT1G17550	HAB2	homology to ABI2
Carubv10010419m.g	-0.401251	0.0954809	AT1G17560	HLL	Ribosomal protein L14p/L23e family protein
Carubv10011741m.g	-0.581158	0.000491941	AT1G17580	ATMYA1,MYA1,XI-1	myosin 1
Carubv10009470m.g	0.783414	0.66383	AT1G17615	0	Disease resistance protein (TIR-NBS class)
Carubv10010038m.g	-0.574323	0.0474064	AT1G17620	0	Late embryogenesis abundant (LEA) hydroxyproline-rich glycoprotein family
Carubv10011006m.g	0.454187	0.451296	AT1G17630	0	Pentatricopeptide repeat (PPR-like) superfamily protein
Carubv10012031m.g	-0.00193621	0.995537	AT1G17640	0	RNA-binding (RRM/RBD/RNP motifs) family protein
Carubv10011580m.g	1.12118	8.72437e-07	AT1G17650	GLYR2,GR2	glyoxylate reductase 2
Carubv10011678m.g	1.85542	1.15639e-10	AT1G17665	0	0
Carubv10008264m.g	0.226257	0.253499	AT1G17680	0	tetratricopeptide repeat (TPR)-containing protein
Carubv10012647m.g	0.494754	0.0220805	AT1G17690	NOF1	0
Carubv10011150m.g	0.861788	NA	AT1G17700	PRA1.F1	prenylated RAB acceptor 1.F1
Carubv10011086m.g	3.62887	1.5927e-18	AT1G17710	0	Pyridoxal phosphate phosphatase-related protein
Carubv10008904m.g	-0.56246	0.000318327	AT1G17720	ATB BETA	Protein phosphatase 2A, regulatory subunit PR55
Carubv10010323m.g	-0.266089	0.235451	AT1G17730	CHMP1B,VPS46.1	vacuolar protein sorting 46.1
Carubv10008585m.g	1.75409	1.74193e-17	AT1G17745	PGDH	D-3-phosphoglycerate dehydrogenase
Carubv10011893m.g	1.0041	0.000187822	AT1G17750	AtPEPR2,PEPR2	PEP1 receptor 2
Carubv10011584m.g	0.000478993	0.998528	AT1G17760	ATCSTF77,CSTF77	Tetratricopeptide repeat (TPR)-like superfamily protein
Carubv10011407m.g	3.56947	4.69774e-23	AT1G17770	SDG17,SUVH7	SU(VAR)3-9 homolog 7
Carubv10012112m.g	1.60015	1.21154e-17	AT1G17780	0	0
Carubv10009010m.g	-0.255894	0.323553	AT1G17790	0	DNA-binding bromodomain-containing protein
Carubv10011266m.g	6.97192	2.4263e-37	AT1G17800	AtENODL22,ENODL22	early nodulin-like protein 22
Carubv10012552m.g	1.6471	0.118452	AT1G17810	BETA-TIP	beta-tonoplast intrinsic protein
Carubv10008308m.g	-1.15249	6.56096e-10	AT1G17820	0	Putative integral membrane protein conserved region (DUF2404)
Carubv10009679m.g	1.36459	0.00389309	AT1G17830	0	Protein of unknown function (DUF789)
Carubv10008462m.g	-1.08521	9.16613e-07	AT1G17840	ABCG11,ATWBC11,COF1,DSO,WBC11	white-brown complex homolog protein 11
Carubv10010974m.g	-0.429112	0.318606	AT1G17850	0	Rhodanese/Cell cycle control phosphatase superfamily protein
Carubv10011616m.g	-0.0882249	0.81323	AT1G17860	0	Kunitz family trypsin and protease inhibitor protein
Carubv10011415m.g	0.490866	0.0716425	AT1G17870	ATEGY3,EGY3	ethylene-dependent gravitropism-deficient and yellow-green-like 3
Carubv10010502m.g	0.122118	0.517781	AT1G17880	ATBTF3,BTF3	basic transcription factor 3
Carubv10009714m.g	-0.518785	0.0137031	AT1G17890	GER2	NAD(P)-binding Rossmann-fold superfamily protein
Carubv10008485m.g	-1.94614	1.39133e-09	AT1G17920	HDG12	homeodomain GLABROUS 12
Carubv10009018m.g	0.435218	0.050898	AT1G17930	0	Aminotransferase-like, plant mobile domain family protein
Carubv10009322m.g	-0.148682	0.751314	AT1G17940	0	Endosomal targeting BRO1-like domain-containing protein
Carubv10012605m.g	-0.787511	NA	AT1G17950	ATMYB52,BW52,MYB52	myb domain protein 52
Carubv10008521m.g	3.00149	4.77671e-26	AT5G26830	0	Threonyl-tRNA synthetase
Carubv10009526m.g	-0.830772	0.000685188	AT1G17970	0	RING/U-box superfamily protein
Carubv10008394m.g	-0.197555	0.320603	AT1G17980	PAPS1	poly(A) polymerase 1
Carubv10009079m.g	-0.980794	0.159335	AT1G18010	0	Major facilitator superfamily protein
Carubv10012098m.g	-2.23107	0.000364886	AT1G76690	ATOPR2,OPR2	12-oxophytodienoate reductase 2
Carubv10011250m.g	-0.308935	0.312476	AT1G18030	0	Protein phosphatase 2C family protein
Carubv10011276m.g	-0.165836	0.516365	AT1G18040	AT;CDCKD;3,CAK2AT,CDKD1;3	cyclin-dependent kinase D1;3
Carubv10011009m.g	1.09467	0.00020793	AT1G18060	0	0
Carubv10008818m.g	-0.272636	0.135018	AT1G18070	0	Translation elongation factor EF1A/initiation factor IF2gamma family protein
Carubv10009720m.g	0.0152658	0.955345	AT1G18080	ATARCA,RACK1A,RACK1A_AT	Transducin/WD40 repeat-like superfamily protein
Carubv10008695m.g	0.337727	0.289844	AT1G18090	0	5\'-3\' exonuclease family protein
Carubv10011138m.g	-3.32819	3.3483e-23	AT1G18100	E12A11,MFT	PEBP (phosphatidylethanolamine-binding protein) family protein
Carubv10008683m.g	0.202824	0.774838	AT1G18140	ATLAC1,LAC1	laccase 1
Carubv10008665m.g	-0.690409	0.00113941	AT1G18150	ATMPK8	Protein kinase superfamily protein
Carubv10012038m.g	-0.924994	1.78892e-05	AT1G18160	0	Protein kinase superfamily protein
Carubv10011718m.g	0.265158	0.408235	AT1G18170	0	FKBP-like peptidyl-prolyl cis-trans isomerase family protein
Carubv10011252m.g	-0.648233	0.00100466	AT1G18190	GC2	golgin candidate 2
Carubv10011865m.g	1.95405	0.134492	AT1G18200	AtRABA6b,RABA6b	RAB GTPase homolog A6B
Carubv10010474m.g	-0.369063	0.102094	AT1G18210	0	Calcium-binding EF-hand family protein
Carubv10010135m.g	-0.183197	0.759359	AT1G18250	ATLP-1	Pathogenesis-related thaumatin superfamily protein
Carubv10008501m.g	-0.219257	0.226108	AT1G18260	0	HCP-like superfamily protein
Carubv10011169m.g	-0.674097	0.381141	AT1G18265	0	Protein of unknown function, DUF593
Carubv10011390m.g	-0.438703	0.0245732	AT1G18270	0	ketose-bisphosphate aldolase class-II family protein
Carubv10012497m.g	-0.0483804	0.972474	AT1G18280	0	Bifunctional inhibitor/lipid-transfer protein/seed storage 2S albumin superfamily protein
Carubv10010107m.g	0.33976	NA	AT1G18290	0	0
Carubv10010316m.g	-0.392822	0.687173	AT1G18300	atnudt4,NUDT4	nudix hydrolase homolog 4
Carubv10008525m.g	1.16643	0.39987	AT1G18310	0	glycosyl hydrolase family 81 protein
Carubv10010466m.g	-0.155897	0.688208	AT3G10110	MEE67	Mitochondrial import inner membrane translocase subunit Tim17/Tim22/Tim23 family protein
Carubv10009624m.g	-0.301286	0.434567	AT1G18330	EPR1,RVE7	Homeodomain-like superfamily protein
Carubv10010010m.g	-0.0360663	0.907353	AT1G18335	0	Acyl-CoA N-acyltransferases (NAT) superfamily protein
Carubv10009867m.g	-0.303729	0.205866	AT1G18340	0	basal transcription factor complex subunit-related
Carubv10011504m.g	-0.470954	NA	AT1G18350	ATMKK7,BUD1,MKK7	MAP kinase kinase 7
Carubv10009378m.g	-0.473459	0.062738	AT1G18360	0	alpha/beta-Hydrolases superfamily protein
Carubv10008207m.g	-1.62141	6.39836e-08	AT1G18370	ATNACK1,HIK,NACK1	ATP binding microtubule motor family protein
Carubv10008544m.g	-0.818795	0.0616295	AT1G18390	0	Protein kinase superfamily protein
Carubv10009894m.g	1.37573	0.23511	AT1G18400	BEE1	BR enhanced expression 1
Carubv10012358m.g	-1.01718	6.54136e-06	AT1G18410	0	P-loop containing nucleoside triphosphate hydrolases superfamily protein
Carubv10010911m.g	1.42838	0.162899	AT1G77180	SKIP	chromatin protein family
Carubv10011098m.g	4.4212	2.1487e-16	AT1G18450	ARP4,ATARP4	actin-related protein 4
Carubv10010729m.g	-0.53839	0.082081	0	0	0
Carubv10009940m.g	-0.527991	0.034506	AT1G18440	0	Peptidyl-tRNA hydrolase family protein
Carubv10009163m.g	0.745741	0.000182918	AT1G18450	ARP4,ATARP4	actin-related protein 4
Carubv10008464m.g	-0.495243	0.448367	AT1G18460	0	alpha/beta-Hydrolases superfamily protein
Carubv10009059m.g	-1.44298	0.000217894	AT1G18470	0	Transmembrane Fragile-X-F-associated protein
Carubv10010836m.g	-0.470954	NA	AT4G02655	0	0
Carubv10009776m.g	0.224388	0.440151	AT1G18490	0	Protein of unknown function (DUF1637)
Carubv10008887m.g	0.682485	0.00147497	AT1G18500	IPMS1,MAML-4	methylthioalkylmalate synthase-like 4
Carubv10011011m.g	0.167168	NA	AT1G18510	TET16	tetraspanin 16
Carubv10011030m.g	-5.45998	1.41558e-07	AT1G18520	TET11	tetraspanin11
Carubv10011170m.g	-1.29894	NA	AT1G18530	0	EF hand calcium-binding protein family
Carubv10010178m.g	0.426854	0.0332088	AT1G18540	0	Ribosomal protein L6 family protein
Carubv10008434m.g	-1.96403	2.84872e-07	AT1G18550	0	ATP binding microtubule motor family protein
Carubv10008481m.g	-0.0754024	0.779389	AT1G18560	0	BED zinc finger ;hAT family dimerisation domain
Carubv10009563m.g	-0.470954	NA	AT1G18570	AtMYB51,BW51A,BW51B,HIG1,MYB51	myb domain protein 51
Carubv10008800m.g	-1.86955	1.8614e-27	AT1G18580	GAUT11	galacturonosyltransferase 11
Carubv10012097m.g	-2.25113	2.2581e-08	AT1G18590	ATSOT17,ATST5C,SOT17	sulfotransferase 17
Carubv10009672m.g	0.0431053	0.855778	AT1G18600	ATRBL12,RBL12	RHOMBOID-like protein 12
Carubv10008756m.g	0.0981542	0.72501	AT1G18610	0	Galactose oxidase/kelch repeat superfamily protein
Carubv10008208m.g	0.494041	0.167101	AT1G18620	0	0
Carubv10010958m.g	0.244693	0.297347	AT1G18640	PSP	3-phosphoserine phosphatase
Carubv10012483m.g	-0.315074	0.461078	AT1G18650	PDCB3	plasmodesmata callose-binding protein 3
Carubv10008983m.g	0.225232	0.341222	AT1G18660	0	zinc finger (C3HC4-type RING finger) family protein
Carubv10008466m.g	0.683136	0.0353412	AT1G18670	IBS1	Protein kinase superfamily protein
Carubv10010393m.g	-0.0312564	0.949267	AT1G18680	0	HNH endonuclease domain-containing protein
Carubv10009116m.g	0.552594	0.306947	AT1G18690	0	Galactosyl transferase GMA12/MNN10 family protein
Carubv10012083m.g	0.343962	0.0322892	AT1G18700	0	DNAJ heat shock N-terminal domain-containing protein
Carubv10011014m.g	-0.00610445	NA	AT1G18710	AtMYB47,MYB47	myb domain protein 47
Carubv10010045m.g	-0.472408	NA	AT1G18710	AtMYB47,MYB47	myb domain protein 47
Carubv10010086m.g	-1.46675	NA	AT1G18710	AtMYB47,MYB47	myb domain protein 47
Carubv10010309m.g	-0.475953	0.0153477	AT1G18720	0	Protein of unknown function (DUF962)
Carubv10010440m.g	0.0864299	0.921454	AT1G18730	NDF6	NDH dependent flow 6
Carubv10009431m.g	0.306193	0.259015	AT1G18740	0	Protein of unknown function (DUF793)
Carubv10009419m.g	1.14949	0.0417372	AT1G18750	AGL65	AGAMOUS-like 65
Carubv10010970m.g	-0.0940458	NA	AT1G18760	0	Zinc finger, C3HC4 type (RING finger) family protein
Carubv10011027m.g	2.52536	0.00223615	AT1G18780	0	RING/U-box superfamily protein
Carubv10012572m.g	-0.470954	NA	AT3G13228	0	RING/U-box superfamily protein
Carubv10011133m.g	1.95312	0.177122	AT1G18790	0	RWP-RK domain-containing protein
Carubv10010235m.g	0.0995732	0.69173	AT1G18800	NRP2	NAP1-related protein 2
Carubv10011880m.g	-1.24523	NA	AT1G18810	0	phytochrome kinase substrate-related
Carubv10011773m.g	7.26628	1.41967e-13	AT1G18830	0	Transducin/WD40 repeat-like superfamily protein
Carubv10011804m.g	-0.0593993	NA	AT1G18835	MIF3	mini zinc finger
Carubv10008698m.g	-1.6685	5.78561e-15	AT1G18840	IQD30	IQ-domain 30
Carubv10009088m.g	0.575697	0.00409365	AT1G18850	0	0
Carubv10008977m.g	0.352788	NA	AT1G18860	ATWRKY61,WRKY61	WRKY DNA-binding protein 61
Carubv10008717m.g	-0.263699	0.634361	AT1G18870	ATICS2,ICS2	isochorismate synthase 2
Carubv10012216m.g	0.204152	0.614931	AT1G18880	0	Major facilitator superfamily protein
Carubv10008777m.g	-0.607017	0.00407856	AT1G18890	ATCDPK1,CDPK1,CPK10	calcium-dependent protein kinase 1
Carubv10008274m.g	-0.470954	NA	AT1G18900	0	Pentatricopeptide repeat (PPR) superfamily protein
Carubv10008101m.g	-0.609188	0.206018	AT1G18910	0	zinc ion binding;zinc ion binding
Carubv10008700m.g	0.779164	0.159652	AT1G18940	0	Nodulin-like / Major Facilitator Superfamily protein
Carubv10012346m.g	-0.410902	0.0537723	AT1G18950	0	DDT domain superfamily
Carubv10012671m.g	-0.190599	0.912678	AT1G18960	0	myb-like HTH transcriptional regulator family protein
Carubv10011931m.g	-0.470954	NA	AT1G18970	GLP4	germin-like protein 4
Carubv10011952m.g	-0.470954	NA	AT1G18980	0	RmlC-like cupins superfamily protein
Carubv10011395m.g	-1.08316	0.257158	AT1G18990	0	Protein of unknown function, DUF593
Carubv10011841m.g	0.68453	0.00935882	AT1G19000	0	Homeodomain-like superfamily protein
Carubv10009495m.g	0.895985	0.010234	AT1G19010	0	0
Carubv10010768m.g	0.0702865	0.965777	AT1G19020	0	0
Carubv10008764m.g	-0.0321393	0.919742	AT1G19025	0	DNA repair metallo-beta-lactamase family protein
Carubv10010295m.g	-1.54613	1.17691e-07	AT1G19050	ARR7	response regulator 7
Carubv10009244m.g	0.90482	0.0321648	AT4G22280	0	F-box/RNI-like superfamily protein
Carubv10012064m.g	-0.471403	NA	AT1G19086	0	0
Carubv10008603m.g	-1.00663	0.00476957	AT1G19090	CRK1,RKF2	receptor-like serine/threonine kinase 2
Carubv10008534m.g	0.754375	0.000137813	AT1G19100	0	Histidine kinase-, DNA gyrase B-, and HSP90-like ATPase family protein
Carubv10008355m.g	-0.310866	0.0523939	AT1G19110	0	inter-alpha-trypsin inhibitor heavy chain-related
Carubv10012380m.g	-1.10391	0.483789	AT1G19115	0	0
Carubv10010639m.g	-0.728668	NA	AT1G19120	0	Small nuclear ribonucleoprotein family protein
Carubv10010381m.g	-0.491034	NA	AT1G19130	0	0
Carubv10009536m.g	0.478137	0.0686163	AT1G19140	0	0
Carubv10012387m.g	0.796339	0.134882	AT1G19150	LHCA2*1,LHCA6	photosystem I light harvesting complex gene 6
Carubv10011469m.g	-0.922996	0.000246469	AT1G19170	0	Pectin lyase-like superfamily protein
Carubv10010018m.g	-1.63346	3.01858e-13	AT1G19180	JAZ1,TIFY10A	jasmonate-zim-domain protein 1
Carubv10011394m.g	-0.0433796	0.982436	AT1G19210	0	Integrase-type DNA-binding superfamily protein
Carubv10008159m.g	0.668972	0.166561	AT1G19220	ARF11,ARF19,IAA22	auxin response factor 19
Carubv10008247m.g	-1.311	0.00144713	AT1G19230	0	Riboflavin synthase-like superfamily protein
Carubv10010715m.g	0.650421	0.0708828	AT1G19240	0	0
Carubv10008834m.g	-2.83965	0.0724333	AT1G19250	FMO1	flavin-dependent monooxygenase 1
Carubv10008814m.g	0.0754569	0.812295	AT1G74960	ATKAS2,FAB1,KAS2	fatty acid biosynthesis 1
Carubv10008839m.g	-0.0995591	0.699011	AT1G19270	DA1	DA1
Carubv10008259m.g	1.01802	1.79934e-05	AT1G19290	0	Pentatricopeptide repeat (PPR) superfamily protein
Carubv10012618m.g	-0.691995	0.105832	AT1G19300	ATGATL1,GATL1,GLZ1,PARVUS	Nucleotide-diphospho-sugar transferases superfamily protein
Carubv10010212m.g	0.0950558	0.739994	AT1G19310	0	RING/U-box superfamily protein
Carubv10012596m.g	-2.43679	8.28456e-09	AT1G19320	0	Pathogenesis-related thaumatin superfamily protein
Carubv10010116m.g	-0.458054	0.073325	AT1G19330	0	0
Carubv10009255m.g	1.21516	9.99972e-07	AT1G19340	0	Methyltransferase MT-A70 family protein
Carubv10009520m.g	-1.35893	4.44334e-08	AT1G19350	BES1,BZR2	Brassinosteroid signalling positive regulator (BZR1) family protein
Carubv10011112m.g	-0.470954	NA	AT1G19360	0	Nucleotide-diphospho-sugar transferase family protein
Carubv10012465m.g	-0.357708	0.173471	AT1G19370	0	0
Carubv10010542m.g	0.246916	0.563821	AT1G19380	0	Protein of unknown function (DUF1195)
Carubv10011311m.g	0.845857	NA	AT1G19390	0	Wall-associated kinase family protein
Carubv10009862m.g	-0.823918	0.0861577	AT1G19400	0	Erythronate-4-phosphate dehydrogenase family protein
Carubv10008443m.g	-0.809376	0.00031514	AT1G19430	0	S-adenosyl-L-methionine-dependent methyltransferases superfamily protein
Carubv10011929m.g	-1.16257	2.45467e-11	AT1G19440	KCS4	3-ketoacyl-CoA synthase 4
Carubv10012080m.g	-2.37432	9.38631e-38	AT1G19450	0	Major facilitator superfamily protein
Carubv10011352m.g	-0.81432	0.355271	AT1G19460	0	Galactose oxidase/kelch repeat superfamily protein
Carubv10009489m.g	-0.295034	0.236536	AT1G19480	0	DNA glycosylase superfamily protein
Carubv10010997m.g	0.494451	0.0208076	AT1G19485	0	Transducin/WD40 repeat-like superfamily protein
Carubv10011417m.g	0.0641061	0.867633	AT1G19490	0	Basic-leucine zipper (bZIP) transcription factor family protein
Carubv10012246m.g	-0.456409	0.814727	AT1G19500	0	0
Carubv10010724m.g	-1.71039	0.140054	AT1G19510	ATRL5,RL5,RSM4	RAD-like 5
Carubv10008438m.g	-0.0336437	0.892605	AT1G19520	NFD5	pentatricopeptide (PPR) repeat-containing protein
Carubv10010689m.g	-1.26996	0.269434	AT1G19530	0	0
Carubv10012117m.g	-0.470954	NA	AT1G19540	0	NmrA-like negative transcriptional regulator family protein
Carubv10010286m.g	0.495897	0.129731	AT1G19570	ATDHAR1,DHAR1,DHAR5	dehydroascorbate reductase
Carubv10009987m.g	0.281513	0.200791	AT1G19580	GAMMA CA1	gamma carbonic anhydrase 1
Carubv10009566m.g	1.43419	2.48475e-09	AT1G19600	0	pfkB-like carbohydrate kinase family protein
Carubv10010796m.g	-1.39927	0.371245	AT1G19610	LCR78,PDF1.4	Arabidopsis defensin-like protein
Carubv10009793m.g	0.509712	NA	AT1G19620	0	0
Carubv10009004m.g	1.65673	0.00632468	AT1G19630	CYP722A1	cytochrome P450, family 722, subfamily A, polypeptide 1
Carubv10009402m.g	-2.30344	1.32972e-29	AT1G19640	JMT	jasmonic acid carboxyl methyltransferase
Carubv10012422m.g	-1.26932	0.00163142	AT1G19650	0	Sec14p-like phosphatidylinositol transfer family protein
Carubv10012529m.g	0.786857	0.00563721	AT1G19660	0	Wound-responsive family protein
Carubv10009755m.g	-1.0702	0.155014	AT1G19670	ATCLH1,ATHCOR1,CLH1,CORI1	chlorophyllase 1
Carubv10009094m.g	0.976784	1.3217e-06	AT1G19680	0	RING/U-box superfamily protein
Carubv10012174m.g	0.700061	0.0400845	AT1G19690	0	NAD(P)-binding Rossmann-fold superfamily protein
Carubv10008805m.g	-1.26028	2.06667e-10	AT1G19700	BEL10,BLH10	BEL1-like homeodomain 10
Carubv10011399m.g	-0.398307	0.0417145	AT1G19710	0	UDP-Glycosyltransferase superfamily protein
Carubv10012347m.g	1.45485	4.51069e-08	AT1G19720	0	Pentatricopeptide repeat (PPR-like) superfamily protein
Carubv10010677m.g	0.88333	0.0070098	AT1G19730	ATH4,ATTRX4	Thioredoxin superfamily protein
Carubv10009375m.g	0.508541	0.0147109	AT1G19770	ATPUP14,PUP14	purine permease 14
Carubv10009477m.g	-0.315382	NA	AT1G19770	ATPUP14,PUP14	purine permease 14
Carubv10009551m.g	1.71271	0.283458	AT1G19790	SRS7	SHI-related sequence 7
Carubv10009585m.g	0.272948	0.272794	AT1G19800	TGD1	trigalactosyldiacylglycerol 1
Carubv10010680m.g	1.24482	0.0549626	AT1G19830	0	SAUR-like auxin-responsive protein family
Carubv10008199m.g	0.152208	0.527277	AT1G19835	0	Plant protein of unknown function (DUF869)
Carubv10010532m.g	-0.950093	0.0202301	AT1G19840	0	SAUR-like auxin-responsive protein family
Carubv10010721m.g	-0.0110118	NA	AT3G21290	0	dentin sialophosphoprotein-related
Carubv10011118m.g	3.13414	0.0152227	AT3G11800	0	0
Carubv10008258m.g	0.626618	0.00239949	AT1G19850	ARF5,IAA24,MP	Transcriptional factor B3 family protein / auxin-responsive factor AUX/IAA-related
Carubv10009292m.g	-0.512153	0.0281252	AT1G19860	0	Zinc finger C-x8-C-x5-C-x3-H type family protein
Carubv10008346m.g	-1.12659	1.06764e-13	AT1G19870	iqd32	IQ-domain 32
Carubv10011521m.g	-1.01419	3.40555e-09	AT1G19880	0	Regulator of chromosome condensation (RCC1) family protein
Carubv10010862m.g	-0.0421066	NA	AT1G19890	ATMGH3,MGH3	male-gamete-specific histone H3
Carubv10012343m.g	-4.77628	1.74716e-25	AT1G19900	0	glyoxal oxidase-related protein
Carubv10010325m.g	-0.709611	0.0228271	AT1G19910	ATVHA-C2,AVA-2PE,AVA-P2	ATPase, F0/V0 complex, subunit C protein
Carubv10009002m.g	0.930726	0.000389991	AT1G19920	APS2,ASA1	Pseudouridine synthase/archaeosine transglycosylase-like family protein
Carubv10008868m.g	-3.17837	7.28611e-26	AT1G19940	AtGH9B5,GH9B5	glycosyl hydrolase 9B5
Carubv10009826m.g	-1.49588	3.73245e-12	AT1G19950	HVA22H	HVA22-like protein H (ATHVA22H)
Carubv10012472m.g	-0.470954	NA	AT1G75717	0	0
Carubv10010001m.g	-2.73697	1.22471e-22	AT1G19970	0	ER lumen protein retaining receptor family protein
Carubv10010151m.g	0.0744525	0.800179	AT1G19980	0	cytomatrix protein-related
Carubv10009729m.g	0.0547166	0.827703	AT1G19990	0	0
Carubv10012477m.g	-0.212506	NA	AT5G48110	0	Terpenoid cyclases/Protein prenyltransferases superfamily protein
Carubv10009114m.g	-2.22736	0.0177481	AT1G20010	TUB5	tubulin beta-5 chain
Carubv10011511m.g	0.558316	0.0299276	AT1G20020	ATLFNR2,FNR2	ferredoxin-NADP(+)-oxidoreductase 2
Carubv10011588m.g	-1.54559	2.38192e-07	AT1G20030	0	Pathogenesis-related thaumatin superfamily protein
Carubv10010245m.g	-0.159791	0.457967	AT1G20050	HYD1	C-8,7 sterol isomerase
Carubv10008857m.g	1.23228	0.0419571	AT5G26830	0	Threonyl-tRNA synthetase
Carubv10008283m.g	0.477178	0.17638	AT1G20060	0	ATP binding microtubule motor family protein
Carubv10010355m.g	1.12327	0.0417269	AT1G20070	0	0
Carubv10011202m.g	-2.0033	0.189573	AT1G20080	ATSYTB,NTMC2T1.2,NTMC2TYPE1.2,SYT2,SYTB	Calcium-dependent lipid-binding (CaLB domain) family protein
Carubv10010350m.g	-0.622209	0.0162177	AT1G20090	ARAC4,ATRAC4,ATROP2,ROP2	RHO-related protein from plants 2
Carubv10009911m.g	0.261313	0.153907	AT1G20100	0	0
Carubv10008630m.g	-0.452511	0.0105061	AT1G20110	0	RING/FYVE/PHD zinc finger superfamily protein
Carubv10012178m.g	1.08643	NA	AT1G20120	0	GDSL-like Lipase/Acylhydrolase superfamily protein
Carubv10011073m.g	-0.00610445	NA	AT1G20130	0	GDSL-like Lipase/Acylhydrolase superfamily protein
Carubv10011033m.g	0.742952	0.609991	AT1G20132	0	GDSL-like Lipase/Acylhydrolase superfamily protein
Carubv10012369m.g	0.25964	NA	AT1G20135	0	GDSL-like Lipase/Acylhydrolase family protein
Carubv10011271m.g	1.32715	0.352594	AT1G20150	0	Subtilisin-like serine endopeptidase family protein
Carubv10008367m.g	2.00008	7.46237e-07	AT1G20160	ATSBT5.2	Subtilisin-like serine endopeptidase family protein
Carubv10009395m.g	2.58893	0.0625027	AT1G20180	0	Protein of unknown function (DUF677)
Carubv10010090m.g	1.27939	0.00838638	AT1G20190	ATEXP11,ATEXPA11,ATHEXP ALPHA 1.14,EXP11,EXPA11	expansin 11
Carubv10008972m.g	0.124503	0.56396	AT1G20200	EMB2719,HAP15	PAM domain (PCI/PINT associated module) protein
Carubv10009820m.g	0.350881	0.0941347	AT1G20220	0	Alba DNA/RNA-binding protein
Carubv10010092m.g	0.260512	0.292283	AT1G20225	0	Thioredoxin superfamily protein
Carubv10008385m.g	1.22975	0.000680907	AT1G20230	0	Pentatricopeptide repeat (PPR) superfamily protein
Carubv10012521m.g	4.0478	2.83042e-31	AT1G20940	0	F-box family protein
Carubv10008979m.g	-0.691739	0.00205508	AT1G20260	0	ATPase, V1 complex, subunit B protein
Carubv10009921m.g	0.873078	0.000381377	AT1G20270	0	2-oxoglutarate (2OG) and Fe(II)-dependent oxygenase superfamily protein
Carubv10011494m.g	0.289107	0.253582	AT1G20300	0	Pentatricopeptide repeat (PPR) superfamily protein
Carubv10010139m.g	-0.200975	NA	AT1G20310	0	0
Carubv10012534m.g	-1.86943	NA	AT1G20320	0	Haloacid dehalogenase-like hydrolase (HAD) superfamily protein
Carubv10011566m.g	1.32517	6.15981e-15	AT1G20330	CVP1,FRL1,SMT2	sterol methyltransferase 2
Carubv10008779m.g	0.253324	0.440024	AT1G18070	0	Translation elongation factor EF1A/initiation factor IF2gamma family protein
Carubv10012022m.g	2.04701	2.45352e-11	AT1G20340	DRT112,PETE2	Cupredoxin superfamily protein
Carubv10010213m.g	3.13661	3.67734e-07	AT1G20350	ATTIM17-1,TIM17-1	translocase inner membrane subunit 17-1
Carubv10011862m.g	-1.95759	0.000909596	AT1G21860	sks7	SKU5 similar 7
Carubv10008701m.g	0.272249	0.132496	AT1G20370	0	Pseudouridine synthase family protein
Carubv10008428m.g	-0.0196925	0.965976	AT1G20380	0	Prolyl oligopeptidase family protein
Carubv10008914m.g	0.45149	0.0606711	AT1G20410	0	Pseudouridine synthase family protein
Carubv10011343m.g	0.148357	0.592025	AT1G20430	0	0
Carubv10010040m.g	0.234847	0.616756	AT1G20440	AtCOR47,COR47,RD17	cold-regulated 47
Carubv10010037m.g	-0.0834074	0.834863	AT1G20450	ERD10,LTI29,LTI45	Dehydrin family protein
Carubv10010710m.g	-0.302936	0.344483	AT1G20460	0	0
Carubv10011671m.g	-0.470954	NA	AT1G20470	0	SAUR-like auxin-responsive protein family
Carubv10008735m.g	0.28313	0.302513	AT1G20480	0	AMP-dependent synthetase and ligase family protein
Carubv10008755m.g	-1.50854	0.197555	AT1G20500	0	AMP-dependent synthetase and ligase family protein
Carubv10012648m.g	-0.470954	NA	AT5G38120	4CL8	AMP-dependent synthetase and ligase family protein
Carubv10008763m.g	-0.0835928	0.80623	AT1G20510	OPCL1	OPC-8:0 CoA ligase1
Carubv10012650m.g	-0.470954	NA	AT1G20520	0	Arabidopsis protein of unknown function (DUF241)
Carubv10008623m.g	0.494235	0.477148	AT1G20530	0	Protein of unknown function (DUF630 and DUF632)
Carubv10009593m.g	-0.12588	0.578523	AT1G20540	0	Transducin/WD40 repeat-like superfamily protein
Carubv10008720m.g	0.784184	0.00367366	AT1G20550	0	O-fucosyltransferase family protein
Carubv10011463m.g	-0.533184	0.0894513	AT1G20560	AAE1	acyl activating enzyme 1
Carubv10011863m.g	0.501287	0.0222802	AT1G80260	emb1427	Spc97 / Spc98 family of spindle pole body (SBP) component
Carubv10010118m.g	-0.395878	0.0948371	AT1G20575	0	Nucleotide-diphospho-sugar transferases superfamily protein
Carubv10010633m.g	0.301996	0.184577	AT1G20580	0	Small nuclear ribonucleoprotein family protein
Carubv10009205m.g	0.428736	0.101989	AT1G20610	CYCB2;3	Cyclin B2;3
Carubv10012481m.g	-1.56791	0.0216299	AT1G20620	ATCAT3,CAT3,SEN2	catalase 3
Carubv10012491m.g	0.0605817	0.821537	AT1G20630	CAT1	catalase 1
Carubv10008300m.g	-0.0422582	0.920171	AT1G20640	0	Plant regulator RWP-RK family protein
Carubv10011749m.g	0.292153	0.732899	AT1G20650	0	Protein kinase superfamily protein
Carubv10008487m.g	-0.59831	0.00930239	AT1G20670	0	DNA-binding bromodomain-containing protein
Carubv10010586m.g	-0.39714	0.0238685	AT1G20693	HMG BETA 1,HMGB2,NFD02,NFD2	high mobility group B2
Carubv10012681m.g	-0.509424	0.00865495	AT1G20696	HMGB3,NFD03,NFD3	high mobility group B3
Carubv10010349m.g	0.832531	0.447	AT1G20700	ATWOX14,WOX14	WUSCHEL related homeobox 14
Carubv10012447m.g	-0.470954	NA	AT1G20700	ATWOX14,WOX14	WUSCHEL related homeobox 14
Carubv10008105m.g	0.973113	3.60412e-05	AT1G20720	0	RAD3-like DNA-binding helicase protein
Carubv10011496m.g	0.451078	0.365754	AT1G20750	0	RAD3-like DNA-binding helicase protein
Carubv10008174m.g	-1.17306	8.64219e-13	AT1G20760	0	Calcium-binding EF hand family protein
Carubv10010125m.g	-0.470954	NA	AT1G20770	0	0
Carubv10008332m.g	-0.14517	0.616048	AT1G20780	ATPUB44,PUB44,SAUL1	senescence-associated E3 ubiquitin ligase 1
Carubv10011337m.g	-0.471403	NA	AT1G57580	0	F-box family protein
Carubv10012220m.g	1.63652	7.67203e-08	AT1G20800	0	F-box family protein
Carubv10010195m.g	1.00454	0.000115929	AT1G20810	0	FKBP-like peptidyl-prolyl cis-trans isomerase family protein
Carubv10010488m.g	0.396438	0.203302	AT1G20816	0	0
Carubv10010177m.g	-1.93012	1.17005e-26	AT1G20823	0	RING/U-box superfamily protein
Carubv10009608m.g	-0.471469	NA	AT1G20830	MCD1	multiple chloroplast division site 1
Carubv10008415m.g	-0.473162	0.619802	AT1G20840	TMT1	tonoplast monosaccharide transporter1
Carubv10009557m.g	-3.20257	7.21504e-13	AT1G20850	XCP2	xylem cysteine peptidase 2
Carubv10011524m.g	0.53462	NA	AT1G20860	PHT1;8	phosphate transporter 1;8
Carubv10009051m.g	0.492998	0.0981913	AT1G20870	0	HSP20-like chaperones superfamily protein
Carubv10009992m.g	-1.54073	6.62884e-13	AT1G20880	0	RNA-binding (RRM/RBD/RNP motifs) family protein
Carubv10010341m.g	-0.610749	0.0194181	AT1G20890	0	0
Carubv10009773m.g	-1.72517	9.95807e-06	AT1G20900	AHL27,ESC,ORE7	Predicted AT-hook DNA-binding family protein
Carubv10009301m.g	-0.289774	0.255731	AT1G20910	0	ARID/BRIGHT DNA-binding domain-containing protein
Carubv10008128m.g	-0.67049	0.00050153	AT1G20920	0	P-loop containing nucleoside triphosphate hydrolases superfamily protein
Carubv10012230m.g	1.04845	0.455902	AT1G20925	0	Auxin efflux carrier family protein
Carubv10009794m.g	1.32712	7.68969e-11	AT1G20930	CDKB2;2	cyclin-dependent kinase B2;2
Carubv10008559m.g	-0.11077	0.727662	AT1G20950	0	Phosphofructokinase family protein
Carubv10008066m.g	0.291457	0.13111	AT1G20960	emb1507	U5 small nuclear ribonucleoprotein helicase, putative
Carubv10008095m.g	-0.521516	0.000555538	AT1G20970	0	0
Carubv10012577m.g	-0.99905	2.04768e-08	AT1G20980	ATSPL14,FBR6,SPL14,SPL1R2	squamosa promoter binding protein-like 14
Carubv10008169m.g	-0.618208	0.00352915	AT1G20980	ATSPL14,FBR6,SPL14,SPL1R2	squamosa promoter binding protein-like 14
Carubv10009771m.g	-0.00754981	NA	AT1G20990	0	Cysteine/Histidine-rich C1 domain family protein
Carubv10009696m.g	0.20914	0.664928	AT1G21000	0	PLATZ transcription factor family protein
Carubv10009886m.g	-3.43361	5.67425e-22	AT1G21010	0	0
Carubv10010083m.g	0.488767	0.536442	AT1G21050	0	Protein of unknown function, DUF617
Carubv10012153m.g	0.883048	0.00512277	AT1G21060	0	Protein of unknown function, DUF547
Carubv10011090m.g	0.773562	0.0075508	AT1G21065	0	0
Carubv10009605m.g	-2.96592	6.66936e-19	AT1G21070	0	Nucleotide-sugar transporter family protein
Carubv10009386m.g	-0.612441	0.000461516	AT1G21080	0	DNAJ heat shock N-terminal domain-containing protein
Carubv10010147m.g	0.589953	0.141801	AT1G21090	0	Cupredoxin superfamily protein
Carubv10011795m.g	-0.471403	NA	AT1G21100	0	O-methyltransferase family protein
Carubv10011296m.g	9.20272	7.85447e-39	AT1G20940	0	F-box family protein
Carubv10010334m.g	-0.319848	0.3457	AT1G21140	0	Vacuolar iron transporter (VIT) family protein
Carubv10011358m.g	1.17426	1.28916e-05	AT1G21150	0	Mitochondrial transcription termination factor family protein
Carubv10008185m.g	1.30121	1.02387e-07	AT1G21160	0	eukaryotic translation initiation factor 2 (eIF-2) family protein
Carubv10008149m.g	0.443103	0.021485	AT1G21170	SEC5B	Exocyst complex component SEC5
Carubv10010645m.g	0.649628	0.00238042	AT1G21190	0	Small nuclear ribonucleoprotein family protein
Carubv10009151m.g	-0.500389	0.0148899	AT1G21200	0	sequence-specific DNA binding transcription factors
Carubv10011787m.g	1.6316	0.301057	AT1G21210	WAK4	wall associated kinase 4
Carubv10008400m.g	-0.518921	0.692691	AT1G21230	WAK5	wall associated kinase 5
Carubv10008422m.g	-0.470954	NA	AT1G21230	WAK5	wall associated kinase 5
Carubv10008398m.g	-0.470954	NA	AT1G21230	WAK5	wall associated kinase 5
Carubv10011280m.g	-0.679762	0.682703	AT1G21270	WAK2	wall-associated kinase 2
Carubv10011820m.g	-0.471858	NA	AT1G30790	0	F-box and associated interaction domains-containing protein
Carubv10008425m.g	0.568162	NA	AT1G21270	WAK2	wall-associated kinase 2
Carubv10009850m.g	-1.62935	8.11552e-10	AT1G21310	ATEXT3,EXT3,RSH	extensin 3
Carubv10010842m.g	1.70916	0.293011	AT1G21326	0	VQ motif-containing protein
Carubv10011367m.g	0.276061	NA	AT1G21327	0	0
Carubv10011507m.g	0.674043	0.319483	AT1G21340	0	Dof-type zinc finger DNA-binding family protein
Carubv10012470m.g	0.291016	0.482112	AT1G21350	0	Thioredoxin superfamily protein
Carubv10010234m.g	-0.470954	NA	AT1G21360	GLTP2	glycolipid transfer protein 2
Carubv10011688m.g	-0.24812	0.453394	AT1G21370	0	0
Carubv10011646m.g	-0.00521339	0.985132	AT1G21380	0	Target of Myb protein 1
Carubv10010005m.g	0.235252	0.604172	AT1G21390	emb2170	embryo defective 2170
Carubv10011318m.g	5.40331	3.12899e-08	AT1G21395	0	0
Carubv10009022m.g	0.729424	0.00190765	AT1G21400	0	Thiamin diphosphate-binding fold (THDP-binding) superfamily protein
[truncated: 24,524 more rows]

## Sheet: Co x Cr
Supplementary Table 1. Gene expression in all analyzed genotypes.
DESeq2 analysis of Co x Cr vs Co x Co
Gene	log2FoldChange	padj	Ath ortholog	Ath annotations	Ath annotations
Carubv10010485m.g	0.124378	0.67675	AT1G02140	HAP1,MAGO,MEE63	mago nashi family protein
Carubv10011809m.g	-0.627768	0.00745881	AT1G02145	ALG12,EBS4	homolog of asparagine-linked glycosylation 12
Carubv10011354m.g	1.29078	6.86502e-08	AT1G02150	0	Tetratricopeptide repeat (TPR)-like superfamily protein
Carubv10011359m.g	-0.44951	0.198155	AT1G02160	0	Cox19 family protein (CHCH motif)
Carubv10011418m.g	-0.210991	0.397712	AT1G02170	AMC1,ATMC1,ATMCPB1,LOL3,MCP1B	metacaspase 1
Carubv10008574m.g	6.21051	1.10483e-15	AT1G02190	0	Fatty acid hydroxylase superfamily
Carubv10008547m.g	1.44158	0.0931212	AT1G02205	CER1	Fatty acid hydroxylase superfamily
Carubv10010169m.g	0.00603526	0.98594	AT1G02130	ARA-5,ARA5,ATRAB1B,ATRABD2A,RA-5,RABD2A	RAS 5
Carubv10008556m.g	-0.768989	0.000835812	AT1G02120	VAD1	GRAM domain family protein
Carubv10008455m.g	0.949815	0.000690941	AT1G02110	0	Protein of unknown function (DUF630 and DUF632)
Carubv10009548m.g	0.0895613	0.748866	AT1G02100	0	Leucine carboxyl methyltransferase
Carubv10009724m.g	-0.182917	0.60523	AT1G02090	ATCSN7,COP15,CSN7,FUS5	Proteasome component (PCI) domain protein
Carubv10009759m.g	0.553664	0.303522	AT2G35680	0	Phosphotyrosine protein phosphatases superfamily protein
Carubv10012145m.g	0.241509	0.266213	AT1G02080	0	transcription regulators
Carubv10011621m.g	3.34778	0.00413815	AT1G02070	0	0
Carubv10009506m.g	0.40981	NA	AT1G02065	SPL8	squamosa promoter binding protein-like 8
Carubv10011958m.g	1.87585	1.21051e-07	AT1G02060	0	Tetratricopeptide repeat (TPR)-like superfamily protein
Carubv10011272m.g	1.12759	0.0103134	AT1G02040	0	C2H2-type zinc finger family protein
Carubv10008571m.g	-0.0474	0.880058	AT1G02020	0	nitroreductase family protein
Carubv10008507m.g	-0.0652057	0.802273	AT1G02010	SEC1A	secretory 1A
Carubv10011557m.g	0.4746	0.0723882	AT1G01990	0	0
Carubv10011221m.g	-1.0767	0.0430662	AT1G01980	ATSEC1A,SEC1A	FAD-binding Berberine family protein
Carubv10009324m.g	0.366362	0.326415	AT1G01970	0	Tetratricopeptide repeat (TPR)-like superfamily protein
Carubv10008079m.g	-0.967	1.09923e-06	AT1G01960	EDA10	SEC7-like guanine nucleotide exchange family protein
Carubv10008265m.g	0.225256	0.401746	AT1G01950	ARK2	armadillo repeat kinesin 2
Carubv10012351m.g	0.564719	0.0247949	AT1G01940	0	Cyclophilin-like peptidyl-prolyl cis-trans isomerase family protein
Carubv10008663m.g	-0.428508	0.28107	AT1G01930	0	zinc finger protein-related
Carubv10008771m.g	-0.138263	0.642228	AT1G01920	0	SET domain-containing protein
Carubv10009581m.g	-0.034237	0.897674	AT1G01910	0	P-loop containing nucleoside triphosphate hydrolases superfamily protein
Carubv10008379m.g	-2.59844	7.97973e-05	AT1G01900	ATSBT1.1,SBTI1.1	subtilase family protein
Carubv10011785m.g	0.0198681	0.945534	AT1G01880	0	5\'-3\' exonuclease family protein
Carubv10009683m.g	0.0276336	0.941911	AT1G01860	PFC1	Ribosomal RNA adenine dimethylase family protein
Carubv10011703m.g	0.0537316	NA	AT1G01840	0	0
Carubv10008707m.g	-1.48878	1.78558e-12	AT1G01830	0	ARM repeat superfamily protein
Carubv10012511m.g	2.65396	0.000129561	AT1G01810	0	0
Carubv10011770m.g	-0.551661	0.198312	AT1G01790	ATKEA1,KEA1	K+ efflux antiporter 1
Carubv10010886m.g	-0.978919	0.000453135	AT1G01780	0	GATA type zinc finger transcription factor family protein
Carubv10012179m.g	-1.03019	6.51992e-05	AT1G01770	0	0
Carubv10011834m.g	-1.17239	0.000123067	AT1G01760	0	adenosine deaminases;RNA binding;RNA binding;adenosine deaminases
Carubv10011760m.g	-1.14468	0.035541	AT1G01750	ADF11	actin depolymerizing factor 11
Carubv10012619m.g	0.0537316	NA	AT1G01740	0	Protein kinase protein with tetratricopeptide repeat domain
Carubv10010200m.g	0.09151	0.7435	AT1G01730	0	0
Carubv10009926m.g	1.44755	0.0013993	AT1G01720	ANAC002,ATAF1	NAC (No Apical Meristem) domain transcriptional regulator superfamily protein
Carubv10009215m.g	-1.07682	1.17306e-10	AT1G01710	0	Acyl-CoA thioesterase family protein
Carubv10010705m.g	0.0537316	NA	AT4G00480	ATMYC1,myc1	basic helix-loop-helix (bHLH) DNA-binding superfamily protein
Carubv10011721m.g	0.33326	0.821224	AT1G01700	ATROPGEF2,ROPGEF2	RHO guanyl-nucleotide exchange factor 2
Carubv10009199m.g	0.90888	0.0657884	AT1G01695	0	Phosphatidylinositol N-acetyglucosaminlytransferase subunit P-related
Carubv10009137m.g	-0.377864	0.263601	AT1G01690	ATPRD3,PRD3	putative recombination initiation defects 3
Carubv10009781m.g	0.700598	0.223467	AT1G01680	ATPUB54,PUB54	plant U-box 54
Carubv10009194m.g	0.647805	0.188234	AT1G01670	0	RING/U-box superfamily protein
Carubv10008712m.g	-0.0974455	0.953245	AT1G01660	0	RING/U-box superfamily protein
Carubv10008675m.g	-0.723616	0.00938992	AT1G01650	ATSPPL4,SPPL4	SIGNAL PEPTIDE PEPTIDASE-LIKE 4
Carubv10012544m.g	0.0537316	NA	AT1G01640	0	BTB/POZ domain-containing protein
Carubv10010070m.g	-4.48258	1.27983e-63	AT1G01630	0	Sec14p-like phosphatidylinositol transfer family protein
Carubv10009929m.g	-0.00527272	0.993705	AT1G01620	PIP1;3,PIP1C,TMP-B	plasma membrane intrinsic protein 1C
Carubv10008926m.g	0.932105	0.00294682	AT1G01610	ATGPAT4,GPAT4	glycerol-3-phosphate acyltransferase 4
Carubv10011916m.g	-2.10428	2.30557e-05	AT1G03000	PEX6	peroxin 6
Carubv10010662m.g	0.537843	0.488337	AT1G01600	CYP86A4	cytochrome P450, family 86, subfamily A, polypeptide 4
Carubv10011562m.g	4.43929	8.3678e-05	AT1G01600	CYP86A4	cytochrome P450, family 86, subfamily A, polypeptide 4
Carubv10008441m.g	1.04512	0.515941	AT1G01580	ATFRO2,FRD1,FRO2	ferric reduction oxidase 2
Carubv10008901m.g	1.87389	0.000118392	AT1G01570	0	Protein of unknown function (DUF604)
Carubv10009488m.g	1.77896	0.22491	AT1G01560	ATMPK11,MPK11	MAP kinase 11
Carubv10009625m.g	-0.739432	2.70936e-06	AT1G01550	BPS1	Protein of unknown function (DUF793)
Carubv10011595m.g	-2.26093	5.82634e-24	AT1G01540	0	Protein kinase superfamily protein
Carubv10010156m.g	6.68449	1.00923e-07	AT1G01530	AGL28	AGAMOUS-like 28
Carubv10011679m.g	1.00657	0.0366856	AT1G01520	0	Homeodomain-like superfamily protein
Carubv10011468m.g	-0.105694	0.700463	AT1G01510	AN	NAD(P)-binding Rossmann-fold superfamily protein
Carubv10009744m.g	0.00466149	0.99256	AT1G01500	0	Erythronate-4-phosphate dehydrogenase family protein
Carubv10009396m.g	0.315714	0.874177	AT1G01480	ACS2,AT-ACC2	1-amino-cyclopropane-1-carboxylate synthase 2
Carubv10010557m.g	-0.93182	0.108466	AT1G01470	LEA14,LSR3	Late embryogenesis abundant protein
Carubv10009221m.g	-0.221187	0.851573	AT1G01460	ATPIPK11,PIPK11	Phosphatidylinositol-4-phosphate 5-kinase, core
Carubv10010006m.g	2.41126	0.087883	AT1G01453	0	0
Carubv10010980m.g	-0.672645	0.0462253	AT1G01450	0	Protein kinase superfamily protein
Carubv10008546m.g	-0.896999	0.00593893	AT1G01440	0	Protein of unknown function (DUF3133)
Carubv10009105m.g	-0.542248	0.144935	AT1G01430	TBL25	TRICHOME BIREFRINGENCE-LIKE 25
Carubv10011054m.g	-1.17407	0.336701	AT1G01390	0	UDP-Glycosyltransferase superfamily protein
Carubv10011382m.g	1.35133	0.219466	AT1G01380	ETC1	Homeodomain-like superfamily protein
Carubv10010436m.g	0.4311	0.275603	AT1G01370	CENH3,HTR12	Histone superfamily protein
Carubv10010391m.g	-1.29253	3.09357e-06	AT1G01360	PYL9,RCAR1	regulatory component of ABA receptor 1
Carubv10009639m.g	0.359663	0.224441	AT1G01350	0	Zinc finger (CCCH-type/C3HC4-type RING finger) family protein
Carubv10008437m.g	-2.02918	0.147045	AT1G01340	ACBK1,ATCNGC10,CNGC10	cyclic nucleotide gated channel 10
Carubv10011109m.g	1.01274	0.0188355	AT1G01320	0	Tetratricopeptide repeat (TPR)-like superfamily protein
Carubv10012656m.g	-1.34929	0.0190071	AT1G01310	0	CAP (Cysteine-rich secretory proteins, Antigen 5, and Pathogenesis-related 1 protein) superfamily protein
Carubv10009005m.g	2.39191	8.13987e-11	AT1G01300	0	Eukaryotic aspartyl protease family protein
Carubv10009994m.g	0.391492	0.266907	AT1G01290	CNX3	cofactor of nitrate reductase and xanthine dehydrogenase 3
Carubv10011315m.g	0.577935	NA	AT1G01280	CYP703,CYP703A2	cytochrome P450, family 703, subfamily A, polypeptide 2
Carubv10008640m.g	-0.575456	0.0452917	AT1G01260	0	basic helix-loop-helix (bHLH) DNA-binding superfamily protein
Carubv10010347m.g	-0.313549	0.767569	AT1G01250	0	Integrase-type DNA-binding superfamily protein
Carubv10009708m.g	-2.4597	3.3078e-09	AT1G01240	0	0
Carubv10010529m.g	-1.70847	4.71473e-13	AT1G01230	0	ORMDL family protein
Carubv10010395m.g	-4.28277	3.69342e-10	AT1G01225	0	NC domain-containing protein-related
Carubv10010167m.g	2.29231	3.17639e-06	AT1G01200	ATRAB-A3,ATRABA3,RABA3	RAB GTPase homolog A3
Carubv10008749m.g	0.458765	NA	AT1G01190	CYP78A8	cytochrome P450, family 78, subfamily A, polypeptide 8
Carubv10009834m.g	1.47164	0.315097	AT1G01180	0	S-adenosyl-L-methionine-dependent methyltransferases superfamily protein
Carubv10010775m.g	-2.44741	0.0618999	AT1G01170	0	Protein of unknown function (DUF1138)
Carubv10010354m.g	0.0537316	NA	AT1G01160	GIF2	GRF1-interacting factor 2
Carubv10009814m.g	-1.59239	0.297737	AT1G01150	0	Homeodomain-like protein with RING/FYVE/PHD-type zinc finger domain
Carubv10009130m.g	1.35254	1.20461e-10	AT1G01140	CIPK9,PKS6,SnRK3.12	CBL-interacting protein kinase 9
Carubv10012263m.g	1.38572	0.00752758	AT1G01120	KCS1	3-ketoacyl-CoA synthase 1
Carubv10008796m.g	3.039	8.62841e-05	AT1G01110	IQD18	IQ-domain 18
Carubv10010699m.g	0.442844	0.14008	AT4G00810	0	60S acidic ribosomal protein family
Carubv10009201m.g	-0.670307	0.0192171	AT1G01090	PDH-E1 ALPHA	pyruvate dehydrogenase E1 alpha
Carubv10009913m.g	1.13586	0.0158028	AT1G01080	0	RNA-binding (RRM/RBD/RNP motifs) family protein
Carubv10009303m.g	-0.29935	NA	AT1G01070	0	nodulin MtN21 /EamA-like transporter family protein
Carubv10008551m.g	-0.241676	0.492731	AT1G01060	LHY,LHY1	Homeodomain-like superfamily protein
Carubv10010288m.g	0.0537316	NA	AT1G01050	AtPPa1,PPa1	pyrophosphorylase 1
Carubv10008073m.g	0.255733	0.345682	AT1G01040	ASU1,ATDCL1,CAF,DCL1,EMB60,EMB76,SIN1,SUS1	dicer-like 1
Carubv10009540m.g	-0.65229	0.685621	AT1G01030	NGA3	AP2/B3-like transcriptional factor family protein
Carubv10011984m.g	0.0537316	NA	AT1G01020	ARV1	Arv1-like protein
Carubv10009451m.g	0.76449	0.39706	AT1G01010	ANAC001,NAC001	NAC domain containing protein 1
Carubv10009049m.g	-1.71735	7.5379e-06	AT1G01010	ANAC001,NAC001	NAC domain containing protein 1
Carubv10011623m.g	-3.47532	0.00464362	AT3G04430	anac049,NAC049	NAC domain containing protein 49
Carubv10009390m.g	4.26348	1.70513e-08	AT1G02220	ANAC003,NAC003	NAC domain containing protein 3
Carubv10009727m.g	2.5231	0.077996	AT1G02250	anac005,NAC005	NAC domain containing protein 5
Carubv10008913m.g	-0.434846	0.133922	AT1G02260	0	Divalent ion symporter
Carubv10008987m.g	-0.253781	0.322787	AT1G02270	0	Calcium-binding endonuclease/exonuclease/phosphatase family
Carubv10011793m.g	-0.703461	NA	AT2G41610	0	0
Carubv10009713m.g	-0.207793	0.753846	AT3G62850	0	zinc finger protein-related
Carubv10010930m.g	-0.170809	0.573787	AT1G02280	ATTOC33,PPI1,TOC33	translocon at the outer envelope membrane of chloroplasts 33
Carubv10012070m.g	-1.5891	6.54015e-08	AT1G02290	0	0
Carubv10009537m.g	-0.59686	0.0149976	AT1G02305	0	Cysteine proteinases superfamily protein
Carubv10011405m.g	0.232342	0.889269	AT1G02310	MAN1	Glycosyl hydrolase superfamily protein
Carubv10011322m.g	0.247378	0.888729	AT4G01630	ATEXP17,ATEXPA17,ATHEXP ALPHA 1.13,EXPA17	expansin A17
Carubv10009977m.g	0.972326	2.43449e-06	AT1G02330	0	0
Carubv10010261m.g	-2.53484	0.00193406	AT1G02335	GL22	germin-like protein subfamily 2 member 2 precursor
Carubv10009652m.g	-0.658539	0.365435	AT1G02340	FBI1,HFR1,REP1,RSF1	basic helix-loop-helix (bHLH) DNA-binding superfamily protein
Carubv10010007m.g	0.643078	0.734551	AT1G02360	0	Chitinase family protein
Carubv10008848m.g	1.52447	5.01255e-13	AT1G02370	0	Tetratricopeptide repeat (TPR)-like superfamily protein
Carubv10010187m.g	0.323319	0.549843	AT1G02380	0	0
Carubv10008716m.g	-0.52396	0.159381	AT1G02390	ATGPAT2,GPAT2	glycerol-3-phosphate acyltransferase 2
Carubv10010711m.g	-0.171632	0.878033	0	0	0
Carubv10011406m.g	-0.182013	0.907735	AT1G06810	0	0
Carubv10009706m.g	1.58491	0.240509	AT1G02400	ATGA2OX4,ATGA2OX6,DTA1,GA2OX6	gibberellin 2-oxidase 6
Carubv10009922m.g	-0.171867	0.560982	AT1G02410	0	cytochrome c oxidase assembly protein CtaG / Cox11 family
Carubv10012086m.g	0.371888	0.264808	AT1G02420	0	Pentatricopeptide repeat (PPR) superfamily protein
Carubv10011316m.g	0.457321	0.361243	AT1G02440	ARFD1A,ATARFD1A	ADP-ribosylation factor D1A
Carubv10010607m.g	-0.0732481	NA	AT1G02450	NIMIN-1,NIMIN1	NIM1-interacting 1
Carubv10008847m.g	0.519729	0.709881	AT1G02460	0	Pectin lyase-like superfamily protein
Carubv10011810m.g	1.54516	0.124966	AT1G02470	0	Polyketide cyclase/dehydrase and lipid transport superfamily protein
Carubv10010960m.g	0.375993	0.287848	AT1G02475	0	Polyketide cyclase/dehydrase and lipid transport superfamily protein
Carubv10009376m.g	-0.389668	0.104594	AT1G02500	AtSAM1,MAT1,SAM-1,SAM1	S-adenosylmethionine synthetase 1
Carubv10011333m.g	-0.374373	NA	AT1G02510	ATKCO4,ATTPK4,KCO4,TPK4	Outward rectifying potassium channel protein
Carubv10008098m.g	0.457954	0.131889	AT1G02520	PGP11	P-glycoprotein 11
Carubv10011825m.g	0.051433	NA	AT1G02540	0	0
Carubv10011902m.g	0.0537316	NA	AT1G03490	ANAC006,NAC006	NAC domain containing protein 6
Carubv10011439m.g	0.0537316	NA	AT1G02550	0	Plant invertase/pectin methylesterase inhibitor superfamily protein
Carubv10009892m.g	-0.0550876	0.864932	AT1G02560	CLPP5,NCLPP1,NCLPP5	nuclear encoded CLP protease 5
Carubv10009964m.g	-0.854278	0.426759	AT1G02570	0	0
Carubv10012183m.g	4.71302	4.63873e-07	AT1G02580	EMB173,FIS1,MEA,SDG5	SET domain-containing protein
Carubv10010204m.g	-1.03766	0.0913689	AT1G02610	0	RING/FYVE/PHD zinc finger superfamily protein
Carubv10010357m.g	-0.516833	0.0175108	AT4G02080	ASAR1,ATSAR2,ATSARA1C,SAR2	secretion-associated RAS super family 2
Carubv10008081m.g	-0.92941	3.64257e-08	AT3G08530	0	Clathrin, heavy chain
Carubv10009401m.g	0.45924	NA	AT1G02630	0	Nucleoside transporter family protein
Carubv10008371m.g	0.993777	0.0126054	AT1G02640	ATBXL2,BXL2	beta-xylosidase 2
Carubv10008788m.g	1.23471	0.0373391	AT1G02650	0	Tetratricopeptide repeat (TPR)-like superfamily protein
Carubv10011093m.g	-1.53145	3.54477e-07	AT1G02660	0	alpha/beta-Hydrolases superfamily protein
Carubv10010712m.g	-2.10994	0.113163	0	0	0
Carubv10011279m.g	0.45924	NA	0	0	0
Carubv10010486m.g	-0.0269661	0.930772	AT1G02680	TAF13	TBP-associated factor 13
Carubv10010400m.g	-1.21745	0.284225	AT5G38700	0	0
Carubv10011230m.g	0.158178	0.750249	AT5G61710	0	0
Carubv10008795m.g	1.08568	4.9968e-05	AT1G02690	IMPA-6	importin alpha isoform 6
Carubv10010109m.g	-6.74768	7.98337e-11	AT1G02700	0	0
Carubv10009529m.g	-4.94713	1.23026e-35	AT1G02720	GATL5	galacturonosyltransferase 5
Carubv10010155m.g	-0.294246	0.738056	AT1G01355	0	Putative endonuclease or glycosyl hydrolase
Carubv10008123m.g	-1.72557	0.000331815	AT1G02730	ATCSLD5,CSLD5,SOS6	cellulose synthase-like D5
Carubv10009970m.g	-0.318991	0.326873	AT1G02740	0	MRG family protein
Carubv10011158m.g	-1.10884	0.0602591	AT1G03190	ATXPD,UVH6	RAD3-like DNA-binding helicase protein
Carubv10010253m.g	0.204167	0.672952	AT1G02750	0	Drought-responsive family protein
Carubv10010281m.g	0.21267	0.405721	AT1G02780	emb2386	Ribosomal protein L19e family protein
Carubv10012094m.g	-1.38752	0.00158132	AT1G02790	PGA4	polygalacturonase 4
Carubv10011914m.g	2.02631	0.156347	AT1G02800	ATCEL2,CEL2	cellulase 2
Carubv10011654m.g	-0.31071	0.783088	AT1G02810	0	Plant invertase/pectin methylesterase inhibitor superfamily
Carubv10012198m.g	0.0537316	NA	AT1G02813	0	Protein of unknown function, DUF538
Carubv10010322m.g	-0.105722	0.828674	AT1G02816	0	Protein of unknown function, DUF538
Carubv10010737m.g	-0.668296	0.604179	AT1G02820	0	Late embryogenesis abundant 3 (LEA3) family protein
Carubv10012583m.g	-1.82437	0.329367	AT1G02830	0	Ribosomal L22e protein family
Carubv10011110m.g	0.552538	0.357385	AT4G02425	0	0
Carubv10011968m.g	0.629108	0.0259572	AT1G02840	ATSRP34,SR1,SRP34	RNA-binding (RRM/RBD/RNP motifs) family protein
Carubv10008974m.g	-0.886867	0.261151	AT1G02850	BGLU11	beta glucosidase 11
Carubv10009650m.g	1.41911	1.42809e-05	AT1G02860	BAH1,NLA	SPX (SYG1/Pho81/XPR1) domain-containing protein
Carubv10010371m.g	0.0537316	NA	AT1G02870	0	0
Carubv10012039m.g	0.26858	0.228772	AT4G20480	0	Putative endonuclease or glycosyl hydrolase
Carubv10011132m.g	-0.00194126	0.996287	AT4G20480	0	Putative endonuclease or glycosyl hydrolase
Carubv10012506m.g	0.0360819	0.917592	AT1G02880	TPK1	thiamin pyrophosphokinase1
Carubv10008107m.g	0.182976	0.344196	AT1G02890	0	AAA-type ATPase family protein
Carubv10012118m.g	4.17199	0.00178687	AT1G02900	ATRALF1,RALF1,RALFL1	rapid alkalinization factor 1
Carubv10009110m.g	-0.769284	0.00236228	AT1G02910	LPA1	tetratricopeptide repeat (TPR)-containing protein
Carubv10010300m.g	7.27288	3.09585e-45	AT1G02930	ATGST1,ATGSTF3,ATGSTF6,ERD11,GST1,GSTF6	glutathione S-transferase 6
Carubv10012455m.g	3.34053	1.32634e-67	AT1G02930	ATGST1,ATGSTF3,ATGSTF6,ERD11,GST1,GSTF6	glutathione S-transferase 6
Carubv10012405m.g	-1.80087	7.59185e-06	AT1G02940	ATGSTF5,GSTF5	glutathione S-transferase (class phi) 5
Carubv10010097m.g	-1.5309	0.362033	AT1G02950	ATGSTF4,GST31,GSTF4	glutathione S-transferase F4
Carubv10012349m.g	-0.500974	0.110257	AT1G02960	0	0
Carubv10008963m.g	0.295987	0.430393	AT1G02970	ATWEE1,WEE1	WEE1 kinase homolog
Carubv10010979m.g	3.89049	NA	AT1G02980	ATCUL2,CUL2	cullin 2
Carubv10008104m.g	-1.20775	8.69874e-10	AT1G02990	0	0
Carubv10011267m.g	-0.2782	0.212616	AT1G03000	PEX6	peroxin 6
Carubv10008601m.g	-0.684419	NA	AT1G03010	0	Phototropic-responsive NPH3 family protein
Carubv10010921m.g	0.0537316	NA	AT1G03020	0	Thioredoxin superfamily protein
Carubv10009873m.g	-0.645221	0.276022	AT1G03030	0	P-loop containing nucleoside triphosphate hydrolases superfamily protein
Carubv10009831m.g	0.87279	0.000475901	AT1G03040	0	basic helix-loop-helix (bHLH) DNA-binding superfamily protein
Carubv10008628m.g	-1.9859	0.00125238	AT1G03050	0	ENTH/ANTH/VHS superfamily protein
Carubv10010025m.g	1.73095	0.00275903	AT1G03055	0	0
Carubv10008059m.g	-0.995518	4.40692e-06	AT1G03060	SPI	Beige/BEACH domain ;WD domain, G-beta repeat protein
Carubv10011301m.g	-1.63697	0.0796545	AT1G03070	0	Bax inhibitor-1 family protein
Carubv10008080m.g	2.21658	1.07703e-34	AT1G03080	0	kinase interacting (KIP1-like) family protein
Carubv10008397m.g	0.920381	0.000321684	AT1G03090	MCCA	methylcrotonyl-CoA carboxylase alpha chain, mitochondrial / 3-methylcrotonyl-CoA carboxylase 1 (MCCA)
Carubv10011829m.g	0.0537316	NA	AT1G03100	0	Pentatricopeptide repeat (PPR) superfamily protein
Carubv10009228m.g	1.2848	8.14505e-08	AT1G03110	0	Transducin/WD40 repeat-like superfamily protein
Carubv10010425m.g	-2.73319	3.28088e-11	AT1G03120	ATRAB28,RAB28	responsive to abscisic acid 28
Carubv10012376m.g	0.0290151	0.951582	AT1G03130	PSAD-2	photosystem I subunit D-2
Carubv10011298m.g	0.0391174	0.88243	AT1G03140	0	splicing factor Prp18 family protein
Carubv10010452m.g	-0.00522465	0.986537	AT1G03150	0	Acyl-CoA N-acyltransferases (NAT) superfamily protein
Carubv10008235m.g	-0.109889	0.752106	AT1G03160	FZL	FZO-like
Carubv10012407m.g	-2.40478	0.0181976	AT1G03170	0	Protein of unknown function (DUF3049)
Carubv10009697m.g	-0.00793459	0.98745	AT1G03180	0	0
Carubv10008351m.g	0.211229	0.406023	AT1G03190	ATXPD,UVH6	RAD3-like DNA-binding helicase protein
Carubv10011636m.g	1.43101	1.78501e-05	AT1G03220	0	Eukaryotic aspartyl protease family protein
Carubv10009900m.g	-0.441936	0.256629	AT1G03210	0	Phenazine biosynthesis PhzC/PhzF protein
Carubv10010119m.g	-0.606893	0.0218304	AT1G03250	0	0
Carubv10009985m.g	-0.95536	0.000106857	AT1G03260	0	SNARE associated Golgi protein family
Carubv10008943m.g	-0.116673	0.780046	AT1G03270	0	CBS domain-containing protein with a domain of unknown function (DUF21)
Carubv10009067m.g	-0.218301	0.289573	AT1G03280	0	Transcription factor TFIIE, alpha subunit
Carubv10008752m.g	0.0998418	0.856639	AT1G03290	0	0
Carubv10012522m.g	0.0537316	NA	AT1G03300	ATDUF1,DUF1	DOMAIN OF UNKNOWN FUNCTION 724 1
Carubv10012076m.g	0.589636	0.04635	AT1G03310	ATISA2,BE2,DBE1,ISA2	debranching enzyme 1
Carubv10012047m.g	-0.661411	NA	AT1G03320	0	0
Carubv10010754m.g	0.318873	0.204644	AT1G03330	0	Small nuclear ribonucleoprotein family protein
Carubv10011433m.g	1.94428	0.0607855	AT1G03340	0	0
Carubv10009649m.g	1.89192	4.14494e-19	AT4G02930	0	GTP binding Elongation factor Tu family protein
Carubv10009113m.g	-0.724625	0.000444556	AT1G03350	0	BSD domain-containing protein
Carubv10009740m.g	0.399381	0.148179	AT1G03360	ATRRP4,RRP4	ribosomal RNA processing 4
Carubv10008257m.g	0.102446	0.72186	AT1G03365	0	RING/U-box superfamily protein
Carubv10008175m.g	-0.920201	5.26689e-06	AT1G03370	0	C2 calcium/lipid-binding and GRAM domain containing protein
Carubv10008219m.g	-0.627194	0.0106439	AT1G03380	ATATG18G,ATG18G	homolog of yeast autophagy 18 (ATG18) G
Carubv10011653m.g	0.54093	NA	AT1G03390	0	HXXXD-type acyl-transferase family protein
Carubv10012607m.g	-0.366024	NA	AT1G03400	0	2-oxoglutarate (2OG) and Fe(II)-dependent oxygenase superfamily protein
Carubv10009046m.g	-0.976701	0.0513235	AT1G03400	0	2-oxoglutarate (2OG) and Fe(II)-dependent oxygenase superfamily protein
Carubv10010558m.g	-0.441002	0.196675	AT1G03430	AHP5	histidine-containing phosphotransfer factor 5
Carubv10009374m.g	-0.876914	0.0323625	AT1G03440	0	Leucine-rich repeat (LRR) family protein
Carubv10012319m.g	4.86709	2.5904e-06	AT1G03445	BSU1	Serine/threonine protein phosphatase family protein
Carubv10009093m.g	-0.316039	0.650212	AT1G03457	0	RNA-binding (RRM/RBD/RNP motifs) family protein
Carubv10009825m.g	-3.34904	1.08769e-11	AT1G03470	0	Kinase interacting (KIP1-like) family protein
Carubv10009383m.g	0.108542	0.723361	AT1G03475	ATCPO-I,HEMF1,LIN2	Coproporphyrinogen III oxidase
Carubv10011348m.g	-0.366967	NA	AT2G43220	0	Cysteine/Histidine-rich C1 domain family protein
Carubv10012206m.g	0.694259	NA	AT1G03490	ANAC006,NAC006	NAC domain containing protein 6
Carubv10011372m.g	1.1806	0.0204679	AT1G03510	0	Tetratricopeptide repeat (TPR)-like superfamily protein
Carubv10009126m.g	-0.388237	0.186993	AT1G03520	0	Core-2/I-branching beta-1,6-N-acetylglucosaminyltransferase family protein
Carubv10008331m.g	1.13443	1.12326e-06	AT1G03530	ATNAF1,NAF1	nuclear assembly factor 1
Carubv10011274m.g	-0.991996	0.0594541	AT1G03540	0	Pentatricopeptide repeat (PPR-like) superfamily protein
Carubv10012530m.g	-0.250119	0.717988	AT1G03550	0	Secretory carrier membrane protein (SCAMP) family protein
Carubv10008524m.g	-0.702848	0.00322284	AT1G03560	0	Pentatricopeptide repeat (PPR-like) superfamily protein
Carubv10009068m.g	-1.70652	5.16587e-14	AT1G03590	0	Protein phosphatase 2C family protein
Carubv10010460m.g	0.793851	0.0274919	AT1G03600	PSB27	photosystem II family protein
Carubv10012401m.g	0.143854	0.704793	AT1G03610	0	Protein of unknown function (DUF789)
Carubv10010027m.g	1.10543	0.110699	AT1G03620	0	ELMO/CED-12 family protein
Carubv10009346m.g	0.162817	0.718559	AT1G03630	POR C,PORC	protochlorophyllide oxidoreductase C
Carubv10010366m.g	1.54929	0.0229417	AT1G03650	0	Acyl-CoA N-acyltransferases (NAT) superfamily protein
Carubv10010537m.g	-1.17905	5.88516e-06	AT1G03660	0	Ankyrin-repeat containing protein
Carubv10010421m.g	0.326138	0.251538	AT1G03680	ATHM1,ATM1,THM1,TRX-M1	thioredoxin M-type 1
Carubv10009418m.g	0.954803	0.00200614	AT1G03687	0	DTW domain-containing protein
Carubv10012189m.g	0.45924	NA	AT1G03700	0	Uncharacterised protein family (UPF0497)
Carubv10011650m.g	4.66699	5.74313e-12	AT1G03710	0	Cystatin/monellin superfamily protein
Carubv10010476m.g	-0.101237	0.875828	AT1G03730	0	0
Carubv10008411m.g	0.874124	0.000947697	AT1G03740	0	Protein kinase superfamily protein
Carubv10008286m.g	-1.12268	0.000195995	AT1G03750	CHR9	switch 2
Carubv10011875m.g	1.48501	1.17286e-07	AT1G03760	0	Prefoldin chaperone subunit family protein
Carubv10009016m.g	-0.690163	0.0713887	AT1G03770	ATRING1B,RING1B	RING 1B
Carubv10008388m.g	-0.647582	0.225728	AT1G03780	TPX2	targeting protein for XKLP2
Carubv10011207m.g	0.770222	0.619993	AT1G03790	SOM	Zinc finger C-x8-C-x5-C-x3-H type family protein
Carubv10011371m.g	1.21697	0.0257352	AT1G03800	ATERF10,ERF10	ERF domain protein 10
Carubv10010570m.g	0.280236	0.501222	AT1G03810	0	Nucleic acid-binding, OB-fold-like protein
Carubv10011357m.g	0.202671	0.914329	AT1G03820	0	0
Carubv10008276m.g	-0.10588	0.637203	AT1G03830	0	guanylate-binding family protein
Carubv10008897m.g	2.24147	0.00237787	AT1G03840	MGP	C2H2 and C2HC zinc fingers superfamily protein
Carubv10010567m.g	-1.38643	0.295679	AT1G03850	0	Glutaredoxin family protein
Carubv10009925m.g	0.393869	0.0805125	AT1G03860	ATPHB2,PHB2	prohibitin 2
Carubv10011002m.g	0.354743	NA	AT1G03870	FLA9	FASCICLIN-like arabinoogalactan 9
Carubv10011751m.g	0.0517999	NA	AT1G03880	CRB,CRU2	cruciferin 2
Carubv10012169m.g	-3.00079	0.00035471	AT1G03890	0	RmlC-like cupins superfamily protein
Carubv10009732m.g	-1.48405	6.86045e-10	AT1G03900	ATNAP4,NAP4	non-intrinsic ABC protein 4
Carubv10009912m.g	-0.18367	0.552495	AT1G03905	0	P-loop containing nucleoside triphosphate hydrolases superfamily protein
Carubv10008511m.g	0.126108	0.631627	AT1G03910	0	0
Carubv10008713m.g	-1.75515	1.49958e-05	AT1G03920	0	Protein kinase family protein
Carubv10009684m.g	-0.50999	0.181631	AT1G03930	ADK1,CKL9ALPHA,CKL9BETA	dual specificity kinase 1
Carubv10011644m.g	1.02588	0.0139264	AT1G03940	0	HXXXD-type acyl-transferase family protein
Carubv10010296m.g	0.847668	0.078176	AT1G03950	VPS2.3	vacuolar protein sorting-associated protein 2.3
Carubv10009100m.g	-0.908076	0.000509025	AT1G03960	0	Calcium-binding EF hand family protein
Carubv10011573m.g	-0.0275288	0.933436	AT1G03970	GBF4	G-box binding factor 4
Carubv10010963m.g	-0.951747	NA	AT1G03982	0	PAK-box/P21-Rho-binding family protein
Carubv10012453m.g	-1.09862	0.00526905	AT1G03990	0	Long-chain fatty alcohol dehydrogenase family protein
Carubv10011762m.g	-2.34461	4.00068e-25	AT1G04000	0	0
Carubv10008666m.g	0.847617	0.00263258	AT1G04010	ATPSAT1,PSAT1	phospholipid sterol acyl transferase 1
Carubv10008319m.g	0.268972	0.291523	AT1G04020	ATBARD1,BARD1,ROW1	breast cancer associated RING 1
Carubv10011017m.g	-0.815022	0.182416	AT1G04030	0	0
Carubv10010000m.g	-2.06226	1.08965e-06	AT1G04040	0	HAD superfamily, subfamily IIIB acid phosphatase
Carubv10008474m.g	-1.17694	0.00383707	AT1G04050	SDG13,SUVR1	homolog of SU(var)3-9 1
Carubv10012272m.g	0.531026	0.21274	AT1G04070	ATTOM22-I,TOM22-I	translocase of outer membrane 22-I
Carubv10010956m.g	0.451957	0.0233265	AT1G04080	PRP39	Tetratricopeptide repeat (TPR)-like superfamily protein
Carubv10012003m.g	-1.29307	0.000695582	AT1G04090	0	Plant protein of unknown function (DUF946)
Carubv10010148m.g	0.152482	0.672206	AT1G04100	IAA10	indoleacetic acid-induced protein 10
Carubv10012040m.g	0.0537316	NA	AT1G04110	SDD1	Subtilase family protein
Carubv10008087m.g	-0.738412	0.00121768	AT1G04120	ABCC5,ATABCC5,ATMRP5,MRP5	multidrug resistance-associated protein 5
Carubv10011408m.g	0.8034	0.0166285	AT1G04130	0	Tetratricopeptide repeat (TPR)-like superfamily protein
Carubv10011722m.g	-0.412686	0.0258264	AT1G04140	0	Transducin family protein / WD-40 repeat family protein
Carubv10012494m.g	-0.746942	0.0699734	AT1G04150	0	C2 calcium/lipid-binding plant phosphoribosyltransferase family protein
Carubv10008089m.g	-2.22856	4.35453e-17	AT1G04160	ATXIB,XI-8,XI-B,XIB	myosin XI B
Carubv10008849m.g	-0.194943	0.305698	AT1G04170	EIF2 GAMMA	eukaryotic translation initiation factor 2 gamma subunit
Carubv10009248m.g	4.1363	5.32451e-05	AT1G04180	YUC9	YUCCA 9
Carubv10009715m.g	-0.337962	0.102435	AT1G04190	0	Tetratricopeptide repeat (TPR)-like superfamily protein
Carubv10008423m.g	-1.61874	3.66503e-14	AT1G04200	0	0
Carubv10008166m.g	-0.440656	0.0093925	AT1G04210	0	Leucine-rich repeat protein kinase family protein
Carubv10008867m.g	-2.54342	4.22949e-05	AT1G04220	KCS2	3-ketoacyl-CoA synthase 2
Carubv10010871m.g	1.32489	1.53576e-09	AT1G04230	0	Protein of unknown function (DUF2361)
Carubv10010367m.g	-3.45593	1.40395e-05	AT1G04240	IAA3,SHY2	AUX/IAA transcriptional regulator family protein
Carubv10010236m.g	1.21879	0.00234858	AT1G04250	AXR3,IAA17	AUX/IAA transcriptional regulator family protein
Carubv10011583m.g	-0.047695	0.886154	AT1G04260	MPI7,MPIP7,PRA1.D	CAMV movement protein interacting protein 7
Carubv10010394m.g	0.282578	0.350396	AT1G04270	RPS15	cytosolic ribosomal protein S15
Carubv10012550m.g	-0.257208	0.42431	AT1G04280	0	P-loop containing nucleoside triphosphate hydrolases superfamily protein
Carubv10010530m.g	1.30337	1.55207e-09	AT1G04290	0	Thioesterase superfamily protein
Carubv10012200m.g	-0.257739	0.111607	AT1G04300	0	TRAF-like superfamily protein
Carubv10008561m.g	-0.783173	1.13482e-05	AT1G04310	ERS2	ethylene response sensor 2
Carubv10010725m.g	0.0358955	0.982083	AT1G04330	0	0
Carubv10010342m.g	-0.482356	0.0471887	AT1G04340	0	HR-like lesion-inducing protein-related
Carubv10012007m.g	2.16713	0.194501	AT1G04360	0	RING/U-box superfamily protein
Carubv10011057m.g	0.0537316	NA	AT1G04370	ATERF14,ERF14	Ethylene-responsive element binding factor 14
Carubv10012463m.g	-6.95135	8.25955e-10	AT1G04380	0	2-oxoglutarate (2OG) and Fe(II)-dependent oxygenase superfamily protein
Carubv10012499m.g	0.26017	0.394182	AT1G04390	0	BTB/POZ domain-containing protein
Carubv10008610m.g	0.461886	0.0547005	AT1G04400	AT-PHH1,ATCRY2,CRY2,FHA,PHH1	cryptochrome 2
Carubv10009108m.g	0.839999	0.00347558	AT1G04420	0	NAD(P)-linked oxidoreductase superfamily protein
Carubv10011254m.g	1.27021	6.74236e-07	AT1G04430	0	S-adenosyl-L-methionine-dependent methyltransferases superfamily protein
Carubv10012017m.g	-0.113393	0.682292	AT1G04440	CKL13	casein kinase like 13
Carubv10011479m.g	6.91472	8.56997e-06	AT1G04445	0	C2H2-like zinc finger protein
Carubv10012323m.g	4.13146	6.86481e-06	AT1G04450	RIC3	ROP-interactive CRIB motif-containing protein 3
Carubv10012095m.g	2.73705	1.37838e-06	AT2G33450	0	Ribosomal L28 family
Carubv10010690m.g	2.57541	3.79156e-05	AT2G33450	0	Ribosomal L28 family
Carubv10012233m.g	-1.43521	0.0155133	AT1G04470	0	Protein of unknown function (DUF810)
Carubv10012532m.g	0.750207	0.0201653	AT1G04480	0	Ribosomal protein L14p/L23e family protein
Carubv10011182m.g	-4.47378	5.8043e-25	AT1G04490	0	Protein of unknown function (DUF3527)
Carubv10009410m.g	-1.15814	0.427807	AT1G04500	0	CCT motif family protein
Carubv10008852m.g	0.161833	0.403211	AT1G04510	MAC3A	MOS4-associated complex 3A
Carubv10009823m.g	-0.9953	0.00454913	AT1G04520	PDLP2	plasmodesmata-located protein 2
Carubv10009880m.g	-1.13364	0.0136438	AT1G04530	0	Tetratricopeptide repeat (TPR)-like superfamily protein
Carubv10011922m.g	-2.07815	0.00900816	AT1G04540	0	Calcium-dependent lipid-binding (CaLB domain) family protein
Carubv10009764m.g	1.48771	0.00195162	AT1G04550	BDL,IAA12	AUX/IAA transcriptional regulator family protein
Carubv10010566m.g	1.03658	0.00111522	AT1G04555	0	0
Carubv10012389m.g	5.53367	3.32518e-05	AT1G04560	0	AWPM-19-like family protein
Carubv10008801m.g	2.16827	3.66354e-09	AT1G04570	0	Major facilitator superfamily protein
Carubv10011163m.g	-7.11312	1.35638e-108	AT1G04580	AAO4,AO4,ATAO-4,ATAO2	aldehyde oxidase 4
Carubv10009357m.g	0.1636	0.606256	AT1G04590	0	0
Carubv10012168m.g	-1.37298	0.0372394	AT1G04600	ATXIA,XIA	myosin XI A
Carubv10011757m.g	3.45752	3.32781e-05	AT1G04610	YUC3	YUCCA 3
Carubv10011940m.g	0.631293	0.0546824	AT1G04620	0	coenzyme F420 hydrogenase family / dehydrogenase, beta subunit family
Carubv10010588m.g	-0.248207	0.440163	AT1G04630	MEE4	GRIM-19 protein
Carubv10010559m.g	1.49295	0.00457912	AT1G04635	EMB1687	ribonuclease P family protein / Rpp14 family protein
Carubv10010053m.g	0.334699	0.477174	AT1G04640	LIP2	lipoyltransferase 2
Carubv10011016m.g	-1.07949	0.0238029	AT1G04645	0	Plant self-incompatibility protein S1 family
Carubv10008197m.g	0.194596	0.431943	AT1G04650	0	0
Carubv10012332m.g	-0.841201	0.675441	AT1G04670	0	0
Carubv10009197m.g	-2.12793	0.000580757	AT1G04680	0	Pectin lyase-like superfamily protein
Carubv10009717m.g	-0.307499	0.297354	AT1G04690	KAB1,KV-BETA1	potassium channel beta subunit 1
Carubv10011648m.g	-0.624964	0.434038	AT1G04700	0	PB1 domain-containing protein tyrosine kinase
Carubv10008506m.g	0.605605	0.00481257	AT1G50920	0	Nucleolar GTP-binding protein
Carubv10009140m.g	-1.00299	2.11499e-05	AT1G04710	KAT1,PKT4	peroxisomal 3-ketoacyl-CoA thiolase 4
Carubv10008278m.g	0.520737	0.0427923	AT1G04730	CTF18	P-loop containing nucleoside triphosphate hydrolases superfamily protein
Carubv10010251m.g	-0.441411	0.0322373	AT1G04750	AT VAMP7B,ATVAMP721,VAMP721,VAMP7B	vesicle-associated membrane protein 721
Carubv10012187m.g	-2.65725	0.000730498	AT1G04760	ATVAMP726,VAMP726	vesicle-associated membrane protein 726
Carubv10009848m.g	2.13627	4.29899e-09	AT1G04770	0	Tetratricopeptide repeat (TPR)-like superfamily protein
Carubv10008526m.g	0.175072	0.537508	AT1G04780	0	Ankyrin repeat family protein
Carubv10008582m.g	0.0738983	0.757807	AT1G04790	0	RING/U-box superfamily protein
Carubv10008193m.g	0.0594901	0.778987	AT1G04810	0	26S proteasome regulatory complex, non-ATPase subcomplex, Rpn2/Psmd1 subunit
Carubv10009123m.g	-0.491148	0.0355722	AT1G04830	0	Ypt/Rab-GAP domain of gyp1p superfamily protein
Carubv10010811m.g	0.0537316	NA	0	0	0
Carubv10008505m.g	0.139283	0.866899	AT1G04840	0	Tetratricopeptide repeat (TPR)-like superfamily protein
Carubv10011080m.g	0.753737	0.00105969	AT1G04850	0	ubiquitin-associated (UBA)/TS-N domain-containing protein
Carubv10008214m.g	-0.0751447	0.765311	AT1G04860	ATUBP2,UBP2	ubiquitin-specific protease 2
Carubv10009430m.g	0.42635	0.0788598	AT1G04870	ATPRMT10,PRMT10	protein arginine methyltransferase 10
Carubv10010835m.g	6.59318	1.53619e-06	AT1G04880	0	HMG (high mobility group) box protein with ARID/BRIGHT DNA-binding domain
Carubv10011320m.g	-0.978003	NA	AT1G04890	0	Protein of unknown function, DUF593
Carubv10011212m.g	-0.209496	0.520586	AT1G04900	0	Protein of unknown function (DUF185)
Carubv10008864m.g	-0.56381	0.0137416	AT1G04910	0	O-fucosyltransferase family protein
Carubv10008160m.g	-0.474874	0.344252	AT1G04920	ATSPS3F,SPS3F	sucrose phosphate synthase 3F
Carubv10009801m.g	0.213019	0.619266	AT1G04930	0	hydroxyproline-rich glycoprotein family protein
Carubv10011153m.g	0.298671	0.160966	AT1G04945	0	HIT-type Zinc finger family protein
Carubv10008770m.g	0.293016	0.178328	AT1G04950	ATTAF6,TAF6,TAFII59	TATA BOX ASSOCIATED FACTOR II 59
Carubv10012006m.g	-1.41886	1.12266e-08	AT1G04960	0	Protein of unknown function (DUF1664)
Carubv10008924m.g	-1.10984	3.00925e-06	AT1G04970	0	lipid-binding serum glycoprotein family protein
Carubv10012209m.g	0.702289	0.00745245	AT1G04980	ATPDI10,ATPDIL2-2,PDI10,PDIL2-2	PDI-like 2-2
Carubv10012011m.g	-1.1596	0.000350754	AT1G04985	0	0
Carubv10009335m.g	-0.883409	0.000240789	AT1G04990	0	Zinc finger C-x8-C-x5-C-x3-H type family protein
Carubv10009961m.g	0.821272	0.0120583	AT1G05000	0	Phosphotyrosine protein phosphatases superfamily protein
Carubv10012579m.g	1.59495	0.251474	AT1G43010	0	Pentatricopeptide repeat (PPR) superfamily protein
Carubv10009749m.g	4.47741	1.50855e-23	AT1G05010	ACO4,EAT1,EFE	ethylene-forming enzyme
Carubv10008537m.g	-0.234332	0.821318	AT1G05020	0	ENTH/ANTH/VHS superfamily protein
Carubv10011812m.g	0.0392926	0.97103	AT1G05040	0	0
Carubv10009246m.g	-0.110484	0.737374	AT1G05055	ATGTF2H2,GTF2H2	general transcription factor II H2
Carubv10011171m.g	0.0526742	NA	AT5G40170	AtRLP54,RLP54	receptor like protein 54
Carubv10011495m.g	0.77405	NA	AT5G40170	AtRLP54,RLP54	receptor like protein 54
Carubv10010084m.g	-0.997691	0.000449811	AT1G05060	0	0
Carubv10009946m.g	0.682961	0.665536	AT2G32630	0	Pentatricopeptide repeat (PPR-like) superfamily protein
Carubv10010777m.g	0.40981	NA	AT1G05065	CLE20	CLAVATA3/ESR-RELATED 20
Carubv10010412m.g	3.01999	8.93345e-39	AT1G05070	0	Protein of unknown function (DUF1068)
Carubv10011452m.g	1.30661	NA	AT1G05080	0	F-box/RNI-like/FBD-like domains-containing protein
Carubv10009896m.g	-5.6066	6.32711e-36	AT2G42460	0	TRAF-like family protein
Carubv10008492m.g	-0.50373	0.0560628	AT4G20720	0	dentin sialophosphoprotein-related
Carubv10009674m.g	-1.2029	0.294952	AT1G05100	MAPKKK18	mitogen-activated protein kinase kinase kinase 18
Carubv10008314m.g	-0.326665	0.12789	AT1G05120	0	Helicase protein with RING/U-box domain
Carubv10011717m.g	0.0322968	0.945799	AT1G05140	0	Peptidase M50 family protein
Carubv10012243m.g	-0.727766	0.00432838	AT1G05150	0	Calcium-binding tetratricopeptide family protein
Carubv10008960m.g	1.07782	9.69631e-05	AT1G05160	ATKAO1,CYP88A3,KAO1	cytochrome P450, family 88, subfamily A, polypeptide 3
Carubv10009858m.g	-3.6132	7.9412e-62	AT1G05170	0	Galactosyltransferase family protein
Carubv10008715m.g	-0.206292	0.340815	AT1G05180	AXR1	NAD(P)-binding Rossmann-fold superfamily protein
Carubv10010237m.g	0.68355	0.0451053	AT1G05190	emb2394	Ribosomal protein L6 family
Carubv10008205m.g	1.21583	NA	AT1G05200	ATGLR3.4,GLR3.4,GLUR3	glutamate receptor 3.4
Carubv10010747m.g	-0.147748	0.72186	AT1G05205	0	0
Carubv10010479m.g	-0.707685	0.137282	AT1G05210	0	Transmembrane protein 97, predicted
Carubv10008621m.g	-2.0764	9.23864e-16	AT1G05230	HDG2	homeodomain GLABROUS 2
Carubv10012652m.g	-0.374373	NA	AT1G05250	0	Peroxidase superfamily protein
Carubv10012469m.g	1.02725	NA	AT1G05250	0	Peroxidase superfamily protein
Carubv10010069m.g	2.05233	3.33201e-08	AT1G07440	0	NAD(P)-binding Rossmann-fold superfamily protein
Carubv10011540m.g	-4.12153	4.44601e-10	AT4G20480	0	Putative endonuclease or glycosyl hydrolase
Carubv10012082m.g	-4.02199	2.46434e-06	AT4G20480	0	Putative endonuclease or glycosyl hydrolase
Carubv10009829m.g	1.83388	4.82028e-09	AT1G05260	RCI3,RCI3A	Peroxidase superfamily protein
Carubv10012564m.g	-1.67977	4.52768e-14	AT1G05270	0	TraB family protein
Carubv10012119m.g	-7.49261	3.33934e-76	AT1G05280	0	Protein of unknown function (DUF604)
Carubv10011948m.g	0.0537316	NA	AT1G05290	0	CCT motif family protein
Carubv10011853m.g	2.0456	0.00295416	AT1G05291	0	Protein of unknown function (DUF1218)
Carubv10009542m.g	-2.2664	3.8719e-08	AT1G05300	ZIP5	zinc transporter 5 precursor
Carubv10011085m.g	0.965887	0.469254	AT1G05310	0	Pectin lyase-like superfamily protein
Carubv10011474m.g	-1.28386	1.77944e-12	AT1G05320	0	0
Carubv10012259m.g	0.0537316	NA	AT1G05330	0	0
Carubv10010816m.g	-1.50929	0.244607	AT2G32210	0	0
Carubv10010049m.g	1.15301	0.00167882	AT3G18535	0	tubulin-tyrosine ligases
Carubv10011728m.g	-0.206751	0.783088	AT3G01440	PQL1,PQL2	PsbQ-like 1
Carubv10008192m.g	0.4084	0.242824	AT3G01460	ATMBD9,MBD9	methyl-CPG-binding domain 9
Carubv10009195m.g	-0.551156	0.0156952	AT1G05350	0	NAD(P)-binding Rossmann-fold superfamily protein
Carubv10009268m.g	0.794287	0.00884187	AT1G05360	0	0
Carubv10009204m.g	-3.88763	9.82513e-10	AT1G05370	0	Sec14p-like phosphatidylinositol transfer family protein
Carubv10008137m.g	-0.666993	4.02206e-05	AT1G05380	0	Acyl-CoA N-acyltransferase with RING/FYVE/PHD-type zinc finger protein
Carubv10011658m.g	0.0537316	NA	AT1G05385	LPA19,Psb27-H1	photosystem II 11 kDa protein-related
Carubv10010861m.g	-1.38403	0.200365	AT1G05420	ATOFP12,OFP12	ovate family protein 12
Carubv10009042m.g	0.127851	0.650424	AT1G05410	0	Protein of unknown function (DUF1423)
Carubv10010009m.g	-0.731723	0.00892139	AT1G05430	0	0
Carubv10012616m.g	-2.80106	6.8064e-05	AT1G05440	0	C-8 sterol isomerases
Carubv10010889m.g	-9.99857	4.83484e-47	AT1G05450	0	Bifunctional inhibitor/lipid-transfer protein/seed storage 2S albumin superfamily protein
Carubv10008170m.g	0.243671	0.432862	AT1G05460	SDE3	P-loop containing nucleoside triphosphate hydrolases superfamily protein
Carubv10008606m.g	-2.44702	1.30108e-19	AT1G05470	CVP2	DNAse I-like superfamily protein
Carubv10008086m.g	-2.1151	2.17636e-15	AT1G05490	chr31	chromatin remodeling 31
Carubv10011426m.g	0.0537316	NA	0	0	0
Carubv10010976m.g	-1.11004	2.62525e-07	AT1G05500	ATSYTE,NTMC2T2.1,NTMC2TYPE2.1,SYT5,SYTE	Calcium-dependent lipid-binding (CaLB domain) family protein
Carubv10010839m.g	0.434699	0.743236	AT1G05510	0	Protein of unknown function (DUF1264)
Carubv10011838m.g	0.0733127	0.802095	AT1G05520	0	Sec23/Sec24 protein transport family protein
Carubv10010859m.g	0.40981	NA	AT1G05560	UGT1,UGT75B1	UDP-glucosyltransferase 75B1
Carubv10011245m.g	1.89941	3.55839e-05	AT1G05540	0	Protein of unknown function (DUF295)
Carubv10012442m.g	2.34572	0.0913919	AT1G05550	0	Protein of unknown function (DUF295)
Carubv10009073m.g	2.08889	7.3159e-05	AT1G05560	UGT1,UGT75B1	UDP-glucosyltransferase 75B1
Carubv10012675m.g	-1.75461	3.77403e-12	AT1G05570	ATGSL06,ATGSL6,CALS1,GSL06,GSL6	callose synthase 1
Carubv10010762m.g	0.0537316	NA	AT1G05575	0	0
Carubv10011656m.g	3.21656	0.0280886	AT1G05577	0	Domain of unknown function (DUF966)
Carubv10011346m.g	-1.63955	0.000977959	AT1G05580	ATCHX23,CHX23	cation/H+ exchanger 23
Carubv10011603m.g	-1.50232	1.14133e-09	AT1G05590	ATHEX3,HEXO2	beta-hexosaminidase 2
Carubv10012229m.g	0.271202	0.390971	AT1G05600	0	Tetratricopeptide repeat (TPR)-like superfamily protein
Carubv10009001m.g	0.45924	NA	AT1G05610	APS2	ADP-glucose pyrophosphorylase small subunit 2
Carubv10012044m.g	0.0537316	NA	AT2G24670	0	Domain of unknown function (DUF313)
Carubv10009769m.g	-2.46408	2.42304e-33	AT1G05620	URH2	uridine-ribohydrolase 2
Carubv10008138m.g	0.552807	0.148404	AT1G05630	5PTASE13,AT5PTASE13	Endonuclease/exonuclease/phosphatase family protein
Carubv10008579m.g	0.0537316	NA	AT1G05640	0	Ankyrin repeat family protein
Carubv10011292m.g	0.0537316	NA	AT1G05650	0	Pectin lyase-like superfamily protein
Carubv10012375m.g	0.0537316	NA	AT1G05660	0	Pectin lyase-like superfamily protein
Carubv10008426m.g	-0.0601202	0.859983	AT1G05670	0	Pentatricopeptide repeat (PPR-like) superfamily protein
Carubv10011842m.g	1.33429	0.442423	AT1G05680	UGT74E2	Uridine diphosphate glycosyltransferase 74E2
Carubv10009096m.g	2.43419	0.0290802	AT1G05680	UGT74E2	Uridine diphosphate glycosyltransferase 74E2
Carubv10009329m.g	-0.952863	0.0245259	AT1G05690	BT3	BTB and TAZ domain protein 3
Carubv10011047m.g	-0.692263	NA	AT1G05700	0	Leucine-rich repeat transmembrane protein kinase protein
Carubv10010563m.g	2.87144	1.7366e-09	AT1G05710	0	basic helix-loop-helix (bHLH) DNA-binding superfamily protein
Carubv10010380m.g	-0.608021	0.00566214	AT1G05720	0	selenoprotein family protein
Carubv10010564m.g	1.13954	0.00341358	AT1G05730	0	Eukaryotic protein of unknown function (DUF842)
Carubv10011161m.g	0.0537316	NA	AT1G05750	CLB19,PDE247	Tetratricopeptide repeat (TPR)-like superfamily protein
Carubv10010372m.g	-0.270473	0.764092	AT1G05760	RTM1	Mannose-binding lectin superfamily protein
Carubv10010613m.g	-1.05864	0.000758002	AT1G05785	0	Got1/Sft2-like vescicle transport protein family
Carubv10011376m.g	-0.151885	0.651194	AT1G05790	0	lipase class 3 family protein
Carubv10010888m.g	0.0537316	NA	AT1G05800	DGL	alpha/beta-Hydrolases superfamily protein
Carubv10009382m.g	0.834098	0.000338326	AT1G05805	0	basic helix-loop-helix (bHLH) DNA-binding superfamily protein
Carubv10010263m.g	0.601505	0.0739892	AT1G05810	ARA,ARA-1,ATRAB11D,ATRABA5E,RABA5E	RAB GTPase homolog A5E
Carubv10008828m.g	0.627395	0.103243	AT1G05820	ATSPPL5,SPPL5	SIGNAL PEPTIDE PEPTIDASE-LIKE 5
Carubv10008150m.g	-0.0329902	0.905915	AT1G05830	ATX2,SDG30	trithorax-like protein 2
Carubv10011930m.g	0.0537316	NA	AT1G05835	0	PHD finger protein
Carubv10008865m.g	-0.0868761	0.73431	AT1G05840	0	Eukaryotic aspartyl protease family protein
Carubv10009762m.g	-2.16526	6.1265e-22	AT1G05850	ATCTL1,CTL1,ELP,ELP1,ERH2,HOT2,POM1	Chitinase family protein
Carubv10009960m.g	0.019665	0.95835	AT1G05860	0	0
Carubv10010453m.g	-0.182533	0.511987	AT1G05870	0	Protein of unknown function (DUF1685)
Carubv10008969m.g	0.052138	NA	AT1G05880	ARI12,ATARI12	RING/U-box superfamily protein
Carubv10012456m.g	0.770431	0.000922149	AT1G05890	ARI5,ATARI5	RING/U-box superfamily protein
Carubv10011325m.g	1.73807	0.333043	AT1G05894	0	0
Carubv10012090m.g	-0.128494	0.664972	AT1G05900	ATNTH2,NTH2	endonuclease III 2
Carubv10008115m.g	0.383232	0.0392541	AT1G05910	0	cell division cycle protein 48-related / CDC48-related
Carubv10011639m.g	1.16282	NA	AT1G05920	0	Domain of unknown function (DUF313)
Carubv10012589m.g	0.0537316	NA	AT3G24850	0	Domain of unknown function (DUF313)
Carubv10008604m.g	0.164833	0.563506	AT1G05950	0	0
Carubv10008206m.g	-0.288173	0.192781	AT1G05960	0	ARM repeat superfamily protein
Carubv10010117m.g	0.551685	0.0755455	AT1G05970	0	RNA-binding (RRM/RBD/RNP motifs) family protein
Carubv10010897m.g	0.0537316	NA	AT1G05990	RHS1	EF hand calcium-binding protein family
Carubv10010720m.g	-0.332357	0.267748	AT1G06010	0	0
Carubv10012342m.g	1.5677	0.175598	AT1G06030	0	pfkB-like carbohydrate kinase family protein
Carubv10010113m.g	-0.876084	0.00240257	AT1G06040	STO	B-box zinc finger family protein
Carubv10009838m.g	3.88286	1.27281e-17	AT1G06050	0	Protein of unknown function (DUF1336)
Carubv10009937m.g	0.0537316	NA	AT1G06060	0	LisH and RanBPM domains containing protein
Carubv10008993m.g	-0.252363	0.786611	AT1G06070	0	Basic-leucine zipper (bZIP) transcription factor family protein
Carubv10012159m.g	2.18951	0.132203	AT1G06080	ADS1	delta 9 desaturase 1
Carubv10009877m.g	-3.34109	0.0179218	AT1G06090	0	Fatty acid desaturase family protein
Carubv10011680m.g	0.540968	NA	AT1G06090	0	Fatty acid desaturase family protein
Carubv10012429m.g	-0.115326	0.709534	AT1G06110	SKIP16	SKP1/ASK-interacting protein 16
Carubv10011404m.g	-0.681376	0.0229747	AT1G06130	GLX2-4	glyoxalase 2-4
Carubv10010975m.g	0.0537316	NA	AT1G06135	0	0
Carubv10011363m.g	0.0537316	NA	AT1G06137	0	0
Carubv10011460m.g	0.233414	0.774574	AT1G06140	0	Pentatricopeptide repeat (PPR) superfamily protein
Carubv10011638m.g	-0.0138774	0.971743	AT1G06150	EMB1444	basic helix-loop-helix (bHLH) DNA-binding superfamily protein
Carubv10010105m.g	0.0507124	NA	AT1G06160	ORA59	octadecanoid-responsive Arabidopsis AP2/ERF 59
Carubv10009189m.g	1.94606	0.12486	AT1G06170	0	basic helix-loop-helix (bHLH) DNA-binding superfamily protein
Carubv10010717m.g	0.684152	0.261814	AT1G06180	ATMYB13,ATMYBLFGN,MYB13	myb domain protein 13
Carubv10012682m.g	-0.109135	0.879171	AT1G06180	ATMYB13,ATMYBLFGN,MYB13	myb domain protein 13
Carubv10011218m.g	1.09098	5.12828e-07	AT1G06190	0	Rho termination factor
Carubv10012464m.g	-1.32752	4.67094e-07	AT1G06200	0	Peptidase S24/S26A/S26B/S26C family protein
Carubv10009444m.g	-0.79405	0.000229011	AT1G06210	0	ENTH/VHS/GAT family protein
Carubv10011516m.g	0.0537316	NA	AT1G06225	CLE3	CLAVATA3/ESR-RELATED 3
Carubv10008353m.g	0.206244	0.273481	AT1G06230	GTE4	global transcription factor group E4
Carubv10011561m.g	-0.709584	0.00376949	AT1G06240	0	Protein of unknown function DUF455
Carubv10012192m.g	-1.05732	0.0268666	AT1G06250	0	alpha/beta-Hydrolases superfamily protein
Carubv10011832m.g	-0.155922	0.777802	AT1G06260	0	Cysteine proteinases superfamily protein
Carubv10009635m.g	1.08753	0.000460451	AT1G06270	0	Pentatricopeptide repeat (PPR) superfamily protein
Carubv10011711m.g	0.963981	NA	AT1G06280	LBD2	LOB domain-containing protein 2
Carubv10012245m.g	-0.780556	0.00947163	AT1G06290	ACX3,ATACX3	acyl-CoA oxidase 3
Carubv10010824m.g	-0.814897	0.494967	AT1G06290	ACX3,ATACX3	acyl-CoA oxidase 3
Carubv10011022m.g	-1.12371	0.0083673	AT1G06320	0	0
Carubv10012029m.g	-0.368055	NA	AT1G06330	0	Heavy metal transport/detoxification superfamily protein
Carubv10011095m.g	0.0523114	NA	AT1G06340	0	Plant Tudor-like protein
Carubv10011896m.g	4.26837	2.56702e-31	AT1G06360	0	Fatty acid desaturase family protein
Carubv10010791m.g	-0.89636	0.377771	0	0	0
Carubv10011944m.g	0.178311	0.550894	AT1G06380	0	Ribosomal protein L1p/L10e family
Carubv10009298m.g	-0.840204	0.00486816	AT1G06390	ATGSK1,ATSK2-3,ATSK22,BIL2,GSK1,SK22	GSK3/SHAGGY-like protein kinase 1
Carubv10010250m.g	0.0537316	NA	AT1G06400	ARA-2,ARA2,ATRAB11E,ATRABA1A	Ras-related small GTP-binding family protein
Carubv10008292m.g	-0.863245	5.85965e-07	AT1G06410	ATTPS7,ATTPSA,TPS7	trehalose-phosphatase/synthase 7
Carubv10010258m.g	0.815811	0.0392451	AT1G06420	0	0
Carubv10011447m.g	-0.266647	0.270433	AT1G06430	FTSH8	FTSH protease 8
Carubv10012333m.g	0.258788	0.700966	AT1G06440	0	Ubiquitin carboxyl-terminal hydrolase family protein
Carubv10011336m.g	0.942255	0.00191616	AT1G06450	0	Polynucleotidyl transferase, ribonuclease H-like superfamily protein
Carubv10012533m.g	1.08859	0.010641	AT1G06460	ACD31.2,ACD32.1	alpha-crystallin domain 32.1
Carubv10009289m.g	-1.69079	5.90952e-13	AT1G06470	0	Nucleotide/sugar transporter family protein
Carubv10010766m.g	-0.776914	0.196642	AT1G06475	0	0
Carubv10010938m.g	-0.310653	0.447339	AT1G06500	0	0
Carubv10011989m.g	0.597405	0.0605007	AT1G06510	0	0
Carubv10012249m.g	-3.60731	2.64453e-66	AT1G06520	ATGPAT1,GPAT1	glycerol-3-phosphate acyltransferase 1
Carubv10009757m.g	0.605058	0.0153188	AT1G06530	0	Tropomyosin-related
Carubv10012251m.g	2.67122	0.000452018	AT1G06540	0	0
Carubv10009384m.g	0.330117	0.273867	AT1G06550	0	ATP-dependent caseinolytic (Clp) protease/crotonase family protein
Carubv10011768m.g	0.997893	0.000147364	AT1G06560	0	NOL1/NOP2/sun family protein
Carubv10009131m.g	0.87638	0.00224378	AT1G06570	HPD,PDS1	phytoene desaturation 1
Carubv10008254m.g	0.307021	0.271924	AT1G06590	0	0
Carubv10011473m.g	0.891176	0.0196823	AT1G06620	0	2-oxoglutarate (2OG) and Fe(II)-dependent oxygenase superfamily protein
Carubv10009503m.g	1.66492	1.22361e-05	AT1G06650	0	2-oxoglutarate (2OG) and Fe(II)-dependent oxygenase superfamily protein
Carubv10012295m.g	-2.21387	0.0527625	AT1G06650	0	2-oxoglutarate (2OG) and Fe(II)-dependent oxygenase superfamily protein
Carubv10012445m.g	-0.910253	0.00680257	AT1G06660	0	0
Carubv10011734m.g	0.242427	0.287328	AT1G06670	NIH	nuclear DEIH-boxhelicase
Carubv10011102m.g	0.307728	0.436167	AT1G06680	OE23,OEE2,PSBP-1,PSII-P	photosystem II subunit P-1
Carubv10011808m.g	0.25414	0.681082	AT1G06690	0	NAD(P)-linked oxidoreductase superfamily protein
Carubv10009518m.g	0.369412	0.119165	AT1G06700	0	Protein kinase superfamily protein
Carubv10008194m.g	0.256824	0.47486	AT1G06710	0	Tetratricopeptide repeat (TPR)-like superfamily protein
Carubv10012207m.g	1.14125	7.94716e-07	AT1G06720	0	P-loop containing nucleoside triphosphate hydrolases superfamily protein
Carubv10008753m.g	0.0868159	0.765672	AT1G06730	0	pfkB-like carbohydrate kinase family protein
Carubv10008416m.g	0.810262	0.0139917	AT1G64260	0	MuDR family transposase
Carubv10011536m.g	-0.0676532	0.941894	AT1G06750	0	P-loop containing nucleoside triphosphate hydrolases superfamily protein
Carubv10009975m.g	0.0437359	0.864056	AT2G30620	0	winged-helix DNA-binding transcription factor family protein
Carubv10009276m.g	0.287573	0.179552	AT1G06770	DRIP1	DREB2A-interacting protein 1
Carubv10008650m.g	-0.334342	0.129912	AT1G06780	GAUT6	galacturonosyltransferase 6
Carubv10011131m.g	-0.0493193	0.886396	AT1G06790	0	RNA polymerase Rpb7 N-terminal domain-containing protein
Carubv10008898m.g	-1.67836	6.0143e-05	AT1G06800	PLA-I{gamma}1	alpha/beta-Hydrolases superfamily protein
Carubv10008639m.g	0.312699	0.258836	AT1G06820	CCR2,CRTISO	carotenoid isomerase
Carubv10011626m.g	0.0537316	NA	AT1G06830	0	Glutaredoxin family protein
Carubv10008222m.g	-0.890923	0.0217375	AT1G06840	0	Leucine-rich repeat protein kinase family protein
Carubv10009673m.g	-2.13481	1.27558e-18	AT1G06850	AtbZIP52,bZIP52	basic leucine-zipper 52
Carubv10009515m.g	-0.54508	0.0188991	AT1G06870	0	Peptidase S24/S26A/S26B/S26C family protein
Carubv10009574m.g	-0.551418	0.0133989	AT1G06890	0	nodulin MtN21 /EamA-like transporter family protein
Carubv10012025m.g	-0.321514	0.132876	AT1G06900	0	Insulinase (Peptidase family M16) family protein
Carubv10011115m.g	-0.271042	0.492287	AT1G06910	TRFL7	TRF-like 7
Carubv10011767m.g	-1.04036	0.490877	AT1G06920	ATOFP4,OFP4	ovate family protein 4
Carubv10011424m.g	0.0537316	NA	AT1G06923	0	0
Carubv10011615m.g	0.827988	NA	AT1G06930	0	0
Carubv10008186m.g	0.832993	1.5828e-06	AT1G06950	ATTIC110,TIC110	translocon at the inner envelope membrane of chloroplasts 110
Carubv10010209m.g	0.986242	0.0158068	AT1G06960	0	RNA-binding (RRM/RBD/RNP motifs) family protein
Carubv10012328m.g	0.16561	0.917482	AT1G06980	0	0
Carubv10012021m.g	3.35001	0.000109704	AT1G06990	0	GDSL-like Lipase/Acylhydrolase superfamily protein
Carubv10011870m.g	0.460165	0.148911	AT1G07000	ATEXO70B2,EXO70B2	exocyst subunit exo70 family protein B2
Carubv10011512m.g	3.55153	0.00623641	AT2G30210	LAC3	laccase 3
Carubv10012402m.g	0.88824	0.0029161	AT1G07010	0	Calcineurin-like metallo-phosphoesterase superfamily protein
Carubv10012654m.g	0.385176	0.217679	AT1G07020	0	0
Carubv10011609m.g	0.924883	0.00266299	AT1G07030	0	Mitochondrial substrate carrier family protein
Carubv10012278m.g	-1.45516	1.60222e-11	AT1G07040	0	0
Carubv10011200m.g	0.052138	NA	AT1G07050	0	CCT motif family protein
Carubv10010114m.g	0.771405	0.407357	AT1G07060	0	0
Carubv10010028m.g	-2.52263	3.45701e-34	AT1G07080	0	Thioredoxin superfamily protein
Carubv10010340m.g	-1.96722	2.5405e-25	AT1G07090	LSH6	Protein of unknown function (DUF640)
Carubv10012057m.g	-0.66499	0.00053561	AT1G07110	ATF2KP,F2KP,FKFBP	fructose-2,6-bisphosphatase
Carubv10012267m.g	2.32715	0.0070892	AT1G07120	0	0
Carubv10010524m.g	1.21989	0.00981738	AT1G07130	ATSTN1,STN1	Nucleic acid-binding, OB-fold-like protein
Carubv10011181m.g	0.34701	NA	AT1G07135	0	glycine-rich protein
Carubv10010221m.g	0.0134558	0.959238	AT1G07140	SIRANBP	Pleckstrin homology (PH) domain superfamily protein
Carubv10008850m.g	-0.898604	0.465192	AT1G07150	MAPKKK13	mitogen-activated protein kinase kinase kinase 13
Carubv10009317m.g	0.346952	0.872253	AT1G07160	0	Protein phosphatase 2C family protein
Carubv10010703m.g	1.90024	5.54266e-10	AT1G07170	0	PHF5-like protein
Carubv10012404m.g	-0.434189	0.798739	AT1G07175	0	0
Carubv10008908m.g	2.58377	0.000725188	AT1G07180	ATNDI1,NDA1	alternative NAD(P)H dehydrogenase 1
Carubv10008201m.g	0.0537316	NA	AT1G07200	0	Double Clp-N motif-containing P-loop nucleoside triphosphate hydrolases superfamily protein
Carubv10009750m.g	0.528561	0.0558302	AT1G07210	0	Ribosomal protein S18
Carubv10008891m.g	1.41899	8.20435e-06	AT1G07220	0	Arabidopsis thaliana protein of unknown function (DUF821)
Carubv10008826m.g	-1.09395	1.84861e-07	AT1G07230	NPC1	non-specific phospholipase C1
Carubv10009037m.g	0.538869	0.789506	AT1G07240	UGT71C5	UDP-glucosyl transferase 71C5
Carubv10009025m.g	0.133314	0.682468	AT1G07250	UGT71C4	UDP-glucosyl transferase 71C4
Carubv10009021m.g	3.08334	7.13856e-30	AT1G07260	UGT71C3	UDP-glucosyl transferase 71C3
Carubv10008935m.g	1.22071	0.0211859	AT1G07270	0	Cell division control, Cdc6
Carubv10008793m.g	-0.306037	0.482092	AT1G07280	0	Tetratricopeptide repeat (TPR)-like superfamily protein
Carubv10009481m.g	-2.67849	9.76565e-08	AT1G07290	GONST2	golgi nucleotide sugar transporter 2
Carubv10011953m.g	0.0537316	NA	AT1G07300	0	josephin protein-related
Carubv10009572m.g	0.806625	NA	AT1G07310	0	Calcium-dependent lipid-binding (CaLB domain) family protein
Carubv10009944m.g	-0.064672	0.946593	AT1G07320	RPL4	ribosomal protein L4
Carubv10011307m.g	0.315097	0.812388	AT1G07330	0	0
Carubv10008940m.g	0.410207	NA	AT1G07340	ATSTP2,STP2	sugar transporter 2
Carubv10009665m.g	-0.303977	0.374328	AT1G07350	0	RNA-binding (RRM/RBD/RNP motifs) family protein
Carubv10008917m.g	0.117258	0.608979	AT1G07360	0	CCCH-type zinc fingerfamily protein with RNA-binding domain
Carubv10012643m.g	-0.477707	NA	AT1G07370	ATPCNA1,PCNA1	proliferating cellular nuclear antigen 1
Carubv10008356m.g	-0.404958	0.0981313	AT1G07380	0	Neutral/alkaline non-lysosomal ceramidase
Carubv10008151m.g	-0.601384	0.165737	AT1G07390	AtRLP1,RLP1	receptor like protein 1
Carubv10010535m.g	-0.20261	0.686606	AT1G07400	0	HSP20-like chaperones superfamily protein
Carubv10010276m.g	-0.56741	0.0127865	AT1G07410	ATRAB-A2B,ATRABA2B,RAB-A2B,RABA2b	RAB GTPase homolog A2B
Carubv10009860m.g	0.0735931	0.832129	AT1G07420	ATSMO2,SMO2-1	sterol 4-alpha-methyl-oxidase 2-1
Carubv10009150m.g	-0.148548	0.911414	AT1G07430	HAI2	highly ABA-induced PP2C gene 2
Carubv10010021m.g	-1.49684	0.00121831	AT1G07440	0	NAD(P)-binding Rossmann-fold superfamily protein
Carubv10010864m.g	-0.347642	NA	AT1G07460	0	Concanavalin A-like lectin family protein
Carubv10009468m.g	0.0049694	0.986947	AT1G07480	0	Transcription factor IIA, alpha/beta subunit
Carubv10012574m.g	1.09642	0.416158	AT1G07473	0	0
Carubv10011633m.g	-0.991678	0.575897	AT1G07476	0	0
Carubv10009471m.g	-0.0574834	0.853813	AT1G07480	0	Transcription factor IIA, alpha/beta subunit
Carubv10011490m.g	0.0537316	NA	AT1G07490	DVL9,RTFL3	ROTUNDIFOLIA like 3
Carubv10011564m.g	2.4678	0.105141	AT5G02220	0	0
Carubv10008328m.g	-0.554387	0.0102794	AT1G07510	ftsh10	FTSH protease 10
Carubv10010943m.g	0.637563	0.245803	AT1G07520	0	GRAS family transcription factor
Carubv10008391m.g	0.225667	0.314405	AT1G07530	ATGRAS2,GRAS2,SCL14	SCARECROW-like 14
Carubv10011259m.g	1.71173	0.143586	AT1G07540	TRFL2	TRF-like 2
Carubv10011886m.g	0.314652	NA	AT2G14510	0	Leucine-rich repeat protein kinase family protein
Carubv10011370m.g	0.548943	NA	AT2G14510	0	Leucine-rich repeat protein kinase family protein
Carubv10011533m.g	0.0537316	NA	AT1G07560	0	Leucine-rich repeat protein kinase family protein
Carubv10009302m.g	0.832307	0.000304365	AT1G07570	APK1,APK1A	Protein kinase superfamily protein
Carubv10008810m.g	0.644201	0.0755905	AT1G07590	0	Tetratricopeptide repeat (TPR)-like superfamily protein
Carubv10011048m.g	-1.3637	0.000209173	AT1G07610	MT1C	metallothionein 1C
Carubv10008970m.g	1.02211	0.000472641	AT1G07615	0	GTP-binding protein Obg/CgtA
Carubv10008702m.g	-1.20824	0.342431	AT1G07620	ATOBGM	GTP-binding protein Obg/CgtA
Carubv10008517m.g	-1.51892	3.57984e-15	AT1G07630	PLL5	pol-like 5
Carubv10011378m.g	1.2722	0.000194177	AT1G07640	OBP2	Dof-type zinc finger DNA-binding family protein
Carubv10008366m.g	1.5194	1.2522e-05	AT1G07650	0	Leucine-rich repeat transmembrane protein kinase
Carubv10012292m.g	-0.525569	0.77797	AT1G07645	ATDSI-1VOC,DSI-1VOC	dessication-induced 1VOC superfamily protein
Carubv10010719m.g	-0.530829	0.120059	AT1G07820	0	Histone superfamily protein
Carubv10010132m.g	-1.39036	6.08679e-10	AT2G27260	0	Late embryogenesis abundant (LEA) hydroxyproline-rich glycoprotein family
Carubv10008142m.g	-0.231754	0.344806	AT1G07670	ATECA4,ECA4	endomembrane-type CA-ATPase 4
Carubv10012490m.g	1.92871	0.20278	AT1G07680	0	0
Carubv10010444m.g	5.15424	1.267e-08	AT1G07690	0	0
Carubv10010324m.g	-0.00680393	0.989646	AT1G07700	0	Thioredoxin superfamily protein
Carubv10008611m.g	0.179427	0.442423	AT1G07705	0	NOT2 / NOT3 / NOT5 family
Carubv10012363m.g	1.80695	0.04882	AT1G07710	0	Ankyrin repeat family protein
Carubv10011152m.g	-3.18656	2.8781e-38	AT1G07720	KCS3	3-ketoacyl-CoA synthase 3
Carubv10011844m.g	-2.58683	1.71643e-07	AT1G07725	ATEXO70H6,EXO70H6	exocyst subunit exo70 family protein H6
Carubv10009852m.g	1.38115	0.000188671	AT1G07745	ATRAD51D,RAD51D,SSN1	homolog of RAD51 D
Carubv10011199m.g	-0.685412	0.175124	AT1G43666	0	Bifunctional inhibitor/lipid-transfer protein/seed storage 2S albumin superfamily protein
Carubv10011969m.g	4.35275	NA	AT1G07747	0	Bifunctional inhibitor/lipid-transfer protein/seed storage 2S albumin superfamily protein
Carubv10009562m.g	-0.185581	0.454768	AT1G07750	0	RmlC-like cupins superfamily protein
Carubv10010804m.g	-3.26044	2.17957e-21	0	0	0
Carubv10010626m.g	0.864599	0.00250092	AT1G07770	RPS15A	ribosomal protein S15A
Carubv10010582m.g	0.125062	0.605435	AT1G07790	HTB1	Histone superfamily protein
Carubv10010697m.g	-4.0442	9.55801e-44	AT1G07795	0	0
Carubv10010716m.g	-0.367977	0.193156	AT1G07820	0	Histone superfamily protein
Carubv10009657m.g	0.0284134	0.921046	AT1G07840	0	Sas10/Utp3/C1D family
Carubv10011500m.g	2.13569	0.196651	AT1G07850	0	Protein of unknown function (DUF604)
Carubv10008692m.g	-0.267396	0.364729	AT1G07870	0	Protein kinase superfamily protein
Carubv10010840m.g	1.32073	0.0377603	AT1G07880	ATMPK13	Protein kinase superfamily protein
Carubv10009719m.g	0.83853	0.000764466	AT1G07890	APX1,ATAPX01,ATAPX1,CS1,MEE6	ascorbate peroxidase 1
Carubv10010390m.g	0.0537316	NA	AT1G07900	LBD1	LOB domain-containing protein 1
Carubv10008126m.g	-0.00889551	0.970968	AT1G07910	ATRNL,RNL	RNAligase
Carubv10009637m.g	-0.136392	0.574562	AT1G07930	0	GTP binding Elongation factor Tu family protein
Carubv10009294m.g	-0.62098	0.00126534	AT1G07940	0	GTP binding Elongation factor Tu family protein
Carubv10011249m.g	0.0136798	0.955196	AT1G07940	0	GTP binding Elongation factor Tu family protein
Carubv10010175m.g	-0.220671	0.883113	AT5G41270	0	0
Carubv10010522m.g	1.20947	0.00026076	AT1G07950	MED22B	Surfeit locus protein 5 subunit 22 of Mediator complex
Carubv10010571m.g	1.50122	3.42099e-09	AT1G07960	ATPDIL5-1,PDIL5-1	PDI-like 5-1
Carubv10008478m.g	0.536576	0.0416697	AT1G07970	0	0
Carubv10009702m.g	-0.162767	0.567808	AT1G07985	0	Expressed protein
Carubv10011058m.g	-0.374601	0.0826378	AT1G07990	0	SIT4 phosphatase-associated family protein
Carubv10009871m.g	0.189643	0.530621	AT1G08010	GATA11	GATA transcription factor 11
Carubv10011453m.g	0.329074	0.266017	AT1G08030	TPST	tyrosylprotein sulfotransferase
Carubv10012236m.g	0.0543912	0.951369	AT1G08035	0	0
Carubv10010995m.g	0.653822	0.0392816	AT1G08040	0	Protein of unknown function (DUF707)
Carubv10008075m.g	-0.555027	0.00305449	AT1G08060	MOM,MOM1	ATP-dependent helicase family protein
Carubv10012428m.g	0.0537316	NA	AT1G08065	ACA5,ATACA5	alpha carbonic anhydrase 5
Carubv10008399m.g	1.01836	0.0855401	AT1G08070	OTP82	Tetratricopeptide repeat (TPR)-like superfamily protein
Carubv10012300m.g	-1.0035	0.456981	AT1G08080	ACA7,ATACA7	alpha carbonic anhydrase 7
Carubv10008824m.g	0.965505	0.625318	AT1G08090	ACH1,ATNRT2.1,ATNRT2:1,LIN1,NRT2,NRT2.1,NRT2:1,NRT2;1AT	nitrate transporter 2:1
Carubv10011028m.g	0.0440971	0.986219	AT1G08090	ACH1,ATNRT2.1,ATNRT2:1,LIN1,NRT2,NRT2.1,NRT2:1,NRT2;1AT	nitrate transporter 2:1
Carubv10010424m.g	1.3623	1.52367e-05	AT1G08110	0	lactoylglutathione lyase family protein / glyoxalase I family protein
Carubv10009772m.g	1.07885	1.98953e-05	AT1G08125	0	S-adenosyl-L-methionine-dependent methyltransferases superfamily protein
Carubv10008341m.g	-0.478196	0.0120448	AT1G08130	ATLIG1,LIG1	DNA ligase 1
Carubv10012226m.g	0.398993	0.845604	AT1G08135	ATCHX6B,CHX6B	cation/H+ exchanger 6B
Carubv10012247m.g	-1.80858	0.0248508	AT1G08140	ATCHX6A,CHX6A	cation/H+ exchanger 6A
Carubv10012128m.g	-1.52365	0.180132	AT1G08150	ATCHX5,CHX5	Cation/hydrogen exchanger family protein
Carubv10010243m.g	0.0527611	NA	AT1G08160	0	Late embryogenesis abundant (LEA) hydroxyproline-rich glycoprotein family
Carubv10011530m.g	-5.45988	1.84335e-25	AT1G08170	0	Histone superfamily protein
Carubv10010984m.g	1.63929	0.00354763	AT1G08180	0	0
Carubv10011806m.g	-0.126675	0.638329	AT1G08190	ATVAM2,ATVPS41,VAM2,VPS41,ZIP2	vacuolar protein sorting 41
Carubv10009400m.g	-0.0492921	0.823396	AT1G08200	AXS2	UDP-D-apiose/UDP-D-xylose synthase 2
Carubv10008955m.g	0.222981	0.553794	AT1G08210	0	Eukaryotic aspartyl protease family protein
Carubv10009984m.g	-0.221285	0.548498	AT1G08220	0	0
Carubv10009101m.g	-0.466653	0.711106	AT1G08230	ATGAT1,GAT1	Transmembrane amino acid transporter family protein
Carubv10012370m.g	0.0680159	0.815395	AT1G08250	ADT6	arogenate dehydratase 6
Carubv10008067m.g	-0.735063	0.000106433	AT1G08260	ABO4,EMB142,EMB2284,EMB529,ESD7,POL2A,TIL1	DNA polymerase epsilon catalytic subunit
Carubv10009362m.g	-5.71455	2.26709e-98	AT1G08280	0	Glycosyltransferase family 29 (sialyltransferase) family protein
Carubv10009617m.g	-0.512531	0.64309	AT1G08290	WIP3	WIP domain protein 3
Carubv10011774m.g	2.10687	0.0119676	AT1G08300	NVL	no vein-like
Carubv10010878m.g	-0.605971	0.733761	AT1G08310	0	alpha/beta-Hydrolases superfamily protein
Carubv10011052m.g	-0.431262	0.169114	AT1G08315	0	ARM repeat superfamily protein
Carubv10011576m.g	-5.53546	3.75462e-10	AT1G08320	bZIP21,TGA9	bZIP transcription factor family protein
Carubv10009491m.g	-2.38336	0.131479	AT1G08340	0	Rho GTPase activating protein with PAK-box/P21-Rho-binding domain
Carubv10008667m.g	1.02741	0.00117279	AT1G08350	0	Endomembrane protein 70 protein family
Carubv10010278m.g	0.681937	0.00168018	AT1G08360	0	Ribosomal protein L1p/L10e family
Carubv10009516m.g	-0.585786	0.00549129	AT1G08370	ATDCP1,DCP1	decapping 1
Carubv10010597m.g	-0.435264	0.298522	AT1G08380	PSAO	photosystem I subunit O
Carubv10010612m.g	0.0537316	NA	AT1G08390	0	0
Carubv10008321m.g	-0.492419	0.789309	AT1G08400	0	RINT-1 / TIP-1 family
Carubv10012258m.g	0.335516	0.154847	AT1G08410	0	P-loop containing nucleoside triphosphate hydrolases superfamily protein
Carubv10008182m.g	0.0952351	0.69515	AT1G08420	BSL2	BRI1 suppressor 1 (BSU1)-like 2
Carubv10012224m.g	9.27862	1.73595e-11	AT1G08430	ALMT1,ATALMT1	aluminum-activated malate transporter 1
Carubv10011859m.g	0.45689	0.841883	AT1G08440	0	Aluminium activated malate transporter family protein
Carubv10009219m.g	0.874933	0.00142354	AT1G08450	AtCRT3,CRT3,EBS2,PSL1	calreticulin 3
Carubv10009385m.g	-1.90381	6.02971e-14	AT1G08460	ATHDA8,HDA08,HDA8	histone deacetylase 8
Carubv10010384m.g	2.51273	0.000846045	AT1G08465	YAB2	Plant-specific transcription factor YABBY family protein
Carubv10011803m.g	0.0537316	NA	0	0	0
Carubv10009397m.g	0.0537316	NA	AT1G08470	SSL3	strictosidine synthase-like 3
Carubv10010583m.g	-0.438807	0.163559	AT1G08480	0	0
Carubv10012604m.g	0.485599	0.06327	AT1G08490	ATCPNIFS,ATNFS2,ATSUFS,CPNIFS,SUFS	chloroplastic NIFS-like cysteine desulfurase
Carubv10010188m.g	-9.15054	2.0041e-23	AT1G08500	AtENODL18,ENODL18	early nodulin-like protein 18
Carubv10009296m.g	-2.25599	4.93395e-38	AT1G08510	FATB	fatty acyl-ACP thioesterases B
Carubv10008387m.g	0.985081	0.0004107	AT1G08520	ALB-1V,ALB1,CHLD,PDE166,V157	ALBINA 1
Carubv10010041m.g	-0.302009	0.394852	AT1G08530	0	0
Carubv10008711m.g	0.437131	0.0778527	AT1G08540	ABC1,ATSIG1,ATSIG2,SIG1,SIG2,SIGA,SIGB	RNApolymerase sigma subunit 2
Carubv10009082m.g	0.0777926	0.873977	AT1G08550	AVDE1,NPQ1	non-photochemical quenching 1
Carubv10012277m.g	0.0537316	NA	AT1G08560	ATSYP111,KN,SYP111	syntaxin of plants 111
Carubv10009966m.g	-0.91555	0.000193918	AT1G08570	ACHT4	atypical CYS HIS rich thioredoxin 4
Carubv10010661m.g	0.582585	0.0162722	AT1G08580	0	0
Carubv10008171m.g	-1.60284	8.65097e-11	AT1G08590	0	Leucine-rich receptor-like protein kinase family protein
Carubv10011116m.g	0.655234	0.000573816	AT1G08600	ATRX,CHR20	P-loop containing nucleoside triphosphate hydrolases superfamily protein
Carubv10012539m.g	1.5413	7.75642e-05	AT1G08610	0	Pentatricopeptide repeat (PPR) superfamily protein
Carubv10008112m.g	-0.241097	0.212216	AT1G08620	PKDM7D	Transcription factor jumonji (jmj) family protein / zinc finger (C5HC2 type) family protein
Carubv10009546m.g	-3.0562	3.09983e-19	AT1G08630	THA1	threonine aldolase 1
Carubv10009875m.g	-0.851009	2.56771e-05	AT1G08640	CJD1	Chloroplast J-like domain 1
Carubv10009932m.g	-0.741799	0.000972106	AT1G08650	ATPPCK1,PPCK1	phosphoenolpyruvate carboxylase kinase 1
Carubv10009038m.g	-1.003	3.8294e-06	AT1G08660	MGP2	MALE GAMETOPHYTE DEFECTIVE 2
Carubv10011520m.g	0.40981	NA	AT1G08670	0	ENTH/VHS family protein
Carubv10008548m.g	-0.517746	0.0254828	AT1G08680	AGD14,ZIGA4	ARF GAP-like zinc finger-containing protein ZIGA4
Carubv10009057m.g	0.367627	0.147134	AT1G08700	PS1	Presenilin-1
Carubv10009806m.g	0.0245667	0.969034	AT1G08710	0	F-box family protein
Carubv10008230m.g	-0.458661	0.0476976	AT1G08720	ATEDR1,EDR1	Protein kinase superfamily protein
Carubv10011892m.g	1.40729	0.00748937	AT1G08730	ATXIC,XIC	Myosin family protein with Dil domain
Carubv10009426m.g	-1.3904	8.81385e-09	AT1G08750	0	Peptidase C13 family
Carubv10010792m.g	3.9266	0.000385515	0	0	0
Carubv10008392m.g	-1.19547	6.31271e-07	AT1G08760	0	Plant protein of unknown function (DUF936)
Carubv10010304m.g	-0.475642	0.0469844	AT1G08770	PRA1.E	prenylated RAB acceptor 1.E
Carubv10010510m.g	-0.308706	0.315678	AT1G08780	AIP3,PFD4	ABI3-interacting protein 3
Carubv10011157m.g	-0.374373	NA	AT1G08790	0	Protein of unknown function (DUF1685)
Carubv10008154m.g	-1.30626	1.8216e-10	AT1G08800	0	Protein of unknown function, DUF593
Carubv10009957m.g	-1.14587	3.48109e-06	AT1G08810	AtMYB60,MYB60	myb domain protein 60
Carubv10009369m.g	0.499952	0.0431396	AT1G08820	VAP27-2	vamp/synaptobrevin-associated protein 27-2
Carubv10012032m.g	0.691279	NA	AT1G08695	SCRL3	SCR-like 3
Carubv10010551m.g	0.226486	0.326703	AT1G08830	CSD1	copper/zinc superoxide dismutase 1
Carubv10011024m.g	1.25373	1.04191e-06	AT1G08840	emb2411	DNA replication helicase, putative
Carubv10010378m.g	-0.45206	0.11828	AT1G08845	0	Ribosomal L18p/L5e family protein
Carubv10008668m.g	-0.275997	0.283751	AT1G08860	BON3	Calcium-dependent phospholipid-binding Copine family protein
Carubv10010499m.g	-0.119784	0.742422	AT1G08880	G-H2AX,GAMMA-H2AX,H2AXA,HTA5	Histone superfamily protein
Carubv10012279m.g	0.57503	0.697405	AT1G08890	0	Major facilitator superfamily protein
Carubv10008291m.g	0.463446	0.0840568	AT1G08910	EMB3001	zinc ion binding;zinc ion binding
Carubv10010993m.g	-2.15437	0.011743	AT1G08920	ESL1	ERD (early response to dehydration) six-like 1
Carubv10009965m.g	0.105253	0.905679	AT1G08940	0	Phosphoglycerate mutase family protein
Carubv10008760m.g	-1.26973	4.58206e-05	AT1G08960	ATCAX11,CAX11	cation exchanger 11
Carubv10010196m.g	-0.421498	0.0681001	AT1G08970	HAP5C,NF-YC9	nuclear factor Y, subunit C9
Carubv10009223m.g	-0.502469	0.167875	AT1G08980	AMI1,ATAMI1,ATTOC64-I,TOC64-I	amidase 1
Carubv10012670m.g	2.91122	6.50031e-05	AT1G08980	AMI1,ATAMI1,ATTOC64-I,TOC64-I	amidase 1
Carubv10011725m.g	-1.70001	6.63063e-12	AT1G08990	PGSIP5	plant glycogenin-like starch initiation protein 5
Carubv10011475m.g	0.197569	0.486095	AT1G09000	ANP1,MAPKKK1,NP1	NPK1-related protein kinase 1
Carubv10008228m.g	-0.337719	0.279036	AT1G09010	0	glycoside hydrolase family 2 protein
Carubv10008946m.g	-0.381888	0.0621832	AT1G09020	ATSNF4,SNF4	homolog of yeast sucrose nonfermenting 4
Carubv10011185m.g	0.0515295	NA	AT1G09030	NF-YB4	nuclear factor Y, subunit B4
Carubv10012573m.g	-0.317435	0.281414	AT1G09040	0	0
Carubv10011895m.g	0.196451	0.32302	AT1G09060	0	Zinc finger, RING-type;Transcription factor jumonji/aspartyl beta-hydroxylase
Carubv10009766m.g	1.60741	4.94874e-09	AT1G09070	(AT)SRC2,SRC2	soybean gene regulated by cold-2
Carubv10008520m.g	0.818858	0.263601	AT1G09080	BIP3	Heat shock protein 70 (Hsp 70) family protein
Carubv10008289m.g	1.68878	0.293319	AT1G09090	ATRBOHB,ATRBOHB-BETA,RBOHB	respiratory burst oxidase homolog B
Carubv10011543m.g	0.306067	0.150972	AT1G09130	0	ATP-dependent caseinolytic (Clp) protease/crotonase family protein
Carubv10009803m.g	-1.13892	4.26641e-07	AT1G09140	ATSRP30,ATSRP30.1,ATSRP30.2	SERINE-ARGININE PROTEIN 30
Carubv10010413m.g	-0.4327	0.0800946	AT1G09150	0	pseudouridine synthase and archaeosine transglycosylase (PUA) domain-containing protein
Carubv10009939m.g	0.733083	NA	AT1G09155	AtPP2-B15,PP2-B15	phloem protein 2-B15
Carubv10009213m.g	0.0325592	0.900876	AT1G09160	0	Protein phosphatase 2C family protein
Carubv10011730m.g	-1.12343	0.524583	AT1G09170	0	P-loop nucleoside triphosphate hydrolases superfamily protein with CH (Calponin Homology) domain
Carubv10010383m.g	-0.904537	2.62244e-05	AT1G56330	ATSAR1,ATSAR1B,ATSARA1B,SAR1,SAR1B	secretion-associated RAS 1B
Carubv10012008m.g	0.12711	0.812167	AT1G09190	0	Tetratricopeptide repeat (TPR)-like superfamily protein
Carubv10011869m.g	-1.05625	7.06816e-07	AT1G09195	0	0
Carubv10011755m.g	-0.136305	0.630203	AT5G10400	0	Histone superfamily protein
Carubv10012218m.g	0.0572642	0.839722	AT1G09210	AtCRT1b,CRT1b	calreticulin 1b
Carubv10011053m.g	0.34861	0.202465	AT1G09210	AtCRT1b,CRT1b	calreticulin 1b
Carubv10011104m.g	0.0537316	NA	AT1G09220	0	Pentatricopeptide repeat (PPR) superfamily protein
Carubv10010165m.g	0.943173	0.113692	AT1G08860	BON3	Calcium-dependent phospholipid-binding Copine family protein
Carubv10012313m.g	0.622877	0.300611	AT1G09220	0	Pentatricopeptide repeat (PPR) superfamily protein
Carubv10011629m.g	0.416554	0.215978	AT1G09230	0	RNA-binding (RRM/RBD/RNP motifs) family protein
Carubv10009752m.g	-0.0159592	NA	AT1G09240	ATNAS3,NAS3	nicotianamine synthase 3
Carubv10010033m.g	0.208297	0.457818	AT1G56450	PBG1	20S proteasome beta subunit G1
Carubv10010314m.g	-3.76698	6.55638e-09	AT1G09250	0	basic helix-loop-helix (bHLH) DNA-binding superfamily protein
Carubv10011976m.g	-0.981506	1.40593e-06	AT1G09270	IMPA-4	importin alpha isoform 4
Carubv10012485m.g	0.91145	8.4802e-05	AT1G09280	0	0
Carubv10009568m.g	0.222182	0.589315	AT1G09290	0	0
Carubv10009008m.g	-0.0718536	0.812167	AT1G09300	0	Metallopeptidase M24 family protein
Carubv10010410m.g	-5.00975	4.39533e-32	AT1G09310	0	Protein of unknown function, DUF538
Carubv10008882m.g	0.291952	0.418806	AT1G09320	ADCP1	agenet domain-containing protein
Carubv10012409m.g	0.0537316	NA	AT1G09330	0	0
Carubv10009455m.g	-0.763595	3.03779e-05	AT1G09340	CRB,CSP41B	chloroplast RNA binding
Carubv10009676m.g	0.0493898	NA	AT1G09350	AtGolS3,GolS3	galactinol synthase 3
Carubv10011513m.g	6.39176	3.08018e-09	AT1G09360	0	Plant invertase/pectin methylesterase inhibitor superfamily protein
Carubv10010434m.g	3.10208	1.06154e-14	AT1G09370	0	Plant invertase/pectin methylesterase inhibitor superfamily protein
Carubv10009476m.g	-1.9689	4.11245e-07	AT1G09380	0	nodulin MtN21 /EamA-like transporter family protein
Carubv10011694m.g	2.95317	1.98791e-14	AT1G09390	0	GDSL-like Lipase/Acylhydrolase superfamily protein
Carubv10009647m.g	-1.94586	0.000103408	AT1G09400	0	FMN-linked oxidoreductases superfamily protein
Carubv10010860m.g	-0.904048	0.391694	AT1G09415	NIMIN-3	NIM1-interacting 3
Carubv10011205m.g	-0.0830745	0.813104	AT1G09420	G6PD4	glucose-6-phosphate dehydrogenase 4
Carubv10009231m.g	-0.5643	0.0216169	AT1G09430	ACLA-3	ATP-citrate lyase A-3
Carubv10009469m.g	0.36922	0.376436	AT1G09440	0	Protein kinase superfamily protein
Carubv10008644m.g	-0.254869	0.419283	AT1G09450	0	Protein kinase superfamily protein
Carubv10009486m.g	0.45924	NA	AT1G09460	0	Carbohydrate-binding X8 domain superfamily protein
Carubv10009671m.g	0.212019	0.790915	AT1G09470	0	0
Carubv10009753m.g	-5.64847	1.23316e-10	AT1G09480	0	NAD(P)-binding Rossmann-fold superfamily protein
Carubv10009736m.g	1.56841	0.133389	AT1G09500	0	NAD(P)-binding Rossmann-fold superfamily protein
Carubv10011960m.g	2.15705	1.3215e-06	AT1G09510	0	NAD(P)-binding Rossmann-fold superfamily protein
Carubv10012528m.g	0.512739	0.105672	AT1G09520	0	0
Carubv10008815m.g	-0.481886	0.66777	AT1G09530	PAP3,PIF3,POC1	phytochrome interacting factor 3
Carubv10009497m.g	-1.99677	3.70188e-17	AT1G09540	ATMYB61,MYB61	myb domain protein 61
Carubv10011324m.g	7.60891	NA	AT1G09550	0	Pectinacetylesterase family protein
Carubv10010233m.g	-1.54103	5.54809e-10	AT1G09560	GLP5	germin-like protein 5
Carubv10008141m.g	-0.787455	0.00132619	AT1G09570	FHY2,FRE1,HY8,PHYA	phytochrome A
Carubv10009897m.g	-2.13398	3.01595e-15	AT1G09575	0	Protein of unknown function (DUF607)
Carubv10010159m.g	0.686089	0.0346204	AT1G09580	0	emp24/gp25L/p24 family/GOLD family protein
Carubv10010498m.g	0.685404	0.0566794	AT1G09590	0	Translation protein SH3-like family protein
Carubv10008488m.g	-0.382354	0.453343	AT1G09600	0	Protein kinase superfamily protein
Carubv10011736m.g	0.0537316	NA	AT1G09610	0	Protein of unknown function (DUF579)
Carubv10008148m.g	-0.452483	0.00184912	AT1G09620	0	ATP binding;leucine-tRNA ligases;aminoacyl-tRNA ligases;nucleotide binding;ATP binding;aminoacyl-tRNA ligases
Carubv10010267m.g	-1.1594	3.9546e-05	AT1G09630	ATRAB-A2A,ATRAB11C,ATRABA2A,RAB-A2A,RAB11c	RAB GTPase 11C
Carubv10009284m.g	-0.636879	0.00206068	AT1G09640	0	Translation elongation factor EF1B, gamma chain
Carubv10010723m.g	-1.30124	1.86745e-07	AT1G09645	0	0
Carubv10009882m.g	-0.735516	0.0224199	AT1G09660	0	RNA-binding KH domain-containing protein
Carubv10011501m.g	0.0537316	NA	AT1G09665	0	Toll-Interleukin-Resistance (TIR) domain family protein
Carubv10008618m.g	2.00056	3.04704e-05	AT1G09680	0	Pentatricopeptide repeat (PPR) superfamily protein
Carubv10010433m.g	0.0116965	0.971698	AT1G09590	0	Translation protein SH3-like family protein
Carubv10009604m.g	0.937513	0.00458866	AT1G09700	DRB1,HYL1	dsRNA-binding domain-like superfamily protein
Carubv10010985m.g	2.92652	2.68584e-05	AT1G09710	0	Homeodomain-like superfamily protein
Carubv10011130m.g	-0.781442	0.572123	AT1G09720	0	Kinase interacting (KIP1-like) family protein
Carubv10008238m.g	-0.7492	0.00014001	AT1G09730	0	Cysteine proteinases superfamily protein
Carubv10010470m.g	-1.28004	2.20893e-06	AT1G09740	0	Adenine nucleotide alpha hydrolases-like superfamily protein
Carubv10008880m.g	0.896842	0.00260473	AT1G09750	0	Eukaryotic aspartyl protease family protein
Carubv10012046m.g	0.359025	0.114925	AT1G09760	U2A\'	U2 small nuclear ribonucleoprotein A
Carubv10008427m.g	0.448226	0.103055	AT1G09770	ATCDC5,ATMYBCDC5,CDC5	cell division cycle 5
Carubv10008742m.g	0.0501018	NA	AT1G09780	0	Phosphoglycerate mutase, 2,3-bisphosphoglycerate-independent
Carubv10011331m.g	1.84411	0.0101093	AT1G09790	COBL6	COBRA-like protein 6 precursor
Carubv10011733m.g	0.453836	0.0502284	AT1G09795	ATATP-PRT2,ATP-PRT2,HISN1B	ATP phosphoribosyl transferase 2
Carubv10009493m.g	0.548071	0.105855	AT1G09800	0	Pseudouridine synthase family protein
Carubv10011018m.g	1.69086	4.58916e-07	AT1G09810	ECT11	evolutionarily conserved C-terminal region 11
Carubv10010622m.g	1.74275	0.282034	AT1G09812	0	0
Carubv10010654m.g	0.271775	0.45902	AT1G09815	POLD4	polymerase delta 4
Carubv10010987m.g	0.0537316	NA	AT1G09820	0	Pentatricopeptide repeat (PPR-like) superfamily protein
Carubv10008837m.g	0.332114	0.290305	AT1G09830	0	Glycinamide ribonucleotide (GAR) synthetase
Carubv10009250m.g	0.408594	0.0332681	AT1G09840	ATSK41,SK41	shaggy-like protein kinase 41
Carubv10009056m.g	-0.453122	0.216029	AT1G09850	XBCP3	xylem bark cysteine peptidase 3
Carubv10011209m.g	-2.1806	0.0888408	AT1G09860	ATPUP16,PUP16	purine permease 16
Carubv10008976m.g	-0.438871	0.132092	AT1G09870	0	histidine acid phosphatase family protein
Carubv10008518m.g	4.83915	6.0605e-34	AT1G09880	0	Rhamnogalacturonate lyase family protein
Carubv10010965m.g	0.122848	0.896528	AT1G09890	0	Rhamnogalacturonate lyase family protein
Carubv10011677m.g	0.0537316	NA	AT1G09900	0	Pentatricopeptide repeat (PPR-like) superfamily protein
Carubv10008508m.g	-0.343764	0.332764	AT1G09910	0	Rhamnogalacturonate lyase family protein
Carubv10010346m.g	-0.552166	0.0176375	AT1G09920	0	TRAF-type zinc finger-related
Carubv10011782m.g	5.20395	3.7711e-40	AT1G09930	ATOPT2,OPT2	oligopeptide transporter 2
Carubv10011217m.g	0.0537316	NA	AT1G09932	0	Phosphoglycerate mutase family protein
Carubv10011120m.g	0.0537316	NA	AT1G09935	0	Phosphoglycerate mutase family protein
Carubv10008813m.g	-0.0544464	0.840052	AT1G09940	HEMA2	Glutamyl-tRNA reductase family protein
Carubv10010176m.g	2.07898	2.22231e-06	AT1G09950	RAS1	RESPONSE TO ABA AND SALT 1
Carubv10008236m.g	3.83985	5.2286e-12	AT1G35660	0	0
Carubv10009920m.g	0.0537316	NA	0	0	0
Carubv10008327m.g	0.0537316	NA	AT5G35430	0	Tetratricopeptide repeat (TPR)-like superfamily protein
Carubv10008337m.g	3.64333	1.89605e-12	AT1G35660	0	0
Carubv10008890m.g	0.152384	0.636178	AT1G09960	ATSUC4,ATSUT4,SUC4,SUT4	sucrose transporter 4
Carubv10008210m.g	-1.63266	6.71258e-09	AT1G09970	LRR XI-23,RLK7	Leucine-rich receptor-like protein kinase family protein
Carubv10011744m.g	0.0411725	0.887591	AT1G09980	0	Putative serine esterase family protein
Carubv10009053m.g	1.97277	9.60121e-08	AT1G10010	AAP8,ATAAP8	amino acid permease 8
Carubv10012383m.g	6.2404	9.28611e-07	AT1G10010	AAP8,ATAAP8	amino acid permease 8
Carubv10009083m.g	-2.06577	1.83109e-15	AT1G10020	0	Protein of unknown function (DUF1005)
Carubv10010632m.g	-1.74651	0.000235053	AT1G10030	ERG28	homolog of yeast ergosterol28
Carubv10009269m.g	0.912259	0.12948	AT1G10040	0	alpha/beta-Hydrolases superfamily protein
Carubv10008147m.g	-1.14644	6.19483e-07	AT1G10050	0	glycosyl hydrolase family 10 protein / carbohydrate-binding domain-containing protein
Carubv10010964m.g	1.1923	0.00459967	AT1G10060	ATBCAT-1,BCAT-1	branched-chain amino acid transaminase 1
Carubv10009962m.g	0.530329	0.0617599	AT1G58983	0	Ribosomal protein S5 family protein
Carubv10009404m.g	-0.25599	NA	AT1G10070	ATBCAT-2,BCAT-2	branched-chain amino acid transaminase 2
Carubv10008381m.g	1.21975	0.00604934	AT1G10090	0	Early-responsive to dehydration stress protein (ERD4)
Carubv10009225m.g	-1.56363	4.84231e-08	AT1G10095	0	Protein prenylyltransferase superfamily protein
Carubv10009514m.g	0.614239	0.013864	AT1G10120	0	basic helix-loop-helix (bHLH) DNA-binding superfamily protein
Carubv10010701m.g	-0.759245	0.0978506	0	0	0
Carubv10008220m.g	-0.546691	0.011	AT1G10130	ATECA3,ECA3	endoplasmic reticulum-type calcium-transporting ATPase 3
Carubv10010449m.g	-0.765217	0.654531	AT1G10140	0	Uncharacterised conserved protein UCP031279
Carubv10009272m.g	-1.10719	3.09506e-05	AT1G10150	0	Carbohydrate-binding protein
Carubv10010397m.g	0.0151541	NA	AT1G10155	ATPP2-A10,PP2-A10	phloem protein 2-A10
Carubv10010627m.g	-0.574352	0.017502	0	0	0
Carubv10011742m.g	-0.291295	0.285663	AT1G10180	0	0
Carubv10010373m.g	-0.124163	0.722848	AT1G10200	WLIM1	GATA type zinc finger transcription factor family protein
Carubv10010274m.g	-0.980843	0.600908	AT1G59590	ZCF37	ZCF37
Carubv10010417m.g	0.372666	NA	AT1G10220	0	0
Carubv10010290m.g	1.02413	0.000118025	AT1G10230	ASK18,SK18	SKP1-like 18
Carubv10012599m.g	0.367974	0.16795	AT1G10240	FRS11	FAR1-related sequence 11
Carubv10012602m.g	0.533298	0.0258354	AT1G10270	GRP23	glutamine-rich protein 23
Carubv10012092m.g	-0.296899	0.448444	AT1G10280	0	Core-2/I-branching beta-1,6-N-acetylglucosaminyltransferase family protein
Carubv10008252m.g	-1.04592	1.49179e-07	AT1G10290	ADL6,DRP2A	dynamin-like protein 6
Carubv10011682m.g	-0.536928	0.0104282	AT5G53150	0	DNAJ heat shock N-terminal domain-containing protein
Carubv10012210m.g	2.37635	0.15846	AT1G10300	0	Nucleolar GTP-binding protein
Carubv10012297m.g	0.806625	NA	AT4G05350	0	RING/U-box superfamily protein
Carubv10011121m.g	1.94916	2.46785e-11	AT1G10310	0	NAD(P)-binding Rossmann-fold superfamily protein
Carubv10012360m.g	-0.266128	0.314116	AT1G10320	0	Zinc finger C-x8-C-x5-C-x3-H type family protein
Carubv10011208m.g	-0.272801	0.57654	AT1G10330	0	Tetratricopeptide repeat (TPR)-like superfamily protein
Carubv10010752m.g	-3.18896	1.48017e-08	0	0	0
Carubv10009603m.g	0.354813	0.298329	AT1G10350	0	DNAJ heat shock family protein
Carubv10010208m.g	0.405493	0.205012	AT1G10360	ATGSTU18,GST29,GSTU18	glutathione S-transferase TAU 18
Carubv10010042m.g	2.39642	7.35332e-12	AT1G10370	ATGSTU17,ERD9,GST30,GST30B	Glutathione S-transferase family protein
Carubv10009641m.g	-0.738944	0.424177	AT1G10380	0	Putative membrane lipoprotein
Carubv10012362m.g	-3.2106	3.44552e-16	AT1G10385	0	Vps51/Vps67 family (components of vesicular transport) protein
Carubv10008140m.g	-0.654673	0.000203018	AT1G10390	0	Nucleoporin autopeptidase
Carubv10012329m.g	0.372666	NA	AT1G10400	0	UDP-Glycosyltransferase superfamily protein
Carubv10011985m.g	-0.55264	0.0242333	AT1G10410	0	Protein of unknown function (DUF1336)
Carubv10009270m.g	-0.0654128	0.875414	AT1G10417	0	0
Carubv10011401m.g	-0.346012	0.166793	AT1G59820	ALA3	aminophospholipid ATPase 3
Carubv10009843m.g	-0.215732	0.538578	AT1G10430	PP2A-2	protein phosphatase 2A-2
Carubv10008167m.g	-0.547441	0.00500263	AT1G10450	SNL6	SIN3-like 6
Carubv10010030m.g	-0.564926	0.494967	AT1G10470	ARR4,ATRR1,IBC7,MEE7	response regulator 4
Carubv10012103m.g	0.0537316	NA	AT1G10480	ZFP5	zinc finger protein 5
Carubv10012139m.g	1.57186	1.94831e-15	AT1G10490	0	Domain of unknown function (DUF1726) ;Putative ATPase (DUF699)
Carubv10010414m.g	-0.418324	0.0908471	AT1G10500	ATCPISCA,CPISCA	chloroplast-localized ISCA-like protein
Carubv10012462m.g	-0.727103	0.0849559	AT1G10520	0	DNA polymerase lambda (POLL)
Carubv10010489m.g	0.0573781	NA	AT1G10530	0	0
Carubv10011003m.g	1.01904	0.000556931	AT1G10540	ATNAT8,NAT8	nucleobase-ascorbate transporter 8
Carubv10009787m.g	-0.800332	0.032122	AT1G10550	XET,XTH33	xyloglucan:xyloglucosyl transferase 33
Carubv10011817m.g	0.45924	NA	AT4G09545	0	ECA1 gametogenesis related family protein
Carubv10008393m.g	1.21063	0.0560345	AT1G10560	ATPUB18,PUB18	plant U-box 18
Carubv10011329m.g	-0.715623	0.0159588	AT1G10570	OTS2,ULP1C	Cysteine proteinases superfamily protein
Carubv10008709m.g	0.526129	0.0213419	AT1G10580	0	Transducin/WD40 repeat-like superfamily protein
Carubv10010416m.g	1.64914	0.362765	AT1G10585	0	basic helix-loop-helix (bHLH) DNA-binding superfamily protein
Carubv10011373m.g	0.0537316	NA	AT1G10586	0	basic helix-loop-helix (bHLH) DNA-binding superfamily protein
Carubv10012286m.g	1.93062	0.307244	AT1G10588	0	Gibberellin-regulated family protein
Carubv10010598m.g	-0.596808	0.0137459	AT1G10590	0	Nucleic acid-binding, OB-fold-like protein
Carubv10011162m.g	1.26414	7.74833e-05	AT1G10600	AMSH2	associated molecule with the SH3 domain of STAM 2
Carubv10012182m.g	1.21656	0.0314217	AT1G10610	0	basic helix-loop-helix (bHLH) DNA-binding superfamily protein
Carubv10012045m.g	-0.698206	0.701746	AT1G10620	0	Protein kinase superfamily protein
Carubv10010344m.g	-1.04248	2.5895e-05	AT1G10630	ARFA1F,ATARFA1F	ADP-ribosylation factor A1F
Carubv10008765m.g	0.82364	0.137481	AT1G10640	0	Pectin lyase-like superfamily protein
Carubv10009658m.g	-2.02461	8.60342e-12	AT1G10650	0	SBP (S-ribonuclease binding protein) family protein
Carubv10010722m.g	-4.24609	4.06985e-13	AT1G10657	0	Plant protein 1589 of unknown function
Carubv10009779m.g	-1.56833	8.10181e-12	AT1G10660	0	0
Carubv10011514m.g	-0.803909	0.000110669	AT1G10670	ACLA-1	ATP-citrate lyase A-1
Carubv10011664m.g	2.2959	0.000569169	AT1G10680	PGP10	P-glycoprotein 10
Carubv10010693m.g	0.399602	NA	AT1G10690	0	0
Carubv10009207m.g	-0.290353	0.439756	AT1G10700	PRS3	phosphoribosyl pyrophosphate (PRPP) synthase 3
Carubv10009567m.g	-1.58879	0.0271378	AT1G10710	PHS1	poor homologous synapsis 1
Carubv10009128m.g	-0.901613	5.01344e-06	AT1G10720	0	BSD domain-containing protein
Carubv10009212m.g	-0.266997	0.187215	AT1G60780	HAP13	Clathrin adaptor complexes medium subunit family protein
Carubv10009032m.g	1.38527	0.00565123	AT1G10740	0	alpha/beta-Hydrolases superfamily protein
Carubv10012645m.g	-0.415588	0.425652	AT1G10745	0	Maternally expressed gene (MEG) family protein
Carubv10011759m.g	2.10789	0.0276226	AT1G10745	0	Maternally expressed gene (MEG) family protein
Carubv10010942m.g	4.03692	7.05643e-05	AT1G10747	0	Maternally expressed gene (MEG) family protein
Carubv10009043m.g	4.34595	1.19292e-17	AT1G10750	0	Protein of Unknown Function (DUF239)
Carubv10008131m.g	0.431858	0.0579501	AT1G10760	GWD,GWD1,SEX1,SOP,SOP1	Pyruvate phosphate dikinase, PEP/pyruvate binding domain
Carubv10010490m.g	-1.73535	5.37972e-05	AT1G10770	0	Plant invertase/pectin methylesterase inhibitor superfamily protein
Carubv10009265m.g	0.0783302	0.81302	AT1G10780	0	F-box/RNI-like superfamily protein
Carubv10011389m.g	7.73043	NA	AT1G10790	0	0
Carubv10010900m.g	-0.291786	NA	AT1G10800	0	0
Carubv10010034m.g	-0.106033	0.728983	AT1G10820	0	Protein of unknown function (DUF3755)
Carubv10009509m.g	-1.84894	3.84774e-10	AT1G10830	Z-ISO,Z-ISO1.1,Z-ISO1.2	15-cis-zeta-carotene isomerase
Carubv10012627m.g	-0.0339785	0.883868	AT1G10840	TIF3H1	translation initiation factor 3 subunit H1
Carubv10011198m.g	-1.36463	3.69374e-09	AT1G10850	0	Leucine-rich repeat protein kinase family protein
Carubv10011084m.g	-2.87184	1.72338e-31	AT1G10870	AGD4	ARF-GAP domain 4
Carubv10012419m.g	-6.37062	1.0904e-08	AT1G10880	0	Core-2/I-branching beta-1,6-N-acetylglucosaminyltransferase family protein
Carubv10011265m.g	-2.49711	0.084321	AT1G10870	AGD4	ARF-GAP domain 4
Carubv10009394m.g	-0.130549	0.92498	AT3G13680	0	F-box and associated interaction domains-containing protein
Carubv10008368m.g	0.13982	0.624281	AT1G10900	0	Phosphatidylinositol-4-phosphate 5-kinase family protein
Carubv10008215m.g	0.42034	0.525217	AT5G48620	0	Disease resistance protein (CC-NBS-LRR class) family
Carubv10012033m.g	-0.236895	0.303802	AT1G10930	ATRECQ4A,ATSGS1,RECQ4A	DNA helicase (RECQl4A)
Carubv10009533m.g	-1.05324	3.63458e-07	AT1G10940	ASK1,SNRK2-4,SNRK2.4,SRK2A	Protein kinase superfamily protein
Carubv10011995m.g	-1.05166	1.7366e-09	AT1G10950	AtTMN1,TMN1	transmembrane nine 1
Carubv10010893m.g	0.0537316	NA	AT1G10960	ATFD1,FD1	ferredoxin 1
Carubv10009291m.g	0.619712	0.139688	AT1G10970	ATZIP4,ZIP4	zinc transporter 4 precursor
Carubv10008829m.g	0.886709	0.00637167	AT1G10980	0	Lung seven transmembrane receptor family protein
Carubv10010713m.g	-3.05081	0.0359658	0	0	0
Carubv10008710m.g	1.5243	0.0365892	AT1G11000	ATMLO4,MLO4	Seven transmembrane MLO family protein
Carubv10009723m.g	-0.873206	0.000197405	AT1G11020	0	RING/FYVE/PHD zinc finger superfamily protein
Carubv10011013m.g	2.13621	0.198643	AT1G11040	0	HSP40/DnaJ peptide-binding protein
Carubv10008580m.g	1.95895	1.59675e-08	AT1G11050	0	Protein kinase superfamily protein
Carubv10008277m.g	-0.0566099	0.849309	AT1G11060	0	WAPL (Wings apart-like protein regulation of heterochromatin) protein
Carubv10008313m.g	-0.170849	0.601506	AT1G11070	0	0
Carubv10008980m.g	1.85862	0.113508	AT1G11080	scpl31	serine carboxypeptidase-like 31
Carubv10011807m.g	0.122604	0.670188	AT1G11090	0	alpha/beta-Hydrolases superfamily protein
Carubv10009663m.g	0.871726	0.0117699	AT1G61150	0	LisH and RanBPM domains containing protein
Carubv10011297m.g	1.57892	0.0575284	AT1G11112	0	0
Carubv10010513m.g	1.19731	0.0890303	AT1G11120	0	0
Carubv10010002m.g	3.15232	8.93823e-06	AT1G11125	0	0
Carubv10008374m.g	1.65685	6.756e-07	AT1G11130	SCM,SRF9,SUB	Leucine-rich repeat protein kinase family protein
Carubv10011222m.g	-0.406191	NA	AT5G01140	0	Protein of unknown function (DUF674)
Carubv10008176m.g	-0.616022	0.228886	AT1G11160	0	Transducin/WD40 repeat-like superfamily protein
Carubv10009178m.g	-4.74078	2.19586e-43	AT1G11170	0	Protein of unknown function (DUF707)
Carubv10009907m.g	-0.607105	0.0395491	AT1G11180	0	Secretory carrier membrane protein (SCAMP) family protein
Carubv10009855m.g	-4.37802	5.95148e-10	AT1G11190	BFN1,ENDO1	bifunctional nuclease i
Carubv10009893m.g	-0.386841	0.188779	AT1G11200	0	Protein of unknown function (DUF300)
Carubv10009737m.g	3.51188	0.00101384	AT1G11210	0	Protein of unknown function (DUF761)
Carubv10009857m.g	-2.46679	0.000262185	AT1G11220	0	Protein of unknown function (DUF761)
Carubv10010339m.g	0.627182	0.0102279	AT1G11240	0	0
Carubv10011255m.g	-0.179548	0.919107	AT1G61290	ATSYP124,SYP124	syntaxin of plants 124
Carubv10012241m.g	0.92403	NA	AT1G61340	0	F-box family protein
Carubv10011551m.g	1.0314	NA	AT1G12180	0	0
Carubv10011868m.g	4.91792	0.00092033	AT1G12170	0	F-box family protein
Carubv10008705m.g	-2.89322	1.71341e-19	AT1G61350	0	ARM repeat superfamily protein
Carubv10011684m.g	0.0537316	NA	AT2G41590	0	0
Carubv10008855m.g	2.64212	1.56506e-09	AT1G11260	ATSTP1,STP1	sugar transporter 1
Carubv10010954m.g	0.0491871	NA	AT1G11280	0	S-locus lectin protein kinase family protein
Carubv10011264m.g	0.357667	0.329703	AT1G11290	CRR22	Pentatricopeptide repeat (PPR) superfamily protein
Carubv10012649m.g	1.11035	0.272569	AT1G11300	0	protein serine/threonine kinases;protein kinases;ATP binding;sugar binding;kinases;carbohydrate binding
Carubv10008691m.g	0.789527	0.0399732	AT1G11310	ATMLO2,MLO2,PMR2	Seven transmembrane MLO family protein
Carubv10009086m.g	-4.99599	1.17552e-11	AT1G11310	ATMLO2,MLO2,PMR2	Seven transmembrane MLO family protein
Carubv10009253m.g	-1.70701	8.28608e-07	AT1G11320	0	0
Carubv10011980m.g	2.03396	9.61311e-45	AT1G11330	0	S-locus lectin protein kinase family protein
Carubv10008342m.g	1.27499	0.362625	AT1G11340	0	S-locus lectin protein kinase family protein
Carubv10011967m.g	2.7796	3.38949e-08	AT1G11362	0	Plant invertase/pectin methylesterase inhibitor superfamily protein
Carubv10009983m.g	-0.775664	0.00137251	AT1G11360	0	Adenine nucleotide alpha hydrolases-like superfamily protein
Carubv10009760m.g	-3.72149	1.42194e-07	AT1G11580	ATPMEPCRA,PMEPCRA	methylesterase PCR A
Carubv10009956m.g	-2.13007	4.99461e-13	AT1G11380	0	PLAC8 family protein
Carubv10008587m.g	-1.81327	NA	AT1G11390	0	Protein kinase superfamily protein
Carubv10010225m.g	1.30452	1.82266e-07	AT1G11400	PYM	partner of Y14-MAGO
Carubv10008301m.g	1.06817	0.000939473	AT1G11410	0	S-locus lectin protein kinase family protein
Carubv10010192m.g	1.07099	0.00189011	AT1G11430	0	plastid developmental protein DAG, putative
Carubv10009508m.g	-1.0239	0.0129203	AT1G11440	0	0
Carubv10012636m.g	3.45057	3.31987e-17	AT1G11460	0	nodulin MtN21 /EamA-like transporter family protein
Carubv10010812m.g	0.102996	0.700658	AT1G11475	NRPB10,NRPD10,NRPE10	RNA polymerases N / 8 kDa subunit
Carubv10008685m.g	-0.959542	6.68441e-06	AT1G11480	0	eukaryotic translation initiation factor-related
Carubv10012610m.g	-2.78339	0.0681073	AT1G11490	0	zinc finger (C2H2 type) family protein
Carubv10010526m.g	0.410378	NA	AT1G11500	0	Protein of unknown function (DUF1218)
Carubv10011873m.g	1.23609	0.00386082	AT1G11510	0	DNA-binding storekeeper protein-related transcriptional regulator
Carubv10010679m.g	1.548	0.225275	AT1G11530	ATCXXS1,CXXS1	C-terminal cysteine residue is changed to a serine 1
Carubv10011874m.g	2.87797	2.96005e-06	AT1G11540	0	Sulfite exporter TauE/SafE family protein
Carubv10009849m.g	1.54838	0.0411162	AT1G11545	XTH8	xyloglucan endotransglucosylase/hydrolase 8
Carubv10011840m.g	2.06576	0.161979	AT1G11560	0	Oligosaccharyltransferase complex/magnesium transporter family protein
Carubv10010585m.g	2.06075	0.158262	AT1G11570	NTL	NTF2-like
Carubv10012507m.g	0.0537316	NA	AT1G11572	0	Plant thionin family protein
Carubv10008769m.g	1.62854	1.0543e-05	AT1G11580	ATPMEPCRA,PMEPCRA	methylesterase PCR A
Carubv10012639m.g	0.0537316	NA	AT1G02190	0	Fatty acid hydroxylase superfamily
Carubv10009064m.g	1.02926	0.385169	AT5G28237	0	Pyridoxal-5\'-phosphate-dependent enzyme family protein
Carubv10010998m.g	-1.69763	NA	AT3G51700	0	PIF1 helicase
Carubv10009203m.g	-2.2728	1.32362e-12	AT1G61800	ATGPT2,GPT2	glucose-6-phosphate/phosphate translocator 2
Carubv10012176m.g	0.0537316	NA	AT4G11900	0	S-locus lectin protein kinase family protein
Carubv10008888m.g	0.0537316	NA	AT1G11600	CYP77B1	cytochrome P450, family 77, subfamily B, polypeptide 1
Carubv10011743m.g	0.824745	0.651297	AT1G11620	0	F-box and associated interaction domains-containing protein
Carubv10011712m.g	-1.5736	0.331612	AT1G11620	0	F-box and associated interaction domains-containing protein
Carubv10009327m.g	-0.445485	0.177079	AT1G11630	0	Tetratricopeptide repeat (TPR)-like superfamily protein
Carubv10009124m.g	-0.350635	0.137539	AT1G11650	ATRBP45B,RBP45B	RNA-binding (RRM/RBD/RNP motifs) family protein
Carubv10011897m.g	1.32724	NA	AT1G11655	0	0
Carubv10008380m.g	-1.18478	8.33421e-10	AT1G11660	0	heat shock protein 70 (Hsp 70) family protein
Carubv10008916m.g	-0.226695	0.60007	AT1G11670	0	MATE efflux family protein
Carubv10008973m.g	-0.540869	0.0324484	AT1G11680	CYP51,CYP51A2,CYP51G1,EMB1738	CYTOCHROME P450 51G1
Carubv10010144m.g	-2.82947	7.51179e-05	AT1G11690	0	0
Carubv10010311m.g	-0.0614256	0.892337	AT1G11700	0	Protein of unknown function, DUF584
Carubv10012420m.g	1.12574	0.0386897	AT1G11710	0	Pentatricopeptide repeat (PPR) superfamily protein
Carubv10011175m.g	0.217872	0.402891	AT1G11720	ATSS3,SS3	starch synthase 3
Carubv10009427m.g	0.434638	0.715211	AT1G11730	0	Galactosyltransferase family protein
Carubv10011779m.g	-3.06536	1.86624e-05	AT1G11740	0	ankyrin repeat family protein
Carubv10010008m.g	0.488143	0.0290375	AT1G11750	CLPP6,NCLPP1,NCLPP6	CLP protease proteolytic subunit 6
Carubv10012283m.g	-0.689119	0.0209888	AT1G11755	LEW1	Undecaprenyl pyrophosphate synthetase family protein
Carubv10010459m.g	0.311434	0.381739	AT1G11760	MED32	0
Carubv10011450m.g	-0.317172	0.87276	AT1G11765	0	Plant self-incompatibility protein S1 family
Carubv10011431m.g	0.237742	0.765568	AT1G11770	0	FAD-binding Berberine family protein
Carubv10009622m.g	0.591809	0.0748684	AT1G11780	0	oxidoreductase, 2OG-Fe(II) oxygenase family protein
Carubv10009627m.g	1.26465	0.000149697	AT1G11790	ADT1	arogenate dehydratase 1
Carubv10012467m.g	0.476583	0.0551241	AT1G11820	0	O-Glycosyl hydrolases family 17 protein
Carubv10009942m.g	-0.684908	0.000810405	AT1G11840	ATGLX1,GLX1	glyoxalase I homolog
Carubv10009236m.g	-0.358751	0.150284	AT1G11860	0	Glycine cleavage T-protein family
Carubv10012421m.g	-0.283528	0.175541	AT1G11870	ATSRS,OVA7,SRS	Seryl-tRNA synthetase
Carubv10008966m.g	-0.564943	0.0217704	AT1G11880	0	transferases, transferring hexosyl groups
Carubv10010262m.g	0.147524	0.556369	AT1G11890	ATSEC22,SEC22	Synaptobrevin family protein
Carubv10012108m.g	0.0537316	NA	AT1G11900	0	Tetratricopeptide repeat (TPR)-like superfamily protein
Carubv10012392m.g	0.0537316	NA	AT1G11905	0	B-cell receptor-associated protein 31-like
Carubv10008798m.g	0.359234	0.160343	AT1G11910	APA1,ATAPA1	aspartic proteinase A1
Carubv10009711m.g	0.849645	NA	AT1G11915	0	0
Carubv10011187m.g	0.45924	NA	AT1G11920	0	Pectin lyase-like superfamily protein
Carubv10010604m.g	0.45924	NA	AT1G11925	0	Stigma-specific Stig1 family protein
Carubv10010142m.g	-0.600223	0.0240088	AT1G11930	0	Predicted pyridoxal phosphate-dependent enzyme, YBL036C type
Carubv10009428m.g	0.126885	0.660183	AT1G11940	0	Core-2/I-branching beta-1,6-N-acetylglucosaminyltransferase family protein
Carubv10011915m.g	1.22573	0.00274486	AT1G11950	0	Transcription factor jumonji (jmjC) domain-containing protein
Carubv10008363m.g	0.918944	0.000605002	AT1G11960	0	ERD (early-responsive to dehydration stress) family protein
Carubv10011821m.g	-8.0673	1.53699e-90	AT1G11990	0	O-fucosyltransferase family protein
Carubv10008719m.g	0.327661	0.0994915	AT1G12000	0	Phosphofructokinase family protein
Carubv10011493m.g	-0.691962	0.0270027	AT1G12010	0	2-oxoglutarate (2OG) and Fe(II)-dependent oxygenase superfamily protein
Carubv10010193m.g	0.574228	0.345295	AT1G12020	0	0
Carubv10009904m.g	2.08174	0.0641874	AT1G12030	0	Protein of unknown function (DUF506)
Carubv10011166m.g	1.02065	NA	AT1G12040	LRX1	leucine-rich repeat/extensin 1
Carubv10009247m.g	0.663182	0.00284132	AT1G12050	0	fumarylacetoacetase, putative
Carubv10012322m.g	-1.35964	0.00150331	AT1G12060	ATBAG5,BAG5	BCL-2-associated athanogene 5
Carubv10010850m.g	0.0142773	0.990603	AT1G12064	0	0
Carubv10012423m.g	-0.551824	0.74804	AT1G12070	0	Immunoglobulin E-set superfamily protein
Carubv10011959m.g	-0.778051	0.0104955	AT1G12090	ELP	extensin-like protein
Carubv10012658m.g	-0.68556	NA	AT1G12100	0	Bifunctional inhibitor/lipid-transfer protein/seed storage 2S albumin superfamily protein
Carubv10008661m.g	2.92546	0.000942779	AT1G12110	ATNRT1,B-1,CHL1,CHL1-1,NRT1,NRT1.1	nitrate transporter 1.1
Carubv10008871m.g	-1.22498	1.19991e-10	AT1G12120	0	Plant protein of unknown function (DUF863)
Carubv10012015m.g	0.0537316	NA	AT1G12130	0	Flavin-binding monooxygenase family protein
Carubv10011483m.g	0.504984	0.0790452	AT1G12140	FMO GS-OX5	flavin-monooxygenase glucosinolate S-oxygenase 5
Carubv10009080m.g	1.48182	0.0727185	AT1G12140	FMO GS-OX5	flavin-monooxygenase glucosinolate S-oxygenase 5
Carubv10010971m.g	-1.3613	0.355253	AT1G12150	0	Plant protein of unknown function (DUF827)
Carubv10009045m.g	0.200065	0.651194	AT1G12160	0	Flavin-binding monooxygenase family protein
Carubv10011836m.g	6.80068	5.13631e-18	AT1G12170	0	F-box family protein
Carubv10011951m.g	5.98589	NA	AT1G12190	0	F-box and associated interaction domains-containing protein
Carubv10009065m.g	3.66629	9.59393e-37	AT1G12200	0	Flavin-binding monooxygenase family protein
Carubv10008555m.g	-1.19879	0.031844	AT1G12300	0	Tetratricopeptide repeat (TPR)-like superfamily protein
Carubv10009318m.g	0.668892	0.00129412	AT1G12230	0	Aldolase superfamily protein
Carubv10008995m.g	-1.70579	2.6533e-14	AT1G12240	ATBETAFRUCT4,VAC-INV	Glycosyl hydrolases family 32 protein
Carubv10012184m.g	0.797905	0.0963045	AT1G12244	0	Polynucleotidyl transferase, ribonuclease H-like superfamily protein
Carubv10012683m.g	0.0444489	0.959894	AT1G12250	0	Pentapeptide repeat-containing protein
Carubv10009366m.g	-1.28483	0.411489	AT1G12260	ANAC007,EMB2749,NAC007,VND4	NAC 007
Carubv10011737m.g	5.05323	9.71105e-38	AT1G12270	0	stress-inducible protein, putative
Carubv10012293m.g	-0.300523	0.453636	AT1G12280	0	LRR and NB-ARC domains-containing disease resistance protein
Carubv10008383m.g	0.652355	0.699013	AT1G12290	0	Disease resistance protein (CC-NBS-LRR class) family
Carubv10011992m.g	-0.184449	0.554334	AT1G12310	0	Calcium-binding EF-hand family protein
Carubv10010287m.g	-1.10191	0.158493	AT1G12320	0	Protein of unknown function (DUF1442)
Carubv10008918m.g	0.938544	0.000154171	AT1G12330	0	0
Carubv10012548m.g	0.723346	0.00434013	AT1G12350	ATCOAB,COAB	4-phospho-panto-thenoylcysteine synthetase
Carubv10011323m.g	-0.732452	5.37972e-05	AT1G12360	KEU	Sec1/munc18-like (SM) proteins superfamily
Carubv10011602m.g	-0.100178	0.814664	AT1G12370	PHR1,UVR2	photolyase 1
Carubv10011100m.g	-1.08132	0.00512256	AT1G12380	0	0
Carubv10012074m.g	-0.71817	0.00512289	AT1G12390	0	Cornichon family protein
Carubv10009963m.g	0.258467	0.296575	AT1G12410	CLP2,CLPR2,NCLPP2	CLP protease proteolytic subunit 2
Carubv10009162m.g	0.159968	0.862895	AT1G12420	ACR8	ACT domain repeat 8
Carubv10012549m.g	0.181223	0.928176	AT3G27999	0	Plant invertase/pectin methylesterase inhibitor superfamily protein
Carubv10012144m.g	1.40868	NA	AT1G11593	0	Plant invertase/pectin methylesterase inhibitor superfamily protein
Carubv10008964m.g	0.657338	0.162478	AT1G11590	0	Plant invertase/pectin methylesterase inhibitor superfamily
Carubv10008202m.g	-0.171836	0.56019	AT1G12430	ARK3,PAK	armadillo repeat kinesin 3
Carubv10010492m.g	0.827305	0.000428767	AT1G12440	0	A20/AN1-like zinc finger family protein
Carubv10009868m.g	-0.97474	4.40043e-05	AT1G12450	0	SNARE associated Golgi protein family
Carubv10008271m.g	0.0537316	NA	AT1G12460	0	Leucine-rich repeat protein kinase family protein
Carubv10008889m.g	0.0537316	NA	AT1G62960	ACS10	ACC synthase 10
Carubv10008200m.g	-0.735825	1.29364e-05	AT1G12470	0	zinc ion binding
Carubv10011981m.g	0.0537316	NA	AT1G12480	CDI3,OZS1,RCD3,SLAC1	C4-dicarboxylate transporter/malic acid transport protein
Carubv10009549m.g	-0.187489	0.597928	AT1G12500	0	Nucleotide-sugar transporter family protein
Carubv10011816m.g	-1.82151	1.34202e-20	AT1G12520	ATCCS,CCS	copper chaperone for SOD1
Carubv10012364m.g	0.144305	0.643644	AT1G12530	0	0
Carubv10011792m.g	0.0537316	NA	AT1G12540	0	basic helix-loop-helix (bHLH) DNA-binding superfamily protein
Carubv10009669m.g	0.428352	0.126463	AT1G12550	0	D-isomer specific 2-hydroxyacid dehydrogenase family protein
Carubv10011828m.g	0.0537316	NA	AT1G12560	ATEXP7,ATEXPA7,ATHEXP ALPHA 1.26,EXP7,EXPA7	expansin A7
Carubv10008714m.g	-6.98658	1.56305e-11	AT1G12570	0	Glucose-methanol-choline (GMC) oxidoreductase family protein
Carubv10008851m.g	-1.1994	3.27462e-06	AT1G12580	PEPKR1	phosphoenolpyruvate carboxylase-related kinase 1
Carubv10009601m.g	-0.752946	0.110379	AT1G12600	0	UDP-N-acetylglucosamine (UAA) transporter family
Carubv10010303m.g	-1.35451	NA	AT1G12610	DDF1	Integrase-type DNA-binding superfamily protein
Carubv10011758m.g	-0.982677	0.00185316	AT1G12300	0	Tetratricopeptide repeat (TPR)-like superfamily protein
Carubv10012127m.g	-3.41276	1.63797e-06	AT1G12300	0	Tetratricopeptide repeat (TPR)-like superfamily protein
Carubv10011428m.g	-0.199226	0.6097	AT1G12300	0	Tetratricopeptide repeat (TPR)-like superfamily protein
Carubv10012147m.g	-0.683423	NA	AT1G12630	0	Integrase-type DNA-binding superfamily protein
Carubv10009061m.g	-0.734775	0.000281277	AT1G12640	0	MBOAT (membrane bound O-acyl transferase) family protein
Carubv10010126m.g	0.128709	0.6502	AT1G12650	0	0
Carubv10010857m.g	0.0134741	0.99256	AT1G12660	0	0
Carubv10011831m.g	1.75154	0.270174	AT1G12663	0	0
Carubv10011145m.g	9.24048	NA	AT1G12665	0	0
Carubv10012242m.g	7.21152	8.47568e-05	AT1G12660	0	0
Carubv10012592m.g	5.09816	6.90973e-05	AT1G12672	0	0
Carubv10010628m.g	6.23302	3.85171e-07	AT1G12672	0	0
Carubv10009041m.g	-0.720365	0.000888065	AT1G12680	PEPKR2	phosphoenolpyruvate carboxylase-related kinase 2
Carubv10011393m.g	-2.06106	0.112388	AT1G12700	0	ATP binding;nucleic acid binding;helicases
Carubv10012052m.g	0.559481	0.358809	AT1G12700	0	ATP binding;nucleic acid binding;helicases
Carubv10009895m.g	0.0148972	0.975846	AT1G12710	AtPP2-A12,PP2-A12	phloem protein 2-A12
Carubv10009259m.g	0.531708	0.143698	AT1G12730	0	GPI transamidase subunit PIG-U
Carubv10010788m.g	-1.42656	0.0742912	0	0	0
Carubv10011917m.g	1.87129	4.12173e-05	AT1G12750	ATRBL6,RBL6	RHOMBOID-like protein 6
Carubv10011891m.g	2.07412	8.23693e-06	AT1G12300	0	Tetratricopeptide repeat (TPR)-like superfamily protein
Carubv10009353m.g	-1.73608	5.58413e-11	AT1G12760	0	Zinc finger, C3HC4 type (RING finger) family protein
Carubv10008776m.g	0.422809	0.107532	AT1G12770	EMB1586,ISE1	P-loop containing nucleoside triphosphate hydrolases superfamily protein
Carubv10012310m.g	0.0537316	NA	AT1G12300	0	Tetratricopeptide repeat (TPR)-like superfamily protein
Carubv10009592m.g	-1.03028	1.64113e-05	AT1G12780	ATUGE1,UGE1	UDP-D-glucose/UDP-D-galactose 4-epimerase 1
Carubv10012622m.g	0.697103	0.102154	AT1G12790	0	0
Carubv10008376m.g	0.365225	0.223186	AT1G12800	0	Nucleic acid-binding, OB-fold-like protein
Carubv10010879m.g	0.291372	NA	AT1G12805	0	nucleotide binding
Carubv10011061m.g	0.406987	0.170028	AT1G12810	0	proline-rich family protein
Carubv10012250m.g	-0.410415	0.0551339	AT1G12820	AFB3	auxin signaling F-box 3
Carubv10009467m.g	-0.767295	6.21166e-05	AT1G12840	ATVHA-C,DET3	vacuolar ATP synthase subunit C (VATC) / V-ATPase C subunit / vacuolar proton pump C subunit (DET3)
Carubv10012535m.g	0.205674	0.908318	AT1G12845	0	0
Carubv10009343m.g	-1.22033	1.80205e-05	AT1G12850	0	Phosphoglycerate mutase family protein
Carubv10012093m.g	-0.36795	NA	AT1G12855	0	F-box family protein
Carubv10009081m.g	-0.672989	0.187754	AT1G12860	ICE2,SCRM2	basic helix-loop-helix (bHLH) DNA-binding superfamily protein
Carubv10011604m.g	0.0177533	0.97661	AT1G12855	0	F-box family protein
Carubv10011720m.g	-1.19166	0.117237	AT1G12870	0	F-box and associated interaction domains-containing protein
Carubv10010219m.g	0.700988	0.261564	AT1G12880	atnudt12,NUDT12	nudix hydrolase homolog 12
Carubv10012659m.g	1.57692	0.0180226	AT1G12890	0	Integrase-type DNA-binding superfamily protein
Carubv10009349m.g	0.697639	0.0788505	AT1G12900	GAPA-2	glyceraldehyde 3-phosphate dehydrogenase A subunit 2
Carubv10011643m.g	0.557367	0.0122582	AT1G12910	ATAN11,LWD1	Transducin/WD40 repeat-like superfamily protein
Carubv10009183m.g	0.0218391	0.935233	AT1G12920	ERF1-2	eukaryotic release factor 1-2
Carubv10011575m.g	-0.056917	0.85817	AT1G12930	0	ARM repeat superfamily protein
Carubv10008932m.g	-0.556315	0.705135	AT1G12940	ATNRT2.5,NRT2.5	nitrate transporter2.5
Carubv10011529m.g	0.437409	0.777802	AT1G12950	RSH2	root hair specific 2
Carubv10009069m.g	0.811183	0.0180442	AT1G12970	PIRL3	plant intracellular ras group-related LRR 3
Carubv10011023m.g	0.91997	NA	AT1G12980	DRN,ESR1	Integrase-type DNA-binding superfamily protein
Carubv10009381m.g	-1.31433	1.25478e-06	AT1G12990	0	beta-1,4-N-acetylglucosaminyltransferase family protein
Carubv10011103m.g	0.191361	0.648227	AT1G13000	0	Protein of unknown function (DUF707)
Carubv10008811m.g	-0.184473	0.428462	AT1G13020	EIF4B2	eukaryotic initiation factor 4B2
Carubv10008617m.g	0.834113	0.000453882	AT1G13030	0	sphere organelles protein-related
Carubv10012598m.g	0.415076	0.246321	AT1G13040	0	Pentatricopeptide repeat (PPR-like) superfamily protein
Carubv10011087m.g	0.603505	0.0828034	AT1G13050	0	0
Carubv10009991m.g	0.122367	0.567825	AT1G13060	PBE1	20S proteasome beta subunit E1
Carubv10008923m.g	2.64924	3.92857e-06	AT1G13080	CYP71B2	cytochrome P450, family 71, subfamily B, polypeptide 2
Carubv10008934m.g	2.14676	0.107107	AT1G13080	CYP71B2	cytochrome P450, family 71, subfamily B, polypeptide 2
Carubv10010669m.g	0.926476	NA	0	0	0
Carubv10011437m.g	10.3668	3.49323e-08	AT3G61177	LCR53	low-molecular-weight cysteine-rich 53
Carubv10008625m.g	0.309433	0.164892	AT1G13120	emb1745	embryo defective 1745
Carubv10008758m.g	2.56208	6.02711e-19	AT1G13130	0	Cellulase (glycosyl hydrolase family 5) protein
Carubv10010685m.g	-1.43155	0.0117802	0	0	0
Carubv10008325m.g	0.54971	0.0275595	AT1G13160	0	ARM repeat superfamily protein
Carubv10008320m.g	-0.469102	0.0438629	AT1G13170	ORP1D	OSBP(oxysterol binding protein)-related protein 1D
Carubv10009216m.g	-0.600396	0.00136583	AT1G13180	ARP3,ATARP3,DIS1	Actin-like ATPase superfamily protein
Carubv10008697m.g	-0.19582	NA	AT1G13190	0	RNA-binding (RRM/RBD/RNP motifs) family protein
Carubv10010035m.g	-0.633879	0.163167	AT1G13195	0	RING/U-box superfamily protein
Carubv10008116m.g	0.745635	0.527135	AT1G13210	ACA.l	autoinhibited Ca2+/ATPase II
Carubv10011605m.g	0.561595	0.017008	AT1G13220	LINC2	nuclear matrix constituent protein-related
Carubv10009239m.g	-0.82345	0.191704	AT1G13230	0	Leucine-rich repeat (LRR) family protein
Carubv10012257m.g	0.671141	0.650804	AT1G13245	DVL4,RTFL17	ROTUNDIFOLIA like 17
Carubv10010952m.g	0.131445	0.901613	AT1G13250	GATL3	galacturonosyltransferase-like 3
Carubv10009612m.g	3.21563	0.0250691	AT1G13260	EDF4,RAV1	related to ABI3/VP1 1
Carubv10009496m.g	0.410017	0.0762175	AT1G13270	MAP1B,MAP1C	methionine aminopeptidase 1B
Carubv10010123m.g	1.63492	1.65701e-26	AT1G13280	AOC4	allene oxide cyclase 4
Carubv10012013m.g	0.458701	NA	AT1G13290	DOT5,WIP6	C2H2-like zinc finger protein
Carubv10011925m.g	0.45924	NA	AT1G13300	HRS1	myb-like transcription factor family protein
Carubv10012068m.g	1.15468	0.349048	AT1G13310	0	Endosomal targeting BRO1-like domain-containing protein
Carubv10008615m.g	-0.0456626	0.844698	AT1G13320	PP2AA3	protein phosphatase 2A subunit A3
Carubv10011847m.g	-0.620392	0.0685553	AT1G13330	AHP2	Arabidopsis Hop2 homolog
Carubv10009293m.g	-3.29271	2.71552e-23	AT1G13340	0	Regulator of Vps4 activity in the MVB pathway protein
Carubv10010335m.g	-2.90999	8.74988e-45	AT1G13360	0	0
Carubv10010302m.g	1.17908	3.52678e-05	AT1G13380	0	Protein of unknown function (DUF1218)
Carubv10010468m.g	1.01547	0.0120725	AT1G13390	0	0
Carubv10010898m.g	1.85693	0.185239	AT1G13400	JGL,NUB	C2H2 and C2HC zinc fingers superfamily protein
Carubv10008584m.g	0.953725	0.0414716	AT1G13410	0	Tetratricopeptide repeat (TPR)-like superfamily protein
Carubv10012325m.g	-3.17208	0.0277982	AT1G13430	ATST4C,ST4C	sulfotransferase 4C
Carubv10009662m.g	0.869546	8.48573e-05	AT1G13440	GAPC-2,GAPC2	glyceraldehyde-3-phosphate dehydrogenase C2
Carubv10009313m.g	0.288767	0.403607	AT1G13450	0	Homeodomain-like superfamily protein
Carubv10008945m.g	-1.01258	1.0663e-05	AT1G13460	0	Protein phosphatase 2A regulatory B subunit family protein
Carubv10012255m.g	6.26107	NA	AT1G12855	0	F-box family protein
Carubv10009445m.g	0.0312597	NA	AT1G13470	0	Protein of unknown function (DUF1262)
Carubv10012231m.g	0.0537316	NA	AT1G13480	0	Protein of unknown function (DUF1262)
Carubv10011246m.g	-0.374373	NA	AT1G13520	0	Protein of unknown function (DUF1262)
Carubv10011549m.g	1.89817	0.000136157	AT1G13530	0	Protein of unknown function (DUF1262)
Carubv10012504m.g	-0.243285	0.628758	AT1G13540	0	Protein of unknown function (DUF1262)
Carubv10011634m.g	-0.957949	NA	AT1G13550	0	Protein of unknown function (DUF1262)
Carubv10011704m.g	-0.0129972	0.961445	AT1G13560	AAPT1,ATAAPT1	aminoalcoholphosphotransferase 1
Carubv10009278m.g	-1.41498	1.57385e-07	AT1G13570	0	F-box/RNI-like superfamily protein
Carubv10010947m.g	-1.18134	7.96055e-06	AT1G13580	LAG13	LAG1 longevity assurance homolog 3
Carubv10011693m.g	-0.521966	0.55579	AT1G13590	ATPSK1,PSK1	phytosulfokine 1 precursor
Carubv10011839m.g	-0.352177	NA	AT1G13600	AtbZIP58,bZIP58	basic leucine-zipper 58
Carubv10011982m.g	4.47803	2.1048e-07	AT1G13605	0	0
Carubv10011972m.g	-0.585168	0.251025	AT1G13609	0	Defensin-like (DEFL) family protein
Carubv10011177m.g	0.0537316	NA	AT2G04032	ZIP7	zinc transporter 7 precursor
Carubv10011195m.g	2.55535	0.0545623	AT1G13610	0	alpha/beta-Hydrolases superfamily protein
Carubv10010856m.g	1.40936	0.461066	AT1G13620	RGF2	0
Carubv10008310m.g	-0.937657	0.00700431	AT1G13630	0	Tetratricopeptide repeat (TPR)-like superfamily protein
Carubv10009802m.g	-9.55563	5.57693e-21	AT1G13635	0	DNA glycosylase superfamily protein
Carubv10008594m.g	-0.827531	0.000825641	AT1G13640	0	Phosphatidylinositol 3- and 4-kinase family protein
Carubv10009590m.g	-0.347642	NA	AT2G03810	0	18S pre-ribosomal assembly protein gar2-related
Carubv10012096m.g	0.0456129	NA	AT5G43690	0	P-loop containing nucleoside triphosphate hydrolases superfamily protein
Carubv10010185m.g	0.0510713	NA	AT1G13670	0	0
Carubv10011738m.g	2.67241	9.18667e-11	AT1G13680	0	PLC-like phosphodiesterases superfamily protein
Carubv10009460m.g	-3.76438	3.82724e-11	AT1G11270	0	F-box and associated interaction domains-containing protein
Carubv10010435m.g	1.57064	1.37199e-06	AT1G13690	ATE1	ATPase E1
Carubv10010036m.g	-0.366024	NA	AT1G13700	PGL1	6-phosphogluconolactonase 1
Carubv10008872m.g	2.51754	0.00476179	AT1G13710	CYP78A5,KLU	cytochrome P450, family 78, subfamily A, polypeptide 5
Carubv10011148m.g	0.873067	0.000544827	AT1G13730	0	Nuclear transport factor 2 (NTF2) family protein with RNA binding (RRM-RBD-RNP motifs) domain
Carubv10009552m.g	-1.41954	0.000128064	AT1G13740	AFP2	ABI five binding protein 2
Carubv10009181m.g	-0.242748	0.443564	AT1G13770	RUS3	Protein of unknown function, DUF647
Carubv10008414m.g	-0.409292	0.179035	AT1G13790	0	XH/XS domain-containing protein
Carubv10008293m.g	0.768198	0.0476976	AT1G13800	0	Tetratricopeptide repeat (TPR)-like superfamily protein
Carubv10009613m.g	1.12558	0.00133245	AT1G13810	0	Restriction endonuclease, type II-like superfamily protein
Carubv10009998m.g	-0.368458	0.398407	AT1G13820	0	alpha/beta-Hydrolases superfamily protein
Carubv10012551m.g	0.0537316	NA	AT1G13830	0	Carbohydrate-binding X8 domain superfamily protein
Carubv10008622m.g	-4.42708	1.46506e-18	AT1G13860	QUL1	QUASIMODO2 LIKE 1
Carubv10009863m.g	-0.0700518	0.823111	AT1G13870	DRL1	calmodulin binding;purine nucleotide binding
Carubv10009267m.g	-0.806168	0.00395029	AT1G13880	0	ELM2 domain-containing protein
Carubv10012302m.g	-0.26454	0.886231	AT1G13890	ATSNAP30,SNAP30	soluble N-ethylmaleimide-sensitive factor adaptor protein 30
Carubv10008535m.g	-1.98022	5.59613e-23	AT1G13900	0	Purple acid phosphatases superfamily protein
Carubv10009699m.g	1.77493	1.8135e-10	AT1G13910	0	Leucine-rich repeat (LRR) family protein
Carubv10010071m.g	-0.255684	NA	AT1G13920	0	Remorin family protein
Carubv10010793m.g	0.0537316	NA	0	0	0
Carubv10010521m.g	-0.778033	0.41978	AT1G13930	0	0
Carubv10008191m.g	-0.681854	0.00261465	AT1G13940	0	Plant protein of unknown function (DUF863)
Carubv10008859m.g	-0.726984	0.00726178	AT1G13960	WRKY4	WRKY DNA-binding protein 4
Carubv10008911m.g	-0.778861	0.282038	AT1G13970	0	Protein of unknown function (DUF1336)
Carubv10011818m.g	-0.859628	2.40644e-05	AT1G13980	EMB30,GN,VAN7	sec7 domain-containing protein
Carubv10011044m.g	-0.484552	0.142111	AT1G13990	0	0
Carubv10009171m.g	-0.653886	0.00781314	AT1G14000	VIK	VH1-interacting kinase
Carubv10010285m.g	0.0537316	NA	AT1G14010	0	emp24/gp25L/p24 family/GOLD family protein
Carubv10008919m.g	-1.31814	8.78608e-06	AT1G14020	0	O-fucosyltransferase family protein
Carubv10011125m.g	0.366806	0.658212	AT1G14030	0	Rubisco methyltransferase family protein
Carubv10011174m.g	-0.84357	0.053517	AT1G14040	0	EXS (ERD1/XPR1/SYG1) family protein
Carubv10010289m.g	0.0305414	0.987724	AT1G14048	0	GCK domain-containing protein
Carubv10011860m.g	1.73181	1.40567e-08	AT1G14060	0	GCK domain-containing protein
Carubv10008772m.g	0.847732	NA	AT1G14070	FUT7	fucosyltransferase 7
Carubv10011805m.g	8.89124	NA	AT1G14080	ATFUT6,FUT6	fucosyltransferase 6
Carubv10008907m.g	6.62604	NA	AT1G14100	FUT8	fucosyltransferase 8
Carubv10012502m.g	0.914977	NA	AT1G14120	0	2-oxoglutarate (2OG) and Fe(II)-dependent oxygenase superfamily protein
Carubv10009839m.g	0.469978	0.116889	AT1G14130	0	2-oxoglutarate (2OG) and Fe(II)-dependent oxygenase superfamily protein
Carubv10009878m.g	-0.732294	0.00920333	AT1G14140	0	Mitochondrial substrate carrier family protein
Carubv10010358m.g	-0.168098	0.915629	AT1G14150	PQL1,PQL2	PsbQ-like 2
Carubv10012228m.g	0.40981	NA	AT1G14160	0	Uncharacterised protein family (UPF0497)
Carubv10009036m.g	-2.032	3.37382e-15	AT1G14170	0	RNA-binding KH domain-containing protein
Carubv10009576m.g	-1.40501	2.4899e-06	AT1G14180	0	RING/U-box superfamily protein
Carubv10012338m.g	0.409967	NA	AT4G10457	SCRL1	SCR-like 1
Carubv10008703m.g	0.686475	0.661849	AT1G14190	0	Glucose-methanol-choline (GMC) oxidoreductase family protein
Carubv10012348m.g	0.0537316	NA	AT1G14200	0	RING/U-box superfamily protein
Carubv10010475m.g	0.0537316	NA	AT1G14205	0	Ribosomal L18p/L5e family protein
Carubv10010110m.g	0.0527751	NA	AT1G14210	0	Ribonuclease T2 family protein
Carubv10011861m.g	0.692345	NA	AT1G14220	0	Ribonuclease T2 family protein
Carubv10008956m.g	1.18776	9.32203e-06	AT1G14230	0	GDA1/CD39 nucleoside phosphatase family protein
Carubv10008986m.g	-0.443523	0.82144	AT1G14240	0	GDA1/CD39 nucleoside phosphatase family protein
Carubv10012202m.g	-0.717899	0.413845	AT1G14260	0	RING/FYVE/PHD zinc finger superfamily protein
Carubv10011314m.g	-0.0842793	0.831554	AT1G14270	0	CAAX amino terminal protease family protein
Carubv10009104m.g	-2.93656	0.011456	AT1G14280	PKS2	phytochrome kinase substrate 2
Carubv10010052m.g	-1.26403	5.36944e-07	AT1G14290	SBH2	sphingoid base hydroxylase 2
Carubv10010081m.g	-0.719462	0.0305886	AT1G14310	0	Haloacid dehalogenase-like hydrolase (HAD) superfamily protein
Carubv10010247m.g	-0.36958	0.153209	AT1G14320	RPL10,RPL10A,SAC52	Ribosomal protein L16p/L10e family protein
Carubv10009132m.g	-1.95242	7.24321e-17	AT1G14330	0	Galactose oxidase/kelch repeat superfamily protein
Carubv10010131m.g	0.853198	0.000255481	AT1G14340	0	RNA-binding (RRM/RBD/RNP motifs) family protein
Carubv10011943m.g	0.23615	0.568888	AT1G14345	0	NAD(P)-linked oxidoreductase superfamily protein
Carubv10011123m.g	0.0537316	NA	AT1G09650	0	F-box and associated interaction domains-containing protein
Carubv10011707m.g	-4.81516	9.89674e-33	AT1G14350	AtMYB124,FLP,MYB124	Duplicated homeodomain-like superfamily protein
Carubv10011652m.g	-0.0941253	0.790272	AT1G14360	ATUTR3,UTR3	UDP-galactose transporter 3
Carubv10009175m.g	-2.55759	0.0677325	AT1G14370	APK2A,PBL2	protein kinase 2A
Carubv10008540m.g	-3.4259	0.0112171	AT1G14380	IQD28	IQ-domain 28
Carubv10012614m.g	2.4837	8.66893e-05	AT1G14390	0	Leucine-rich repeat protein kinase family protein
Carubv10010548m.g	-0.583843	0.0135319	AT1G14400	ATUBC1,UBC1	ubiquitin carrier protein 1
Carubv10010024m.g	1.04185	0.000619374	AT1G14410	ATWHY1,PTAC1,WHY1	ssDNA-binding transcriptional regulator
Carubv10010727m.g	0.170431	0.918608	0	0	0
Carubv10012514m.g	-1.70305	0.00117096	AT1G14420	AT59	Pectate lyase family protein
Carubv10011386m.g	-0.838199	0.292124	AT1G14430	0	glyoxal oxidase-related protein
Carubv10009782m.g	-0.182195	0.853211	AT1G14440	AtHB31,HB31	homeobox protein 31
Carubv10010789m.g	-0.678007	0.0150906	AT1G14450	0	NADH dehydrogenase (ubiquinone)s
Carubv10011243m.g	-2.36479	NA	AT1G14455	0	0
Carubv10008136m.g	0.0978352	0.793448	AT1G14460	0	AAA-type ATPase family protein
Carubv10008784m.g	0.926681	0.0824657	AT1G14470	0	Pentatricopeptide repeat (PPR) superfamily protein
Carubv10012557m.g	2.18214	7.15342e-05	AT1G14480	0	Ankyrin repeat family protein
Carubv10012073m.g	1.64914	0.00386031	AT5G49700	0	Predicted AT-hook DNA-binding family protein
Carubv10012665m.g	-0.394452	0.813208	AT1G14500	0	Ankyrin repeat family protein
Carubv10010091m.g	0.285348	0.252797	AT1G14510	AL7	alfin-like 7
Carubv10009854m.g	1.47928	7.87197e-07	AT1G14688	0	0
Carubv10011049m.g	0.0537316	NA	AT2G02220	ATPSKR1,PSKR1	phytosulfokin receptor 1
Carubv10010078m.g	2.09492	0.00300554	AT1G63900	0	E3 Ubiquitin ligase family protein
Carubv10010461m.g	0.896665	0.207162	AT1G63900	0	E3 Ubiquitin ligase family protein
Carubv10009817m.g	3.79342	2.74245e-39	AT1G14520	MIOX1	myo-inositol oxygenase 1
Carubv10009846m.g	-1.69983	2.91933e-09	AT2G02180	TOM3	tobamovirus multiplication protein 3
Carubv10010887m.g	0.77405	NA	AT1G14540	0	Peroxidase superfamily protein
Carubv10012474m.g	0.924233	NA	AT1G14550	0	Peroxidase superfamily protein
Carubv10009700m.g	-0.260173	0.38292	AT1G14560	0	Mitochondrial substrate carrier family protein
Carubv10009052m.g	0.217917	0.397467	AT1G14570	0	UBX domain-containing protein
Carubv10009023m.g	-3.0888	2.94809e-15	AT1G14580	0	C2H2-like zinc finger protein
Carubv10012680m.g	0.0537316	NA	0	0	0
Carubv10009437m.g	0.64492	0.0498598	AT1G14590	0	Nucleotide-diphospho-sugar transferase family protein
Carubv10010057m.g	0.26313	0.845604	AT1G14600	0	Homeodomain-like superfamily protein
Carubv10011060m.g	0.101684	0.610589	AT1G14610	TWN2,VALRS	valyl-tRNA synthetase / valine--tRNA ligase (VALRS)
Carubv10012651m.g	1.45762	4.21406e-15	AT1G14620	DECOY	decoy
Carubv10010032m.g	4.08791	2.10682e-06	AT1G14630	0	0
Carubv10011640m.g	0.587963	0.0454467	AT1G14650	0	SWAP (Suppressor-of-White-APricot)/surp domain-containing protein / ubiquitin family protein
Carubv10008350m.g	0.109073	0.607464	AT1G14650	0	SWAP (Suppressor-of-White-APricot)/surp domain-containing protein / ubiquitin family protein
Carubv10011936m.g	0.809838	0.0119091	AT1G14660	ATNHX8,NHX8	Na+/H+ exchanger 8
Carubv10008657m.g	-1.95688	2.15452e-18	AT1G14670	0	Endomembrane protein 70 protein family
Carubv10009927m.g	-0.788163	0.0950398	AT1G14680	0	0
Carubv10009978m.g	-1.02254	9.96586e-09	AT1G14685	ATBPC2,BBR/BPC2,BPC2	basic pentacysteine 2
Carubv10011056m.g	0.150095	0.93778	AT1G14686	0	ENTH/ANTH/VHS superfamily protein
Carubv10010471m.g	-1.87002	0.000727237	AT1G14687	AtHB32,HB32	homeobox protein 32
Carubv10012320m.g	0.755201	0.0152284	AT1G14690	MAP65-7	microtubule-associated protein 65-7
Carubv10008596m.g	-0.476493	0.0344422	AT1G14710	0	hydroxyproline-rich glycoprotein family protein
Carubv10009442m.g	1.7295	0.0143759	AT1G14720	ATXTH28,EXGT-A2,XTH28,XTR2	xyloglucan endotransglucosylase/hydrolase 28
Carubv10010271m.g	-1.11098	4.34182e-05	AT1G14730	0	Cytochrome b561/ferric reductase transmembrane protein family
Carubv10008407m.g	-0.551458	0.0643702	AT1G14740	0	Protein of unknown function (DUF1423)
Carubv10011369m.g	2.09628	0.126836	AT1G14315	0	F-box and associated interaction domains-containing protein
Carubv10010916m.g	-0.617198	0.565296	AT1G14750	SDS	Cyclin family protein
Carubv10011088m.g	5.41544	1.43699e-16	AT1G14755	0	S locus-related glycoprotein 1 (SLR1) binding pollen coat protein family
Carubv10011432m.g	2.36423	0.0745012	AT1G14760	KNATM	KNOX Arabidopsis thaliana meinox
Carubv10009280m.g	0.280886	0.424746	AT1G14770	0	RING/FYVE/PHD zinc finger superfamily protein
Carubv10008542m.g	-0.934807	0.481482	AT1G14780	0	MAC/Perforin domain-containing protein
Carubv10008144m.g	-0.233913	0.447687	AT1G14790	ATRDRP1,RDR1	RNA-dependent RNA polymerase 1
Carubv10009340m.g	1.16729	1.26238e-06	AT1G14810	0	semialdehyde dehydrogenase family protein
Carubv10010095m.g	1.6643	3.28157e-12	AT1G14820	0	Sec14p-like phosphatidylinositol transfer family protein
Carubv10008553m.g	-1.81115	7.73488e-20	AT1G14830	ADL1C,ADL5,DL1C,DRP1C	DYNAMIN-like 1C
Carubv10008632m.g	1.24464	3.54178e-09	AT1G14840	ATMAP70-4,MAP70-4	microtubule-associated proteins 70-4
Carubv10012399m.g	0.128255	0.557587	AT1G14850	NUP155	nucleoporin 155
Carubv10010439m.g	-0.705215	NA	AT1G14860	atnudt18,NUDT18	nudix hydrolase homolog 18
Carubv10010549m.g	4.13014	8.78948e-11	AT1G14870	PCR2	PLANT CADMIUM RESISTANCE 2
Carubv10010160m.g	0.604094	0.313744	AT1G14890	0	Plant invertase/pectin methylesterase inhibitor superfamily protein
Carubv10010056m.g	-1.05397	0.00178687	AT1G14900	HMGA	high mobility group A
Carubv10008396m.g	-0.730785	1.15812e-05	AT1G14910	0	ENTH/ANTH/VHS superfamily protein
Carubv10008833m.g	0.962243	0.000494554	AT1G14920	GAI,RGA2	GRAS family transcription factor family protein
Carubv10011229m.g	1.06124	NA	AT1G14940	0	Polyketide cyclase/dehydrase and lipid transport superfamily protein
Carubv10011506m.g	0.40997	NA	AT1G14950	0	Polyketide cyclase/dehydrase and lipid transport superfamily protein
Carubv10011497m.g	0.0537316	NA	AT1G30990	0	Polyketide cyclase/dehydrase and lipid transport superfamily protein
Carubv10008744m.g	-7.47117	4.52067e-91	AT1G14970	0	O-fucosyltransferase family protein
Carubv10010732m.g	-0.0674229	0.815747	AT1G14980	CPN10	chaperonin 10
Carubv10010473m.g	1.3235	2.46611e-05	AT1G14990	0	0
Carubv10009146m.g	-0.708741	0.271577	AT1G15000	scpl50	serine carboxypeptidase-like 50
Carubv10010520m.g	1.45266	0.027237	AT1G15010	0	0
Carubv10008729m.g	-0.0722854	0.803399	AT1G15020	ATQSOX1,QSO2,QSOX1	quiescin-sulfhydryl oxidase 1
Carubv10009528m.g	-0.403111	0.151312	AT1G15030	0	Protein of unknown function (DUF789)
Carubv10011706m.g	2.70572	0.000170743	AT1G15040	0	Class I glutamine amidotransferase-like superfamily protein
Carubv10011905m.g	-3.13719	0.000135848	AT1G15050	IAA34	indole-3-acetic acid inducible 34
Carubv10012334m.g	0.497439	0.0334551	AT1G15060	0	Uncharacterised conserved protein UCP031088, alpha/beta hydrolase
Carubv10009800m.g	1.04035	0.0311921	AT1G15080	ATLPP2,ATPAP2,LPP2	lipid phosphate phosphatase 2
Carubv10010511m.g	-2.01464	2.47437e-08	AT1G15100	RHA2A	RING-H2 finger A2A
Carubv10011550m.g	0.528496	0.122133	AT1G15110	0	phosphatidyl serine synthase family protein
Carubv10010817m.g	-0.474779	0.0574627	AT1G15120	0	Ubiquinol-cytochrome C reductase hinge protein
Carubv10009591m.g	-0.809149	NA	AT1G15125	0	S-adenosyl-L-methionine-dependent methyltransferases superfamily protein
Carubv10008299m.g	-0.398654	0.0727185	AT1G15130	0	Endosomal targeting BRO1-like domain-containing protein
Carubv10009891m.g	-1.07128	9.79954e-05	AT1G15140	0	FAD/NAD(P)-binding oxidoreductase
Carubv10011851m.g	3.13838	3.46584e-13	AT1G15160	0	MATE efflux family protein
Carubv10008971m.g	0.23208	0.394182	AT1G15170	0	MATE efflux family protein
Carubv10010136m.g	2.17227	0.00716888	AT1G15190	0	Fasciclin-like arabinogalactan family protein
Carubv10011586m.g	-0.232948	0.311776	AT1G15200	0	protein-protein interaction regulator family protein
Carubv10012050m.g	1.92165	1.1226e-05	AT1G15210	ATPDR7,PDR7	pleiotropic drug resistance 7
Carubv10010379m.g	0.867806	0.048124	AT1G15215	0	0
Carubv10010517m.g	0.45924	NA	AT1G15220	ATCCMH,CCMH	cytochrome c biogenesis protein family
Carubv10011666m.g	0.0537316	NA	AT1G15230	0	0
Carubv10008179m.g	-0.697711	0.000390964	AT1G15240	0	Phox-associated domain;Phox-like;Sorting nexin, C-terminal
Carubv10011974m.g	0.0537316	NA	AT1G15250	0	Zinc-binding ribosomal protein family protein
Carubv10011308m.g	0.76116	0.0562882	AT1G15260	0	0
Carubv10011034m.g	-0.0693124	0.770662	AT1G15280	0	CASC3/Barentsz eIF4AIII binding
Carubv10011596m.g	0.274789	0.232437	AT1G15290	0	Tetratricopeptide repeat (TPR)-like superfamily protein
Carubv10011179m.g	0.869783	9.22799e-05	AT3G42170	0	BED zinc finger ;hAT family dimerisation domain
Carubv10011752m.g	-0.692352	0.256757	AT1G15320	0	0
Carubv10011907m.g	0.0537316	NA	AT1G15330	0	Cystathionine beta-synthase (CBS) protein
Carubv10009517m.g	0.674692	0.00362523	AT1G15340	MBD10	methyl-CPG-binding domain 10
Carubv10011587m.g	-0.233081	0.582877	AT1G15350	0	0
Carubv10010317m.g	-0.56799	NA	AT1G15360	SHN1,WIN1	Integrase-type DNA-binding superfamily protein
Carubv10010572m.g	-1.88836	5.89662e-17	AT1G15370	0	SNARE-like superfamily protein
Carubv10010450m.g	-4.41567	2.13105e-11	AT1G15380	0	Lactoylglutathione lyase / glyoxalase I family protein
Carubv10012662m.g	0.108171	0.95835	AT1G15385	0	0
Carubv10011124m.g	0.192163	0.578789	AT1G15390	ATDEF1,PDF1A	peptide deformylase 1A
Carubv10010935m.g	0.454476	0.193991	AT1G15400	0	0
Carubv10009705m.g	-1.86594	9.52994e-06	AT1G15410	0	aspartate-glutamate racemase family
Carubv10011465m.g	-0.82669	0.603146	AT1G15415	0	0
Carubv10009844m.g	0.813693	0.00124695	AT1G15420	0	0
Carubv10010051m.g	0.118151	0.705526	AT1G15430	0	Protein of unknown function (DUF1644)
Carubv10008260m.g	0.668219	0.00480435	AT1G15440	ATPWP2,PWP2	periodic tryptophan protein 2
Carubv10011515m.g	3.13741	1.98331e-36	AT1G15460	ATBOR4,BOR4	HCO3- transporter family
Carubv10009691m.g	-0.504767	0.025096	AT1G15470	0	Transducin/WD40 repeat-like superfamily protein
Carubv10008643m.g	-0.760635	0.00178304	AT1G15480	0	Tetratricopeptide repeat (TPR)-like superfamily protein
Carubv10008598m.g	0.925989	3.13215e-05	AT1G15500	ATNTT2	TLC ATP/ADP transporter
Carubv10012185m.g	0.0537316	NA	AT1G15510	ATECB2,ECB2,VAC1	Tetratricopeptide repeat (TPR)-like superfamily protein
Carubv10008103m.g	0.0126415	0.986219	AT1G15520	ABCG40,ATABCG40,ATPDR12,PDR12	pleiotropic drug resistance 12
Carubv10012446m.g	-0.317423	0.239668	AT1G15530	0	Concanavalin A-like lectin protein kinase family protein
Carubv10011635m.g	-0.26663	NA	AT1G15540	0	2-oxoglutarate (2OG) and Fe(II)-dependent oxygenase superfamily protein
Carubv10009532m.g	-0.878691	0.15374	AT1G15550	ATGA3OX1,GA3OX1,GA4	gibberellin 3-oxidase 1
Carubv10009125m.g	0.599506	0.310413	AT1G15570	CYCA2;3	CYCLIN A2;3
Carubv10010519m.g	0.0537316	NA	AT1G15580	ATAUX2-27,AUX2-27,IAA5	indole-3-acetic acid inducible 5
Carubv10012253m.g	1.122	NA	AT1G15590	0	0
Carubv10012406m.g	0.732822	NA	AT3G61180	0	RING/U-box superfamily protein
Carubv10012480m.g	0.0537316	NA	AT1G15600	0	0
Carubv10012391m.g	2.92233	0.0206938	AT1G15610	0	0
Carubv10012152m.g	0.0537316	NA	AT1G15620	0	0
Carubv10011228m.g	0.0537316	NA	AT1G15630	0	0
Carubv10010088m.g	0.0537316	NA	AT1G15620	0	0
Carubv10012088m.g	-0.939145	NA	AT1G15610	0	0
Carubv10012205m.g	-0.374373	NA	AT1G80400	0	RING/U-box superfamily protein
Carubv10008413m.g	-0.17014	0.539069	AT1G15660	CENP-C	centromere protein C
Carubv10009534m.g	-1.66548	1.07288e-05	AT1G15670	0	Galactose oxidase/kelch repeat superfamily protein
Carubv10008378m.g	-1.79534	5.92547e-13	AT1G15690	ATAVP3,AtVHP1;1,AVP-3,AVP1	Inorganic H pyrophosphatase family protein
Carubv10011380m.g	0.0537316	NA	AT1G15700	ATPC2	ATPase, F1 complex, gamma subunit protein
Carubv10011791m.g	-0.684266	NA	AT1G15720	TRFL5	TRF-like 5
Carubv10009134m.g	2.94906	7.48024e-31	AT1G15730	0	Cobalamin biosynthesis CobW-like protein
Carubv10010899m.g	0.0537316	NA	AT1G15740	0	Leucine-rich repeat family protein
Carubv10008139m.g	0.00271054	0.989958	AT1G15750	TPL,WSIP1	Transducin family protein / WD-40 repeat family protein
Carubv10012352m.g	5.83432	3.08556e-14	AT1G15757	0	Molecular chaperone Hsp40/DnaJ family protein
Carubv10012382m.g	0.0537316	NA	AT1G15760	0	Sterile alpha motif (SAM) domain-containing protein
Carubv10008730m.g	-2.35039	9.19722e-13	AT1G80530	0	Major facilitator superfamily protein
Carubv10012388m.g	1.92121	0.00255251	AT1G15780	0	0
Carubv10008733m.g	-4.01201	8.66297e-12	AT1G15780	0	0
Carubv10008096m.g	-0.183109	0.284721	AT1G15780	0	0
Carubv10010293m.g	-0.295353	0.539069	AT1G15800	0	0
Carubv10012290m.g	0.0537316	NA	AT1G15810	0	S15/NS1, RNA-binding protein
Carubv10010058m.g	0.0461136	0.916848	AT1G15820	CP24,LHCB6	light harvesting complex photosystem II subunit 6
Carubv10011155m.g	1.2919	0.0495093	AT1G15830	0	0
Carubv10010411m.g	1.15928	0.000483215	AT4G00420	0	Double-stranded RNA-binding domain (DsRBD)-containing protein
Carubv10010104m.g	-0.559947	0.0149125	AT1G15860	0	Domain of unknown function (DUF298)
Carubv10012435m.g	0.742334	0.233872	AT1G15870	0	Mitochondrial glycoprotein family protein
Carubv10010239m.g	-0.613171	0.00261465	AT1G15880	atgos11,GOS11	golgi snare 11
Carubv10012171m.g	1.66464	0.00151238	AT1G15890	0	Disease resistance protein (CC-NBS-LRR class) family
Carubv10011590m.g	-2.21649	0.00397676	AT1G15900	0	0
Carubv10008566m.g	0.663019	0.00122368	AT1G15910	0	XH/XS domain-containing protein
Carubv10009915m.g	-0.296983	0.304636	AT1G15920	0	Polynucleotidyl transferase, ribonuclease H-like superfamily protein
Carubv10010589m.g	0.776258	0.00265645	AT2G32060	0	Ribosomal protein L7Ae/L30e/S12e/Gadd45 family protein
Carubv10008168m.g	-0.0110007	0.966807	AT1G15940	0	Tudor/PWWP/MBT superfamily protein
Carubv10009629m.g	2.25304	1.21264e-15	AT1G15950	ATCCR1,CCR1,IRX4	cinnamoyl coa reductase 1
Carubv10008854m.g	4.94077	1.13735e-06	AT1G15960	ATNRAMP6,NRAMP6	NRAMP metal ion transporter 6
Carubv10009599m.g	-0.208956	0.429506	AT1G15970	0	DNA glycosylase superfamily protein
Carubv10009072m.g	-1.53499	0.000287113	AT1G15980	NDF1,NDH48	NDH-dependent cyclic electron flow 1
Carubv10008459m.g	-4.29813	7.65907e-13	AT1G15990	ATCNGC7,CNGC7	cyclic nucleotide gated channel 7
Carubv10010772m.g	0.13271	0.737332	AT1G16000	0	0
Carubv10010853m.g	0.0537316	NA	AT1G16010	MGT2,MRS2-1	magnesium transporter 2
Carubv10012180m.g	-0.65124	0.20664	AT1G16020	0	Protein of unknown function (DUF1712)
Carubv10010659m.g	-0.528265	0.54028	AT1G16022	0	0
Carubv10012149m.g	0.111506	0.728016	AT1G16030	Hsp70b	heat shock protein 70B
Carubv10010172m.g	-0.592888	0.0313857	AT1G16040	0	0
Carubv10010918m.g	-1.3515	0.0102552	AT1G16060	ADAP	ARIA-interacting double AP2 domain protein
Carubv10009355m.g	0.817116	0.268656	AT1G16070	AtTLP8,TLP8	tubby like protein 8
Carubv10009813m.g	0.634336	0.103882	AT1G16080	0	0
Carubv10008430m.g	0.307052	NA	AT1G16120	WAKL1	wall associated kinase-like 1
Carubv10008263m.g	3.14871	0.00416978	AT1G16150	WAKL4	wall associated kinase-like 4
Carubv10009505m.g	-0.157749	0.917099	AT1G16160	WAKL5	wall associated kinase-like 5
Carubv10010756m.g	-1.13267	0.000291063	AT1G79660	0	0
Carubv10009295m.g	-0.991533	5.02874e-07	AT1G16180	0	Serinc-domain containing serine and sphingolipid biosynthesis protein
Carubv10011879m.g	-0.0289299	0.927338	AT1G16190	RAD23A	Rad23 UV excision repair protein family
Carubv10010180m.g	0.0210133	0.942794	AT1G16210	0	0
Carubv10011374m.g	0.457672	0.64775	AT1G16220	0	Protein phosphatase 2C family protein
Carubv10010186m.g	-0.566571	0.0113309	AT1G16240	ATSYP51,SYP51	syntaxin of plants 51
Carubv10009433m.g	-0.914728	0.00013542	AT1G16250	0	Galactose oxidase/kelch repeat superfamily protein
Carubv10011235m.g	-0.698767	NA	AT1G16260	0	Wall-associated kinase family protein
Carubv10008134m.g	-0.453636	0.0408786	AT1G16270	0	Protein kinase superfamily protein with octicosapeptide/Phox/Bem1p domain
Carubv10012273m.g	0.702684	0.0100214	AT1G16280	AtRH36,RH36,SWA3	RNA helicase 36
Carubv10009260m.g	0.827119	0.0130254	AT1G16290	0	0
Carubv10009227m.g	0.202298	0.34997	AT1G16300	GAPCP-2	glyceraldehyde-3-phosphate dehydrogenase of plastid 2
Carubv10009337m.g	-3.36482	1.18352e-06	AT1G16310	0	Cation efflux family protein
Carubv10009990m.g	-0.420027	0.0981219	AT1G16320	0	Uncharacterized conserved protein (DUF2358)
Carubv10012501m.g	0.709166	0.0833331	AT1G16330	CYCB3;1	cyclin b3;1
Carubv10012219m.g	0.379246	0.20537	AT1G16340	ATKDSA2,ATKSDA	Aldolase superfamily protein
Carubv10008910m.g	1.77055	4.88087e-13	AT1G16350	0	Aldolase-type TIM barrel family protein
Carubv10012317m.g	0.34706	NA	AT1G16360	0	LEM3 (ligand-effect modulator 3) family protein / CDC50 family protein
Carubv10011578m.g	3.73549	0.000109034	AT1G16370	ATOCT6,OCT6	organic cation/carnitine transporter 6
Carubv10011761m.g	-0.253644	0.897395	AT1G16380	ATCHX1,CHX1	Cation/hydrogen exchanger family protein
Carubv10011593m.g	-2.16392	0.0484793	AT1G16390	3-Oct,ATOCT3	organic cation/carnitine transporter 3
Carubv10011470m.g	-3.27993	5.78743e-11	AT1G16410	BUS1,CYP79F1,SPS1	cytochrome p450 79f1
Carubv10010983m.g	-2.05822	0.010883	AT1G16410	BUS1,CYP79F1,SPS1	cytochrome p450 79f1
Carubv10011040m.g	0.0537316	NA	AT1G16420	ATMC8,MC8	metacaspase 8
Carubv10010555m.g	1.41536	0.00788191	AT1G07950	MED22B	Surfeit locus protein 5 subunit 22 of Mediator complex
Carubv10011491m.g	-1.17829	0.523765	AT1G16440	RSH3	root hair specific 3
Carubv10009502m.g	-0.155622	0.610167	AT1G79230	ATMST1,ATRDH1,MST1,ST1,STR1	mercaptopyruvate sulfurtransferase 1
Carubv10010173m.g	0.291931	0.211414	AT1G16470	PAB1	proteasome subunit PAB1
Carubv10011798m.g	0.806167	0.00718204	AT1G16480	0	Tetratricopeptide repeat (TPR)-like superfamily protein
Carubv10011190m.g	0.744765	0.096928	AT1G16490	ATMYB58,MYB58	myb domain protein 58
Carubv10008803m.g	0.0537316	NA	AT5G28823	0	0
Carubv10010153m.g	-2.75138	5.81793e-12	AT1G16500	0	0
Carubv10011035m.g	-3.85826	2.54169e-06	AT1G16510	0	SAUR-like auxin-responsive protein family
Carubv10009722m.g	-0.307055	0.408719	AT1G16520	0	0
Carubv10010749m.g	0.0216203	0.990577	AT1G16530	ASL9,LBD3	ASYMMETRIC LEAVES 2-like 9
Carubv10011147m.g	-2.6569	2.81377e-40	AT1G16540	ABA3,ACI2,ATABA3,LOS5,SIR3	molybdenum cofactor sulfurase (LOS5) (ABA3)
Carubv10010913m.g	1.68511	2.08067e-07	AT3G01610	CDC48C,emb1354	cell division cycle 48C
Carubv10009543m.g	0.92509	NA	AT1G16560	0	Per1-like family protein
Carubv10008948m.g	-0.880465	0.00486474	AT1G16570	0	UDP-Glycosyltransferase superfamily protein
Carubv10010297m.g	0.243122	0.57681	AT1G16590	ATREV7,REV7	DNA-binding HORMA family protein
Carubv10008384m.g	1.21591	0.223839	AT1G78960	ATLUP2,LUP2	lupeol synthase 2
Carubv10009275m.g	-0.221441	0.363553	AT1G16610	RNPS1,SR45	arginine/serine-rich 45
Carubv10008298m.g	-0.747345	0.137779	AT1G16630	0	0
Carubv10012547m.g	0.248997	0.724295	AT1G16640	0	AP2/B3-like transcriptional factor family protein
Carubv10009211m.g	0.482887	0.135203	AT1G16650	0	S-adenosyl-L-methionine-dependent methyltransferases superfamily protein
Carubv10012041m.g	-0.706814	0.0283433	AT1G16670	0	Protein kinase superfamily protein
Carubv10008751m.g	-0.358742	0.21274	AT1G16680	0	Chaperone DnaJ-domain superfamily protein
Carubv10009354m.g	-0.721464	0.0062976	AT1G16690	0	Enhancer of polycomb-like transcription factor protein
Carubv10010241m.g	-0.699784	0.00321646	AT1G16700	0	Alpha-helical ferredoxin
Carubv10010638m.g	-2.48972	1.58682e-19	AT1G16705	0	p300/CBP acetyltransferase-related protein-related
Carubv10008082m.g	-0.230364	0.200263	AT1G16710	HAC12	histone acetyltransferase of the CBP family 12
Carubv10008646m.g	-0.280234	0.258414	AT1G16720	HCF173	high chlorophyll fluorescence phenotype 173
Carubv10012617m.g	0.0537316	NA	AT1G16730	UP6	unknown protein 6
Carubv10010647m.g	0.461408	0.246985	AT1G16740	0	Ribosomal protein L20
Carubv10008799m.g	-0.347642	NA	AT1G16750	0	Protein of unknown function, DUF547
Carubv10010903m.g	1.05517	0.574165	AT1G16760	0	Protein kinase protein with adenine nucleotide alpha hydrolases-like domain
Carubv10011789m.g	-1.13509	0.5471	AT1G16770	0	0
Carubv10011947m.g	0.0537316	NA	AT1G16790	0	ribosomal protein-related
Carubv10008065m.g	-0.283807	0.28966	AT1G16800	0	P-loop containing nucleoside triphosphate hydrolases superfamily protein
Carubv10012679m.g	0.241252	0.316156	AT1G16810	0	0
Carubv10010539m.g	-2.02113	1.37884e-06	AT1G16825	0	Reticulon family protein
Carubv10008619m.g	-0.177867	0.619013	AT1G16830	0	Pentatricopeptide repeat (PPR) superfamily protein
Carubv10010301m.g	-1.22612	1.16955e-08	AT1G16840	0	0
Carubv10010543m.g	-3.66115	3.99992e-06	AT1G16850	0	0
Carubv10009033m.g	-3.09585	4.6522e-34	AT1G16860	0	Ubiquitin-specific protease family C19-related protein
Carubv10009019m.g	0.18611	0.434002	AT1G16870	0	mitochondrial 28S ribosomal protein S29-related
Carubv10009908m.g	-3.45329	6.41276e-05	AT1G16880	0	uridylyltransferase-related
Carubv10010547m.g	-0.57719	0.00668632	AT1G16890	UBC13B,UBC36	ubiquitin-conjugating enzyme 36
Carubv10008626m.g	0.128139	0.62867	AT1G16900	0	Alg9-like mannosyltransferase family
Carubv10010818m.g	0.2651	0.452135	AT1G16916	0	0
Carubv10010133m.g	0.311658	0.281358	AT1G16920	ATRABA1B,RAB11,RABA1b	RAB GTPase homolog A1B
Carubv10009120m.g	0.0562187	0.881519	AT1G16930	0	F-box/RNI-like/FBD-like domains-containing protein
Carubv10012478m.g	1.24919	0.553098	AT1G16950	0	0
Carubv10010695m.g	-1.18706	NA	AT1G16960	0	Ubiquitin domain-containing protein
Carubv10008595m.g	0.736062	0.0103482	AT1G16970	ATKU70,KU70	KU70 homolog
Carubv10012173m.g	3.8278	1.37631e-05	AT1G16980	ATTPS2,TPS2	trehalose-phosphatase/synthase 2
Carubv10010858m.g	-0.0703271	0.865404	AT1G17010	0	2-oxoglutarate (2OG) and Fe(II)-dependent oxygenase superfamily protein
Carubv10009827m.g	3.67095	2.40117e-08	AT1G17020	ATSRG1,SRG1	senescence-related gene 1
Carubv10008922m.g	-0.532662	0.179073	AT1G17030	0	0
Carubv10011338m.g	0.284005	0.247414	AT1G17040	ATSHA,SHA,STATLA	SH2 domain protein A
Carubv10009229m.g	-0.974946	0.0470317	AT1G17050	SPS2	solanesyl diphosphate synthase 2
Carubv10008841m.g	-2.15307	3.41363e-11	AT1G17060	CYP72C1,SOB7	cytochrome p450 72c1
Carubv10012542m.g	0.0537316	NA	AT1G17070	0	GC-rich sequence DNA-binding factor-like protein with Tuftelin interacting domain
Carubv10010518m.g	-0.62427	0.00949163	AT1G17080	0	Ribosomal protein L18ae family
Carubv10011434m.g	0.398218	0.709473	AT1G17090	0	0
Carubv10010190m.g	0.844781	0.000148486	AT1G17100	0	SOUL heme-binding family protein
Carubv10011568m.g	0.0573127	0.850993	AT1G17110	UBP15	ubiquitin-specific protease 15
Carubv10008669m.g	-1.18357	1.24125e-05	AT1G17120	CAT8	cationic amino acid transporter 8
Carubv10009751m.g	0.00432827	0.986839	AT1G17130	0	Family of unknown function (DUF572)
Carubv10009626m.g	0.0537316	NA	AT1G17140	ICR1,RIP1	interactor of constitutive active rops 1
Carubv10010828m.g	2.97911	0.0189304	AT1G17145	0	RING/U-box superfamily protein
Carubv10010726m.g	-0.0437649	0.975558	AT1G17147	0	VQ motif-containing protein
Carubv10011686m.g	5.0248	2.23974e-07	AT1G17150	0	Pectin lyase-like superfamily protein
Carubv10009429m.g	-0.337973	0.216081	AT1G17160	0	pfkB-like carbohydrate kinase family protein
Carubv10010098m.g	2.44407	0.0492689	AT1G17170	ATGSTU24,GST,GSTU24	glutathione S-transferase TAU 24
Carubv10010257m.g	-1.69621	0.0208065	AT1G17180	ATGSTU25,GSTU25	glutathione S-transferase TAU 25
Carubv10010264m.g	-4.38589	1.82145e-68	AT1G17190	ATGSTU26,GSTU26	glutathione S-transferase tau 26
Carubv10010315m.g	-1.25395	2.64854e-06	AT1G17200	0	Uncharacterised protein family (UPF0497)
Carubv10011970m.g	0.725863	0.00569989	AT1G17210	ATILP1,ILP1	IAP-like protein 1
Carubv10008177m.g	-0.0927529	0.741326	AT1G17220	FUG1	Translation initiation factor 2, small GTP-binding protein
Carubv10008143m.g	-0.357332	0.685469	AT1G17230	0	Leucine-rich receptor-like protein kinase family protein
Carubv10008225m.g	4.2223	1.5609e-64	AT1G17260	AHA10	autoinhibited H(+)-ATPase isoform 10
Carubv10010876m.g	3.55014	0.00355393	AT1G53750	RPT1A	regulatory particle triple-A 1A
Carubv10008696m.g	-0.115231	0.700983	AT1G17270	0	O-fucosyltransferase family protein
Carubv10010163m.g	-1.03345	2.63969e-06	AT1G17280	UBC34	ubiquitin-conjugating enzyme 34
Carubv10011991m.g	-1.55284	0.374091	AT1G17285	0	0
Carubv10008780m.g	0.441145	0.0554749	AT1G17290	AlaAT1	alanine aminotransferas
Carubv10011075m.g	1.90962	0.30349	AT1G17310	0	MADS-box transcription factor family protein
Carubv10010080m.g	2.69914	9.23993e-07	AT1G17330	0	Metal-dependent phosphohydrolase
Carubv10011400m.g	1.245	1.23102e-05	AT1G17340	0	Phosphoinositide phosphatase family protein
Carubv10010944m.g	-0.956259	NA	AT1G17345	0	SAUR-like auxin-responsive protein family
Carubv10010222m.g	-0.380021	0.162243	AT1G17350	0	NADH:ubiquinone oxidoreductase intermediate-associated protein 30
Carubv10008164m.g	-0.410062	0.387791	AT1G17360	0	0
Carubv10009263m.g	-0.116939	0.629541	AT1G17370	UBP1B	oligouridylate binding protein 1B
Carubv10009758m.g	0.750085	0.115045	AT1G17380	JAZ5,TIFY11A	jasmonate-zim-domain protein 5
Carubv10009828m.g	-0.374373	NA	AT1G17400	0	0
Carubv10010406m.g	-0.662778	0.0346254	AT1G17410	0	Nucleoside diphosphate kinase family protein
Carubv10008244m.g	-1.11152	2.19355e-06	AT1G17420	LOX3	lipoxygenase 3
Carubv10009687m.g	0.352451	0.260936	AT1G17430	0	alpha/beta-Hydrolases superfamily protein
Carubv10008470m.g	-0.689708	0.000933874	AT1G17440	EER4,TAF12B	Transcription initiation factor TFIID subunit A
Carubv10008077m.g	-0.48951	0.017628	AT1G17450	0	B-block binding subunit of TFIIIC
Carubv10011591m.g	0.0537316	NA	AT1G17455	ELF4-L4	ELF4-like 4
Carubv10012426m.g	0.492027	0.220614	AT1G17460	TRFL3	TRF-like 3
Carubv10009345m.g	-0.133132	0.546077	AT1G17470	ATDRG,ATDRG1,DRG1	developmentally regulated G-protein 1
Carubv10012653m.g	-0.211359	0.874077	AT1G17480	IQD7	IQ-domain 7
Carubv10010545m.g	-0.0351975	0.919845	AT1G17490	0	0
Carubv10008113m.g	-2.86544	5.34113e-23	AT1G17500	0	ATPase E1-E2 type family protein / haloacid dehalogenase-like hydrolase family protein
Carubv10010655m.g	0.0537316	NA	AT1G17510	0	0
Carubv10009890m.g	-0.0199907	0.94757	AT1G17520	0	Homeodomain-like/winged-helix DNA-binding family protein
Carubv10012124m.g	-1.34057	0.00956076	AT1G17530	ATTIM23-1,TIM23-1	translocase of inner mitochondrial membrane 23
Carubv10008461m.g	0.0548688	0.941254	AT1G17540	0	Protein kinase protein with adenine nucleotide alpha hydrolases-like domain
Carubv10011883m.g	0.0537316	NA	AT1G17550	HAB2	homology to ABI2
Carubv10009389m.g	-1.68507	1.96903e-16	AT1G17550	HAB2	homology to ABI2
Carubv10010419m.g	0.291646	0.237217	AT1G17560	HLL	Ribosomal protein L14p/L23e family protein
Carubv10011741m.g	-2.00686	3.77927e-14	AT1G17580	ATMYA1,MYA1,XI-1	myosin 1
Carubv10009470m.g	0.458131	NA	AT1G17615	0	Disease resistance protein (TIR-NBS class)
Carubv10010038m.g	-1.59597	2.19696e-06	AT1G17620	0	Late embryogenesis abundant (LEA) hydroxyproline-rich glycoprotein family
Carubv10011006m.g	1.26826	0.0240288	AT1G17630	0	Pentatricopeptide repeat (PPR-like) superfamily protein
Carubv10012031m.g	-0.883859	0.00438611	AT1G17640	0	RNA-binding (RRM/RBD/RNP motifs) family protein
Carubv10011580m.g	0.438044	0.106736	AT1G17650	GLYR2,GR2	glyoxylate reductase 2
Carubv10011678m.g	1.36161	0.00497723	AT1G17665	0	0
Carubv10008264m.g	0.0764212	0.760972	AT1G17680	0	tetratricopeptide repeat (TPR)-containing protein
Carubv10012647m.g	0.42761	0.0924697	AT1G17690	NOF1	0
Carubv10011150m.g	-0.35876	0.869153	AT1G17700	PRA1.F1	prenylated RAB acceptor 1.F1
Carubv10011086m.g	0.908277	0.169017	AT1G17710	0	Pyridoxal phosphate phosphatase-related protein
Carubv10008904m.g	-0.550676	0.00120765	AT1G17720	ATB BETA	Protein phosphatase 2A, regulatory subunit PR55
Carubv10010323m.g	-0.488484	0.0914971	AT1G17730	CHMP1B,VPS46.1	vacuolar protein sorting 46.1
Carubv10008585m.g	5.02253	6.71754e-85	AT1G17745	PGDH	D-3-phosphoglycerate dehydrogenase
Carubv10011893m.g	0.576684	0.0131649	AT1G17750	AtPEPR2,PEPR2	PEP1 receptor 2
Carubv10011584m.g	-0.0886003	0.682897	AT1G17760	ATCSTF77,CSTF77	Tetratricopeptide repeat (TPR)-like superfamily protein
Carubv10011407m.g	3.69972	NA	AT1G17770	SDG17,SUVH7	SU(VAR)3-9 homolog 7
Carubv10012112m.g	-1.37913	0.0142772	AT1G17780	0	0
Carubv10009010m.g	-0.0670014	0.83126	AT1G17790	0	DNA-binding bromodomain-containing protein
Carubv10011266m.g	5.8911	5.09488e-17	AT1G17800	AtENODL22,ENODL22	early nodulin-like protein 22
Carubv10012552m.g	3.23397	6.59603e-05	AT1G17810	BETA-TIP	beta-tonoplast intrinsic protein
Carubv10008308m.g	-0.208687	0.419646	AT1G17820	0	Putative integral membrane protein conserved region (DUF2404)
Carubv10009679m.g	4.1179	2.12679e-16	AT1G17830	0	Protein of unknown function (DUF789)
Carubv10008462m.g	-0.250836	0.390578	AT1G17840	ABCG11,ATWBC11,COF1,DSO,WBC11	white-brown complex homolog protein 11
Carubv10010974m.g	-0.00421007	0.994868	AT1G17850	0	Rhodanese/Cell cycle control phosphatase superfamily protein
Carubv10011616m.g	3.85433	1.99006e-58	AT1G17860	0	Kunitz family trypsin and protease inhibitor protein
Carubv10011415m.g	-0.97892	0.00192729	AT1G17870	ATEGY3,EGY3	ethylene-dependent gravitropism-deficient and yellow-green-like 3
Carubv10010502m.g	0.207103	0.263574	AT1G17880	ATBTF3,BTF3	basic transcription factor 3
Carubv10009714m.g	-0.0708439	0.786992	AT1G17890	GER2	NAD(P)-binding Rossmann-fold superfamily protein
Carubv10008485m.g	-0.496242	0.127061	AT1G17920	HDG12	homeodomain GLABROUS 12
Carubv10009018m.g	0.517324	0.036119	AT1G17930	0	Aminotransferase-like, plant mobile domain family protein
Carubv10009322m.g	0.155349	0.726888	AT1G17940	0	Endosomal targeting BRO1-like domain-containing protein
Carubv10012605m.g	0.409376	NA	AT1G17950	ATMYB52,BW52,MYB52	myb domain protein 52
Carubv10008521m.g	4.13802	7.33886e-08	AT5G26830	0	Threonyl-tRNA synthetase
Carubv10009526m.g	-1.78524	7.50439e-07	AT1G17970	0	RING/U-box superfamily protein
Carubv10008394m.g	-0.746774	0.000432091	AT1G17980	PAPS1	poly(A) polymerase 1
Carubv10009079m.g	0.770308	0.195197	AT1G18010	0	Major facilitator superfamily protein
Carubv10012098m.g	-2.75863	0.000507296	AT1G76690	ATOPR2,OPR2	12-oxophytodienoate reductase 2
Carubv10011250m.g	-1.11761	0.00441379	AT1G18030	0	Protein phosphatase 2C family protein
Carubv10011276m.g	-0.928175	0.00228421	AT1G18040	AT;CDCKD;3,CAK2AT,CDKD1;3	cyclin-dependent kinase D1;3
Carubv10011009m.g	-0.62029	0.163744	AT1G18060	0	0
Carubv10008818m.g	-0.398599	0.0345888	AT1G18070	0	Translation elongation factor EF1A/initiation factor IF2gamma family protein
Carubv10009720m.g	0.529	0.0459468	AT1G18080	ATARCA,RACK1A,RACK1A_AT	Transducin/WD40 repeat-like superfamily protein
Carubv10008695m.g	0.077159	0.840024	AT1G18090	0	5\'-3\' exonuclease family protein
Carubv10011138m.g	-6.2012	3.32625e-07	AT1G18100	E12A11,MFT	PEBP (phosphatidylethanolamine-binding protein) family protein
Carubv10008683m.g	1.54864	0.0102093	AT1G18140	ATLAC1,LAC1	laccase 1
Carubv10008665m.g	-0.714477	0.00144697	AT1G18150	ATMPK8	Protein kinase superfamily protein
Carubv10012038m.g	-0.504766	0.0280167	AT1G18160	0	Protein kinase superfamily protein
Carubv10011718m.g	0.315266	0.427573	AT1G18170	0	FKBP-like peptidyl-prolyl cis-trans isomerase family protein
Carubv10011252m.g	-0.574631	0.00209368	AT1G18190	GC2	golgin candidate 2
Carubv10011865m.g	1.03103	0.618094	AT1G18200	AtRABA6b,RABA6b	RAB GTPase homolog A6B
Carubv10010474m.g	0.478397	0.131406	AT1G18210	0	Calcium-binding EF-hand family protein
Carubv10010135m.g	0.141867	0.840024	AT1G18250	ATLP-1	Pathogenesis-related thaumatin superfamily protein
Carubv10008501m.g	-0.170956	0.406206	AT1G18260	0	HCP-like superfamily protein
Carubv10011169m.g	-0.320475	0.743236	AT1G18265	0	Protein of unknown function, DUF593
Carubv10011390m.g	-1.01694	7.94872e-08	AT1G18270	0	ketose-bisphosphate aldolase class-II family protein
Carubv10012497m.g	-1.39173	0.37426	AT1G18280	0	Bifunctional inhibitor/lipid-transfer protein/seed storage 2S albumin superfamily protein
Carubv10010107m.g	0.0537316	NA	AT1G18290	0	0
Carubv10010316m.g	0.866244	0.351378	AT1G18300	atnudt4,NUDT4	nudix hydrolase homolog 4
Carubv10008525m.g	1.17703	0.498936	AT1G18310	0	glycosyl hydrolase family 81 protein
Carubv10010466m.g	1.72332	3.93446e-06	AT3G10110	MEE67	Mitochondrial import inner membrane translocase subunit Tim17/Tim22/Tim23 family protein
Carubv10009624m.g	-1.2087	0.00175896	AT1G18330	EPR1,RVE7	Homeodomain-like superfamily protein
Carubv10010010m.g	0.268377	0.357037	AT1G18335	0	Acyl-CoA N-acyltransferases (NAT) superfamily protein
Carubv10009867m.g	-1.55294	6.77623e-09	AT1G18340	0	basal transcription factor complex subunit-related
Carubv10011504m.g	0.0537316	NA	AT1G18350	ATMKK7,BUD1,MKK7	MAP kinase kinase 7
Carubv10009378m.g	-0.97173	0.000108279	AT1G18360	0	alpha/beta-Hydrolases superfamily protein
Carubv10008207m.g	-2.17851	3.36362e-05	AT1G18370	ATNACK1,HIK,NACK1	ATP binding microtubule motor family protein
Carubv10008544m.g	-1.1978	0.0070892	AT1G18390	0	Protein kinase superfamily protein
Carubv10009894m.g	-1.33415	NA	AT1G18400	BEE1	BR enhanced expression 1
Carubv10012358m.g	-1.07131	6.45614e-07	AT1G18410	0	P-loop containing nucleoside triphosphate hydrolases superfamily protein
Carubv10010911m.g	2.81433	9.58194e-05	AT1G77180	SKIP	chromatin protein family
Carubv10011098m.g	5.04082	7.62249e-23	AT1G18450	ARP4,ATARP4	actin-related protein 4
Carubv10010729m.g	-1.17834	5.82625e-07	0	0	0
Carubv10009940m.g	-0.212726	0.548405	AT1G18440	0	Peptidyl-tRNA hydrolase family protein
Carubv10009163m.g	0.039118	0.903263	AT1G18450	ARP4,ATARP4	actin-related protein 4
Carubv10008464m.g	-1.61217	0.0404686	AT1G18460	0	alpha/beta-Hydrolases superfamily protein
Carubv10009059m.g	-1.74995	9.87028e-07	AT1G18470	0	Transmembrane Fragile-X-F-associated protein
Carubv10010836m.g	0.0527611	NA	AT4G02655	0	0
Carubv10009776m.g	0.359351	0.371425	AT1G18490	0	Protein of unknown function (DUF1637)
Carubv10008887m.g	1.26168	2.18163e-09	AT1G18500	IPMS1,MAML-4	methylthioalkylmalate synthase-like 4
Carubv10011011m.g	-0.350241	NA	AT1G18510	TET16	tetraspanin 16
Carubv10011030m.g	-4.96219	1.10713e-05	AT1G18520	TET11	tetraspanin11
Carubv10011170m.g	-1.16492	NA	AT1G18530	0	EF hand calcium-binding protein family
Carubv10010178m.g	0.848815	0.00023499	AT1G18540	0	Ribosomal protein L6 family protein
Carubv10008434m.g	-2.57018	4.5612e-07	AT1G18550	0	ATP binding microtubule motor family protein
Carubv10008481m.g	-0.783263	0.00155915	AT1G18560	0	BED zinc finger ;hAT family dimerisation domain
Carubv10009563m.g	0.0537316	NA	AT1G18570	AtMYB51,BW51A,BW51B,HIG1,MYB51	myb domain protein 51
Carubv10008800m.g	-1.79006	7.54113e-17	AT1G18580	GAUT11	galacturonosyltransferase 11
Carubv10012097m.g	-1.55182	0.00180916	AT1G18590	ATSOT17,ATST5C,SOT17	sulfotransferase 17
Carubv10009672m.g	-0.772264	0.000509304	AT1G18600	ATRBL12,RBL12	RHOMBOID-like protein 12
Carubv10008756m.g	-0.322916	0.260428	AT1G18610	0	Galactose oxidase/kelch repeat superfamily protein
Carubv10008208m.g	1.74617	2.49415e-15	AT1G18620	0	0
Carubv10010958m.g	-0.343249	0.19834	AT1G18640	PSP	3-phosphoserine phosphatase
Carubv10012483m.g	0.995719	0.00104237	AT1G18650	PDCB3	plasmodesmata callose-binding protein 3
Carubv10008983m.g	-0.313158	0.241181	AT1G18660	0	zinc finger (C3HC4-type RING finger) family protein
Carubv10008466m.g	1.12982	5.36408e-05	AT1G18670	IBS1	Protein kinase superfamily protein
Carubv10010393m.g	-0.571011	0.12431	AT1G18680	0	HNH endonuclease domain-containing protein
Carubv10009116m.g	-0.127087	0.838105	AT1G18690	0	Galactosyl transferase GMA12/MNN10 family protein
Carubv10012083m.g	0.281523	0.112461	AT1G18700	0	DNAJ heat shock N-terminal domain-containing protein
Carubv10011014m.g	0.45924	NA	AT1G18710	AtMYB47,MYB47	myb domain protein 47
Carubv10010045m.g	1.393	NA	AT1G18710	AtMYB47,MYB47	myb domain protein 47
Carubv10010086m.g	0.129277	NA	AT1G18710	AtMYB47,MYB47	myb domain protein 47
Carubv10010309m.g	-0.929544	0.000135219	AT1G18720	0	Protein of unknown function (DUF962)
Carubv10010440m.g	-1.69806	0.143829	AT1G18730	NDF6	NDH dependent flow 6
Carubv10009431m.g	-0.879113	0.00305016	AT1G18740	0	Protein of unknown function (DUF793)
Carubv10009419m.g	1.97172	0.000772051	AT1G18750	AGL65	AGAMOUS-like 65
Carubv10010970m.g	0.0501739	NA	AT1G18760	0	Zinc finger, C3HC4 type (RING finger) family protein
Carubv10011027m.g	4.29207	5.30852e-05	AT1G18780	0	RING/U-box superfamily protein
Carubv10012572m.g	0.0537316	NA	AT3G13228	0	RING/U-box superfamily protein
Carubv10011133m.g	0.0526742	NA	AT1G18790	0	RWP-RK domain-containing protein
Carubv10010235m.g	0.659705	0.00812381	AT1G18800	NRP2	NAP1-related protein 2
Carubv10011880m.g	0.168752	NA	AT1G18810	0	phytochrome kinase substrate-related
Carubv10011773m.g	8.14979	2.15165e-17	AT1G18830	0	Transducin/WD40 repeat-like superfamily protein
Carubv10011804m.g	0.410204	NA	AT1G18835	MIF3	mini zinc finger
Carubv10008698m.g	-2.09663	6.73528e-21	AT1G18840	IQD30	IQ-domain 30
Carubv10009088m.g	0.746927	0.00177136	AT1G18850	0	0
Carubv10008977m.g	1.12155	NA	AT1G18860	ATWRKY61,WRKY61	WRKY DNA-binding protein 61
Carubv10008717m.g	2.67019	6.1311e-05	AT1G18870	ATICS2,ICS2	isochorismate synthase 2
Carubv10012216m.g	-2.78942	5.89516e-26	AT1G18880	0	Major facilitator superfamily protein
Carubv10008777m.g	-0.348997	0.0696656	AT1G18890	ATCDPK1,CDPK1,CPK10	calcium-dependent protein kinase 1
Carubv10008274m.g	0.0537316	NA	AT1G18900	0	Pentatricopeptide repeat (PPR) superfamily protein
Carubv10008101m.g	-0.833347	0.0593276	AT1G18910	0	zinc ion binding;zinc ion binding
Carubv10008700m.g	1.09553	0.0443217	AT1G18940	0	Nodulin-like / Major Facilitator Superfamily protein
Carubv10012346m.g	-0.379687	0.0723839	AT1G18950	0	DDT domain superfamily
Carubv10012671m.g	-1.32029	NA	AT1G18960	0	myb-like HTH transcriptional regulator family protein
Carubv10011931m.g	0.45924	NA	AT1G18970	GLP4	germin-like protein 4
Carubv10011952m.g	0.0508755	NA	AT1G18980	0	RmlC-like cupins superfamily protein
Carubv10011395m.g	-1.51811	0.08343	AT1G18990	0	Protein of unknown function, DUF593
Carubv10011841m.g	0.587463	0.0417382	AT1G19000	0	Homeodomain-like superfamily protein
Carubv10009495m.g	0.981912	0.00673197	AT1G19010	0	0
Carubv10010768m.g	-0.582538	0.733656	AT1G19020	0	0
Carubv10008764m.g	-1.07324	0.00107931	AT1G19025	0	DNA repair metallo-beta-lactamase family protein
Carubv10010295m.g	-2.45659	3.93472e-11	AT1G19050	ARR7	response regulator 7
Carubv10009244m.g	2.2924	5.1007e-10	AT4G22280	0	F-box/RNI-like superfamily protein
Carubv10012064m.g	0.0527611	NA	AT1G19086	0	0
Carubv10008603m.g	-0.606092	0.106929	AT1G19090	CRK1,RKF2	receptor-like serine/threonine kinase 2
Carubv10008534m.g	0.990822	4.13207e-06	AT1G19100	0	Histidine kinase-, DNA gyrase B-, and HSP90-like ATPase family protein
Carubv10008355m.g	0.0116566	0.971698	AT1G19110	0	inter-alpha-trypsin inhibitor heavy chain-related
Carubv10012380m.g	-1.56574	NA	AT1G19115	0	0
Carubv10010639m.g	-0.950995	NA	AT1G19120	0	Small nuclear ribonucleoprotein family protein
Carubv10010381m.g	0.112162	NA	AT1G19130	0	0
Carubv10009536m.g	0.900874	0.00385389	AT1G19140	0	0
Carubv10012387m.g	-1.36163	0.0947547	AT1G19150	LHCA2*1,LHCA6	photosystem I light harvesting complex gene 6
Carubv10011469m.g	-0.49174	0.0729888	AT1G19170	0	Pectin lyase-like superfamily protein
Carubv10010018m.g	-3.03228	4.15768e-12	AT1G19180	JAZ1,TIFY10A	jasmonate-zim-domain protein 1
Carubv10011394m.g	0.843167	0.629156	AT1G19210	0	Integrase-type DNA-binding superfamily protein
Carubv10008159m.g	1.91771	1.31942e-07	AT1G19220	ARF11,ARF19,IAA22	auxin response factor 19
Carubv10008247m.g	-5.00911	7.35668e-07	AT1G19230	0	Riboflavin synthase-like superfamily protein
Carubv10010715m.g	1.33366	0.000559916	AT1G19240	0	0
Carubv10008834m.g	-1.88501	0.187229	AT1G19250	FMO1	flavin-dependent monooxygenase 1
Carubv10008814m.g	-0.238089	0.486721	AT1G74960	ATKAS2,FAB1,KAS2	fatty acid biosynthesis 1
Carubv10008839m.g	-0.167796	0.556917	AT1G19270	DA1	DA1
Carubv10008259m.g	0.902228	0.00161411	AT1G19290	0	Pentatricopeptide repeat (PPR) superfamily protein
Carubv10012618m.g	-1.00644	0.0259748	AT1G19300	ATGATL1,GATL1,GLZ1,PARVUS	Nucleotide-diphospho-sugar transferases superfamily protein
Carubv10010212m.g	-0.342283	0.317608	AT1G19310	0	RING/U-box superfamily protein
Carubv10012596m.g	-6.9251	6.11633e-12	AT1G19320	0	Pathogenesis-related thaumatin superfamily protein
Carubv10010116m.g	-0.471613	0.124926	AT1G19330	0	0
Carubv10009255m.g	-0.0851014	0.865116	AT1G19340	0	Methyltransferase MT-A70 family protein
Carubv10009520m.g	-2.15047	6.61447e-10	AT1G19350	BES1,BZR2	Brassinosteroid signalling positive regulator (BZR1) family protein
Carubv10011112m.g	0.0537316	NA	AT1G19360	0	Nucleotide-diphospho-sugar transferase family protein
Carubv10012465m.g	-0.600942	0.0289977	AT1G19370	0	0
Carubv10010542m.g	-0.503313	0.261946	AT1G19380	0	Protein of unknown function (DUF1195)
Carubv10011311m.g	0.0496759	NA	AT1G19390	0	Wall-associated kinase family protein
Carubv10009862m.g	0.0152232	0.972452	AT1G19400	0	Erythronate-4-phosphate dehydrogenase family protein
Carubv10008443m.g	-1.53136	3.10918e-12	AT1G19430	0	S-adenosyl-L-methionine-dependent methyltransferases superfamily protein
Carubv10011929m.g	-1.25988	1.79434e-06	AT1G19440	KCS4	3-ketoacyl-CoA synthase 4
Carubv10012080m.g	-3.26939	5.90677e-18	AT1G19450	0	Major facilitator superfamily protein
Carubv10011352m.g	-2.90569	0.0275454	AT1G19460	0	Galactose oxidase/kelch repeat superfamily protein
Carubv10009489m.g	-0.296564	0.2979	AT1G19480	0	DNA glycosylase superfamily protein
Carubv10010997m.g	0.366112	0.147801	AT1G19485	0	Transducin/WD40 repeat-like superfamily protein
Carubv10011417m.g	-0.574036	0.178456	AT1G19490	0	Basic-leucine zipper (bZIP) transcription factor family protein
Carubv10012246m.g	0.733266	0.68767	AT1G19500	0	0
Carubv10010724m.g	-2.7827	0.0701808	AT1G19510	ATRL5,RL5,RSM4	RAD-like 5
Carubv10008438m.g	0.285102	0.148889	AT1G19520	NFD5	pentatricopeptide (PPR) repeat-containing protein
Carubv10010689m.g	-1.79214	0.210947	AT1G19530	0	0
Carubv10012117m.g	0.0537316	NA	AT1G19540	0	NmrA-like negative transcriptional regulator family protein
Carubv10010286m.g	0.42313	0.135502	AT1G19570	ATDHAR1,DHAR1,DHAR5	dehydroascorbate reductase
Carubv10009987m.g	0.0729622	0.800836	AT1G19580	GAMMA CA1	gamma carbonic anhydrase 1
Carubv10009566m.g	0.543676	0.0760035	AT1G19600	0	pfkB-like carbohydrate kinase family protein
Carubv10010796m.g	-0.801614	0.67322	AT1G19610	LCR78,PDF1.4	Arabidopsis defensin-like protein
Carubv10009793m.g	2.36445	0.150145	AT1G19620	0	0
Carubv10009004m.g	1.55371	0.00933143	AT1G19630	CYP722A1	cytochrome P450, family 722, subfamily A, polypeptide 1
Carubv10009402m.g	-5.34151	1.62227e-126	AT1G19640	JMT	jasmonic acid carboxyl methyltransferase
Carubv10012422m.g	0.828502	0.0020545	AT1G19650	0	Sec14p-like phosphatidylinositol transfer family protein
Carubv10012529m.g	0.891279	0.00157346	AT1G19660	0	Wound-responsive family protein
Carubv10009755m.g	-3.4648	0.00222783	AT1G19670	ATCLH1,ATHCOR1,CLH1,CORI1	chlorophyllase 1
Carubv10009094m.g	0.340304	0.283973	AT1G19680	0	RING/U-box superfamily protein
Carubv10012174m.g	-0.611069	0.242534	AT1G19690	0	NAD(P)-binding Rossmann-fold superfamily protein
Carubv10008805m.g	-1.72234	3.95353e-18	AT1G19700	BEL10,BLH10	BEL1-like homeodomain 10
Carubv10011399m.g	0.0407159	0.881658	AT1G19710	0	UDP-Glycosyltransferase superfamily protein
Carubv10012347m.g	0.309391	0.463429	AT1G19720	0	Pentatricopeptide repeat (PPR-like) superfamily protein
Carubv10010677m.g	1.6889	8.28984e-09	AT1G19730	ATH4,ATTRX4	Thioredoxin superfamily protein
Carubv10009375m.g	0.967307	3.49412e-05	AT1G19770	ATPUP14,PUP14	purine permease 14
Carubv10009477m.g	-0.698767	NA	AT1G19770	ATPUP14,PUP14	purine permease 14
Carubv10009551m.g	3.00336	0.0396094	AT1G19790	SRS7	SHI-related sequence 7
Carubv10009585m.g	-0.469782	0.0727648	AT1G19800	TGD1	trigalactosyldiacylglycerol 1
Carubv10010680m.g	1.5954	0.0222291	AT1G19830	0	SAUR-like auxin-responsive protein family
Carubv10008199m.g	-0.294059	0.242707	AT1G19835	0	Plant protein of unknown function (DUF869)
Carubv10010532m.g	-0.152971	0.802273	AT1G19840	0	SAUR-like auxin-responsive protein family
Carubv10010721m.g	4.05885	0.000222416	AT3G21290	0	dentin sialophosphoprotein-related
Carubv10011118m.g	2.06512	0.212307	AT3G11800	0	0
Carubv10008258m.g	1.75703	2.35582e-18	AT1G19850	ARF5,IAA24,MP	Transcriptional factor B3 family protein / auxin-responsive factor AUX/IAA-related
Carubv10009292m.g	-0.618458	0.00337741	AT1G19860	0	Zinc finger C-x8-C-x5-C-x3-H type family protein
Carubv10008346m.g	-0.793442	8.34337e-05	AT1G19870	iqd32	IQ-domain 32
Carubv10011521m.g	-1.49282	7.60893e-09	AT1G19880	0	Regulator of chromosome condensation (RCC1) family protein
Carubv10010862m.g	-0.359737	0.86728	AT1G19890	ATMGH3,MGH3	male-gamete-specific histone H3
Carubv10012343m.g	-6.0199	4.20962e-14	AT1G19900	0	glyoxal oxidase-related protein
Carubv10010325m.g	-0.907715	0.000827786	AT1G19910	ATVHA-C2,AVA-2PE,AVA-P2	ATPase, F0/V0 complex, subunit C protein
Carubv10009002m.g	0.714882	0.0078372	AT1G19920	APS2,ASA1	Pseudouridine synthase/archaeosine transglycosylase-like family protein
Carubv10008868m.g	-4.30557	1.99002e-62	AT1G19940	AtGH9B5,GH9B5	glycosyl hydrolase 9B5
Carubv10009826m.g	-2.0143	1.76141e-21	AT1G19950	HVA22H	HVA22-like protein H (ATHVA22H)
Carubv10012472m.g	0.0537316	NA	AT1G75717	0	0
Carubv10010001m.g	-2.76883	3.73942e-16	AT1G19970	0	ER lumen protein retaining receptor family protein
Carubv10010151m.g	-0.995812	7.56756e-06	AT1G19980	0	cytomatrix protein-related
Carubv10009729m.g	-0.286406	0.19997	AT1G19990	0	0
Carubv10012477m.g	-0.705215	NA	AT5G48110	0	Terpenoid cyclases/Protein prenyltransferases superfamily protein
Carubv10009114m.g	-1.65021	0.108911	AT1G20010	TUB5	tubulin beta-5 chain
Carubv10011511m.g	-0.53381	0.0811762	AT1G20020	ATLFNR2,FNR2	ferredoxin-NADP(+)-oxidoreductase 2
Carubv10011588m.g	-1.0127	0.0126724	AT1G20030	0	Pathogenesis-related thaumatin superfamily protein
Carubv10010245m.g	-0.793037	0.0042851	AT1G20050	HYD1	C-8,7 sterol isomerase
Carubv10008857m.g	2.02593	3.67126e-05	AT5G26830	0	Threonyl-tRNA synthetase
Carubv10008283m.g	-0.688547	0.0985496	AT1G20060	0	ATP binding microtubule motor family protein
Carubv10010355m.g	-2.22879	7.59662e-05	AT1G20070	0	0
Carubv10011202m.g	-1.95088	0.244019	AT1G20080	ATSYTB,NTMC2T1.2,NTMC2TYPE1.2,SYT2,SYTB	Calcium-dependent lipid-binding (CaLB domain) family protein
Carubv10010350m.g	-1.20655	0.000773834	AT1G20090	ARAC4,ATRAC4,ATROP2,ROP2	RHO-related protein from plants 2
Carubv10009911m.g	0.406641	0.0447546	AT1G20100	0	0
Carubv10008630m.g	-0.159543	0.443318	AT1G20110	0	RING/FYVE/PHD zinc finger superfamily protein
Carubv10012178m.g	1.06147	NA	AT1G20120	0	GDSL-like Lipase/Acylhydrolase superfamily protein
Carubv10011073m.g	0.458701	NA	AT1G20130	0	GDSL-like Lipase/Acylhydrolase superfamily protein
Carubv10011033m.g	-0.207678	0.898863	AT1G20132	0	GDSL-like Lipase/Acylhydrolase superfamily protein
Carubv10012369m.g	1.62385	0.348432	AT1G20135	0	GDSL-like Lipase/Acylhydrolase family protein
Carubv10011271m.g	1.17692	NA	AT1G20150	0	Subtilisin-like serine endopeptidase family protein
Carubv10008367m.g	-0.451272	0.562522	AT1G20160	ATSBT5.2	Subtilisin-like serine endopeptidase family protein
Carubv10009395m.g	1.06107	NA	AT1G20180	0	Protein of unknown function (DUF677)
Carubv10010090m.g	-0.120005	0.869881	AT1G20190	ATEXP11,ATEXPA11,ATHEXP ALPHA 1.14,EXP11,EXPA11	expansin 11
Carubv10008972m.g	-0.15255	0.494419	AT1G20200	EMB2719,HAP15	PAM domain (PCI/PINT associated module) protein
Carubv10009820m.g	0.463734	0.0757416	AT1G20220	0	Alba DNA/RNA-binding protein
Carubv10010092m.g	0.463718	0.0322035	AT1G20225	0	Thioredoxin superfamily protein
Carubv10008385m.g	1.02209	0.0344873	AT1G20230	0	Pentatricopeptide repeat (PPR) superfamily protein
Carubv10012521m.g	2.41912	0.00162528	AT1G20940	0	F-box family protein
Carubv10008979m.g	-1.15607	1.73946e-10	AT1G20260	0	ATPase, V1 complex, subunit B protein
Carubv10009921m.g	0.730192	0.0505415	AT1G20270	0	2-oxoglutarate (2OG) and Fe(II)-dependent oxygenase superfamily protein
Carubv10011494m.g	0.908329	0.000448061	AT1G20300	0	Pentatricopeptide repeat (PPR) superfamily protein
Carubv10010139m.g	-0.186817	0.927625	AT1G20310	0	0
Carubv10012534m.g	-0.947157	NA	AT1G20320	0	Haloacid dehalogenase-like hydrolase (HAD) superfamily protein
Carubv10011566m.g	1.1838	1.77271e-07	AT1G20330	CVP1,FRL1,SMT2	sterol methyltransferase 2
Carubv10008779m.g	-0.742127	0.014319	AT1G18070	0	Translation elongation factor EF1A/initiation factor IF2gamma family protein
Carubv10012022m.g	0.276354	0.505597	AT1G20340	DRT112,PETE2	Cupredoxin superfamily protein
Carubv10010213m.g	4.32946	2.33465e-07	AT1G20350	ATTIM17-1,TIM17-1	translocase inner membrane subunit 17-1
Carubv10011862m.g	-3.56708	1.30266e-06	AT1G21860	sks7	SKU5 similar 7
Carubv10008701m.g	0.582499	0.0140657	AT1G20370	0	Pseudouridine synthase family protein
Carubv10008428m.g	-0.182563	0.66766	AT1G20380	0	Prolyl oligopeptidase family protein
Carubv10008914m.g	-0.209794	0.511266	AT1G20410	0	Pseudouridine synthase family protein
Carubv10011343m.g	0.719778	0.0299283	AT1G20430	0	0
Carubv10010040m.g	0.0948591	0.851444	AT1G20440	AtCOR47,COR47,RD17	cold-regulated 47
Carubv10010037m.g	-0.568762	0.242177	AT1G20450	ERD10,LTI29,LTI45	Dehydrin family protein
Carubv10010710m.g	-0.857443	0.00929726	AT1G20460	0	0
Carubv10011671m.g	0.0537316	NA	AT1G20470	0	SAUR-like auxin-responsive protein family
Carubv10008735m.g	0.0180127	0.966187	AT1G20480	0	AMP-dependent synthetase and ligase family protein
Carubv10008755m.g	-1.00968	8.83825e-06	AT1G20500	0	AMP-dependent synthetase and ligase family protein
Carubv10012648m.g	0.548943	NA	AT5G38120	4CL8	AMP-dependent synthetase and ligase family protein
Carubv10008763m.g	1.36646	4.6537e-10	AT1G20510	OPCL1	OPC-8:0 CoA ligase1
Carubv10012650m.g	0.0526742	NA	AT1G20520	0	Arabidopsis protein of unknown function (DUF241)
Carubv10008623m.g	-0.170265	0.816464	AT1G20530	0	Protein of unknown function (DUF630 and DUF632)
Carubv10009593m.g	-0.202251	0.468529	AT1G20540	0	Transducin/WD40 repeat-like superfamily protein
Carubv10008720m.g	0.701553	0.0390818	AT1G20550	0	O-fucosyltransferase family protein
Carubv10011463m.g	-0.75605	0.00337741	AT1G20560	AAE1	acyl activating enzyme 1
Carubv10011863m.g	0.809257	0.000212014	AT1G80260	emb1427	Spc97 / Spc98 family of spindle pole body (SBP) component
Carubv10010118m.g	-0.861778	0.000565425	AT1G20575	0	Nucleotide-diphospho-sugar transferases superfamily protein
Carubv10010633m.g	0.763151	0.00459801	AT1G20580	0	Small nuclear ribonucleoprotein family protein
Carubv10009205m.g	0.350553	0.327833	AT1G20610	CYCB2;3	Cyclin B2;3
Carubv10012481m.g	0.348775	0.302019	AT1G20620	ATCAT3,CAT3,SEN2	catalase 3
Carubv10012491m.g	-0.00563009	0.983217	AT1G20630	CAT1	catalase 1
Carubv10008300m.g	-0.785756	0.161023	AT1G20640	0	Plant regulator RWP-RK family protein
Carubv10011749m.g	-1.07539	0.363854	AT1G20650	0	Protein kinase superfamily protein
Carubv10008487m.g	-0.382764	0.109721	AT1G20670	0	DNA-binding bromodomain-containing protein
Carubv10010586m.g	-0.467556	0.0427101	AT1G20693	HMG BETA 1,HMGB2,NFD02,NFD2	high mobility group B2
Carubv10012681m.g	-0.715936	0.000608244	AT1G20696	HMGB3,NFD03,NFD3	high mobility group B3
Carubv10010349m.g	-1.40474	0.384698	AT1G20700	ATWOX14,WOX14	WUSCHEL related homeobox 14
Carubv10012447m.g	0.052138	NA	AT1G20700	ATWOX14,WOX14	WUSCHEL related homeobox 14
Carubv10008105m.g	0.549513	0.0389144	AT1G20720	0	RAD3-like DNA-binding helicase protein
Carubv10011496m.g	1.53015	0.000519434	AT1G20750	0	RAD3-like DNA-binding helicase protein
Carubv10008174m.g	-1.75345	1.57722e-26	AT1G20760	0	Calcium-binding EF hand family protein
Carubv10010125m.g	0.0537316	NA	AT1G20770	0	0
Carubv10008332m.g	-0.274522	0.413985	AT1G20780	ATPUB44,PUB44,SAUL1	senescence-associated E3 ubiquitin ligase 1
Carubv10011337m.g	0.0537316	NA	AT1G57580	0	F-box family protein
Carubv10012220m.g	2.42783	1.92682e-11	AT1G20800	0	F-box family protein
Carubv10010195m.g	-0.380515	0.384394	AT1G20810	0	FKBP-like peptidyl-prolyl cis-trans isomerase family protein
Carubv10010488m.g	-1.12069	0.0241316	AT1G20816	0	0
Carubv10010177m.g	-3.6352	5.26203e-20	AT1G20823	0	RING/U-box superfamily protein
Carubv10009608m.g	0.0537316	NA	AT1G20830	MCD1	multiple chloroplast division site 1
Carubv10008415m.g	-1.33357	0.293659	AT1G20840	TMT1	tonoplast monosaccharide transporter1
Carubv10009557m.g	-2.63048	2.36777e-07	AT1G20850	XCP2	xylem cysteine peptidase 2
Carubv10011524m.g	1.12892	NA	AT1G20860	PHT1;8	phosphate transporter 1;8
Carubv10009051m.g	-0.676766	0.0924697	AT1G20870	0	HSP20-like chaperones superfamily protein
Carubv10009992m.g	-1.94698	8.59857e-15	AT1G20880	0	RNA-binding (RRM/RBD/RNP motifs) family protein
Carubv10010341m.g	-1.09818	0.00183874	AT1G20890	0	0
Carubv10009773m.g	-1.94259	4.18805e-05	AT1G20900	AHL27,ESC,ORE7	Predicted AT-hook DNA-binding family protein
Carubv10009301m.g	0.227697	0.379216	AT1G20910	0	ARID/BRIGHT DNA-binding domain-containing protein
Carubv10008128m.g	-0.476101	0.0486615	AT1G20920	0	P-loop containing nucleoside triphosphate hydrolases superfamily protein
Carubv10012230m.g	1.17512	0.508458	AT1G20925	0	Auxin efflux carrier family protein
Carubv10009794m.g	0.471319	0.210927	AT1G20930	CDKB2;2	cyclin-dependent kinase B2;2
Carubv10008559m.g	-0.835182	0.00912425	AT1G20950	0	Phosphofructokinase family protein
Carubv10008066m.g	0.578418	0.00103075	AT1G20960	emb1507	U5 small nuclear ribonucleoprotein helicase, putative
Carubv10008095m.g	-0.522084	0.0047175	AT1G20970	0	0
Carubv10012577m.g	-1.82568	6.99197e-19	AT1G20980	ATSPL14,FBR6,SPL14,SPL1R2	squamosa promoter binding protein-like 14
Carubv10008169m.g	-0.811662	6.38179e-06	AT1G20980	ATSPL14,FBR6,SPL14,SPL1R2	squamosa promoter binding protein-like 14
Carubv10009771m.g	1.48065	0.392104	AT1G20990	0	Cysteine/Histidine-rich C1 domain family protein
Carubv10009696m.g	-1.81841	0.00325527	AT1G21000	0	PLATZ transcription factor family protein
Carubv10009886m.g	-6.16664	3.61767e-26	AT1G21010	0	0
Carubv10010083m.g	2.24025	0.0010277	AT1G21050	0	Protein of unknown function, DUF617
Carubv10012153m.g	0.650851	0.0327669	AT1G21060	0	Protein of unknown function, DUF547
Carubv10011090m.g	0.587415	0.0366662	AT1G21065	0	0
Carubv10009605m.g	-5.10892	6.87161e-93	AT1G21070	0	Nucleotide-sugar transporter family protein
Carubv10009386m.g	-0.571462	0.00746954	AT1G21080	0	DNAJ heat shock N-terminal domain-containing protein
Carubv10010147m.g	1.23008	0.000835424	AT1G21090	0	Cupredoxin superfamily protein
Carubv10011795m.g	0.0537316	NA	AT1G21100	0	O-methyltransferase family protein
Carubv10011296m.g	8.4646	9.41984e-07	AT1G20940	0	F-box family protein
Carubv10010334m.g	-0.343522	0.312461	AT1G21140	0	Vacuolar iron transporter (VIT) family protein
Carubv10011358m.g	0.713753	0.0210276	AT1G21150	0	Mitochondrial transcription termination factor family protein
Carubv10008185m.g	0.619196	0.0392985	AT1G21160	0	eukaryotic translation initiation factor 2 (eIF-2) family protein
Carubv10008149m.g	-0.422001	0.105591	AT1G21170	SEC5B	Exocyst complex component SEC5
Carubv10010645m.g	1.1294	5.23756e-05	AT1G21190	0	Small nuclear ribonucleoprotein family protein
Carubv10009151m.g	-1.37599	9.09591e-09	AT1G21200	0	sequence-specific DNA binding transcription factors
Carubv10011787m.g	0.0499567	NA	AT1G21210	WAK4	wall associated kinase 4
Carubv10008400m.g	-1.96094	0.268656	AT1G21230	WAK5	wall associated kinase 5
Carubv10008422m.g	0.0537316	NA	AT1G21230	WAK5	wall associated kinase 5
Carubv10008398m.g	0.0537316	NA	AT1G21230	WAK5	wall associated kinase 5
Carubv10011280m.g	-0.930699	NA	AT1G21270	WAK2	wall-associated kinase 2
Carubv10011820m.g	0.0537316	NA	AT1G30790	0	F-box and associated interaction domains-containing protein
Carubv10008425m.g	1.26027	0.416541	AT1G21270	WAK2	wall-associated kinase 2
Carubv10009850m.g	-0.489629	0.389562	AT1G21310	ATEXT3,EXT3,RSH	extensin 3
Carubv10010842m.g	0.45924	NA	AT1G21326	0	VQ motif-containing protein
Carubv10011367m.g	0.733128	NA	AT1G21327	0	0
Carubv10011507m.g	-0.32809	0.718439	AT1G21340	0	Dof-type zinc finger DNA-binding family protein
Carubv10012470m.g	0.168719	0.71697	AT1G21350	0	Thioredoxin superfamily protein
Carubv10010234m.g	0.0526742	NA	AT1G21360	GLTP2	glycolipid transfer protein 2
Carubv10011688m.g	-0.702589	0.00741637	AT1G21370	0	0
Carubv10011646m.g	-0.558982	0.0117701	AT1G21380	0	Target of Myb protein 1
Carubv10010005m.g	0.409642	0.434195	AT1G21390	emb2170	embryo defective 2170
Carubv10011318m.g	7.73401	5.4362e-05	AT1G21395	0	0
Carubv10009022m.g	0.965967	0.000397745	AT1G21400	0	Thiamin diphosphate-binding fold (THDP-binding) superfamily protein
[truncated: 24,524 more rows]

## Sheet: Cbp x Cg
Supplementary Table 1. Gene expression in all analyzed genotypes.
DESeq2 analysis of Cbp x Cg vs Cbp x Cbp.
Gene	log2FoldChange	padj	Ath ortholog	Ath annotations	Ath annotations
Carubv10010485m.g	-0.0149485	0.973106	AT1G02140	HAP1,MAGO,MEE63	mago nashi family protein
Carubv10011809m.g	-0.195692	0.53074	AT1G02145	ALG12,EBS4	homolog of asparagine-linked glycosylation 12
Carubv10011354m.g	-0.310048	0.330091	AT1G02150	0	Tetratricopeptide repeat (TPR)-like superfamily protein
Carubv10011359m.g	0.0875362	0.873397	AT1G02160	0	Cox19 family protein (CHCH motif)
Carubv10011418m.g	0.372327	0.243927	AT1G02170	AMC1,ATMC1,ATMCPB1,LOL3,MCP1B	metacaspase 1
Carubv10008574m.g	4.07774	2.43591e-09	AT1G02190	0	Fatty acid hydroxylase superfamily
Carubv10008547m.g	-0.52462	0.835946	AT1G02205	CER1	Fatty acid hydroxylase superfamily
Carubv10010169m.g	0.0802588	0.856515	AT1G02130	ARA-5,ARA5,ATRAB1B,ATRABD2A,RA-5,RABD2A	RAS 5
Carubv10008556m.g	-0.237325	0.491135	AT1G02120	VAD1	GRAM domain family protein
Carubv10008455m.g	-0.787241	0.0215633	AT1G02110	0	Protein of unknown function (DUF630 and DUF632)
Carubv10009548m.g	-0.274535	0.438179	AT1G02100	0	Leucine carboxyl methyltransferase
Carubv10009724m.g	0.711705	0.0251524	AT1G02090	ATCSN7,COP15,CSN7,FUS5	Proteasome component (PCI) domain protein
Carubv10009759m.g	1.32711	0.00639249	AT2G35680	0	Phosphotyrosine protein phosphatases superfamily protein
Carubv10012145m.g	0.102249	0.758583	AT1G02080	0	transcription regulators
Carubv10011621m.g	0.316545	0.784579	AT1G02070	0	0
Carubv10009506m.g	0.410836	0.7149	AT1G02065	SPL8	squamosa promoter binding protein-like 8
Carubv10011958m.g	0.710039	0.0830244	AT1G02060	0	Tetratricopeptide repeat (TPR)-like superfamily protein
Carubv10011272m.g	-0.293742	0.599255	AT1G02040	0	C2H2-type zinc finger family protein
Carubv10008571m.g	0.183991	0.727692	AT1G02020	0	nitroreductase family protein
Carubv10008507m.g	-0.220679	0.505439	AT1G02010	SEC1A	secretory 1A
Carubv10011557m.g	0.0919969	0.867705	AT1G01990	0	0
Carubv10011221m.g	0.341387	0.784408	AT1G01980	ATSEC1A,SEC1A	FAD-binding Berberine family protein
Carubv10009324m.g	-0.392732	0.249251	AT1G01970	0	Tetratricopeptide repeat (TPR)-like superfamily protein
Carubv10008079m.g	-0.42931	0.204813	AT1G01960	EDA10	SEC7-like guanine nucleotide exchange family protein
Carubv10008265m.g	-0.748102	0.00475647	AT1G01950	ARK2	armadillo repeat kinesin 2
Carubv10012351m.g	0.319943	0.36132	AT1G01940	0	Cyclophilin-like peptidyl-prolyl cis-trans isomerase family protein
Carubv10008663m.g	0.348328	0.434245	AT1G01930	0	zinc finger protein-related
Carubv10008771m.g	0.00386349	0.994222	AT1G01920	0	SET domain-containing protein
Carubv10009581m.g	-0.0431569	0.919236	AT1G01910	0	P-loop containing nucleoside triphosphate hydrolases superfamily protein
Carubv10008379m.g	-2.30867	0.0100648	AT1G01900	ATSBT1.1,SBTI1.1	subtilase family protein
Carubv10011785m.g	-0.230053	0.546063	AT1G01880	0	5\'-3\' exonuclease family protein
Carubv10009683m.g	-0.330329	0.42585	AT1G01860	PFC1	Ribosomal RNA adenine dimethylase family protein
Carubv10011703m.g	0.167261	NA	AT1G01840	0	0
Carubv10008707m.g	-0.129127	0.770419	AT1G01830	0	ARM repeat superfamily protein
Carubv10012511m.g	1.94452	2.70402e-05	AT1G01810	0	0
Carubv10011770m.g	-1.1655	0.000102074	AT1G01790	ATKEA1,KEA1	K+ efflux antiporter 1
Carubv10010886m.g	-0.482767	0.140953	AT1G01780	0	GATA type zinc finger transcription factor family protein
Carubv10012179m.g	-0.742172	0.00881429	AT1G01770	0	0
Carubv10011834m.g	-0.0050836	0.994139	AT1G01760	0	adenosine deaminases;RNA binding;RNA binding;adenosine deaminases
Carubv10011760m.g	-0.248373	0.756311	AT1G01750	ADF11	actin depolymerizing factor 11
Carubv10012619m.g	0.167261	NA	AT1G01740	0	Protein kinase protein with tetratricopeptide repeat domain
Carubv10010200m.g	0.0152591	0.974915	AT1G01730	0	0
Carubv10009926m.g	0.863297	0.0118595	AT1G01720	ANAC002,ATAF1	NAC (No Apical Meristem) domain transcriptional regulator superfamily protein
Carubv10009215m.g	0.0814878	0.852484	AT1G01710	0	Acyl-CoA thioesterase family protein
Carubv10010705m.g	-0.23675	NA	AT4G00480	ATMYC1,myc1	basic helix-loop-helix (bHLH) DNA-binding superfamily protein
Carubv10011721m.g	-3.33165	0.000139433	AT1G01700	ATROPGEF2,ROPGEF2	RHO guanyl-nucleotide exchange factor 2
Carubv10009199m.g	1.39698	0.000583314	AT1G01695	0	Phosphatidylinositol N-acetyglucosaminlytransferase subunit P-related
Carubv10009137m.g	-1.04226	0.00592612	AT1G01690	ATPRD3,PRD3	putative recombination initiation defects 3
Carubv10009781m.g	0.783241	0.216599	AT1G01680	ATPUB54,PUB54	plant U-box 54
Carubv10009194m.g	-0.66845	0.23816	AT1G01670	0	RING/U-box superfamily protein
Carubv10008712m.g	0.692125	0.634964	AT1G01660	0	RING/U-box superfamily protein
Carubv10008675m.g	0.340832	0.327647	AT1G01650	ATSPPL4,SPPL4	SIGNAL PEPTIDE PEPTIDASE-LIKE 4
Carubv10012544m.g	0.167261	NA	AT1G01640	0	BTB/POZ domain-containing protein
Carubv10010070m.g	0.232645	0.59964	AT1G01630	0	Sec14p-like phosphatidylinositol transfer family protein
Carubv10009929m.g	-1.53572	1.31634e-06	AT1G01620	PIP1;3,PIP1C,TMP-B	plasma membrane intrinsic protein 1C
Carubv10008926m.g	1.57103	3.20465e-05	AT1G01610	ATGPAT4,GPAT4	glycerol-3-phosphate acyltransferase 4
Carubv10011916m.g	-0.853788	0.173177	AT1G03000	PEX6	peroxin 6
Carubv10010662m.g	0.889253	0.126786	AT1G01600	CYP86A4	cytochrome P450, family 86, subfamily A, polypeptide 4
Carubv10011562m.g	0.18872	0.773041	AT1G01600	CYP86A4	cytochrome P450, family 86, subfamily A, polypeptide 4
Carubv10008441m.g	-0.751655	0.517986	AT1G01580	ATFRO2,FRD1,FRO2	ferric reduction oxidase 2
Carubv10008901m.g	3.0764	5.23224e-05	AT1G01570	0	Protein of unknown function (DUF604)
Carubv10009488m.g	0.690712	0.648959	AT1G01560	ATMPK11,MPK11	MAP kinase 11
Carubv10009625m.g	0.14396	0.641919	AT1G01550	BPS1	Protein of unknown function (DUF793)
Carubv10011595m.g	-0.834197	0.00399273	AT1G01540	0	Protein kinase superfamily protein
Carubv10010156m.g	4.61621	6.46551e-62	AT1G01530	AGL28	AGAMOUS-like 28
Carubv10011679m.g	0.935576	0.0698759	AT1G01520	0	Homeodomain-like superfamily protein
Carubv10011468m.g	-0.232689	0.463629	AT1G01510	AN	NAD(P)-binding Rossmann-fold superfamily protein
Carubv10009744m.g	1.36982	4.08293e-07	AT1G01500	0	Erythronate-4-phosphate dehydrogenase family protein
Carubv10009396m.g	0.57468	0.749805	AT1G01480	ACS2,AT-ACC2	1-amino-cyclopropane-1-carboxylate synthase 2
Carubv10010557m.g	-0.192328	0.758305	AT1G01470	LEA14,LSR3	Late embryogenesis abundant protein
Carubv10009221m.g	0.155352	0.935856	AT1G01460	ATPIPK11,PIPK11	Phosphatidylinositol-4-phosphate 5-kinase, core
Carubv10010006m.g	3.1779	0.00707251	AT1G01453	0	0
Carubv10010980m.g	-0.165306	0.769399	AT1G01450	0	Protein kinase superfamily protein
Carubv10008546m.g	0.323545	0.317221	AT1G01440	0	Protein of unknown function (DUF3133)
Carubv10009105m.g	-1.54436	5.10279e-05	AT1G01430	TBL25	TRICHOME BIREFRINGENCE-LIKE 25
Carubv10011054m.g	0.188637	0.944711	AT1G01390	0	UDP-Glycosyltransferase superfamily protein
Carubv10011382m.g	-0.175103	0.904538	AT1G01380	ETC1	Homeodomain-like superfamily protein
Carubv10010436m.g	-0.576671	0.297913	AT1G01370	CENH3,HTR12	Histone superfamily protein
Carubv10010391m.g	-0.224722	0.638739	AT1G01360	PYL9,RCAR1	regulatory component of ABA receptor 1
Carubv10009639m.g	0.416955	0.187318	AT1G01350	0	Zinc finger (CCCH-type/C3HC4-type RING finger) family protein
Carubv10008437m.g	0.427387	0.746388	AT1G01340	ACBK1,ATCNGC10,CNGC10	cyclic nucleotide gated channel 10
Carubv10011109m.g	-1.44861	5.22104e-09	AT1G01320	0	Tetratricopeptide repeat (TPR)-like superfamily protein
Carubv10012656m.g	0.795005	0.37925	AT1G01310	0	CAP (Cysteine-rich secretory proteins, Antigen 5, and Pathogenesis-related 1 protein) superfamily protein
Carubv10009005m.g	-0.0401443	0.955587	AT1G01300	0	Eukaryotic aspartyl protease family protein
Carubv10009994m.g	-0.0391239	0.95108	AT1G01290	CNX3	cofactor of nitrate reductase and xanthine dehydrogenase 3
Carubv10011315m.g	0.186306	NA	AT1G01280	CYP703,CYP703A2	cytochrome P450, family 703, subfamily A, polypeptide 2
Carubv10008640m.g	-0.992758	4.97115e-05	AT1G01260	0	basic helix-loop-helix (bHLH) DNA-binding superfamily protein
Carubv10010347m.g	-1.88006	0.00649274	AT1G01250	0	Integrase-type DNA-binding superfamily protein
Carubv10009708m.g	-0.417566	0.448405	AT1G01240	0	0
Carubv10010529m.g	0.0039205	0.996189	AT1G01230	0	ORMDL family protein
Carubv10010395m.g	0.334361	0.811303	AT1G01225	0	NC domain-containing protein-related
Carubv10010167m.g	0.231369	0.754654	AT1G01200	ATRAB-A3,ATRABA3,RABA3	RAB GTPase homolog A3
Carubv10008749m.g	-1.60042	0.385078	AT1G01190	CYP78A8	cytochrome P450, family 78, subfamily A, polypeptide 8
Carubv10009834m.g	0.449569	0.724433	AT1G01180	0	S-adenosyl-L-methionine-dependent methyltransferases superfamily protein
Carubv10010775m.g	0.670787	0.671876	AT1G01170	0	Protein of unknown function (DUF1138)
Carubv10010354m.g	0.397503	NA	AT1G01160	GIF2	GRF1-interacting factor 2
Carubv10009814m.g	-1.06583	0.467945	AT1G01150	0	Homeodomain-like protein with RING/FYVE/PHD-type zinc finger domain
Carubv10009130m.g	-1.10882	0.00105921	AT1G01140	CIPK9,PKS6,SnRK3.12	CBL-interacting protein kinase 9
Carubv10012263m.g	-0.563496	0.260222	AT1G01120	KCS1	3-ketoacyl-CoA synthase 1
Carubv10008796m.g	-1.26781	0.0137909	AT1G01110	IQD18	IQ-domain 18
Carubv10010699m.g	-0.0225985	0.962396	AT4G00810	0	60S acidic ribosomal protein family
Carubv10009201m.g	-1.36649	3.03577e-07	AT1G01090	PDH-E1 ALPHA	pyruvate dehydrogenase E1 alpha
Carubv10009913m.g	-1.30496	3.92432e-05	AT1G01080	0	RNA-binding (RRM/RBD/RNP motifs) family protein
Carubv10009303m.g	0.683121	NA	AT1G01070	0	nodulin MtN21 /EamA-like transporter family protein
Carubv10008551m.g	-0.670131	0.369267	AT1G01060	LHY,LHY1	Homeodomain-like superfamily protein
Carubv10010288m.g	0.167261	NA	AT1G01050	AtPPa1,PPa1	pyrophosphorylase 1
Carubv10008073m.g	-0.0136996	0.97689	AT1G01040	ASU1,ATDCL1,CAF,DCL1,EMB60,EMB76,SIN1,SUS1	dicer-like 1
Carubv10009540m.g	-0.982641	0.500082	AT1G01030	NGA3	AP2/B3-like transcriptional factor family protein
Carubv10011984m.g	0.167261	NA	AT1G01020	ARV1	Arv1-like protein
Carubv10009451m.g	-0.000351494	0.999793	AT1G01010	ANAC001,NAC001	NAC domain containing protein 1
Carubv10009049m.g	0.0742913	0.913235	AT1G01010	ANAC001,NAC001	NAC domain containing protein 1
Carubv10011623m.g	0.172827	NA	AT3G04430	anac049,NAC049	NAC domain containing protein 49
Carubv10009390m.g	0.693288	0.506365	AT1G02220	ANAC003,NAC003	NAC domain containing protein 3
Carubv10009727m.g	0.208755	NA	AT1G02250	anac005,NAC005	NAC domain containing protein 5
Carubv10008913m.g	-0.019965	0.975851	AT1G02260	0	Divalent ion symporter
Carubv10008987m.g	-0.00646115	0.990023	AT1G02270	0	Calcium-binding endonuclease/exonuclease/phosphatase family
Carubv10011793m.g	0.189741	NA	AT2G41610	0	0
Carubv10009713m.g	1.70761	0.00209229	AT3G62850	0	zinc finger protein-related
Carubv10010930m.g	-0.518573	0.0351114	AT1G02280	ATTOC33,PPI1,TOC33	translocon at the outer envelope membrane of chloroplasts 33
Carubv10012070m.g	-0.0501759	0.917242	AT1G02290	0	0
Carubv10009537m.g	-0.403175	0.307109	AT1G02305	0	Cysteine proteinases superfamily protein
Carubv10011405m.g	-0.959707	0.553832	AT1G02310	MAN1	Glycosyl hydrolase superfamily protein
Carubv10011322m.g	2.37465	0.0635145	AT4G01630	ATEXP17,ATEXPA17,ATHEXP ALPHA 1.13,EXPA17	expansin A17
Carubv10009977m.g	0.0879681	0.826515	AT1G02330	0	0
Carubv10010261m.g	0.240008	0.929447	AT1G02335	GL22	germin-like protein subfamily 2 member 2 precursor
Carubv10009652m.g	-0.688353	0.56641	AT1G02340	FBI1,HFR1,REP1,RSF1	basic helix-loop-helix (bHLH) DNA-binding superfamily protein
Carubv10010007m.g	-0.873833	0.679314	AT1G02360	0	Chitinase family protein
Carubv10008848m.g	-0.00783846	0.988954	AT1G02370	0	Tetratricopeptide repeat (TPR)-like superfamily protein
Carubv10010187m.g	-0.644749	0.285894	AT1G02380	0	0
Carubv10008716m.g	-1.42952	2.09583e-08	AT1G02390	ATGPAT2,GPAT2	glycerol-3-phosphate acyltransferase 2
Carubv10010711m.g	1.49623	0.0629822	0	0	0
Carubv10011406m.g	2.27935	0.00375131	AT1G06810	0	0
Carubv10009706m.g	2.27113	0.0898422	AT1G02400	ATGA2OX4,ATGA2OX6,DTA1,GA2OX6	gibberellin 2-oxidase 6
Carubv10009922m.g	0.136525	0.722341	AT1G02410	0	cytochrome c oxidase assembly protein CtaG / Cox11 family
Carubv10012086m.g	-0.282134	0.490331	AT1G02420	0	Pentatricopeptide repeat (PPR) superfamily protein
Carubv10011316m.g	-0.166607	0.810528	AT1G02440	ARFD1A,ATARFD1A	ADP-ribosylation factor D1A
Carubv10010607m.g	0.389762	NA	AT1G02450	NIMIN-1,NIMIN1	NIM1-interacting 1
Carubv10008847m.g	0.497661	0.635708	AT1G02460	0	Pectin lyase-like superfamily protein
Carubv10011810m.g	0.422001	0.76288	AT1G02470	0	Polyketide cyclase/dehydrase and lipid transport superfamily protein
Carubv10010960m.g	-0.160873	0.728186	AT1G02475	0	Polyketide cyclase/dehydrase and lipid transport superfamily protein
Carubv10009376m.g	0.138575	0.706637	AT1G02500	AtSAM1,MAT1,SAM-1,SAM1	S-adenosylmethionine synthetase 1
Carubv10011333m.g	-0.234645	NA	AT1G02510	ATKCO4,ATTPK4,KCO4,TPK4	Outward rectifying potassium channel protein
Carubv10008098m.g	0.176697	0.72264	AT1G02520	PGP11	P-glycoprotein 11
Carubv10011825m.g	0.170815	NA	AT1G02540	0	0
Carubv10011902m.g	-0.157389	NA	AT1G03490	ANAC006,NAC006	NAC domain containing protein 6
Carubv10011439m.g	0.628245	NA	AT1G02550	0	Plant invertase/pectin methylesterase inhibitor superfamily protein
Carubv10009892m.g	-0.3407	0.299298	AT1G02560	CLPP5,NCLPP1,NCLPP5	nuclear encoded CLP protease 5
Carubv10009964m.g	-0.348323	0.818565	AT1G02570	0	0
Carubv10012183m.g	3.71759	1.46369e-08	AT1G02580	EMB173,FIS1,MEA,SDG5	SET domain-containing protein
Carubv10010204m.g	-0.202085	0.840782	AT1G02610	0	RING/FYVE/PHD zinc finger superfamily protein
Carubv10010357m.g	-0.759148	0.0214774	AT4G02080	ASAR1,ATSAR2,ATSARA1C,SAR2	secretion-associated RAS super family 2
Carubv10008081m.g	0.033091	0.941282	AT3G08530	0	Clathrin, heavy chain
Carubv10009401m.g	0.18088	NA	AT1G02630	0	Nucleoside transporter family protein
Carubv10008371m.g	-0.452361	0.591109	AT1G02640	ATBXL2,BXL2	beta-xylosidase 2
Carubv10008788m.g	0.710975	0.265772	AT1G02650	0	Tetratricopeptide repeat (TPR)-like superfamily protein
Carubv10011093m.g	0.212454	0.628056	AT1G02660	0	alpha/beta-Hydrolases superfamily protein
Carubv10010712m.g	0.593779	0.577031	0	0	0
Carubv10011279m.g	0.893972	NA	0	0	0
Carubv10010486m.g	-0.289622	0.418287	AT1G02680	TAF13	TBP-associated factor 13
Carubv10010400m.g	0.0965546	0.94664	AT5G38700	0	0
Carubv10011230m.g	-0.544874	0.416646	AT5G61710	0	0
Carubv10008795m.g	-0.778424	0.00833265	AT1G02690	IMPA-6	importin alpha isoform 6
Carubv10010109m.g	-1.45454	0.0202349	AT1G02700	0	0
Carubv10009529m.g	-1.08789	0.259041	AT1G02720	GATL5	galacturonosyltransferase 5
Carubv10010155m.g	0.248125	0.776104	AT1G01355	0	Putative endonuclease or glycosyl hydrolase
Carubv10008123m.g	-2.64609	3.99889e-10	AT1G02730	ATCSLD5,CSLD5,SOS6	cellulose synthase-like D5
Carubv10009970m.g	0.135026	0.722024	AT1G02740	0	MRG family protein
Carubv10011158m.g	-0.6976	0.489207	AT1G03190	ATXPD,UVH6	RAD3-like DNA-binding helicase protein
Carubv10010253m.g	0.538766	0.123642	AT1G02750	0	Drought-responsive family protein
Carubv10010281m.g	-0.0134376	0.97988	AT1G02780	emb2386	Ribosomal protein L19e family protein
Carubv10012094m.g	0.24301	0.780132	AT1G02790	PGA4	polygalacturonase 4
Carubv10011914m.g	-0.53023	0.122984	AT1G02800	ATCEL2,CEL2	cellulase 2
Carubv10011654m.g	0.254583	0.806657	AT1G02810	0	Plant invertase/pectin methylesterase inhibitor superfamily
Carubv10012198m.g	0.0253911	NA	AT1G02813	0	Protein of unknown function, DUF538
Carubv10010322m.g	-0.642797	0.126872	AT1G02816	0	Protein of unknown function, DUF538
Carubv10010737m.g	1.9592	0.00934482	AT1G02820	0	Late embryogenesis abundant 3 (LEA3) family protein
Carubv10012583m.g	0.351869	NA	AT1G02830	0	Ribosomal L22e protein family
Carubv10011110m.g	-0.63408	0.186915	AT4G02425	0	0
Carubv10011968m.g	-0.27466	0.488174	AT1G02840	ATSRP34,SR1,SRP34	RNA-binding (RRM/RBD/RNP motifs) family protein
Carubv10008974m.g	-0.576071	0.48557	AT1G02850	BGLU11	beta glucosidase 11
Carubv10009650m.g	0.406168	0.27919	AT1G02860	BAH1,NLA	SPX (SYG1/Pho81/XPR1) domain-containing protein
Carubv10010371m.g	0.167261	NA	AT1G02870	0	0
Carubv10012039m.g	0.0737731	0.86819	AT4G20480	0	Putative endonuclease or glycosyl hydrolase
Carubv10011132m.g	-0.00853889	0.991404	AT4G20480	0	Putative endonuclease or glycosyl hydrolase
Carubv10012506m.g	0.563644	0.13329	AT1G02880	TPK1	thiamin pyrophosphokinase1
Carubv10008107m.g	0.408047	0.179945	AT1G02890	0	AAA-type ATPase family protein
Carubv10012118m.g	1.80927	0.171457	AT1G02900	ATRALF1,RALF1,RALFL1	rapid alkalinization factor 1
Carubv10009110m.g	-0.258597	0.47184	AT1G02910	LPA1	tetratricopeptide repeat (TPR)-containing protein
Carubv10010300m.g	1.15491	0.000467909	AT1G02930	ATGST1,ATGSTF3,ATGSTF6,ERD11,GST1,GSTF6	glutathione S-transferase 6
Carubv10012455m.g	0.460464	0.0284753	AT1G02930	ATGST1,ATGSTF3,ATGSTF6,ERD11,GST1,GSTF6	glutathione S-transferase 6
Carubv10012405m.g	-1.3728	0.00125951	AT1G02940	ATGSTF5,GSTF5	glutathione S-transferase (class phi) 5
Carubv10010097m.g	-1.3283	0.413581	AT1G02950	ATGSTF4,GST31,GSTF4	glutathione S-transferase F4
Carubv10012349m.g	-0.149614	0.718976	AT1G02960	0	0
Carubv10008963m.g	-0.833936	0.000764554	AT1G02970	ATWEE1,WEE1	WEE1 kinase homolog
Carubv10010979m.g	3.61841	4.36832e-31	AT1G02980	ATCUL2,CUL2	cullin 2
Carubv10008104m.g	-0.490052	0.0636303	AT1G02990	0	0
Carubv10011267m.g	-0.385788	0.201495	AT1G03000	PEX6	peroxin 6
Carubv10008601m.g	0.167261	NA	AT1G03010	0	Phototropic-responsive NPH3 family protein
Carubv10010921m.g	0.167261	NA	AT1G03020	0	Thioredoxin superfamily protein
Carubv10009873m.g	0.201231	0.805918	AT1G03030	0	P-loop containing nucleoside triphosphate hydrolases superfamily protein
Carubv10009831m.g	0.00616945	0.990023	AT1G03040	0	basic helix-loop-helix (bHLH) DNA-binding superfamily protein
Carubv10008628m.g	-0.231136	0.817836	AT1G03050	0	ENTH/ANTH/VHS superfamily protein
Carubv10010025m.g	1.72615	0.00011166	AT1G03055	0	0
Carubv10008059m.g	-0.404936	0.116761	AT1G03060	SPI	Beige/BEACH domain ;WD domain, G-beta repeat protein
Carubv10011301m.g	-1.2918	0.0915482	AT1G03070	0	Bax inhibitor-1 family protein
Carubv10008080m.g	-0.275574	0.40953	AT1G03080	0	kinase interacting (KIP1-like) family protein
Carubv10008397m.g	-0.179291	0.597001	AT1G03090	MCCA	methylcrotonyl-CoA carboxylase alpha chain, mitochondrial / 3-methylcrotonyl-CoA carboxylase 1 (MCCA)
Carubv10011829m.g	0.167261	NA	AT1G03100	0	Pentatricopeptide repeat (PPR) superfamily protein
Carubv10009228m.g	0.10123	0.789557	AT1G03110	0	Transducin/WD40 repeat-like superfamily protein
Carubv10010425m.g	-1.17149	0.00930544	AT1G03120	ATRAB28,RAB28	responsive to abscisic acid 28
Carubv10012376m.g	-1.62405	4.98514e-06	AT1G03130	PSAD-2	photosystem I subunit D-2
Carubv10011298m.g	-0.055769	0.908033	AT1G03140	0	splicing factor Prp18 family protein
Carubv10010452m.g	-0.105346	0.821587	AT1G03150	0	Acyl-CoA N-acyltransferases (NAT) superfamily protein
Carubv10008235m.g	-0.459686	0.140477	AT1G03160	FZL	FZO-like
Carubv10012407m.g	1.40644	0.248361	AT1G03170	0	Protein of unknown function (DUF3049)
Carubv10009697m.g	0.732032	0.098641	AT1G03180	0	0
Carubv10008351m.g	-0.021298	0.961734	AT1G03190	ATXPD,UVH6	RAD3-like DNA-binding helicase protein
Carubv10011636m.g	3.61546	1.29499e-20	AT1G03220	0	Eukaryotic aspartyl protease family protein
Carubv10009900m.g	-1.42608	7.86366e-05	AT1G03210	0	Phenazine biosynthesis PhzC/PhzF protein
Carubv10010119m.g	-0.313026	0.280111	AT1G03250	0	0
Carubv10009985m.g	0.164637	0.690323	AT1G03260	0	SNARE associated Golgi protein family
Carubv10008943m.g	-0.624444	0.104059	AT1G03270	0	CBS domain-containing protein with a domain of unknown function (DUF21)
Carubv10009067m.g	0.119443	0.767253	AT1G03280	0	Transcription factor TFIIE, alpha subunit
Carubv10008752m.g	0.462347	0.467681	AT1G03290	0	0
Carubv10012522m.g	0.167261	NA	AT1G03300	ATDUF1,DUF1	DOMAIN OF UNKNOWN FUNCTION 724 1
Carubv10012076m.g	-0.503583	0.0715183	AT1G03310	ATISA2,BE2,DBE1,ISA2	debranching enzyme 1
Carubv10012047m.g	0.172239	NA	AT1G03320	0	0
Carubv10010754m.g	0.222179	0.551331	AT1G03330	0	Small nuclear ribonucleoprotein family protein
Carubv10011433m.g	0.355478	0.740524	AT1G03340	0	0
Carubv10009649m.g	0.0702749	0.878676	AT4G02930	0	GTP binding Elongation factor Tu family protein
Carubv10009113m.g	-0.276683	0.256704	AT1G03350	0	BSD domain-containing protein
Carubv10009740m.g	0.369912	0.287319	AT1G03360	ATRRP4,RRP4	ribosomal RNA processing 4
Carubv10008257m.g	-0.522174	0.0412447	AT1G03365	0	RING/U-box superfamily protein
Carubv10008175m.g	-0.781603	0.0181483	AT1G03370	0	C2 calcium/lipid-binding and GRAM domain containing protein
Carubv10008219m.g	-0.841896	0.0100596	AT1G03380	ATATG18G,ATG18G	homolog of yeast autophagy 18 (ATG18) G
Carubv10011653m.g	0.617834	NA	AT1G03390	0	HXXXD-type acyl-transferase family protein
Carubv10012607m.g	1.13279	NA	AT1G03400	0	2-oxoglutarate (2OG) and Fe(II)-dependent oxygenase superfamily protein
Carubv10009046m.g	1.69095	0.112492	AT1G03400	0	2-oxoglutarate (2OG) and Fe(II)-dependent oxygenase superfamily protein
Carubv10010558m.g	-0.160473	0.698311	AT1G03430	AHP5	histidine-containing phosphotransfer factor 5
Carubv10009374m.g	0.169034	0.704542	AT1G03440	0	Leucine-rich repeat (LRR) family protein
Carubv10012319m.g	3.41396	8.58589e-12	AT1G03445	BSU1	Serine/threonine protein phosphatase family protein
Carubv10009093m.g	-1.38482	2.58899e-07	AT1G03457	0	RNA-binding (RRM/RBD/RNP motifs) family protein
Carubv10009825m.g	-2.81304	2.04967e-18	AT1G03470	0	Kinase interacting (KIP1-like) family protein
Carubv10009383m.g	-0.618982	0.0120373	AT1G03475	ATCPO-I,HEMF1,LIN2	Coproporphyrinogen III oxidase
Carubv10011348m.g	-0.949439	0.674476	AT2G43220	0	Cysteine/Histidine-rich C1 domain family protein
Carubv10012206m.g	1.2336	0.516298	AT1G03490	ANAC006,NAC006	NAC domain containing protein 6
Carubv10011372m.g	-0.159827	0.814506	AT1G03510	0	Tetratricopeptide repeat (TPR)-like superfamily protein
Carubv10009126m.g	-0.751482	0.0386426	AT1G03520	0	Core-2/I-branching beta-1,6-N-acetylglucosaminyltransferase family protein
Carubv10008331m.g	0.29728	0.482746	AT1G03530	ATNAF1,NAF1	nuclear assembly factor 1
Carubv10011274m.g	0.478119	0.34573	AT1G03540	0	Pentatricopeptide repeat (PPR-like) superfamily protein
Carubv10012530m.g	0.3073	0.708599	AT1G03550	0	Secretory carrier membrane protein (SCAMP) family protein
Carubv10008524m.g	-0.09368	0.819927	AT1G03560	0	Pentatricopeptide repeat (PPR-like) superfamily protein
Carubv10009068m.g	0.285367	0.473086	AT1G03590	0	Protein phosphatase 2C family protein
Carubv10010460m.g	-0.62437	0.171742	AT1G03600	PSB27	photosystem II family protein
Carubv10012401m.g	-0.205242	0.671889	AT1G03610	0	Protein of unknown function (DUF789)
Carubv10010027m.g	1.25789	0.139487	AT1G03620	0	ELMO/CED-12 family protein
Carubv10009346m.g	-1.27929	0.00012345	AT1G03630	POR C,PORC	protochlorophyllide oxidoreductase C
Carubv10010366m.g	0.0837106	0.939594	AT1G03650	0	Acyl-CoA N-acyltransferases (NAT) superfamily protein
Carubv10010537m.g	-0.589669	0.18722	AT1G03660	0	Ankyrin-repeat containing protein
Carubv10010421m.g	-0.464646	0.22685	AT1G03680	ATHM1,ATM1,THM1,TRX-M1	thioredoxin M-type 1
Carubv10009418m.g	-0.324491	0.304614	AT1G03687	0	DTW domain-containing protein
Carubv10012189m.g	0.167261	NA	AT1G03700	0	Uncharacterised protein family (UPF0497)
Carubv10011650m.g	0.236076	0.580905	AT1G03710	0	Cystatin/monellin superfamily protein
Carubv10010476m.g	-1.32524	0.0136932	AT1G03730	0	0
Carubv10008411m.g	0.294841	0.497302	AT1G03740	0	Protein kinase superfamily protein
Carubv10008286m.g	-0.343429	0.348771	AT1G03750	CHR9	switch 2
Carubv10011875m.g	0.341631	0.427213	AT1G03760	0	Prefoldin chaperone subunit family protein
Carubv10009016m.g	-1.42898	4.2946e-05	AT1G03770	ATRING1B,RING1B	RING 1B
Carubv10008388m.g	-1.475	1.54373e-05	AT1G03780	TPX2	targeting protein for XKLP2
Carubv10011207m.g	2.8285	0.0178602	AT1G03790	SOM	Zinc finger C-x8-C-x5-C-x3-H type family protein
Carubv10011371m.g	1.10263	0.00326917	AT1G03800	ATERF10,ERF10	ERF domain protein 10
Carubv10010570m.g	1.65238	3.30326e-05	AT1G03810	0	Nucleic acid-binding, OB-fold-like protein
Carubv10011357m.g	-0.566822	NA	AT1G03820	0	0
Carubv10008276m.g	-0.0316392	0.939776	AT1G03830	0	guanylate-binding family protein
Carubv10008897m.g	0.102378	0.896787	AT1G03840	MGP	C2H2 and C2HC zinc fingers superfamily protein
Carubv10010567m.g	1.25269	0.433211	AT1G03850	0	Glutaredoxin family protein
Carubv10009925m.g	0.210566	0.528768	AT1G03860	ATPHB2,PHB2	prohibitin 2
Carubv10011002m.g	0.277781	0.828166	AT1G03870	FLA9	FASCICLIN-like arabinoogalactan 9
Carubv10011751m.g	-0.752511	0.718293	AT1G03880	CRB,CRU2	cruciferin 2
Carubv10012169m.g	-0.987915	0.500038	AT1G03890	0	RmlC-like cupins superfamily protein
Carubv10009732m.g	-0.314059	0.445128	AT1G03900	ATNAP4,NAP4	non-intrinsic ABC protein 4
Carubv10009912m.g	0.158161	0.66707	AT1G03905	0	P-loop containing nucleoside triphosphate hydrolases superfamily protein
Carubv10008511m.g	-0.0258531	0.950613	AT1G03910	0	0
Carubv10008713m.g	-0.313452	NA	AT1G03920	0	Protein kinase family protein
Carubv10009684m.g	-0.386571	0.27919	AT1G03930	ADK1,CKL9ALPHA,CKL9BETA	dual specificity kinase 1
Carubv10011644m.g	-0.0668604	0.894612	AT1G03940	0	HXXXD-type acyl-transferase family protein
Carubv10010296m.g	0.964552	0.00232319	AT1G03950	VPS2.3	vacuolar protein sorting-associated protein 2.3
Carubv10009100m.g	-0.858562	0.0014586	AT1G03960	0	Calcium-binding EF hand family protein
Carubv10011573m.g	0.921381	0.00132488	AT1G03970	GBF4	G-box binding factor 4
Carubv10010963m.g	-0.23675	NA	AT1G03982	0	PAK-box/P21-Rho-binding family protein
Carubv10012453m.g	-0.131709	0.886393	AT1G03990	0	Long-chain fatty alcohol dehydrogenase family protein
Carubv10011762m.g	-0.0306042	0.961982	AT1G04000	0	0
Carubv10008666m.g	0.559129	0.0907102	AT1G04010	ATPSAT1,PSAT1	phospholipid sterol acyl transferase 1
Carubv10008319m.g	-0.496774	0.154012	AT1G04020	ATBARD1,BARD1,ROW1	breast cancer associated RING 1
Carubv10011017m.g	-1.3378	0.0164891	AT1G04030	0	0
Carubv10010000m.g	-0.465859	0.445045	AT1G04040	0	HAD superfamily, subfamily IIIB acid phosphatase
Carubv10008474m.g	-0.788234	0.0187995	AT1G04050	SDG13,SUVR1	homolog of SU(var)3-9 1
Carubv10012272m.g	0.656317	0.011474	AT1G04070	ATTOM22-I,TOM22-I	translocase of outer membrane 22-I
Carubv10010956m.g	0.047873	0.908612	AT1G04080	PRP39	Tetratricopeptide repeat (TPR)-like superfamily protein
Carubv10012003m.g	-0.37376	0.308105	AT1G04090	0	Plant protein of unknown function (DUF946)
Carubv10010148m.g	-0.268775	0.573546	AT1G04100	IAA10	indoleacetic acid-induced protein 10
Carubv10012040m.g	0.167261	NA	AT1G04110	SDD1	Subtilase family protein
Carubv10008087m.g	-0.170886	0.554449	AT1G04120	ABCC5,ATABCC5,ATMRP5,MRP5	multidrug resistance-associated protein 5
Carubv10011408m.g	0.105643	0.794307	AT1G04130	0	Tetratricopeptide repeat (TPR)-like superfamily protein
Carubv10011722m.g	-0.174582	0.634886	AT1G04140	0	Transducin family protein / WD-40 repeat family protein
Carubv10012494m.g	-1.89125	3.11164e-11	AT1G04150	0	C2 calcium/lipid-binding plant phosphoribosyltransferase family protein
Carubv10008089m.g	-0.98731	0.00123161	AT1G04160	ATXIB,XI-8,XI-B,XIB	myosin XI B
Carubv10008849m.g	-0.0657403	0.835148	AT1G04170	EIF2 GAMMA	eukaryotic translation initiation factor 2 gamma subunit
Carubv10009248m.g	0.997517	NA	AT1G04180	YUC9	YUCCA 9
Carubv10009715m.g	0.128335	0.68913	AT1G04190	0	Tetratricopeptide repeat (TPR)-like superfamily protein
Carubv10008423m.g	-0.0146578	0.974942	AT1G04200	0	0
Carubv10008166m.g	-0.330343	0.146693	AT1G04210	0	Leucine-rich repeat protein kinase family protein
Carubv10008867m.g	1.05728	0.36474	AT1G04220	KCS2	3-ketoacyl-CoA synthase 2
Carubv10010871m.g	-0.143174	0.6808	AT1G04230	0	Protein of unknown function (DUF2361)
Carubv10010367m.g	0.665011	0.715465	AT1G04240	IAA3,SHY2	AUX/IAA transcriptional regulator family protein
Carubv10010236m.g	-0.574292	0.352647	AT1G04250	AXR3,IAA17	AUX/IAA transcriptional regulator family protein
Carubv10011583m.g	-0.0476355	0.925647	AT1G04260	MPI7,MPIP7,PRA1.D	CAMV movement protein interacting protein 7
Carubv10010394m.g	-0.2168	0.532077	AT1G04270	RPS15	cytosolic ribosomal protein S15
Carubv10012550m.g	-0.159954	0.778901	AT1G04280	0	P-loop containing nucleoside triphosphate hydrolases superfamily protein
Carubv10010530m.g	-0.0527454	0.927426	AT1G04290	0	Thioesterase superfamily protein
Carubv10012200m.g	-0.30165	0.287515	AT1G04300	0	TRAF-like superfamily protein
Carubv10008561m.g	-0.648975	0.108241	AT1G04310	ERS2	ethylene response sensor 2
Carubv10010725m.g	-2.1221	0.0294178	AT1G04330	0	0
Carubv10010342m.g	0.101262	0.784408	AT1G04340	0	HR-like lesion-inducing protein-related
Carubv10012007m.g	0.771943	NA	AT1G04360	0	RING/U-box superfamily protein
Carubv10011057m.g	0.167261	NA	AT1G04370	ATERF14,ERF14	Ethylene-responsive element binding factor 14
Carubv10012463m.g	-2.15533	0.103855	AT1G04380	0	2-oxoglutarate (2OG) and Fe(II)-dependent oxygenase superfamily protein
Carubv10012499m.g	0.662765	0.0611634	AT1G04390	0	BTB/POZ domain-containing protein
Carubv10008610m.g	-0.152118	0.704005	AT1G04400	AT-PHH1,ATCRY2,CRY2,FHA,PHH1	cryptochrome 2
Carubv10009108m.g	-0.508703	0.200256	AT1G04420	0	NAD(P)-linked oxidoreductase superfamily protein
Carubv10011254m.g	0.103144	0.88357	AT1G04430	0	S-adenosyl-L-methionine-dependent methyltransferases superfamily protein
Carubv10012017m.g	0.214964	0.552414	AT1G04440	CKL13	casein kinase like 13
Carubv10011479m.g	4.57983	4.36823e-45	AT1G04445	0	C2H2-like zinc finger protein
Carubv10012323m.g	2.21709	1.24387e-05	AT1G04450	RIC3	ROP-interactive CRIB motif-containing protein 3
Carubv10012095m.g	-0.287504	0.730919	AT2G33450	0	Ribosomal L28 family
Carubv10010690m.g	-0.351987	0.608074	AT2G33450	0	Ribosomal L28 family
Carubv10012233m.g	0.0225158	0.989375	AT1G04470	0	Protein of unknown function (DUF810)
Carubv10012532m.g	0.107604	0.780208	AT1G04480	0	Ribosomal protein L14p/L23e family protein
Carubv10011182m.g	-0.388304	0.651652	AT1G04490	0	Protein of unknown function (DUF3527)
Carubv10009410m.g	-0.0513677	NA	AT1G04500	0	CCT motif family protein
Carubv10008852m.g	-0.126119	0.686859	AT1G04510	MAC3A	MOS4-associated complex 3A
Carubv10009823m.g	-0.77286	0.00220897	AT1G04520	PDLP2	plasmodesmata-located protein 2
Carubv10009880m.g	-1.59289	1.34534e-06	AT1G04530	0	Tetratricopeptide repeat (TPR)-like superfamily protein
Carubv10011922m.g	0.187454	0.926688	AT1G04540	0	Calcium-dependent lipid-binding (CaLB domain) family protein
Carubv10009764m.g	-0.522182	0.51614	AT1G04550	BDL,IAA12	AUX/IAA transcriptional regulator family protein
Carubv10010566m.g	1.69075	7.55501e-10	AT1G04555	0	0
Carubv10012389m.g	2.9884	0.116676	AT1G04560	0	AWPM-19-like family protein
Carubv10008801m.g	-0.229354	0.637664	AT1G04570	0	Major facilitator superfamily protein
Carubv10011163m.g	-1.3254	0.307689	AT1G04580	AAO4,AO4,ATAO-4,ATAO2	aldehyde oxidase 4
Carubv10009357m.g	0.107603	0.819927	AT1G04590	0	0
Carubv10012168m.g	0.054394	0.939036	AT1G04600	ATXIA,XIA	myosin XI A
Carubv10011757m.g	-0.520229	0.442394	AT1G04610	YUC3	YUCCA 3
Carubv10011940m.g	-0.865079	0.0058671	AT1G04620	0	coenzyme F420 hydrogenase family / dehydrogenase, beta subunit family
Carubv10010588m.g	-0.119845	0.784312	AT1G04630	MEE4	GRIM-19 protein
Carubv10010559m.g	0.225138	0.645798	AT1G04635	EMB1687	ribonuclease P family protein / Rpp14 family protein
Carubv10010053m.g	-0.54898	0.219099	AT1G04640	LIP2	lipoyltransferase 2
Carubv10011016m.g	2.06126	7.6455e-10	AT1G04645	0	Plant self-incompatibility protein S1 family
Carubv10008197m.g	0.414118	0.314904	AT1G04650	0	0
Carubv10012332m.g	-0.154098	NA	AT1G04670	0	0
Carubv10009197m.g	-2.11566	0.000720509	AT1G04680	0	Pectin lyase-like superfamily protein
Carubv10009717m.g	-1.14535	1.23282e-05	AT1G04690	KAB1,KV-BETA1	potassium channel beta subunit 1
Carubv10011648m.g	-0.485117	0.487695	AT1G04700	0	PB1 domain-containing protein tyrosine kinase
Carubv10008506m.g	0.212773	0.489939	AT1G50920	0	Nucleolar GTP-binding protein
Carubv10009140m.g	0.238028	0.625454	AT1G04710	KAT1,PKT4	peroxisomal 3-ketoacyl-CoA thiolase 4
Carubv10008278m.g	-0.203146	0.637774	AT1G04730	CTF18	P-loop containing nucleoside triphosphate hydrolases superfamily protein
Carubv10010251m.g	-0.098071	0.810048	AT1G04750	AT VAMP7B,ATVAMP721,VAMP721,VAMP7B	vesicle-associated membrane protein 721
Carubv10012187m.g	-2.59932	6.23939e-05	AT1G04760	ATVAMP726,VAMP726	vesicle-associated membrane protein 726
Carubv10009848m.g	0.88159	0.139071	AT1G04770	0	Tetratricopeptide repeat (TPR)-like superfamily protein
Carubv10008526m.g	-0.376671	0.162273	AT1G04780	0	Ankyrin repeat family protein
Carubv10008582m.g	0.25409	0.497052	AT1G04790	0	RING/U-box superfamily protein
Carubv10008193m.g	0.0986908	0.809317	AT1G04810	0	26S proteasome regulatory complex, non-ATPase subcomplex, Rpn2/Psmd1 subunit
Carubv10009123m.g	0.126426	0.762639	AT1G04830	0	Ypt/Rab-GAP domain of gyp1p superfamily protein
Carubv10010811m.g	0.691214	0.787377	0	0	0
Carubv10008505m.g	0.145186	0.873643	AT1G04840	0	Tetratricopeptide repeat (TPR)-like superfamily protein
Carubv10011080m.g	0.103842	0.80811	AT1G04850	0	ubiquitin-associated (UBA)/TS-N domain-containing protein
Carubv10008214m.g	-0.490277	0.0629379	AT1G04860	ATUBP2,UBP2	ubiquitin-specific protease 2
Carubv10009430m.g	-0.0380076	0.937997	AT1G04870	ATPRMT10,PRMT10	protein arginine methyltransferase 10
Carubv10010835m.g	4.25182	2.07467e-55	AT1G04880	0	HMG (high mobility group) box protein with ARID/BRIGHT DNA-binding domain
Carubv10011320m.g	0.632064	NA	AT1G04890	0	Protein of unknown function, DUF593
Carubv10011212m.g	0.530441	0.08142	AT1G04900	0	Protein of unknown function (DUF185)
Carubv10008864m.g	-0.196449	0.523063	AT1G04910	0	O-fucosyltransferase family protein
Carubv10008160m.g	-1.64592	1.61565e-06	AT1G04920	ATSPS3F,SPS3F	sucrose phosphate synthase 3F
Carubv10009801m.g	-0.33773	0.488603	AT1G04930	0	hydroxyproline-rich glycoprotein family protein
Carubv10011153m.g	-0.330616	0.302964	AT1G04945	0	HIT-type Zinc finger family protein
Carubv10008770m.g	-0.167918	0.609429	AT1G04950	ATTAF6,TAF6,TAFII59	TATA BOX ASSOCIATED FACTOR II 59
Carubv10012006m.g	0.225392	0.580696	AT1G04960	0	Protein of unknown function (DUF1664)
Carubv10008924m.g	-0.517694	0.0611479	AT1G04970	0	lipid-binding serum glycoprotein family protein
Carubv10012209m.g	0.954829	0.000511371	AT1G04980	ATPDI10,ATPDIL2-2,PDI10,PDIL2-2	PDI-like 2-2
Carubv10012011m.g	-0.232123	0.583908	AT1G04985	0	0
Carubv10009335m.g	0.612718	0.0790996	AT1G04990	0	Zinc finger C-x8-C-x5-C-x3-H type family protein
Carubv10009961m.g	0.259153	0.514667	AT1G05000	0	Phosphotyrosine protein phosphatases superfamily protein
Carubv10012579m.g	-1.99807	0.298547	AT1G43010	0	Pentatricopeptide repeat (PPR) superfamily protein
Carubv10009749m.g	-0.247619	0.67389	AT1G05010	ACO4,EAT1,EFE	ethylene-forming enzyme
Carubv10008537m.g	0.929017	0.246714	AT1G05020	0	ENTH/ANTH/VHS superfamily protein
Carubv10011812m.g	0.53734	NA	AT1G05040	0	0
Carubv10009246m.g	-0.179895	0.661836	AT1G05055	ATGTF2H2,GTF2H2	general transcription factor II H2
Carubv10011171m.g	1.64865	0.372697	AT5G40170	AtRLP54,RLP54	receptor like protein 54
Carubv10011495m.g	1.31567	NA	AT5G40170	AtRLP54,RLP54	receptor like protein 54
Carubv10010084m.g	0.3993	0.37925	AT1G05060	0	0
Carubv10009946m.g	0.844365	0.599637	AT2G32630	0	Pentatricopeptide repeat (PPR-like) superfamily protein
Carubv10010777m.g	0.2339	0.934365	AT1G05065	CLE20	CLAVATA3/ESR-RELATED 20
Carubv10010412m.g	0.0735592	0.889966	AT1G05070	0	Protein of unknown function (DUF1068)
Carubv10011452m.g	1.55289	NA	AT1G05080	0	F-box/RNI-like/FBD-like domains-containing protein
Carubv10009896m.g	0.0758421	0.895178	AT2G42460	0	TRAF-like family protein
Carubv10008492m.g	0.0340978	0.935119	AT4G20720	0	dentin sialophosphoprotein-related
Carubv10009674m.g	0.914285	0.450156	AT1G05100	MAPKKK18	mitogen-activated protein kinase kinase kinase 18
Carubv10008314m.g	0.237357	0.471913	AT1G05120	0	Helicase protein with RING/U-box domain
Carubv10011717m.g	-0.316329	0.426418	AT1G05140	0	Peptidase M50 family protein
Carubv10012243m.g	-1.18632	1.15122e-05	AT1G05150	0	Calcium-binding tetratricopeptide family protein
Carubv10008960m.g	0.714803	0.0072187	AT1G05160	ATKAO1,CYP88A3,KAO1	cytochrome P450, family 88, subfamily A, polypeptide 3
Carubv10009858m.g	-0.716113	0.157607	AT1G05170	0	Galactosyltransferase family protein
Carubv10008715m.g	0.179951	0.516203	AT1G05180	AXR1	NAD(P)-binding Rossmann-fold superfamily protein
Carubv10010237m.g	-1.07924	0.000312393	AT1G05190	emb2394	Ribosomal protein L6 family
Carubv10008205m.g	0.167261	NA	AT1G05200	ATGLR3.4,GLR3.4,GLUR3	glutamate receptor 3.4
Carubv10010747m.g	0.370927	0.384054	AT1G05205	0	0
Carubv10010479m.g	0.271568	0.659378	AT1G05210	0	Transmembrane protein 97, predicted
Carubv10008621m.g	1.4175	0.000353149	AT1G05230	HDG2	homeodomain GLABROUS 2
Carubv10012652m.g	0.173088	NA	AT1G05250	0	Peroxidase superfamily protein
Carubv10012469m.g	1.23415	NA	AT1G05250	0	Peroxidase superfamily protein
Carubv10010069m.g	0.34834	0.335704	AT1G07440	0	NAD(P)-binding Rossmann-fold superfamily protein
Carubv10011540m.g	4.79851	1.55728e-10	AT4G20480	0	Putative endonuclease or glycosyl hydrolase
Carubv10012082m.g	4.71122	6.83831e-10	AT4G20480	0	Putative endonuclease or glycosyl hydrolase
Carubv10009829m.g	-0.13215	0.754548	AT1G05260	RCI3,RCI3A	Peroxidase superfamily protein
Carubv10012564m.g	-0.675348	0.0391317	AT1G05270	0	TraB family protein
Carubv10012119m.g	-1.65166	0.139717	AT1G05280	0	Protein of unknown function (DUF604)
Carubv10011948m.g	0.625746	NA	AT1G05290	0	CCT motif family protein
Carubv10011853m.g	3.43371	8.15392e-16	AT1G05291	0	Protein of unknown function (DUF1218)
Carubv10009542m.g	-2.11039	6.14424e-09	AT1G05300	ZIP5	zinc transporter 5 precursor
Carubv10011085m.g	1.69104	0.261196	AT1G05310	0	Pectin lyase-like superfamily protein
Carubv10011474m.g	-0.250076	0.435267	AT1G05320	0	0
Carubv10012259m.g	0.167261	NA	AT1G05330	0	0
Carubv10010816m.g	0.352149	0.628398	AT2G32210	0	0
Carubv10010049m.g	1.05487	0.570914	AT3G18535	0	tubulin-tyrosine ligases
Carubv10011728m.g	0.223883	0.938122	AT3G01440	PQL1,PQL2	PsbQ-like 1
Carubv10008192m.g	-0.423827	0.602288	AT3G01460	ATMBD9,MBD9	methyl-CPG-binding domain 9
Carubv10009195m.g	-0.226005	0.527067	AT1G05350	0	NAD(P)-binding Rossmann-fold superfamily protein
Carubv10009268m.g	1.46423	1.96182e-09	AT1G05360	0	0
Carubv10009204m.g	-2.91972	1.13623e-07	AT1G05370	0	Sec14p-like phosphatidylinositol transfer family protein
Carubv10008137m.g	-0.314478	0.20214	AT1G05380	0	Acyl-CoA N-acyltransferase with RING/FYVE/PHD-type zinc finger protein
Carubv10011658m.g	0.167261	NA	AT1G05385	LPA19,Psb27-H1	photosystem II 11 kDa protein-related
Carubv10010861m.g	-1.31138	0.000958687	AT1G05420	ATOFP12,OFP12	ovate family protein 12
Carubv10009042m.g	-0.115181	0.760855	AT1G05410	0	Protein of unknown function (DUF1423)
Carubv10010009m.g	-0.18729	0.585209	AT1G05430	0	0
Carubv10012616m.g	-2.66759	1.48956e-07	AT1G05440	0	C-8 sterol isomerases
Carubv10010889m.g	2.18655	0.284692	AT1G05450	0	Bifunctional inhibitor/lipid-transfer protein/seed storage 2S albumin superfamily protein
Carubv10008170m.g	-0.763058	0.00101904	AT1G05460	SDE3	P-loop containing nucleoside triphosphate hydrolases superfamily protein
Carubv10008606m.g	-0.281077	0.336302	AT1G05470	CVP2	DNAse I-like superfamily protein
Carubv10008086m.g	0.0635283	0.873577	AT1G05490	chr31	chromatin remodeling 31
Carubv10011426m.g	0.167261	NA	0	0	0
Carubv10010976m.g	-0.504363	0.0786029	AT1G05500	ATSYTE,NTMC2T2.1,NTMC2TYPE2.1,SYT5,SYTE	Calcium-dependent lipid-binding (CaLB domain) family protein
Carubv10010839m.g	-1.32292	0.0325378	AT1G05510	0	Protein of unknown function (DUF1264)
Carubv10011838m.g	0.342852	0.218223	AT1G05520	0	Sec23/Sec24 protein transport family protein
Carubv10010859m.g	-0.377324	NA	AT1G05560	UGT1,UGT75B1	UDP-glucosyltransferase 75B1
Carubv10011245m.g	0.904612	0.0957706	AT1G05540	0	Protein of unknown function (DUF295)
Carubv10012442m.g	0.580821	0.753108	AT1G05550	0	Protein of unknown function (DUF295)
Carubv10009073m.g	-1.1392	0.254618	AT1G05560	UGT1,UGT75B1	UDP-glucosyltransferase 75B1
Carubv10012675m.g	0.0692398	0.861236	AT1G05570	ATGSL06,ATGSL6,CALS1,GSL06,GSL6	callose synthase 1
Carubv10010762m.g	1.47426	0.527487	AT1G05575	0	0
Carubv10011656m.g	-0.0479176	0.979662	AT1G05577	0	Domain of unknown function (DUF966)
Carubv10011346m.g	-0.205968	0.859904	AT1G05580	ATCHX23,CHX23	cation/H+ exchanger 23
Carubv10011603m.g	-0.0990213	0.849447	AT1G05590	ATHEX3,HEXO2	beta-hexosaminidase 2
Carubv10012229m.g	-0.666702	0.0710201	AT1G05600	0	Tetratricopeptide repeat (TPR)-like superfamily protein
Carubv10009001m.g	-0.408734	NA	AT1G05610	APS2	ADP-glucose pyrophosphorylase small subunit 2
Carubv10012044m.g	0.818262	NA	AT2G24670	0	Domain of unknown function (DUF313)
Carubv10009769m.g	0.54636	0.0714879	AT1G05620	URH2	uridine-ribohydrolase 2
Carubv10008138m.g	0.708623	0.0207692	AT1G05630	5PTASE13,AT5PTASE13	Endonuclease/exonuclease/phosphatase family protein
Carubv10008579m.g	0.167261	NA	AT1G05640	0	Ankyrin repeat family protein
Carubv10011292m.g	0.63235	0.823524	AT1G05650	0	Pectin lyase-like superfamily protein
Carubv10012375m.g	0.171278	NA	AT1G05660	0	Pectin lyase-like superfamily protein
Carubv10008426m.g	-0.153313	0.709231	AT1G05670	0	Pentatricopeptide repeat (PPR-like) superfamily protein
Carubv10011842m.g	1.05733	NA	AT1G05680	UGT74E2	Uridine diphosphate glycosyltransferase 74E2
Carubv10009096m.g	0.822511	0.628424	AT1G05680	UGT74E2	Uridine diphosphate glycosyltransferase 74E2
Carubv10009329m.g	-0.68363	0.319041	AT1G05690	BT3	BTB and TAZ domain protein 3
Carubv10011047m.g	-1.1171	0.409166	AT1G05700	0	Leucine-rich repeat transmembrane protein kinase protein
Carubv10010563m.g	-0.0652219	0.926757	AT1G05710	0	basic helix-loop-helix (bHLH) DNA-binding superfamily protein
Carubv10010380m.g	0.03692	0.942903	AT1G05720	0	selenoprotein family protein
Carubv10010564m.g	-0.00212974	0.997404	AT1G05730	0	Eukaryotic protein of unknown function (DUF842)
Carubv10011161m.g	0.167261	NA	AT1G05750	CLB19,PDE247	Tetratricopeptide repeat (TPR)-like superfamily protein
Carubv10010372m.g	-0.0878243	0.948513	AT1G05760	RTM1	Mannose-binding lectin superfamily protein
Carubv10010613m.g	0.316925	0.507313	AT1G05785	0	Got1/Sft2-like vescicle transport protein family
Carubv10011376m.g	0.578011	0.122711	AT1G05790	0	lipase class 3 family protein
Carubv10010888m.g	-0.630014	NA	AT1G05800	DGL	alpha/beta-Hydrolases superfamily protein
Carubv10009382m.g	0.34941	0.230541	AT1G05805	0	basic helix-loop-helix (bHLH) DNA-binding superfamily protein
Carubv10010263m.g	-0.136455	0.823524	AT1G05810	ARA,ARA-1,ATRAB11D,ATRABA5E,RABA5E	RAB GTPase homolog A5E
Carubv10008828m.g	0.733855	0.0626432	AT1G05820	ATSPPL5,SPPL5	SIGNAL PEPTIDE PEPTIDASE-LIKE 5
Carubv10008150m.g	-0.708637	0.00649234	AT1G05830	ATX2,SDG30	trithorax-like protein 2
Carubv10011930m.g	0.167261	NA	AT1G05835	0	PHD finger protein
Carubv10008865m.g	-0.488567	0.121483	AT1G05840	0	Eukaryotic aspartyl protease family protein
Carubv10009762m.g	-0.355351	0.330959	AT1G05850	ATCTL1,CTL1,ELP,ELP1,ERH2,HOT2,POM1	Chitinase family protein
Carubv10009960m.g	-0.229271	0.625841	AT1G05860	0	0
Carubv10010453m.g	-0.211503	0.69781	AT1G05870	0	Protein of unknown function (DUF1685)
Carubv10008969m.g	-0.0515174	NA	AT1G05880	ARI12,ATARI12	RING/U-box superfamily protein
Carubv10012456m.g	0.675373	0.0122583	AT1G05890	ARI5,ATARI5	RING/U-box superfamily protein
Carubv10011325m.g	-1.159	0.504565	AT1G05894	0	0
Carubv10012090m.g	-0.465238	0.16848	AT1G05900	ATNTH2,NTH2	endonuclease III 2
Carubv10008115m.g	-0.0440229	0.901066	AT1G05910	0	cell division cycle protein 48-related / CDC48-related
Carubv10011639m.g	0.903747	NA	AT1G05920	0	Domain of unknown function (DUF313)
Carubv10012589m.g	0.955945	NA	AT3G24850	0	Domain of unknown function (DUF313)
Carubv10008604m.g	0.307948	0.479002	AT1G05950	0	0
Carubv10008206m.g	0.0841383	0.82693	AT1G05960	0	ARM repeat superfamily protein
Carubv10010117m.g	-0.444292	0.29194	AT1G05970	0	RNA-binding (RRM/RBD/RNP motifs) family protein
Carubv10010897m.g	-0.408734	NA	AT1G05990	RHS1	EF hand calcium-binding protein family
Carubv10010720m.g	-0.126592	0.751255	AT1G06010	0	0
Carubv10012342m.g	3.95834	1.49399e-18	AT1G06030	0	pfkB-like carbohydrate kinase family protein
Carubv10010113m.g	-1.00756	7.42007e-07	AT1G06040	STO	B-box zinc finger family protein
Carubv10009838m.g	1.34443	8.63652e-08	AT1G06050	0	Protein of unknown function (DUF1336)
Carubv10009937m.g	0.167261	NA	AT1G06060	0	LisH and RanBPM domains containing protein
Carubv10008993m.g	0.515455	0.567645	AT1G06070	0	Basic-leucine zipper (bZIP) transcription factor family protein
Carubv10012159m.g	-0.71014	0.0266576	AT1G06080	ADS1	delta 9 desaturase 1
Carubv10009877m.g	0.172239	NA	AT1G06090	0	Fatty acid desaturase family protein
Carubv10011680m.g	0.889792	NA	AT1G06090	0	Fatty acid desaturase family protein
Carubv10012429m.g	0.130781	0.740309	AT1G06110	SKIP16	SKP1/ASK-interacting protein 16
Carubv10011404m.g	-0.447191	0.115947	AT1G06130	GLX2-4	glyoxalase 2-4
Carubv10010975m.g	0.170815	NA	AT1G06135	0	0
Carubv10011363m.g	0.167261	NA	AT1G06137	0	0
Carubv10011460m.g	0.345841	0.687473	AT1G06140	0	Pentatricopeptide repeat (PPR) superfamily protein
Carubv10011638m.g	-0.512039	0.133913	AT1G06150	EMB1444	basic helix-loop-helix (bHLH) DNA-binding superfamily protein
Carubv10010105m.g	0.616946	NA	AT1G06160	ORA59	octadecanoid-responsive Arabidopsis AP2/ERF 59
Carubv10009189m.g	-2.76355	9.37857e-07	AT1G06170	0	basic helix-loop-helix (bHLH) DNA-binding superfamily protein
Carubv10010717m.g	-1.31937	0.00512176	AT1G06180	ATMYB13,ATMYBLFGN,MYB13	myb domain protein 13
Carubv10012682m.g	-0.969085	0.02625	AT1G06180	ATMYB13,ATMYBLFGN,MYB13	myb domain protein 13
Carubv10011218m.g	-0.467946	0.0765295	AT1G06190	0	Rho termination factor
Carubv10012464m.g	-0.483451	0.0727635	AT1G06200	0	Peptidase S24/S26A/S26B/S26C family protein
Carubv10009444m.g	-0.770385	0.0147808	AT1G06210	0	ENTH/VHS/GAT family protein
Carubv10011516m.g	0.167261	NA	AT1G06225	CLE3	CLAVATA3/ESR-RELATED 3
Carubv10008353m.g	0.0684632	0.853042	AT1G06230	GTE4	global transcription factor group E4
Carubv10011561m.g	-0.0725484	0.909167	AT1G06240	0	Protein of unknown function DUF455
Carubv10012192m.g	0.692066	0.14785	AT1G06250	0	alpha/beta-Hydrolases superfamily protein
Carubv10011832m.g	-0.170518	0.75463	AT1G06260	0	Cysteine proteinases superfamily protein
Carubv10009635m.g	-0.454892	0.23598	AT1G06270	0	Pentatricopeptide repeat (PPR) superfamily protein
Carubv10011711m.g	0.167261	NA	AT1G06280	LBD2	LOB domain-containing protein 2
Carubv10012245m.g	-0.112177	0.831371	AT1G06290	ACX3,ATACX3	acyl-CoA oxidase 3
Carubv10010824m.g	1.36094	0.124482	AT1G06290	ACX3,ATACX3	acyl-CoA oxidase 3
Carubv10011022m.g	0.0938279	0.893756	AT1G06320	0	0
Carubv10012029m.g	-3.80396	0.00512176	AT1G06330	0	Heavy metal transport/detoxification superfamily protein
Carubv10011095m.g	0.171278	NA	AT1G06340	0	Plant Tudor-like protein
Carubv10011896m.g	2.52199	0.00421892	AT1G06360	0	Fatty acid desaturase family protein
Carubv10010791m.g	0.960143	0.360877	0	0	0
Carubv10011944m.g	0.299421	0.427885	AT1G06380	0	Ribosomal protein L1p/L10e family
Carubv10009298m.g	-0.791092	0.0168102	AT1G06390	ATGSK1,ATSK2-3,ATSK22,BIL2,GSK1,SK22	GSK3/SHAGGY-like protein kinase 1
Carubv10010250m.g	0.167261	NA	AT1G06400	ARA-2,ARA2,ATRAB11E,ATRABA1A	Ras-related small GTP-binding family protein
Carubv10008292m.g	0.0030469	0.995013	AT1G06410	ATTPS7,ATTPSA,TPS7	trehalose-phosphatase/synthase 7
Carubv10010258m.g	0.0721808	0.922189	AT1G06420	0	0
Carubv10011447m.g	-0.435189	0.342406	AT1G06430	FTSH8	FTSH protease 8
Carubv10012333m.g	0.472641	0.570594	AT1G06440	0	Ubiquitin carboxyl-terminal hydrolase family protein
Carubv10011336m.g	1.60646	1.83457e-10	AT1G06450	0	Polynucleotidyl transferase, ribonuclease H-like superfamily protein
Carubv10012533m.g	1.17842	0.00288654	AT1G06460	ACD31.2,ACD32.1	alpha-crystallin domain 32.1
Carubv10009289m.g	0.0195001	0.966564	AT1G06470	0	Nucleotide/sugar transporter family protein
Carubv10010766m.g	-0.00243355	0.998266	AT1G06475	0	0
Carubv10010938m.g	0.637451	0.143503	AT1G06500	0	0
Carubv10011989m.g	-0.224299	0.649279	AT1G06510	0	0
Carubv10012249m.g	-0.410172	0.452529	AT1G06520	ATGPAT1,GPAT1	glycerol-3-phosphate acyltransferase 1
Carubv10009757m.g	0.192446	0.534201	AT1G06530	0	Tropomyosin-related
Carubv10012251m.g	0.481038	0.386405	AT1G06540	0	0
Carubv10009384m.g	0.292962	0.218357	AT1G06550	0	ATP-dependent caseinolytic (Clp) protease/crotonase family protein
Carubv10011768m.g	0.112016	0.764985	AT1G06560	0	NOL1/NOP2/sun family protein
Carubv10009131m.g	0.171806	0.717823	AT1G06570	HPD,PDS1	phytoene desaturation 1
Carubv10008254m.g	-0.314341	0.465432	AT1G06590	0	0
Carubv10011473m.g	2.00979	2.35976e-07	AT1G06620	0	2-oxoglutarate (2OG) and Fe(II)-dependent oxygenase superfamily protein
Carubv10009503m.g	1.72751	6.99186e-06	AT1G06650	0	2-oxoglutarate (2OG) and Fe(II)-dependent oxygenase superfamily protein
Carubv10012295m.g	1.24317	0.360506	AT1G06650	0	2-oxoglutarate (2OG) and Fe(II)-dependent oxygenase superfamily protein
Carubv10012445m.g	-1.72487	1.17163e-05	AT1G06660	0	0
[truncated: 25,959 more rows]

## Sheet: Cr x 4xCr
Supplementary Table 1. Gene expression in all analyzed genotypes.
[truncated: 26,523 more rows]

[truncated: 3 more sheets: 4xCr x Cg, nrpd1 x Cr, nrpd1 x nrpd1]
