# Supplementary material for: Dosage sensitive maternal siRNAs determine hybridization success in Capsella
Source: Research Square preprint supplement (doi:10.21203/rs.3.rs-3705839/v1), 2023-12-06
Supplement: Supplementary file 4 [file f108b6d7bb7a56c32866eb5c.xlsx]

## Sheet: Sheet1
Supplementary Table 4. List of potential trans targets affected in Cr x Cg hybrids. Genes were selected based on differences in sirenRNA accumulation in trans (Diff_RPM) >0, differences in DNA methylation (diff_CHH >0.01 OR diff_CHG>0.05) and increased expression in Cr x Cg compared to Cr x Cr (log2 FoldChange>1, padj<0.05).
Gene	endo_Cr_x_Cr.RPM	endo_Cr_x_Cr.CHH	endo_Cr_x_Cr.CHG	endo_Cr_x_Cr.RNASEQ	endo_Cr_x_Cg.RPM	endo_Cr_x_Cg.CHH	endo_Cr_x_Cg.CHG	endo_Cr_x_Cg.RNASEQ	diff_RPM	diff_CHH	diff_CHG	log2FoldChange_vs_Cr	padj_vs_Cr	Ath ortholog	Ath ortholog names
Carubv10021959m.g	227.953	0.144017	0.336615	0.212659	132.302	0.0251241	0.0731139	8.006	95.6504	0.118893	0.263501	4.82341	5.06142e-23	AT1G66310	0	F-box/RNI-like/FBD-like domains-containing protein
Carubv10006326m.g	1.02028	0.0877766	0.289236	7.23322	0.451616	0.0145082	0.0971167	17.9195	0.568666	0.0732685	0.192119	1.17909	0.000426452	AT5G39440	SnRK1.3	SNF1-related protein kinase 1.3
Carubv10017299m.g	0.328758	0.11349	0.495321	0.0902592	0.244626	0.0494891	0.279838	3.02947	0.0841321	0.0640006	0.215482	4.45295	1.67525e-09	0	0	0
Carubv10013358m.g	2.778	0.0960622	0.417959	0	0.733877	0.035389	0.238211	0.261863	2.04412	0.0606733	0.179747	3.32735	0.00514825	AT4G05360	0	Zinc knuckle (CCHC-type) family protein
Carubv10016400m.g	1.63378	0.0923519	0.33505	0	0.880651	0.0403885	0.1369	4.07307	0.75313	0.0519634	0.19815	3.62657	0.000976955	AT2G18490	0	C2H2-like zinc finger protein
Carubv10021781m.g	1.50631	0.0800725	0.194171	0	1.19255	0.0286125	0.0514071	6.12316	0.313757	0.05146	0.142764	5.39579	2.25548e-07	0	0	0
Carubv10021807m.g	4.92757	0.0849946	0.405037	0	0.89696	0.0406773	0.26115	0.427696	4.03061	0.0443173	0.143888	2.67515	0.0499383	AT5G28180	0	Galactose oxidase/kelch repeat superfamily protein
Carubv10020348m.g	2.21911	0.0766524	0.0767778	0.174324	1.39437	0.0363679	0.0501966	8.62912	0.824747	0.0402845	0.0265812	5.16291	4.53918e-27	AT1G60410	0	F-box family protein
Carubv10027714m.g	0.349679	0.0583074	0.0726039	0.665719	0	0.0188621	0.0327745	27.4776	0.349679	0.0394453	0.0398294	5.18659	3.8864e-12	AT5G54350	0	0
Carubv10001236m.g	0.669256	0.0857902	0.482964	0	0.407709	0.046462	0.32674	0.259142	0.261547	0.0393282	0.156224	3.38824	0.00137593	AT4G11580	0	RNI-like superfamily protein
Carubv10022820m.g	0.197255	0.0821651	0.362454	0	0	0.043353	0.233402	1.00711	0.197255	0.0388122	0.129052	5.5611	0.000457705	AT4G05360	0	Zinc knuckle (CCHC-type) family protein
Carubv10012560m.g	2.50287	0.102618	0.404683	1.86486	1.22313	0.0639706	0.266067	5.7255	1.27974	0.0386471	0.138617	1.32092	0.0418248	AT5G50900	0	ARM repeat superfamily protein
Carubv10018260m.g	0.813675	0.0654836	0.4622	0.0790817	0.733876	0.0286418	0.187638	1.08024	0.0797988	0.0368417	0.274562	2.45303	0.0248029	AT3G11800	0	0
Carubv10021747m.g	0.443823	0.05895	0.245062	0.104413	0.244626	0.0229745	0.0413217	4.72703	0.199197	0.0359755	0.203741	4.76334	4.67142e-15	AT1G66310	0	F-box/RNI-like/FBD-like domains-containing protein
Carubv10019338m.g	6.22831	0.0721745	0.273114	0.803495	0.880651	0.0367964	0.190576	139.066	5.34766	0.0353781	0.0825381	7.32625	4.11282e-13	AT3G61500	0	0
Carubv10015092m.g	0.562176	0.0971738	0.485496	1.18416	0.293551	0.0624163	0.347312	2.77293	0.268625	0.0347575	0.138184	1.06399	0.000429916	AT3G21110	ATPURC,PUR7,PURC	purin 7
Carubv10025290m.g	4.68649	0.0942225	0.197371	23.5926	3.14519	0.0594727	0.174457	110.952	1.54131	0.0347498	0.0229143	2.17361	0.00825263	AT1G77525	0	0
Carubv10021253m.g	0.419166	0.0520327	0.424355	4.29583	0.244626	0.0180039	0.213	22.1681	0.17454	0.0340288	0.211355	2.23885	1.30655e-06	AT5G50900	0	ARM repeat superfamily protein
Carubv10003118m.g	4.82438	0.083033	0.32687	0	0.880651	0.0505697	0.223555	19.777	3.94373	0.0324633	0.103315	7.87429	7.44434e-17	AT3G61500	0	0
Carubv10021806m.g	0.789018	0.0746741	0.34022	9.33542	0.244626	0.0429278	0.10502	496.628	0.544392	0.0317463	0.2352	5.67306	1.49539e-09	AT1G66855	0	Carbohydrate-binding X8 domain superfamily protein
Carubv10026015m.g	0.443822	0.0705402	0.443663	1.31911	0.407709	0.0389153	0.278915	6.08244	0.0361135	0.0316249	0.164748	2.07243	1.247e-16	AT5G42940	0	RING/U-box superfamily protein
Carubv10007682m.g	1.59776	0.0648589	0.281871	0.329182	0.733877	0.0359322	0.168344	3.18615	0.863883	0.0289267	0.113526	2.74839	1.3599e-05	AT4G16460	0	0
Carubv10012509m.g	0.134492	0.0549705	0.290782	0	0	0.0273636	0.204845	46.6811	0.134492	0.0276068	0.0859364	7.43017	5.18409e-15	AT4G35725	0	0
Carubv10003905m.g	0.295882	0.0619524	0.5275	0	0	0.0347429	0.266269	4.03321	0.295882	0.0272095	0.261231	3.66875	0.001927	AT5G03400	0	0
Carubv10017740m.g	0.256431	0.040561	0.272485	0.0793949	0	0.0136133	0.117507	6.1766	0.256431	0.0269477	0.154977	5.17725	5.03325e-12	AT3G45200	0	0
Carubv10002961m.g	0.315607	0.0574235	0.432982	0	0.244626	0.0311861	0.26961	4.86343	0.0709817	0.0262374	0.163372	5.67037	1.7953e-08	AT3G51700	0	PIF1 helicase
Carubv10021798m.g	31.13	0.0619157	0.267306	0.137276	12.4759	0.0358676	0.151008	2.72473	18.6541	0.0260481	0.116297	3.71042	5.30202e-09	AT4G05475	0	RNI-like superfamily protein
Carubv10024812m.g	0.996135	0.0503384	0.263674	0.291832	0.978502	0.0251426	0.140006	5.26454	0.0176327	0.0251959	0.123668	3.94981	7.0086e-21	AT2G22030	0	Galactose oxidase/kelch repeat superfamily protein
Carubv10019051m.g	0.236705	0.0504004	0.0555382	0	0	0.0254764	0.0461118	6.80798	0.236705	0.0249239	0.00942647	7.44688	3.49102e-15	AT3G29830	0	F-box/RNI-like superfamily protein
Carubv10012115m.g	0.803108	0.052628	0.260571	0	0.326168	0.0277488	0.128076	0.640687	0.47694	0.0248792	0.132495	2.69606	0.046362	AT1G80220	0	Protein of unknown function (DUF1644)
Carubv10019291m.g	0.653406	0.0373143	0.272179	0.0184025	0.244626	0.0124777	0.167067	0.904949	0.40878	0.0248366	0.105111	4.20187	3.51369e-07	AT3G43990	0	Bromo-adjacent homology (BAH) domain-containing protein
Carubv10018496m.g	2.08234	0.0748357	0.461335	0.724099	1.65802	0.0502071	0.356171	2.84217	0.424319	0.0246286	0.105165	1.76003	0.000522785	AT1G19260	0	TTF-type zinc finger protein with HAT dimerisation domain
Carubv10009838m.g	1.56571	0.0618706	0.368627	0.391377	0.538176	0.0374461	0.267324	4.3448	1.02753	0.0244245	0.101303	3.23605	7.01194e-17	AT1G06050	0	Protein of unknown function (DUF1336)
Carubv10007828m.g	0.754498	0.086036	0.13489	0.0216522	0	0.0626566	0.09277	141.3	0.754498	0.0233794	0.04212	11.268	9.12814e-57	AT4G32370	0	Pectin lyase-like superfamily protein
Carubv10007319m.g	1.27767	0.0621125	0.325783	3.10809	0.587101	0.0393812	0.218017	9.80128	0.69057	0.0227313	0.107767	1.38801	0.0321249	AT5G50900	0	ARM repeat superfamily protein
Carubv10024482m.g	0.273122	0.0342655	0.248324	1.61733	0.244626	0.0115792	0.165381	4.02611	0.0284959	0.0226862	0.0829429	1.16128	0.0092136	AT2G28700	AGL46	AGAMOUS-like 46
Carubv10021657m.g	1.006	0.0606123	0.325425	0	0.800593	0.0385746	0.222962	1.37245	0.205405	0.0220377	0.102463	4.52548	2.07363e-05	AT1G57780	0	heavy-metal-associated domain-containing protein
Carubv10012416m.g	0.489735	0.073104	0.282142	0.343348	0.407709	0.0512013	0.144487	1.95643	0.082026	0.0219027	0.137655	2.1349	0.000212557	AT1G24480	0	S-adenosyl-L-methionine-dependent methyltransferases superfamily protein
Carubv10009644m.g	2.42728	0.0444211	0.21929	0.264964	1.76527	0.022882	0.127131	1.08374	0.662006	0.021539	0.0921592	1.81155	0.000269881	AT3G32960	0	Domain of unknown function (DUF1985)
Carubv10002744m.g	0.575325	0.0267037	0.190583	19.7186	0.314519	0.00628148	0.1567	493.624	0.260807	0.0204222	0.0338833	4.57577	1.5247e-31	AT1G08985	0	AP2/B3-like transcriptional factor family protein
Carubv10021360m.g	0.35136	0.0281364	0.200288	1.90537	0.244626	0.00793571	0.0125	11.3882	0.106734	0.0202006	0.187787	2.37561	3.73267e-05	AT1G22590	AGL87	AGAMOUS-like 87
Carubv10006850m.g	0.32278	0.0424478	0.215314	2.08938	0.293551	0.0223925	0.162986	248.626	0.0292292	0.0200552	0.0523286	6.80114	2.76417e-22	AT4G13380	MEE56	Heavy metal transport/detoxification superfamily protein
Carubv10006042m.g	1.03559	0.0726355	0.319331	0.232263	0.407709	0.0527747	0.255142	1.14821	0.627876	0.0198608	0.0641896	1.88341	0.00247736	AT5G05170	ATCESA3,ATH-B,CESA3,CEV1,IXR1	Cellulose synthase family protein
Carubv10015305m.g	1.9655	0.0719413	0.275764	0	0.524197	0.0521424	0.194052	1.10979	1.4413	0.0197988	0.0817121	4.20093	0.000178326	AT5G50115	0	0
Carubv10002458m.g	2.09583	0.034182	0.189511	1.30743	0.992891	0.015158	0.130222	207.621	1.10294	0.019024	0.0592889	7.01549	1.79784e-53	AT2G21920	0	F-box associated ubiquitination effector family protein
Carubv10007644m.g	4.993	0.0201495	0.0719346	0.577117	0.838716	0.00140541	0.00937692	33.1692	4.15429	0.0187441	0.0625577	5.54716	4.57723e-29	AT4G36590	0	MADS-box transcription factor family protein
Carubv10018652m.g	1.46315	0.0312498	0.0880729	0	0.670061	0.012625	0.0970081	2.02652	0.79309	0.0186248	-0.00893515	5.89071	5.0313e-10	AT3G50720	0	Protein kinase superfamily protein
Carubv10015674m.g	1.45749	0.0305926	0.335029	0.106492	0.880651	0.0119778	0.235257	16.6248	0.576839	0.0186148	0.0997714	5.1647	1.22545e-09	AT2G18490	0	C2H2-like zinc finger protein
Carubv10024633m.g	2.25127	0.043765	0.222587	0.426775	0.440325	0.0253902	0.149712	35.1534	1.81095	0.0183748	0.072875	6.1081	3.85376e-35	AT1G30790	0	F-box and associated interaction domains-containing protein
Carubv10021989m.g	0.273122	0.0516368	0.11292	0.0764796	0	0.0333331	0.0695855	17.4813	0.273122	0.0183037	0.0433345	7.14856	1.68782e-34	AT1G67390	0	F-box family protein
Carubv10006800m.g	0.954891	0.0354357	0.287612	0.534592	0.314519	0.017631	0.15595	258.178	0.640372	0.0178048	0.131662	8.26708	1.54489e-58	AT4G35725	0	0
Carubv10002823m.g	0.126807	0.0317419	0.134883	0	0	0.0142645	0.0795	11.8925	0.126807	0.0174774	0.0553833	6.17127	2.30773e-09	AT5G06500	AGL96	AGAMOUS-like 96
Carubv10006957m.g	0.493136	0.0404557	0.22497	1.99697	0.244626	0.0243345	0.185767	7.02893	0.248511	0.0161213	0.039203	1.70671	9.72073e-05	AT1G55650	0	HMG (high mobility group) box protein with ARID/BRIGHT DNA-binding domain
Carubv10010890m.g	0.324061	0.0518949	0.339745	1.6657	0	0.0363647	0.260375	7.69402	0.324061	0.0155301	0.0793706	2.07011	9.05932e-06	AT1G55650	0	HMG (high mobility group) box protein with ARID/BRIGHT DNA-binding domain
Carubv10028009m.g	0.579435	0.0548802	0.251025	0.0220087	0.419358	0.0393917	0.218836	0.747294	0.160077	0.0154885	0.0321898	3.70405	4.7338e-05	AT4G38180	FRS5	FAR1-related sequence 5
Carubv10011303m.g	4.04601	0.0325081	0.294088	16.6039	0.570792	0.0173871	0.101581	71.4734	3.47522	0.015121	0.192506	1.98089	1.2994e-07	AT1G22590	AGL87	AGAMOUS-like 87
Carubv10003604m.g	0.821893	0.0482664	0.379504	0	0.458673	0.0335441	0.242596	0.52525	0.363221	0.0147224	0.136908	3.21852	0.0088502	AT4G29550	0	Protein of unknown function (DUF626)
Carubv10022377m.g	0.676301	0.0173933	0.0566714	0	0.440325	0.00315714	0.0232375	13.431	0.235976	0.0142362	0.0334339	5.96559	9.53094e-10	AT1G04645	0	Plant self-incompatibility protein S1 family
Carubv10025370m.g	0.744806	0.0306074	0.166073	0.116216	0.579376	0.016387	0.0989109	9.14113	0.16543	0.0142204	0.0671618	5.9003	1.19343e-35	AT2G25120	0	Bromo-adjacent homology (BAH) domain-containing protein
Carubv10022314m.g	1.06071	0.0551799	0.130565	0.742981	1.00908	0.0411232	0.0961425	5.16425	0.0516272	0.0140567	0.0344225	2.64813	2.24045e-07	AT1G66300	0	F-box/RNI-like/FBD-like domains-containing protein
Carubv10022055m.g	2.02651	0.0399728	0.2423	0.105512	1.12904	0.0261506	0.184474	2.69037	0.897469	0.0138222	0.0578263	3.96375	1.17005e-09	AT5G66550	0	Maf-like protein
Carubv10027589m.g	0.126807	0.0727094	0.123613	0.135496	0	0.0593073	0.125235	53.7275	0.126807	0.0134021	-0.00162174	8.1577	1.11777e-63	AT5G45180	0	Flavin-binding monooxygenase family protein
Carubv10021130m.g	2.29743	0.0299577	0.0223448	0.127486	1.50638	0.0166195	0.0247968	3.86434	0.791056	0.0133382	-0.00245195	4.21846	1.02661e-12	AT2G37435	0	Cystatin/monellin superfamily protein
Carubv10020903m.g	0.16139	0.0267049	0.282205	37.8441	0	0.0137756	0.243924	124.635	0.16139	0.0129293	0.038281	1.60285	1.94726e-07	AT1G65300	AGL38,PHE2	AGAMOUS-like 38
Carubv10011537m.g	0.777242	0.0378808	0.214739	0	0.326168	0.02515	0.106365	0.790768	0.451074	0.0127308	0.108374	2.75936	0.0371491	AT1G80220	0	Protein of unknown function (DUF1644)
Carubv10002931m.g	0.355058	0.0253419	0.171443	0.227594	0.244626	0.012662	0.127789	40.6426	0.110433	0.0126799	0.0436543	7.15398	3.75238e-79	AT5G14400	CYP724A1	cytochrome P450, family 724, subfamily A, polypeptide 1
Carubv10021680m.g	35.6755	0.0171972	0.111857	0.226682	13.8816	0.00468404	0.043245	1.38603	21.7939	0.0125132	0.0686125	2.24081	0.000538107	AT4G05475	0	RNI-like superfamily protein
Carubv10019216m.g	0.695322	0.0293547	0.233569	0.0291014	0.244626	0.0168786	0.182997	0.704178	0.450697	0.0124761	0.0505718	3.19914	0.00026131	AT3G43990	0	Bromo-adjacent homology (BAH) domain-containing protein
Carubv10017937m.g	0.618662	0.0254915	0.0973316	6.2724	0.550407	0.0132268	0.0887741	672.705	0.0682553	0.0122648	0.0085575	6.66623	2.16641e-89	AT3G49300	0	proline-rich family protein
Carubv10025133m.g	106.797	0.0238978	0.0852333	0.149566	68.9585	0.0116527	0.0389194	1.70115	37.839	0.0122452	0.0463139	2.94155	6.96194e-05	AT5G44220	0	F-box family protein
Carubv10022008m.g	5.63313	0.0834175	0.309583	0	1.36291	0.0712929	0.1451	2.41998	4.27022	0.0121245	0.164483	4.77276	4.4089e-06	AT1G66620	0	Protein with RING/U-box and TRAF-like domains
Carubv10005185m.g	23.1712	0.0177471	0.0229041	3.25506	20.5485	0.00648987	0.016849	7.98856	2.62268	0.0112573	0.0060551	1.16343	0.000777114	AT4G13985	FBD1	FBD-associated F-box protein
Carubv10024493m.g	0.424526	0.0289777	0.179171	0.349255	0.293551	0.0180007	0.0965095	11.9587	0.130975	0.010977	0.0826619	4.71824	8.71797e-26	AT2G28700	AGL46	AGAMOUS-like 46
Carubv10025621m.g	0.402399	0.0372556	0.15167	3.08552	0.244626	0.0263037	0.10433	81.914	0.157774	0.0109519	0.04734	4.62914	5.86428e-45	AT2G26320	AGL33	AGAMOUS-like 33
Carubv10027768m.g	14.0271	0.0402006	0.133409	0.0175968	4.61588	0.0292837	0.0853609	0.824126	9.41118	0.0109169	0.0480478	3.46952	0.00054796	AT5G50115	0	0
Carubv10016152m.g	0.164379	0.0276718	0.203279	1.45007	0	0.0168248	0.141062	47.6517	0.164379	0.010847	0.0622172	4.90771	3.91243e-34	AT2G04920	0	F-box and associated interaction domains-containing protein
Carubv10028401m.g	0.51568	0.0415878	0.291677	0.402554	0.48925	0.0307527	0.239837	2.04242	0.0264298	0.0108351	0.05184	1.9563	0.00519261	AT5G65274	0	ARP2/3 complex 16 kDa subunit (p16-Arc)
Carubv10022038m.g	0.828469	0.0183602	0.0376323	0.0433688	0.508068	0.00769775	0.0354758	5.4276	0.320401	0.0106624	0.0021565	6.24663	1.5206e-30	AT1G61320	0	FBD / Leucine Rich Repeat domains containing protein
Carubv10015573m.g	0.526012	0.01795	0.144256	0	0	0.00739348	0.101189	28.9696	0.526012	0.0105565	0.0430667	7.12538	1.16566e-13	AT2G13542	0	0
Carubv10000067m.g	0.92463	0.0216706	0.0172753	0.624404	0.538176	0.0112022	0.00875829	1.57232	0.386454	0.0104684	0.00851696	1.20733	1.96905e-05	AT5G07400	0	forkhead-associated domain-containing protein / FHA domain-containing protein
Carubv10010996m.g	0.7508	0.03042	0.186336	0	0.326168	0.0201072	0.133868	1.38731	0.424633	0.0103128	0.0524682	3.7409	0.00162639	AT1G80220	0	Protein of unknown function (DUF1644)
Carubv10027634m.g	1.05531	0.0301207	0.141498	0	0.629038	0.020044	0.0932729	0.114507	0.426273	0.0100767	0.0482249	2.7505	0.0425648	AT5G46260	0	disease resistance protein (TIR-NBS-LRR class) family
Carubv10025606m.g	1.49458	0.0172	0.0240025	5.10669	0.508068	0.00714298	0.0253225	15.675	0.986514	0.010057	-0.00132	1.50311	0.000209451	AT2G27550	ATC	centroradialis
Carubv10016017m.g	0.565657	0.0244941	0.123086	0.282174	0.293551	0.0144547	0.0798276	72.4738	0.272106	0.0100394	0.0432586	7.83467	1.25458e-20	AT2G19360	0	Protein of Unknown Function (DUF239)
Carubv10012521m.g	0.948862	0.0193183	0.0191394	1.32832	0.795033	0.00927908	0.011597	24.0656	0.153828	0.0100392	0.00754242	4.0478	2.83042e-31	AT1G20940	0	F-box family protein
Carubv10011287m.g	0.473411	0.0421223	0.272802	0	0	0.0324623	0.21566	3.3245	0.473411	0.00966	0.0571422	6.27649	3.20809e-09	AT1G19260	0	TTF-type zinc finger protein with HAT dimerisation domain
Carubv10024955m.g	0.332867	0.0166017	0.111827	0	0.293551	0.00720424	0.0302222	0.49112	0.039316	0.00939746	0.0816044	2.93591	0.0109618	AT2G45110	ATEXPB4,ATHEXP BETA 1.1,EXPB4	expansin B4
Carubv10021354m.g	0.39451	0.0553445	0.189777	0.121656	0.244626	0.0459594	0.113958	8.07162	0.149884	0.00938515	0.0758194	5.41433	1.65198e-23	AT1G66300	0	F-box/RNI-like/FBD-like domains-containing protein
Carubv10002082m.g	0.641077	0.0285	0.23825	0.291596	0.611564	0.0201566	0.146617	5.27293	0.0295133	0.0083434	0.0916333	3.54494	1.31849e-06	AT4G03566	0	0
Carubv10011010m.g	3.11572	0.0288041	0.217574	0	0.811127	0.0211123	0.117774	0.425798	2.30459	0.00769175	0.0997999	3.84007	0.000553552	AT1G34410	ARF21	auxin response factor 21
Carubv10015590m.g	8.67239	0.021125	0.140255	0.0436046	4.03632	0.0137803	0.06389	45.7104	4.63607	0.00734471	0.0763652	8.62057	2.31602e-33	AT2G16450	0	F-box and associated interaction domains-containing protein
Carubv10019341m.g	1.14126	0.0204354	0.191229	0.60426	0.733876	0.0131443	0.113679	33.2383	0.407381	0.00729108	0.07755	5.45114	4.29209e-30	AT4G21080	0	Dof-type zinc finger domain-containing protein
Carubv10012488m.g	1.00462	0.026343	0.14494	0	0.790329	0.0194975	0.0937	1.28134	0.214293	0.00684545	0.05124	3.81233	0.000770017	AT1G80220	0	Protein of unknown function (DUF1644)
Carubv10011988m.g	0.382181	0.0197208	0.197486	0.0121498	0.314519	0.0132586	0.14565	4.4194	0.0676623	0.00646219	0.0518357	6.45052	8.98249e-15	AT5G36200	0	F-box and associated interaction domains-containing protein
Carubv10027823m.g	0.55317	0.0350435	0.246036	0.949319	0.419358	0.0288811	0.169952	26.2029	0.133813	0.00616237	0.0760841	4.63928	1.29965e-41	AT1G17770	SDG17,SUVH7	SU(VAR)3-9 homolog 7
Carubv10002669m.g	0.564865	0.0317211	0.26475	0.885312	0.440325	0.027193	0.18823	71.6556	0.12454	0.00452813	0.07652	6.12683	1.07068e-17	AT5G11220	0	0
Carubv10015840m.g	0.789018	0.00698083	0.132848	0	0.419358	0.0025959	0.0757591	0.403119	0.36966	0.00438493	0.0570887	3.23113	0.00866715	AT2G14710	0	F-box family protein
Carubv10019328m.g	1.47941	0.0161479	0.228894	1.77928	0.293551	0.012172	0.116533	205.485	1.18586	0.00397589	0.112361	6.72488	5.81926e-59	AT2G03190	ASK16,SK16	SKP1-like 16
Carubv10015344m.g	0.797594	0.0187936	0.228095	0.179594	0.244626	0.015067	0.17766	1.00465	0.552968	0.0037266	0.050435	1.91652	0.0250393	AT2G26940	0	C2H2-type zinc finger family protein
Carubv10006929m.g	6.24895	0.0057575	0.06825	58.1333	4.8892	0.0026175	0	731.441	1.35974	0.00314	0.06825	3.62688	5.93685e-08	AT4G22105	SCRL26	SCR-like 26
Carubv10019558m.g	0.655738	0.00893091	0.109962	0.0723073	0.326168	0.00664602	0.014148	1.09118	0.329571	0.00228489	0.0958135	2.92287	0.00209344	AT2G16450	0	F-box and associated interaction domains-containing protein
Carubv10003420m.g	113.237	0.0135545	0.2304	36.6207	109.115	0.0124091	0.141643	1155.8	4.12161	0.00114545	0.0887571	4.92312	4.91263e-37	AT4G05270	0	Ubiquitin-like superfamily protein
Carubv10002477m.g	0.295882	0.0153142	0.155721	0.523853	0.293551	0.0147136	0.096175	2.60674	0.00233093	0.000600576	0.0595458	2.1401	4.57557e-07	AT4G00540	ATMYB3R2,MYB3R-2,MYB3R2,PC-MYB2	myb domain protein 3r2
Carubv10022067m.g	0.507226	0.0232762	0.225709	0.541227	0.440325	0.0255835	0.0998964	6.09161	0.0669003	-0.00230724	0.125813	3.23958	1.83065e-19	AT1G55650	0	HMG (high mobility group) box protein with ARID/BRIGHT DNA-binding domain
Carubv10019215m.g	1.40332	0	0.148144	0	1.12904	0.0023101	0.0347789	3.45827	0.274283	-0.0023101	0.113365	5.21919	1.96591e-07	AT5G39560	0	Galactose oxidase/kelch repeat superfamily protein
Carubv10021906m.g	0.430374	0.0237564	0.285136	0.129441	0.293551	0.0260836	0.232	56.9848	0.136823	-0.00232727	0.0531364	7.31386	4.39784e-25	AT4G24975	0	Plant self-incompatibility protein S1 family
Carubv10002555m.g	0.203419	0.0261357	0.138054	1.4722	0	0.0469527	0.0853267	200.633	0.203419	-0.020817	0.0527272	6.92472	4.40089e-21	AT5G26630	0	MADS-box transcription factor family protein
